# Supplementary material for: Postnatal persistence of sex-dependent renal developmentally programmed structural and molecular changes in nonhuman primates
Source: bioRxiv or medRxiv preprint supplement (doi:10.1101/2020.12.01.406355), 2020-12-02
Supplement: Supplementary file [file media-1.pdf]

# Supplemental Figure 1

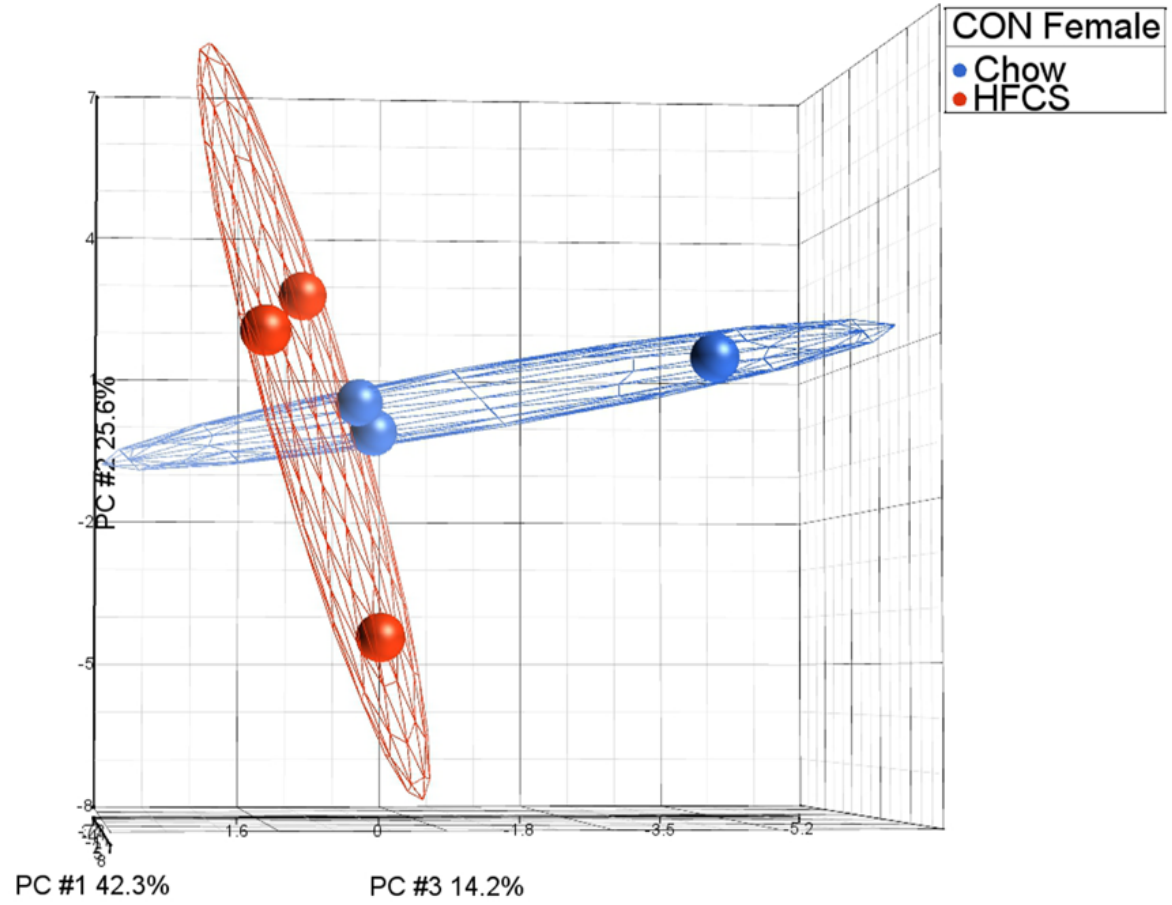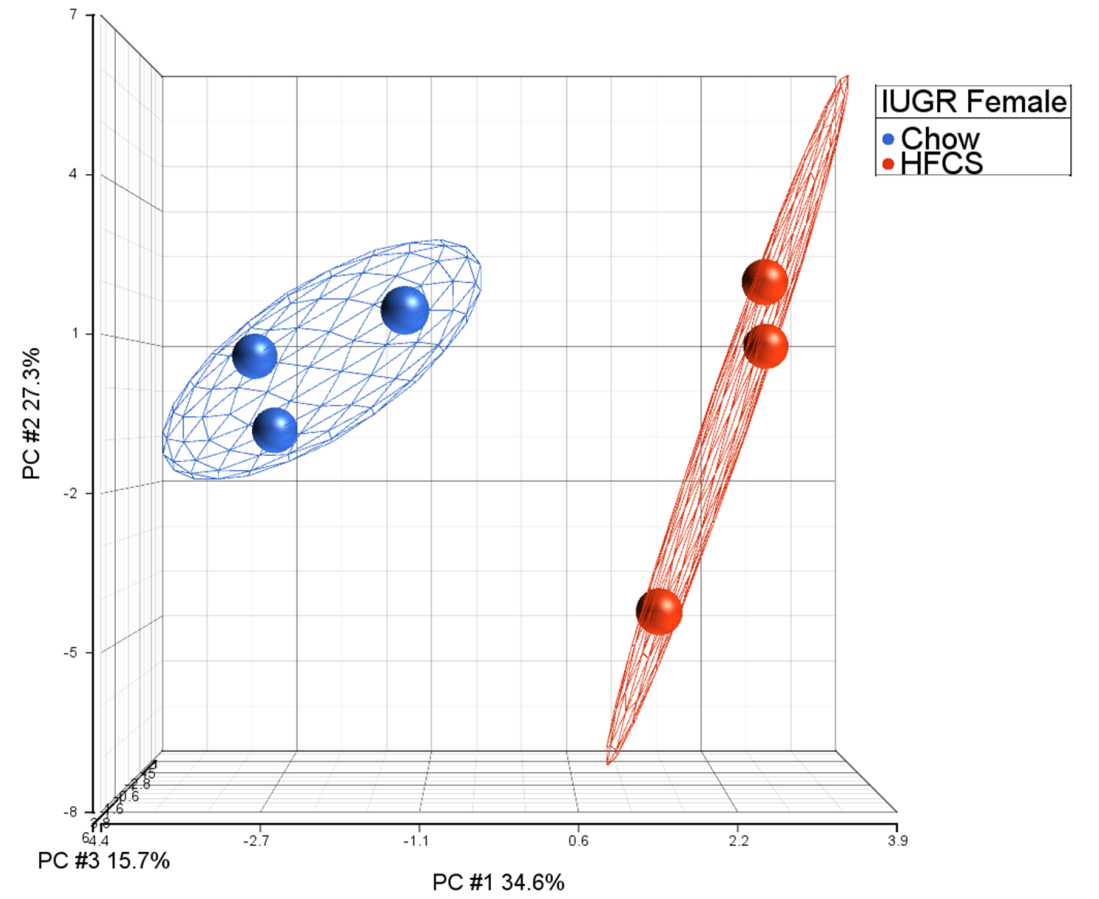

**Supplementary Table 1: IUGR vs CON Chow Diet Gene Expression**

|             |                                                           |               |                 |                  |                        |                         | Nephron Segment-Specific |                     |                             |
|-------------|-----------------------------------------------------------|---------------|-----------------|------------------|------------------------|-------------------------|--------------------------|---------------------|-----------------------------|
| Gene Symbol | Gene Name                                                 | Accession No. | CON Chow F Mean | IUGR Chow F Mean | pval IUGR v CON F Chow | Ratio IUGR v CON F Chow | REFSEQ ID                | NEPHRON (MEAN RPKM) | COLLECTING DUCT (MEAN RPKM) |
| Xist        | X inactive specific transcript (non-protein coding)(XIST) | NR_001564     | 599.6           | 836.2            | 0.0001                 | 1.3                     |                          |                     |                             |
| GTPBP6      | GTP binding protein 6 (putative)(GTPBP6)                  | NM_012227     | 244.8           | 183              | 0.0002                 | 0.69                    |                          |                     |                             |
| CSDE1       | cold shock domain containing E1(CSDE1)                    | NM_001007553  | 143             | 131.3            | 0.0003                 | 0.75                    |                          |                     |                             |
| CSDE1       | cold shock domain containing E1(CSDE1)                    | NM_001007553  | 187.8           | 156.9            | 0.0003                 | 0.75                    |                          |                     |                             |
| OSTM1       | osteopetrosis associated transmembrane protein 1(OSTM1)   | NM_014028     | 91.4            | 131.6            | 0.0003                 | 1.28                    |                          |                     |                             |
|             |                                                           | BQ186959      | 111.6           | 106.8            | 0.0004                 | 0.88                    |                          |                     |                             |
|             |                                                           | DB336481      | 147.3           | 135.5            | 0.0004                 | 0.82                    | NM_017193                | 356.13              | 8.18                        |
| UBC         | ubiquitin C(UBC)                                          | NM_021009     | 10602.5         | 9244.7           | 0.0005                 | 0.68                    | NM_017193                | 356.13              | 8.18                        |

|        |                                                                  |           |         |         |        |      |           |        |      |
|--------|------------------------------------------------------------------|-----------|---------|---------|--------|------|-----------|--------|------|
| UBC    | ubiquitin C(UBC)                                                 | NM_021009 | 12020.7 | 11235.1 | 0.0005 | 0.68 | NM_017193 | 356.13 | 8.18 |
| ODC1   | ornithine decarboxylase 1(ODC1)                                  | NM_002539 | 463.8   | 725.5   | 0.0006 | 1.42 |           |        |      |
| PCDHA3 | protocadherin alpha 3(PCDHA3)                                    | NM_018906 | 105.8   | 136.8   | 0.0006 | 1.15 |           |        |      |
| SREBF1 | sterol regulatory element binding transcription factor 1(SREBF1) | NM_004176 | 150.6   | 118.2   | 0.0008 | 0.73 |           |        |      |
| UAP1L1 | UDP-N-acetylglucosaminase 1 like 1(UAP1L1)                       | NM_207309 | 134.5   | 114.8   | 0.0008 | 0.78 |           |        |      |
| DNAJB6 | DnaJ heat shock protein family (Hsp40) member B6(DNAJB6)         | NM_005494 | 206     | 182.1   | 0.0011 | 0.79 |           |        |      |
| UBE3C  | ubiquitin protein ligase E3C(UBE3C)                              | NM_014671 | 160.3   | 131.2   | 0.0013 | 0.75 |           |        |      |
| UBE3C  | ubiquitin protein ligase E3C(UBE3C)                              | NM_014671 | 478.2   | 511.9   | 0.0013 | 0.75 |           |        |      |
|        |                                                                  | XM_941684 | 297.7   | 538.9   | 0.0014 | 1.65 |           |        |      |

|         |                                                     |              |        |        |        |      |
|---------|-----------------------------------------------------|--------------|--------|--------|--------|------|
| PAH     | phenylalanine hydroxylase(PAH)                      | NM_000277    | 126.8  | 100.9  | 0.0015 | 0.75 |
| ZNF467  | zinc finger protein 467(ZNF467)                     | NM_207336    | 264.2  | 193.3  | 0.0015 | 0.67 |
| CYB5D2  | cytochrome b5 domain containing 2(CYB5D2)           | NM_144611    | 125.3  | 170.6  | 0.0016 | 1.18 |
| NDUFB11 | NADH:ubiquinone oxidoreductase subunit B11(NDUFB11) | NM_019056    | 1498.6 | 1222.1 | 0.0018 | 0.75 |
| APOE    | apolipoprotein E(APOE)                              | NM_000041    | 2789.9 | 1250.2 | 0.0021 | 0.39 |
| LGMN    | legumain(LGMN)                                      | NM_001008530 | 135.2  | 143.9  | 0.0021 | 0.41 |
| LGMN    | legumain(LGMN)                                      | NM_001008530 | 203.6  | 186.1  | 0.0021 | 0.41 |
| LGMN    | legumain(LGMN)                                      | NM_001008530 | 1731.9 | 783.9  | 0.0021 | 0.41 |
|         |                                                     | XM_941785    | 110.7  | 106.4  | 0.0022 | 0.88 |
| NUMA1   | nuclear mitotic apparatus protein 1(NUMA1)          | NM_006185    | 123    | 158    | 0.0024 | 1.3  |
| NUMA1   | nuclear mitotic apparatus protein 1(NUMA1)          | NM_006185    | 252    | 368.7  | 0.0024 | 1.3  |

|         |                                                     |              |       |       |        |      |
|---------|-----------------------------------------------------|--------------|-------|-------|--------|------|
| MID1IP1 | MID1 interacting protein 1(MID1IP1)                 | NM_021242    | 116   | 115.3 | 0.0028 | 0.72 |
| MID1IP1 | MID1 interacting protein 1(MID1IP1)                 | NM_021242    | 199.5 | 158.2 | 0.0028 | 0.72 |
| SRSF12  | serine and arginine rich splicing factor 12(SRSF12) | NM_080743    | 97.8  | 136.2 | 0.0028 | 1.23 |
|         |                                                     | XM_001719540 | 114.6 | 150.1 | 0.0029 | 1.14 |
| BAG3    | BCL2 associated athanogene 3(BAG3)                  | NM_004281    | 291.2 | 149.3 | 0.0031 | 0.47 |
| USP21   | ubiquitin specific peptidase 21(USP21)              | NM_012475    | 133.7 | 142.8 | 0.0032 | 1.24 |
| USP21   | ubiquitin specific peptidase 21(USP21)              | NM_012475    | 150   | 217.3 | 0.0032 | 1.24 |
| CASKIN2 | CASK interacting protein 2(CASKIN2)                 | NM_020753    | 116.9 | 106.8 | 0.0034 | 0.85 |
|         |                                                     | XM_933893    | 108.3 | 149.8 | 0.0034 | 1.2  |
| TIPARP  | TCDD inducible poly(ADP-ribose) polymerase(TIPARP)  | NM_015508    | 396.4 | 319.1 | 0.0036 | 0.75 |

|             |                                                                            |                  |       |       |        |      |
|-------------|----------------------------------------------------------------------------|------------------|-------|-------|--------|------|
| XYLT1       | xylosyltransferase<br>1(XYLT1)                                             | NM_02216<br>6    | 95.4  | 125.5 | 0.0036 | 1.18 |
|             |                                                                            | BX111977         | 112.6 | 145.7 | 0.0036 | 1.14 |
|             |                                                                            | XM_93437<br>6    | 115.9 | 149.6 | 0.0037 | 1.13 |
| SBDSP1      | Shwachman-<br>Bodian-Diamond<br>syndrome<br>pseudogene<br>1(SBDSP1)        | NR_00158<br>8    | 336.4 | 258.4 | 0.0038 | 0.68 |
| SBDSP1      | Shwachman-<br>Bodian-Diamond<br>syndrome<br>pseudogene<br>1(SBDSP1)        | NR_00158<br>8    | 415.5 | 362.7 | 0.0038 | 0.68 |
| DCUN1<br>D2 | defective in cullin<br>neddylation 1<br>domain<br>containing<br>2(DCUN1D2) | NM_00101<br>4283 | 205   | 190.3 | 0.0039 | 0.82 |
| ELMOD<br>2  | ELMO domain<br>containing<br>2(ELMOD2)                                     | NM_15370<br>2    | 160.2 | 132.5 | 0.0041 | 0.77 |
| SCARA<br>3  | scavenger<br>receptor class A<br>member<br>3(SCARA3)                       | NM_01624<br>0    | 97.4  | 131.1 | 0.0041 | 1.19 |
| OR6N2       | olfactory receptor<br>family 6 subfamily<br>N member<br>2(OR6N2)           | NM_00100<br>5278 | 105.4 | 134   | 0.0044 | 1.14 |

|              |                                                                      |                  |        |       |        |      |
|--------------|----------------------------------------------------------------------|------------------|--------|-------|--------|------|
|              |                                                                      | XR_01902<br>9    | 129.5  | 175.5 | 0.0044 | 1.18 |
| ARHGE<br>F37 | Rho guanine<br>nucleotide<br>exchange factor<br>37(ARHGEF37)         | NM_00100<br>1669 | 124.1  | 173.1 | 0.0047 | 1.21 |
| CDCA7        | cell division cycle<br>associated<br>7(CDCA7)                        | NM_03194<br>2    | 128.6  | 214.8 | 0.0049 | 1.45 |
|              |                                                                      | XR_03943<br>9    | 111.5  | 155.4 | 0.0049 | 1.21 |
|              |                                                                      | XR_03943<br>9    | 1038.8 | 1435  | 0.0049 | 1.21 |
| DPCD         | deleted in primary<br>ciliary dyskinesia<br>homolog<br>(mouse)(DPCD) | NM_01544<br>8    | 281.5  | 229.7 | 0.005  | 0.72 |
| SEL1L3       | SEL1L family<br>member<br>3(SEL1L3)                                  | NM_01518<br>7    | 113.5  | 162.3 | 0.0053 | 1.23 |
|              |                                                                      | XR_03870<br>0    | 102.2  | 149.8 | 0.0053 | 1.26 |
|              |                                                                      | XR_01883<br>8    | 192.5  | 163.3 | 0.0056 | 0.77 |
| MRPL53       | mitochondrial<br>ribosomal protein<br>L53(MRPL53)                    | NM_05305<br>0    | 231.1  | 205   | 0.0057 | 0.77 |

|          |                                                               |             |       |       |        |      |           |      |       |
|----------|---------------------------------------------------------------|-------------|-------|-------|--------|------|-----------|------|-------|
| KCNJ14   | potassium voltage-gated channel subfamily J member 14(KCNJ14) | NM_170720   | 120.1 | 162.7 | 0.0059 | 1.18 |           |      |       |
| KMT2C    | lysine methyltransferase 2C(KMT2C)                            | NM_170606   | 127.7 | 200.7 | 0.0059 | 1.34 |           |      |       |
| KMT2C    | lysine methyltransferase 2C(KMT2C)                            | NM_170606   | 138.7 | 155.8 | 0.0059 | 1.34 |           |      |       |
| TRAPP C2 | trafficking protein particle complex 2(TRAPPC2)               | NM_00101658 | 108.3 | 140.7 | 0.006  | 1.14 |           |      |       |
| c1orf216 | chromosome 1 open reading frame 216(C1orf216)                 | NM_152374   | 123.1 | 162   | 0.0061 | 1.15 |           |      |       |
| HAUS4    | HAUS augmin like complex subunit 4(HAUS4)                     | NM_017815   | 164.4 | 138.2 | 0.0062 | 0.76 | NM_053502 | 4.02 | 18.01 |
| SCAPER   | S-phase cyclin A associated protein in the ER(SCAPER)         | NM_020843   | 200.8 | 181.1 | 0.0063 | 0.78 | NM_053502 | 4.02 | 18.01 |



|          |                                                   |              |       |       |        |      |              |       |       |
|----------|---------------------------------------------------|--------------|-------|-------|--------|------|--------------|-------|-------|
| c3p1     | complement component 3 precursor pseudogene(C3P1) | NM_001013640 | 125.7 | 168.7 | 0.0066 | 1.17 | NM_053502    | 4.02  | 18.01 |
|          |                                                   | AK129699     | 141.4 | 332   | 0.0069 | 2.08 |              |       |       |
| PEX2     | peroxisomal biogenesis factor 2(PEX2)             | NM_000318    | 242.1 | 194.7 | 0.007  | 0.71 |              |       |       |
|          |                                                   | XM_928619    | 183.9 | 175   | 0.007  | 0.86 |              |       |       |
| MIR939   | microRNA 939(MIR939)                              | NR_030635    | 137.4 | 183.9 | 0.0071 | 1.16 |              |       |       |
| KLF10    | Kruppel like factor 10(KLF10)                     | NM_005655    | 154.5 | 164.7 | 0.0072 | 0.78 |              |       |       |
| KLF10    | Kruppel like factor 10(KLF10)                     | NM_005655    | 192.8 | 164.2 | 0.0072 | 0.78 | NM_001009670 | 33.30 | 2.04  |
| PTK2     | protein tyrosine kinase 2(PTK2)                   | NM_153831    | 119   | 119.9 | 0.0072 | 0.9  |              |       |       |
| TMEM184C | transmembrane protein 184C(TMEM184C)              | NM_018241    | 110.5 | 106.7 | 0.0072 | 0.89 |              |       |       |
| TMEM184C | transmembrane protein 184C(TMEM184C)              | NM_018241    | 331.1 | 360.5 | 0.0072 | 0.89 |              |       |       |
| RNF146   | ring finger protein 146(RNF146)                   | NM_030963    | 117.2 | 104.6 | 0.0073 | 0.82 |              |       |       |
| RNF146   | ring finger protein 146(RNF146)                   | NM_030963    | 152.3 | 156.8 | 0.0073 | 0.82 |              |       |       |

|          |                                                                  |              |        |       |        |      |
|----------|------------------------------------------------------------------|--------------|--------|-------|--------|------|
| FAM174A  | family with sequence similarity 174 member A(FAM174A)            | NM_198507    | 283.1  | 227.5 | 0.0076 | 0.71 |
| SLC41A3  | solute carrier family 41 member 3(SLC41A3)                       | NM_001008485 | 612.9  | 375.5 | 0.0076 | 0.58 |
| TBC1D8B  | TBC1 domain family member 8B(TBC1D8B)                            | NM_017752    | 113.6  | 121.8 | 0.0076 | 0.81 |
| TBC1D8B  | TBC1 domain family member 8B(TBC1D8B)                            | NM_017752    | 176.8  | 157.7 | 0.0076 | 0.81 |
| RPL17P39 | ribosomal protein L17 pseudogene 39(RPL17P39)                    | NM_001093733 | 519.6  | 880.1 | 0.0078 | 1.57 |
| RRAGB    | Ras related GTP binding B(RRAGB)                                 | NM_006064    | 98.7   | 152.4 | 0.0079 | 1.36 |
| RRAGB    | Ras related GTP binding B(RRAGB)                                 | NM_006064    | 126.7  | 129.2 | 0.0079 | 1.36 |
| CNEP1R1  | CTD nuclear envelope phosphatase 1 regulatory subunit 1(CNEP1R1) | NM_153261    | 111.5  | 147.8 | 0.008  | 1.18 |
| ARHGAP1  | Rho GTPase activating protein 1(ARHGAP1)                         | NM_004308    | 1017.5 | 907.2 | 0.0081 | 0.83 |

|          |                                                   |              |         |        |        |      |
|----------|---------------------------------------------------|--------------|---------|--------|--------|------|
| ATP6V0D1 | ATPase H+ transporting V0 subunit d1(ATP6V0D1)    | NM_004691    | 430.6   | 338.6  | 0.0083 | 0.73 |
| GAPDH    | glyceraldehyde-3-phosphate dehydrogenase(GAPDH)   | NM_002046    | 142.9   | 141.5  | 0.0085 | 0.43 |
| GAPDH    | glyceraldehyde-3-phosphate dehydrogenase(GAPDH)   | NM_002046    | 1842.1  | 1026.5 | 0.0085 | 0.43 |
| GAPDH    | glyceraldehyde-3-phosphate dehydrogenase(GAPDH)   | NM_002046    | 3640.2  | 1836.1 | 0.0085 | 0.43 |
| TYMS     | thymidylate synthetase(TYMS)                      | NM_001071    | 113.5   | 232.8  | 0.0086 | 1.72 |
| FNTA     | farnesyltransferase, CAAX box, alpha(FNTA)        | NM_001018677 | 302.3   | 399.5  | 0.0089 | 1.21 |
| RPLP2    | ribosomal protein lateral stalk subunit P2(RPLP2) | NM_001004    | 10890.7 | 9676.9 | 0.009  | 0.66 |

|             |                                                                                               |                  |        |        |        |      |
|-------------|-----------------------------------------------------------------------------------------------|------------------|--------|--------|--------|------|
| HACE1       | HECT domain<br>and ankyrin<br>repeat containing<br>E3 ubiquitin<br>protein ligase<br>1(HACE1) | NM_02077<br>1    | 127.4  | 120.2  | 0.0091 | 0.86 |
| EIF1        | eukaryotic<br>translation<br>initiation factor<br>1(EIF1)                                     | NM_00580<br>1    | 1591.4 | 202.6  | 0.0093 | 0.12 |
| PTS         | 6-<br>pyruvoyltetrahydr<br>opterin<br>synthase(PTS)                                           | NM_00031<br>7    | 316.4  | 243.3  | 0.0093 | 0.67 |
| TFDP1       | transcription factor<br>Dp-1(TFDP1)                                                           | NM_00711<br>1    | 196.2  | 339.1  | 0.0093 | 1.52 |
| TFDP1       | transcription factor<br>Dp-1(TFDP1)                                                           | NM_00711<br>1    | 492.5  | 636.7  | 0.0093 | 1.52 |
|             |                                                                                               | XM_00171<br>8145 | 121.7  | 114.7  | 0.0094 | 0.86 |
|             |                                                                                               | XM_92722<br>8    | 109.4  | 137.4  | 0.0095 | 1.11 |
| HNRNP<br>H2 | heterogeneous<br>nuclear<br>ribonucleoprotein<br>H2<br>(H')(HNRNPH2)                          | NM_01959<br>7    | 293.3  | 236.1  | 0.0096 | 0.74 |
|             |                                                                                               | XM_93875<br>5    | 1571.1 | 2625.7 | 0.0097 | 1.49 |

|                  |                                                                     |                  |       |       |        |      |
|------------------|---------------------------------------------------------------------|------------------|-------|-------|--------|------|
| AP2M1            | adaptor related<br>protein complex 2<br>mu 1<br>subunit(AP2M1)      | NM_00406<br>8    | 126.6 | 119.3 | 0.0098 | 0.86 |
| AP2M1            | adaptor related<br>protein complex 2<br>mu 1<br>subunit(AP2M1)      | NM_00406<br>8    | 271   | 288.9 | 0.0098 | 0.86 |
| LOC105<br>377348 | uncharacterized<br>LOC105377348(L<br>OC105377348)                   | AK093356         | 153.6 | 138.2 | 0.0099 | 0.82 |
| STRAP            | serine/threonine<br>kinase receptor<br>associated<br>protein(STRAP) | NM_00717<br>8    | 186.5 | 321.8 | 0.01   | 1.5  |
| ANXA7            | annexin<br>A7(ANXA7)                                                | NM_00403<br>4    | 145   | 191.6 | 0.0101 | 2.02 |
| ANXA7            | annexin<br>A7(ANXA7)                                                | NM_00403<br>4    | 345.7 | 830.6 | 0.0101 | 2.02 |
| GHSR             | growth hormone<br>secretagogue<br>receptor(GHSR)                    | NM_00412<br>2    | 103.9 | 133.9 | 0.0101 | 1.13 |
| PSMD5            | proteasome 26S<br>subunit, non-<br>ATPase<br>5(PSMD5)               | NM_00504<br>7    | 163.1 | 234.6 | 0.0101 | 1.25 |
|                  |                                                                     | XM_00172<br>1968 | 107.3 | 141.8 | 0.0101 | 1.15 |

|         |                                                                   |              |        |        |        |      |
|---------|-------------------------------------------------------------------|--------------|--------|--------|--------|------|
| SDR42E1 | short chain dehydrogenase/reductase family 42E, member 1(SDR42E1) | NM_145168    | 119.6  | 119.1  | 0.0105 | 0.9  |
| ZBTB40  | zinc finger and BTB domain containing 40(ZBTB40)                  | NM_001083621 | 148    | 234.5  | 0.0106 | 1.36 |
|         |                                                                   | XM_001722060 | 469.6  | 1000.1 | 0.0108 | 1.96 |
|         |                                                                   | XM_939687    | 1087.7 | 1810   | 0.0108 | 1.56 |
| USE1    | unconventional SNARE in the ER 1(USE1)                            | NM_018467    | 148.9  | 131.6  | 0.011  | 0.81 |
|         |                                                                   | XM_944813    | 121.9  | 121.3  | 0.011  | 0.9  |
|         |                                                                   | XR_040895    | 136.4  | 182.2  | 0.011  | 1.16 |
|         |                                                                   | XR_017960    | 91.5   | 123    | 0.0111 | 1.22 |
| ACD     | adrenocortical dysplasia homolog(ACD)                             | NM_022914    | 137.6  | 185.5  | 0.0113 | 1.17 |
| ISG20L2 | interferon stimulated exonuclease gene 20 like 2(ISG20L2)         | NM_030980    | 144.8  | 199.4  | 0.0115 | 1.2  |

|          |                                                         |           |         |        |        |      |
|----------|---------------------------------------------------------|-----------|---------|--------|--------|------|
| RSRC2    | arginine and serine rich coiled-coil 2(RSRC2)           | NM_023012 | 121.6   | 144.5  | 0.0115 | 1.29 |
| RSRC2    | arginine and serine rich coiled-coil 2(RSRC2)           | NM_023012 | 656.4   | 918.9  | 0.0115 | 1.29 |
| C11orf74 | chromosome 11 open reading frame 74(C11orf74)           | NM_138787 | 216.8   | 185.6  | 0.0116 | 0.76 |
| PUM2     | pumilio RNA binding family member 2(PUM2)               | NM_015317 | 458.7   | 667.5  | 0.0118 | 1.33 |
| ANKRA2   | ankyrin repeat family A member 2(ANKRA2)                | NM_023039 | 116.8   | 150    | 0.012  | 1.14 |
| ANKRA2   | ankyrin repeat family A member 2(ANKRA2)                | NM_023039 | 177.1   | 229.6  | 0.012  | 1.14 |
| fxyd2    | FXYP domain containing ion transport regulator 2(FXYD2) | NM_001680 | 128.4   | 146.9  | 0.012  | 0.46 |
| fxyd2    | FXYP domain containing ion transport regulator 2(FXYD2) | NM_001680 | 12803.3 | 6710.8 | 0.012  | 0.46 |

| OTU    |                                                     |              |        |        |        |      |              |      |        |
|--------|-----------------------------------------------------|--------------|--------|--------|--------|------|--------------|------|--------|
| OTUB1  | deubiquitinase, ubiquitin aldehyde binding 1(OTUB1) | NR_003089    | 148.1  | 139.2  | 0.012  | 0.84 |              |      |        |
| MRAP2  | melanocortin 2 receptor accessory protein 2(MRAP2)  | NM_138409    | 141.4  | 116.5  | 0.0122 | 0.76 |              |      |        |
| MRAP2  | melanocortin 2 receptor accessory protein 2(MRAP2)  | NM_138409    | 161.3  | 174.9  | 0.0122 | 0.76 |              |      |        |
| RPS6   | ribosomal protein S6(RPS6)                          | NM_001010    | 2996.1 | 6286.2 | 0.0122 | 1.6  |              |      |        |
| RPS6   | ribosomal protein S6(RPS6)                          | NM_001010    | 6172   | 8646.3 | 0.0122 | 1.6  |              |      |        |
| TRIM36 | tripartite motif containing 36(TRIM36)              | NM_001017397 | 103.5  | 133    | 0.0122 | 1.14 |              |      |        |
| PNMA1  | paraneoplastic Ma antigen 1(PNMA1)                  | NM_006029    | 322.8  | 245.5  | 0.0123 | 0.7  |              |      |        |
| oxtr   | oxytocin receptor(OXTR)                             | NM_000916    | 118.9  | 112.8  | 0.0124 | 0.86 |              |      |        |
| PWWP2B | PWWP domain containing 2B(PWWP2B)                   | NM_138499    | 116.1  | 107    | 0.0128 | 0.84 | NM_001107943 | 0.63 | 112.77 |
| PWWP2B | PWWP domain containing 2B(PWWP2B)                   | NM_138499    | 143    | 161.6  | 0.0128 | 0.84 |              |      |        |



|         |                                                       |              |        |        |        |      |
|---------|-------------------------------------------------------|--------------|--------|--------|--------|------|
| FAM127B | family with sequence similarity 127 member B(FAM127B) | NM_001078172 | 157.9  | 178.2  | 0.0129 | 0.71 |
| FAM127B | family with sequence similarity 127 member B(FAM127B) | NM_001078172 | 299.4  | 236.3  | 0.0129 | 0.71 |
|         |                                                       | XM_001726456 | 115.4  | 155    | 0.0129 | 1.16 |
| GNG10   | G protein subunit gamma 10(GNG10)                     | NM_001017998 | 897.8  | 460.7  | 0.0131 | 0.53 |
| SLC25A4 | solute carrier family 25 member 4(SLC25A4)            | NM_001151    | 1239.8 | 632.8  | 0.0131 | 0.43 |
| SLC25A4 | solute carrier family 25 member 4(SLC25A4)            | NM_001151    | 2794.8 | 1377.6 | 0.0131 | 0.43 |
| GPATCH8 | G-patch domain containing 8(GPATCH8)                  | NM_001002909 | 120.3  | 158.8  | 0.0132 | 1.17 |
| STX8    | syntaxin 8(STX8)                                      | NM_004853    | 462.3  | 367.9  | 0.0133 | 0.71 |
|         |                                                       | XR_015954    | 126    | 195.4  | 0.0134 | 1.36 |
| MINK1   | misshapen like kinase 1(MINK1)                        | NM_153827    | 118.2  | 113.2  | 0.0135 | 0.87 |

|       |                                                    |              |       |       |        |      |           |       |      |
|-------|----------------------------------------------------|--------------|-------|-------|--------|------|-----------|-------|------|
| MINK1 | misshapen like kinase 1(MINK1)                     | NM_153827    | 118.7 | 138.1 | 0.0135 | 0.87 | NM_134372 | 22.51 | 0.03 |
| GPR34 | G protein-coupled receptor 34(GPR34)               | NM_001033513 | 123.6 | 167.1 | 0.0136 | 1.17 |           |       |      |
| MZB1  | marginal zone B and B1 cell specific protein(MZB1) | NM_016459    | 92.9  | 112   | 0.0136 | 2.51 |           |       |      |
| MZB1  | marginal zone B and B1 cell specific protein(MZB1) | NM_016459    | 179.2 | 514.5 | 0.0136 | 2.51 |           |       |      |
| PGA3  | pepsinogen 3, group I (pepsinogen A)(PGA3)         | NM_001079807 | 95.5  | 110.5 | 0.0137 | 1.17 |           |       |      |
| PGA3  | pepsinogen 3, group I (pepsinogen A)(PGA3)         | NM_001079807 | 110.8 | 120.2 | 0.0137 | 1.17 |           |       |      |
| PGA3  | pepsinogen 3, group I (pepsinogen A)(PGA3)         | NM_001079807 | 111.8 | 150.6 | 0.0137 | 1.17 |           |       |      |
|       |                                                    | XR_017249    | 103.6 | 146.2 | 0.0137 | 1.25 |           |       |      |

|           |                                                                    |              |       |       |        |      |
|-----------|--------------------------------------------------------------------|--------------|-------|-------|--------|------|
| CEACAM1   | carcinoembryonic antigen related cell adhesion molecule 1(CEACAM1) | NM_001712    | 120   | 110   | 0.0141 | 0.83 |
| GPRC5C    | G protein-coupled receptor class C group 5 member C(GPRC5C)        | NM_018653    | 427.4 | 290.7 | 0.0141 | 0.61 |
| LINC01278 | long intergenic non-protein coding RNA 1278(LINC01278)             | AK130294     | 290.9 | 239.4 | 0.0141 | 0.73 |
| BUB3      | BUB3, mitotic checkpoint protein(BUB3)                             | NM_004725    | 182.1 | 251.4 | 0.0142 | 1.73 |
| BUB3      | BUB3, mitotic checkpoint protein(BUB3)                             | NM_004725    | 261.4 | 499.8 | 0.0142 | 1.73 |
| LIG3      | DNA ligase 3(LIG3)                                                 | NM_013975    | 160.3 | 207.6 | 0.0143 | 1.12 |
| FAM96B    | family with sequence similarity 96 member B(FAM96B)                | NM_016062    | 415.4 | 361.1 | 0.0144 | 0.79 |
| RPL26P30  | ribosomal protein L26 pseudogene 30(RPL26P30)                      | NM_001093761 | 366.6 | 296   | 0.0145 | 0.73 |

|           |                                                       |              |        |        |        |      |              |            |
|-----------|-------------------------------------------------------|--------------|--------|--------|--------|------|--------------|------------|
| FAM127A   | family with sequence similarity 127 member A(FAM127A) | NM_001078171 | 363    | 277.5  | 0.0146 | 0.7  |              |            |
| GLS2      | glutaminase 2(GLS2)                                   | NM_013267    | 122    | 118.8  | 0.0146 | 0.89 |              |            |
| AKT3      | AKT serine/threonine kinase 3(AKT3)                   | NM_005465    | 91.9   | 117.9  | 0.0147 | 1.18 |              |            |
| OPRM1     | opioid receptor mu 1(OPRM1)                           | NM_001008505 | 116.7  | 144.5  | 0.0147 | 1.09 |              |            |
| OPRM1     | opioid receptor mu 1(OPRM1)                           | NM_001008505 | 177.5  | 216.2  | 0.0147 | 1.09 |              |            |
| RPL19P9   | ribosomal protein L19 pseudogene 9(RPL19P9)           | NM_001080544 | 429.2  | 660.6  | 0.0147 | 1.38 |              |            |
| RPL19P9   | ribosomal protein L19 pseudogene 9(RPL19P9)           | NM_001080544 | 4171.5 | 6597.3 | 0.0147 | 1.38 |              |            |
|           |                                                       | XM_001726945 | 106.8  | 105.8  | 0.0147 | 0.9  | NM_001031645 | 1.93 10.04 |
| RAB11FIP1 | RAB11 family interacting protein 1(RAB11FIP1)         | NM_001002814 | 459.8  | 697.6  | 0.0148 | 1.39 |              |            |
| E2F4      | E2F transcription factor 4(E2F4)                      | NM_001950    | 289.3  | 407.9  | 0.0149 | 1.27 |              |            |
|           |                                                       | XR_037945    | 99.3   | 139.2  | 0.0149 | 1.23 |              |            |

|              |                                                                 |                  |       |       |        |      |
|--------------|-----------------------------------------------------------------|------------------|-------|-------|--------|------|
| PHOSP<br>HO2 | phosphatase,<br>orphan<br>2(PHOSPHO2)                           | NM_00100<br>8489 | 299   | 208   | 0.015  | 0.65 |
| ADGRE<br>5   | adhesion G<br>protein-coupled<br>receptor<br>E5(ADGRE5)         | NM_07848<br>1    | 103.5 | 130.9 | 0.0155 | 1.12 |
| ADGRE<br>5   | adhesion G<br>protein-coupled<br>receptor<br>E5(ADGRE5)         | NM_07848<br>1    | 107.1 | 124.5 | 0.0155 | 1.12 |
|              |                                                                 | XM_00113<br>3677 | 94.8  | 106.4 | 0.0155 | 1.13 |
|              |                                                                 | XM_00113<br>3677 | 106.8 | 138.9 | 0.0155 | 1.13 |
|              |                                                                 | BM987531         | 112.8 | 142.2 | 0.0156 | 1.11 |
| FAM96A       | family with<br>sequence<br>similarity 96<br>member<br>A(FAM96A) | NM_03223<br>1    | 460   | 369.9 | 0.0157 | 0.75 |
| PLCD4        | phospholipase C<br>delta 4(PLCD4)                               | NM_03272<br>6    | 242   | 179.8 | 0.0158 | 0.65 |
| ASB8         | ankyrin repeat<br>and SOCS box<br>containing<br>8(ASB8)         | NM_02409<br>5    | 118.5 | 120   | 0.0159 | 0.91 |
| ASB8         | ankyrin repeat<br>and SOCS box<br>containing<br>8(ASB8)         | NM_02409<br>5    | 121.6 | 122.4 | 0.0159 | 0.91 |

|          |                                                                          |              |        |        |        |      |              |       |      |
|----------|--------------------------------------------------------------------------|--------------|--------|--------|--------|------|--------------|-------|------|
| P2RY2    | purinergic receptor P2Y2(P2RY2)                                          | NM_002564    | 185.8  | 141.2  | 0.0159 | 0.67 |              |       |      |
|          |                                                                          | XM_001723699 | 112.9  | 142.5  | 0.0159 | 1.12 | NM_144748    | 66.99 | 0.14 |
|          |                                                                          | XR_038699    | 1022.6 | 1448.6 | 0.0159 | 1.31 |              |       |      |
| ATP6V0E1 | ATPase H+ transporting V0 subunit e1(ATP6V0E1)                           | NM_003945    | 970.5  | 897.5  | 0.0162 | 0.85 |              |       |      |
| ATP6V0E1 | ATPase H+ transporting V0 subunit e1(ATP6V0E1)                           | NM_003945    | 1668.7 | 1759   | 0.0162 | 0.85 |              |       |      |
| GDI2     | GDP dissociation inhibitor 2(GDI2)                                       | NM_001494    | 146.7  | 216    | 0.0163 | 1.3  |              |       |      |
| MRPL20   | mitochondrial ribosomal protein L20(MRPL20)                              | NM_017971    | 482    | 407.1  | 0.0164 | 0.77 |              |       |      |
| ZNF622   | zinc finger protein 622(ZNF622)                                          | NM_033414    | 482    | 463.4  | 0.0164 | 0.87 |              |       |      |
|          |                                                                          | XM_001714310 | 100.6  | 126    | 0.0164 | 1.12 |              |       |      |
| STT3A    | STT3A, catalytic subunit of the oligosaccharyltransferase complex(STT3A) | NM_152713    | 482.8  | 723.5  | 0.0165 | 1.38 | NM_001107793 | 77.29 | 6.85 |
|          |                                                                          | XR_019270    | 119.8  | 157.2  | 0.0165 | 1.13 | NM_001107793 | 77.29 | 6.85 |

|              |                                                        |                  |        |        |        |      |                  |       |      |
|--------------|--------------------------------------------------------|------------------|--------|--------|--------|------|------------------|-------|------|
|              |                                                        | XR_03953<br>9    | 113.8  | 109.9  | 0.0165 | 0.88 | NM_0011<br>07793 | 77.29 | 6.85 |
| HOMER<br>2   | homer scaffolding<br>protein<br>2(HOMER2)              | NM_19933<br>2    | 212.4  | 171.6  | 0.0169 | 0.73 |                  |       |      |
| BTF3         | basic transcription<br>factor 3(BTF3)                  | NM_00120<br>7    | 1296.2 | 614.3  | 0.0172 | 0.49 |                  |       |      |
| SCARN<br>A20 | small Cajal body-<br>specific RNA<br>20(SCARNA20)      | NR_00299<br>9    | 104.2  | 131.7  | 0.0172 | 1.13 |                  |       |      |
| SNORA<br>1   | small nucleolar<br>RNA, H/ACA box<br>1(SNORA1)         | NR_00302<br>6    | 100.9  | 128.2  | 0.0173 | 1.14 |                  |       |      |
| PSMB11       | proteasome<br>subunit beta<br>11(PSMB11)               | NM_00109<br>9780 | 108.5  | 138.9  | 0.0178 | 1.13 |                  |       |      |
| STEAP2       | STEAP2<br>metalloreductase(<br>STEAP2)                 | NM_15299<br>9    | 127.7  | 115.4  | 0.0178 | 0.72 |                  |       |      |
| STEAP2       | STEAP2<br>metalloreductase(<br>STEAP2)                 | NM_15299<br>9    | 201.8  | 157.9  | 0.0178 | 0.72 |                  |       |      |
| GLMP         | glycosylated<br>lysosomal<br>membrane<br>protein(GLMP) | NM_14458<br>0    | 845.9  | 613.6  | 0.0179 | 0.66 |                  |       |      |
| CYBB         | cytochrome b-245<br>beta chain(CYBB)                   | NM_00039<br>7    | 106.7  | 152.9  | 0.0183 | 1.26 |                  |       |      |
| RPL14        | ribosomal protein<br>L14(RPL14)                        | NM_00103<br>4996 | 864.7  | 1435.9 | 0.0184 | 1.51 |                  |       |      |

|              |                                                             |                  |       |        |        |      |
|--------------|-------------------------------------------------------------|------------------|-------|--------|--------|------|
| TIGD6        | tigger<br>transposable<br>element derived<br>6(TIGD6)       | NM_03095<br>3    | 121.5 | 122.8  | 0.0184 | 0.91 |
| MRPL43       | mitochondrial<br>ribosomal protein<br>L43(MRPL43)           | NM_03211<br>2    | 496.5 | 372.2  | 0.0186 | 0.68 |
| MRPL43       | mitochondrial<br>ribosomal protein<br>L43(MRPL43)           | NM_03211<br>2    | 935.3 | 791.2  | 0.0186 | 0.68 |
| OXA1L        | OXA1L,<br>mitochondrial<br>inner membrane<br>protein(OXA1L) | NM_00501<br>5    | 738   | 478.1  | 0.0186 | 0.59 |
|              |                                                             | AI911349         | 136.7 | 183.5  | 0.0186 | 1.16 |
|              |                                                             | XR_03797<br>7    | 780.1 | 1280.1 | 0.0186 | 1.53 |
| ATG4B        | autophagy related<br>4B cysteine<br>peptidase(ATG4B<br>)    | NM_17832<br>6    | 173.9 | 164.2  | 0.0187 | 0.83 |
| HPX          | hemopexin(HPX)                                              | NM_00061<br>3    | 145.1 | 116.2  | 0.0187 | 0.72 |
| RAPGE<br>F1  | Rap guanine<br>nucleotide<br>exchange factor<br>1(RAPGEF1)  | NM_00531<br>2    | 136.4 | 177.8  | 0.0188 | 1.14 |
| DEFB10<br>3A | defensin beta<br>103A(DEFB103A)                             | NM_00108<br>1551 | 104   | 136.2  | 0.019  | 1.15 |



|              |                                                |           |       |       |        |      |
|--------------|------------------------------------------------|-----------|-------|-------|--------|------|
| DOLK         | dolichol kinase(DOLK)                          | NM_014908 | 218.9 | 191   | 0.019  | 0.8  |
| RAD51A<br>P1 | RAD51 associated protein 1(RAD51AP1)           | NM_006479 | 99.3  | 126.4 | 0.019  | 1.15 |
| RTN4IP<br>1  | reticulon 4 interacting protein 1(RTN4IP1)     | NM_032730 | 199.8 | 190.4 | 0.019  | 0.84 |
| METTL4       | methyltransferase like 4(METTL4)               | NM_022840 | 160.5 | 227.8 | 0.0191 | 1.21 |
| SERPIN<br>B1 | serpin family B member 1(SERPINB1)             | NM_030666 | 99.8  | 130.8 | 0.0192 | 1.16 |
|              |                                                | XM_934839 | 104   | 138.5 | 0.0192 | 1.17 |
| FGD1         | FYVE, RhoGEF and PH domain containing 1(FGD1)  | NM_004463 | 118.3 | 115.7 | 0.0193 | 0.88 |
| BCR          | BCR, RhoGEF and GTPase activating protein(BCR) | NM_004327 | 137   | 157.7 | 0.0196 | 0.74 |
| BCR          | BCR, RhoGEF and GTPase activating protein(BCR) | NM_004327 | 215.7 | 175.7 | 0.0196 | 0.74 |

|           |                                                               |              |        |        |        |      |             |       |      |
|-----------|---------------------------------------------------------------|--------------|--------|--------|--------|------|-------------|-------|------|
| LINC00544 | long intergenic non-protein coding RNA 544(LINC00544)         | NM_001099778 | 116    | 160.1  | 0.0196 | 1.2  |             |       |      |
|           |                                                               | XM_934553    | 100    | 124.9  | 0.0197 | 1.11 |             |       |      |
| MYH9      | myosin heavy chain 9(MYH9)                                    | NM_002473    | 806.9  | 2308.3 | 0.02   | 2.53 | NM_00109603 | 28.32 | 0.90 |
| MYH9      | myosin heavy chain 9(MYH9)                                    | NM_002473    | 2233.6 | 3165.4 | 0.02   | 2.53 |             |       |      |
|           |                                                               | XM_925919    | 112    | 108.5  | 0.02   | 0.88 |             |       |      |
| KCNJ13    | potassium voltage-gated channel subfamily J member 13(KCNJ13) | NM_002242    | 107.3  | 104.4  | 0.0201 | 0.89 |             |       |      |
| STXBP6    | syntaxin binding protein 6(STXBP6)                            | NM_014178    | 151.4  | 138.1  | 0.0201 | 0.82 |             |       |      |
|           |                                                               | XR_038898    | 160.3  | 250    | 0.0204 | 1.42 |             |       |      |
| ZNF684    | zinc finger protein 684(ZNF684)                               | NM_152373    | 97.3   | 127.8  | 0.0207 | 1.17 |             |       |      |
| Tas2r43   | taste 2 receptor member 43(TAS2R43)                           | NM_176884    | 113    | 110.3  | 0.0208 | 0.89 |             |       |      |
| TRAPP C13 | trafficking protein particle complex 13(TRAPPC13)             | NM_001093756 | 201.4  | 162.3  | 0.0209 | 0.72 |             |       |      |

|             |                                                           |               |       |        |        |      |
|-------------|-----------------------------------------------------------|---------------|-------|--------|--------|------|
|             |                                                           | BQ185080      | 112.1 | 145.6  | 0.0209 | 1.13 |
|             |                                                           | CR748464      | 101.1 | 127.6  | 0.0209 | 1.12 |
|             |                                                           | XR_01765<br>3 | 1485  | 2142.3 | 0.021  | 1.28 |
| ZFAND6      | zinc finger AN1-<br>type containing<br>6(ZFAND6)          | NM_01900<br>6 | 257.2 | 254.4  | 0.0212 | 0.75 |
| ZFAND6      | zinc finger AN1-<br>type containing<br>6(ZFAND6)          | NM_01900<br>6 | 509.7 | 405.2  | 0.0212 | 0.75 |
|             |                                                           | XR_01841<br>2 | 106.9 | 132.9  | 0.0213 | 1.11 |
| HERPU<br>D2 | HERPUD family<br>member<br>2(HERPUD2)                     | NM_02237<br>3 | 109.7 | 139.4  | 0.0214 | 1.13 |
| HERPU<br>D2 | HERPUD family<br>member<br>2(HERPUD2)                     | NM_02237<br>3 | 120.7 | 132.2  | 0.0214 | 1.13 |
| CMC1        | C-X9-C motif<br>containing<br>1(CMC1)                     | NM_18252<br>3 | 274.2 | 215.2  | 0.0217 | 0.69 |
| CLEC11<br>A | C-type lectin<br>domain family 11<br>member<br>A(CLEC11A) | NM_00297<br>5 | 176   | 156.4  | 0.0218 | 0.78 |
| TPI1P2      | triosephosphate<br>isomerase 1<br>pseudogene<br>2(TPI1P2) | NR_00218<br>7 | 143.8 | 133.8  | 0.0218 | 0.84 |

|          |                                                                   |           |       |       |        |      |
|----------|-------------------------------------------------------------------|-----------|-------|-------|--------|------|
| UQCC1    | ubiquinol-cytochrome c reductase complex assembly factor 1(UQCC1) | NM_199487 | 217.1 | 198.8 | 0.022  | 0.79 |
|          |                                                                   | DB299679  | 123.7 | 117.3 | 0.0223 | 0.86 |
| ADCK1    | aarF domain containing kinase 1(ADCK1)                            | NM_020421 | 153.3 | 150.7 | 0.0224 | 0.87 |
| SH3TC1   | SH3 domain and tetratricopeptide repeats 1(SH3TC1)                | NM_018986 | 539.6 | 360.7 | 0.0224 | 0.62 |
| ANGEL1   | angel homolog 1(ANGEL1)                                           | NM_015305 | 166.5 | 276   | 0.0226 | 1.45 |
| MACROD1  | MACRO domain containing 1(MACROD1)                                | NM_014067 | 552.7 | 291.7 | 0.0226 | 0.5  |
| TMEM185A | transmembrane protein 185A(TMEM185A)                              | NM_032508 | 144.5 | 162.4 | 0.0227 | 0.83 |
| TMEM185A | transmembrane protein 185A(TMEM185A)                              | NM_032508 | 200.1 | 184.3 | 0.0227 | 0.83 |
| PSMF1    | proteasome inhibitor subunit 1(PSMF1)                             | NM_178579 | 377.6 | 336.1 | 0.0228 | 0.79 |

|             |                                                                   |                  |       |       |        |      |
|-------------|-------------------------------------------------------------------|------------------|-------|-------|--------|------|
|             |                                                                   | XM_49590<br>9    | 105.7 | 134.6 | 0.0228 | 1.14 |
| csnk1g3     | casein kinase 1<br>gamma<br>3(CSNK1G3)                            | NM_00103<br>1812 | 142.5 | 190.8 | 0.0229 | 1.17 |
| ZNF385<br>C | zinc finger protein<br>385C(ZNF385C)                              | NM_00101<br>3624 | 146.1 | 209.7 | 0.0229 | 1.23 |
|             |                                                                   | XM_94207<br>1    | 137.4 | 190.7 | 0.0229 | 1.21 |
| NOTUM       | NOTUM,<br>palmitoleoyl-<br>protein<br>carboxylesterase(<br>NOTUM) | NM_17849<br>3    | 113.6 | 115   | 0.023  | 0.91 |
| RPAIN       | RPA interacting<br>protein(RPAIN)                                 | NM_00103<br>3002 | 326.6 | 295.8 | 0.023  | 0.8  |
| CHRNA<br>6  | cholinergic<br>receptor nicotinic<br>alpha 6<br>subunit(CHRNA6)   | NM_00419<br>8    | 114.7 | 107.6 | 0.0232 | 0.86 |
| GORAS<br>P1 | golgi reassembly<br>stacking protein<br>1(GORASP1)                | NM_03189<br>9    | 169.5 | 129.7 | 0.0236 | 0.71 |
|             |                                                                   | XM_00172<br>5669 | 640.4 | 415.7 | 0.0237 | 0.61 |
| EPB41L<br>1 | erythrocyte<br>membrane protein<br>band 4.1 like<br>1(EPB41L1)    | NM_01215<br>6    | 326.1 | 273.9 | 0.024  | 0.74 |

|            |                                                   |                  |        |        |        |      |
|------------|---------------------------------------------------|------------------|--------|--------|--------|------|
|            |                                                   | XM_92623<br>1    | 156.3  | 244.2  | 0.024  | 1.38 |
| ARCN1      | archain<br>1(ARCN1)                               | NM_00165<br>5    | 305    | 433.4  | 0.0241 | 1.29 |
| ARRDC<br>4 | arrestin domain<br>containing<br>4(ARRDC4)        | NM_18337<br>6    | 90.1   | 120.7  | 0.0241 | 1.21 |
|            |                                                   | XR_01638<br>5    | 258.3  | 386.7  | 0.0241 | 1.35 |
| RPL32      | ribosomal protein<br>L32(RPL32)                   | NM_00100<br>7074 | 102.7  | 118.6  | 0.0242 | 1.59 |
| RPL32      | ribosomal protein<br>L32(RPL32)                   | NM_00100<br>7074 | 1495.3 | 2663.2 | 0.0242 | 1.59 |
| SPACA9     | sperm acrosome<br>associated<br>9(SPACA9)         | NM_01895<br>6    | 157.3  | 159.6  | 0.0242 | 0.89 |
| BBC3       | BCL2 binding<br>component<br>3(BBC3)              | NM_01441<br>7    | 180.4  | 179.1  | 0.0245 | 0.89 |
| LYPD6      | LY6/PLAUR<br>domain<br>containing<br>6(LYPD6)     | NM_19431<br>7    | 98.1   | 121.9  | 0.0245 | 1.13 |
|            |                                                   | AW665973         | 268.9  | 505.5  | 0.0246 | 1.58 |
| ADAT1      | adenosine<br>deaminase, tRNA<br>specific 1(ADAT1) | NM_01209<br>1    | 116.9  | 118.7  | 0.0249 | 0.92 |
| CTSF       | cathepsin<br>F(CTSF)                              | NM_00379<br>3    | 559.1  | 489.3  | 0.0249 | 0.81 |

|                |                                                          |           |        |        |        |      |
|----------------|----------------------------------------------------------|-----------|--------|--------|--------|------|
| PTPN3          | protein tyrosine phosphatase, non-receptor type 3(PTPN3) | NM_002829 | 338.6  | 222.4  | 0.0251 | 0.6  |
| PDGFA          | platelet derived growth factor subunit A(PDGFA)          | NM_033023 | 167.2  | 149.9  | 0.0252 | 0.8  |
|                |                                                          | XR_016832 | 153.2  | 224.8  | 0.0252 | 1.28 |
| NDUFA11        | NADH:ubiquinone oxidoreductase subunit A11(NDUFA11)      | NM_175614 | 1766.9 | 1305.1 | 0.0254 | 0.67 |
| PLA1A          | phospholipase A1 member A(PLA1A)                         | NM_015900 | 349.7  | 213.4  | 0.0254 | 0.57 |
| TMEM189-UBE2V1 | TMEM189-UBE2V1 readthrough(TM189-UBE2V1)                 | NM_003349 | 236.2  | 171.9  | 0.0254 | 0.69 |
| MRPL34         | mitochondrial ribosomal protein L34(MRPL34)              | NM_023937 | 399.5  | 384.9  | 0.0256 | 0.87 |
| PSMC1          | proteasome 26S subunit, ATPase 1(PSMC1)                  | NM_002802 | 1659.8 | 1339.7 | 0.0256 | 0.73 |
| PSMC1          | proteasome 26S subunit, ATPase 1(PSMC1)                  | NM_002802 | 1673.9 | 1645.6 | 0.0256 | 0.73 |

|         |                                                                 |              |         |        |        |      |
|---------|-----------------------------------------------------------------|--------------|---------|--------|--------|------|
| SIRPG   | signal regulatory protein gamma(SIRPG)                          | NM_001039508 | 102.8   | 157.2  | 0.0256 | 1.33 |
| CHCHD6  | coiled-coil-helix-coiled-coil-helix domain containing 6(CHCHD6) | NM_032343    | 302.2   | 248.4  | 0.0259 | 0.73 |
| fgl1    | fibrinogen like 1(FGL1)                                         | NM_201553    | 167.9   | 119.9  | 0.0259 | 0.65 |
|         |                                                                 | XM_944079    | 122.9   | 164.4  | 0.026  | 1.16 |
| Cox411  | cytochrome c oxidase subunit 411(COX411)                        | NM_001861    | 10161.5 | 7591.4 | 0.0261 | 0.63 |
| FAM131B | family with sequence similarity 131 member B(FAM131B)           | NM_014690    | 107.2   | 134.9  | 0.0261 | 1.11 |
| HSPBP1  | HSPA (Hsp70) binding protein 1(HSPBP1)                          | NM_012267    | 110.4   | 114.8  | 0.0261 | 0.87 |
| HSPBP1  | HSPA (Hsp70) binding protein 1(HSPBP1)                          | NM_012267    | 121.7   | 115.7  | 0.0261 | 0.87 |
| TCEA3   | transcription elongation factor A3(TCEA3)                       | NM_003196    | 704.6   | 419.6  | 0.0261 | 0.53 |



|              |                                                                                 |                  |        |        |        |      |
|--------------|---------------------------------------------------------------------------------|------------------|--------|--------|--------|------|
| RTFDC1       | replication<br>termination factor<br>2 domain<br>containing<br>1(RTFDC1)        | NM_01640<br>7    | 474.5  | 421.8  | 0.0262 | 0.79 |
| TRAF4        | TNF receptor<br>associated factor<br>4(TRAF4)                                   | NM_00429<br>5    | 117.9  | 112.6  | 0.0262 | 0.87 |
| ALDOA        | aldolase, fructose-<br>bisphosphate<br>A(ALDOA)                                 | NM_18404<br>3    | 4490.9 | 1955.6 | 0.0263 | 0.36 |
|              |                                                                                 | XM_94514<br>8    | 123.5  | 162.6  | 0.0263 | 1.16 |
|              |                                                                                 | XR_01942<br>9    | 141.7  | 241.6  | 0.0264 | 1.51 |
| GLUD1        | glutamate<br>dehydrogenase<br>1(GLUD1)                                          | NM_00527<br>1    | 111.9  | 110.9  | 0.0265 | 0.9  |
| PIGL         | phosphatidylinosit<br>ol glycan anchor<br>biosynthesis class<br>L(PIGL)         | NM_00427<br>8    | 104.4  | 128.1  | 0.0265 | 1.1  |
| ANKS1B       | ankyrin repeat<br>and sterile alpha<br>motif domain<br>containing<br>1B(ANKS1B) | NM_02014<br>0    | 112.3  | 111    | 0.0266 | 0.91 |
| slc35e2<br>b | solute carrier<br>family 35 member<br>E2B(SLC35E2B)                             | NM_00111<br>0781 | 118.7  | 155    | 0.0267 | 1.15 |
|              |                                                                                 | AK002088         | 91.1   | 116.5  | 0.0267 | 1.15 |

|             |                                                                |                  |       |       |        |      |               |      |       |
|-------------|----------------------------------------------------------------|------------------|-------|-------|--------|------|---------------|------|-------|
| MSMO1       | methylsterol<br>monooxygenase<br>1(MSMO1)                      | NM_00101<br>7369 | 108.3 | 108.6 | 0.0268 | 0.91 |               |      |       |
| MSMO1       | methylsterol<br>monooxygenase<br>1(MSMO1)                      | NM_00101<br>7369 | 177.3 | 230.5 | 0.0268 | 0.91 |               |      |       |
|             |                                                                | NR_00325<br>2    | 153.5 | 152.5 | 0.0268 | 0.88 |               |      |       |
|             |                                                                | XM_92659<br>0    | 99.3  | 128.8 | 0.0268 | 1.17 |               |      |       |
| GC          | GC, vitamin D<br>binding<br>protein(GC)                        | NM_00058<br>3    | 172   | 110.3 | 0.027  | 0.58 |               |      |       |
| ESRRA<br>P2 | estrogen-related<br>receptor alpha<br>pseudogene<br>2(ESRRAP2) | NR_00003<br>3    | 430.1 | 343.1 | 0.0271 | 0.71 |               |      |       |
| SEH1L       | SEH1 like<br>nucleoporin(SEH<br>1L)                            | NM_00101<br>3437 | 149   | 209.3 | 0.0271 | 1.25 |               |      |       |
| SEH1L       | SEH1 like<br>nucleoporin(SEH<br>1L)                            | NM_00101<br>3437 | 245.1 | 273.8 | 0.0271 | 1.25 | NM_1447<br>44 | 0.11 | 40.01 |
|             |                                                                | XM_00172<br>7022 | 145.8 | 132.9 | 0.0271 | 0.83 |               |      |       |
| GORAB       | golgin, RAB6<br>interacting(GORA<br>B)                         | NM_15228<br>1    | 114.4 | 140.1 | 0.0272 | 1.09 |               |      |       |
| CORO2<br>B  | coronin<br>2B(CORO2B)                                          | NM_00609<br>1    | 102.2 | 114.1 | 0.0273 | 0.83 |               |      |       |

|             |                                                                                           |                  |       |       |        |      |
|-------------|-------------------------------------------------------------------------------------------|------------------|-------|-------|--------|------|
| CORO2<br>B  | coronin<br>2B(CORO2B)                                                                     | NM_00609<br>1    | 124   | 113.4 | 0.0273 | 0.83 |
| TMEM2<br>06 | transmembrane<br>protein<br>206(TMEM206)                                                  | NM_01825<br>2    | 105.7 | 98.3  | 0.0274 | 0.86 |
|             |                                                                                           | XM_94096<br>2    | 170   | 155.8 | 0.0274 | 0.82 |
| CCDC1<br>06 | coiled-coil domain<br>containing<br>106(CCDC106)                                          | NM_01330<br>1    | 349   | 317.4 | 0.0276 | 0.81 |
|             |                                                                                           | XM_00172<br>0172 | 494.9 | 722   | 0.0276 | 1.33 |
| JADE1       | jade family PHD<br>finger 1(JADE1)                                                        | NM_02490<br>0    | 215   | 199   | 0.0277 | 0.82 |
| ZRANB1      | zinc finger<br>RANBP2-type<br>containing<br>1(ZRANB1)                                     | NM_01758<br>0    | 156   | 154.2 | 0.0277 | 0.87 |
| DNAJC2<br>7 | DnaJ heat shock<br>protein family<br>(Hsp40) member<br>C27(DNAJC27)                       | NM_01654<br>4    | 297.1 | 260.3 | 0.0278 | 0.76 |
|             |                                                                                           | XM_00171<br>4755 | 167.8 | 136.1 | 0.0278 | 0.73 |
| ICAM4       | intercellular<br>adhesion<br>molecule 4<br>(Landsteiner-<br>Wiener blood<br>group)(ICAM4) | NM_02237<br>7    | 112.3 | 107.3 | 0.028  | 0.88 |

|              |                                                                             |               |        |        |        |      |
|--------------|-----------------------------------------------------------------------------|---------------|--------|--------|--------|------|
|              |                                                                             | XR_03860<br>2 | 1134.2 | 1738.1 | 0.0282 | 1.42 |
| HOXD3        | homeobox<br>D3(HOXD3)                                                       | NM_00689<br>8 | 203.3  | 175.7  | 0.0285 | 0.79 |
| SERPIN<br>C1 | serpin family C<br>member<br>1(SERPINC1)                                    | NM_00048<br>8 | 329.7  | 175.3  | 0.0285 | 0.46 |
| LIN7B        | lin-7 homolog B,<br>crumbs cell<br>polarity complex<br>component(LIN7B<br>) | NM_02216<br>5 | 140.9  | 131.4  | 0.0287 | 0.82 |
| HOXA11       | homeobox<br>A11(HOXA11)                                                     | NM_00552<br>3 | 109    | 131.5  | 0.0288 | 1.08 |
| PDGFB        | platelet derived<br>growth factor<br>subunit B(PDGFB)                       | NM_03301<br>6 | 126.5  | 123.4  | 0.0288 | 0.88 |
| CYB561<br>A3 | cytochrome b561<br>family member<br>A3(CYB561A3)                            | NM_15361<br>1 | 201.9  | 405.9  | 0.0289 | 1.77 |
| KREME<br>N2  | kringle containing<br>transmembrane<br>protein<br>2(KREMEN2)                | NM_02450<br>7 | 113.8  | 111.5  | 0.0291 | 0.89 |
| PAXIP1       | PAX interacting<br>protein 1(PAXIP1)                                        | NM_00734<br>9 | 171.7  | 237.5  | 0.0292 | 1.21 |
| TMEM6<br>7   | transmembrane<br>protein<br>67(TMEM67)                                      | NM_15370<br>4 | 116.7  | 111.4  | 0.0292 | 0.88 |

|         |                                              |              |       |       |        |      |
|---------|----------------------------------------------|--------------|-------|-------|--------|------|
| CADM4   | cell adhesion molecule 4(CADM4)              | NM_145296    | 330.3 | 222.6 | 0.0293 | 0.63 |
|         |                                              | XM_944183    | 114.3 | 138.9 | 0.0294 | 1.08 |
| IGSF9B  | immunoglobulin superfamily member 9B(IGSF9B) | NM_014987    | 111.1 | 141.8 | 0.0295 | 1.13 |
| PLAA    | phospholipase A2 activating protein(PLAA)    | NM_001031689 | 91.5  | 118.1 | 0.0295 | 1.16 |
| PLAA    | phospholipase A2 activating protein(PLAA)    | NM_001031689 | 114.9 | 126.3 | 0.0295 | 1.16 |
| SNX11   | sorting nexin 11(SNX11)                      | NM_152244    | 376   | 508   | 0.0295 | 1.21 |
| PLBD2   | phospholipase B domain containing 2(PLBD2)   | NM_173542    | 224   | 210.6 | 0.0296 | 0.84 |
| TUBA3FP | tubulin alpha 3f pseudogene(TUBA3FP)         | NR_003608    | 120.7 | 122.8 | 0.0296 | 0.91 |
| CENPA   | centromere protein A(CENPA)                  | NM_001042426 | 98.7  | 122.8 | 0.0297 | 1.14 |
| CENPA   | centromere protein A(CENPA)                  | NM_001042426 | 104.5 | 135.1 | 0.0297 | 1.14 |

|              |                                                      |               |        |        |        |      |
|--------------|------------------------------------------------------|---------------|--------|--------|--------|------|
|              |                                                      | XR_01926<br>7 | 129.8  | 178.9  | 0.0297 | 1.19 |
| SLC26A<br>10 | solute carrier<br>family 26 member<br>10(SLC26A10)   | NM_13348<br>9 | 110.1  | 99.9   | 0.0298 | 0.84 |
| SLC26A<br>10 | solute carrier<br>family 26 member<br>10(SLC26A10)   | NM_13348<br>9 | 125.5  | 144.5  | 0.0298 | 0.84 |
| SRP14        | signal recognition<br>particle<br>14(SRP14)          | NM_00313<br>4 | 257.6  | 405.8  | 0.03   | 0.72 |
| SRP14        | signal recognition<br>particle<br>14(SRP14)          | NM_00313<br>4 | 4633.3 | 3832.9 | 0.03   | 0.72 |
| hamp         | hepcidin<br>antimicrobial<br>peptide(HAMP)           | NM_02117<br>5 | 136.1  | 129.4  | 0.0301 | 0.84 |
| KIF16B       | kinesin family<br>member<br>16B(KIF16B)              | NM_02470<br>4 | 111.6  | 111.5  | 0.0302 | 0.81 |
| KIF16B       | kinesin family<br>member<br>16B(KIF16B)              | NM_02470<br>4 | 136.6  | 123.9  | 0.0302 | 0.81 |
| MAN1C<br>1   | mannosidase<br>alpha class 1C<br>member<br>1(MAN1C1) | NM_02037<br>9 | 589.2  | 269    | 0.0302 | 0.41 |
| DDX19A       | DEAD-box<br>helicase<br>19A(DDX19A)                  | NM_01833<br>2 | 119    | 127.9  | 0.0303 | 1.17 |

|        |                                                                           |              |        |        |        |      |
|--------|---------------------------------------------------------------------------|--------------|--------|--------|--------|------|
| DDX19A | DEAD-box helicase 19A(DDX19A)                                             | NM_018332    | 261.7  | 346.5  | 0.0303 | 1.17 |
| SSTR3  | somatostatin receptor 3(SSTR3)                                            | NM_001051    | 107.6  | 105.6  | 0.0303 | 0.9  |
| ATP5J  | ATP synthase, H+ transporting, mitochondrial Fo complex subunit F6(ATP5J) | NM_001003701 | 4092.1 | 3324.4 | 0.0304 | 0.69 |
|        |                                                                           | AA658833     | 108    | 104.5  | 0.0304 | 0.89 |
|        |                                                                           | BM684558     | 101.2  | 128.4  | 0.0304 | 1.12 |
| ASAH1  | N-acylsphingosine amidohydrolase 1(ASAH1)                                 | NM_177924    | 122.3  | 125.4  | 0.0307 | 0.92 |
| PSMB5  | proteasome subunit beta 5(PSMB5)                                          | NM_002797    | 1255.4 | 1083.9 | 0.0307 | 0.78 |
| RRAGD  | Ras related GTP binding D(RRAGD)                                          | NM_021244    | 219.1  | 161.2  | 0.0307 | 0.68 |
| SARM1  | sterile alpha and TIR motif containing 1(SARM1)                           | NM_015077    | 106.1  | 131.7  | 0.0308 | 1.1  |
|        |                                                                           | XR_038738    | 230.6  | 359.9  | 0.0308 | 1.41 |

|       |                                                  |           |       |       |        |      |
|-------|--------------------------------------------------|-----------|-------|-------|--------|------|
| DDAH2 | dimethylarginine dimethylaminohydrolase 2(DDAH2) | NM_013974 | 244.6 | 204.9 | 0.031  | 0.76 |
| DTD2  | D-tyrosyl-tRNA deacylase 2 (putative)(DTD2)      | NM_080664 | 119.2 | 112   | 0.031  | 0.84 |
| NME6  | NME/NM23 nucleoside diphosphate kinase 6(NME6)   | NM_005793 | 114.3 | 147.2 | 0.031  | 1.13 |
| NME6  | NME/NM23 nucleoside diphosphate kinase 6(NME6)   | NM_005793 | 139.1 | 168.6 | 0.031  | 1.13 |
|       |                                                  | XR_015351 | 120   | 119.9 | 0.0312 | 0.89 |
| NMRK2 | nicotinamide riboside kinase 2(NMRK2)            | NM_170678 | 104   | 92.5  | 0.0313 | 0.83 |
| NMRK2 | nicotinamide riboside kinase 2(NMRK2)            | NM_170678 | 118.8 | 123.2 | 0.0313 | 0.83 |
| PDE6H | phosphodiesterase 6H(PDE6H)                      | NM_006205 | 82.4  | 113.1 | 0.0313 | 1.2  |
| MED31 | mediator complex subunit 31(MED31)               | NM_016060 | 441.8 | 405.1 | 0.0314 | 0.83 |
|       |                                                  | XM_935907 | 416.3 | 658.5 | 0.0314 | 1.48 |



|             |                                                              |               |       |       |        |      |
|-------------|--------------------------------------------------------------|---------------|-------|-------|--------|------|
| CCDC8<br>5C | coiled-coil domain<br>containing<br>85C(CCDC85C)             | AK123840      | 368.8 | 309.1 | 0.0316 | 0.73 |
| PRMT6       | protein arginine<br>methyltransferase<br>6(PRMT6)            | NM_01813<br>7 | 177.1 | 161.2 | 0.0316 | 0.81 |
| PRMT6       | protein arginine<br>methyltransferase<br>6(PRMT6)            | NM_01813<br>7 | 212.6 | 203.4 | 0.0316 | 0.81 |
| ARSD        | arylsulfatase<br>D(ARSD)                                     | NM_00166<br>9 | 970.1 | 728.8 | 0.0318 | 0.68 |
|             |                                                              | XR_01749<br>8 | 151.5 | 232.3 | 0.0318 | 1.35 |
|             |                                                              | XR_01749<br>8 | 458.5 | 519.2 | 0.0318 | 1.35 |
| EFHD1       | EF-hand domain<br>family member<br>D1(EFHD1)                 | NM_02520<br>2 | 600   | 427.1 | 0.0319 | 0.66 |
| N4BP1       | NEDD4 binding<br>protein 1(N4BP1)                            | NM_15302<br>9 | 142.1 | 198.4 | 0.0319 | 1.2  |
| UNC5C       | unc-5 netrin<br>receptor<br>C(UNC5C)                         | NM_00372<br>8 | 110.8 | 111.9 | 0.0319 | 0.91 |
| AUH         | AU RNA binding<br>methylglutaconyl-<br>CoA<br>hydratase(AUH) | NM_00169<br>8 | 505.3 | 369.1 | 0.032  | 0.67 |
| CFDP1       | craniofacial<br>development<br>protein 1(CFDP1)              | NM_00632<br>4 | 889.4 | 731.3 | 0.032  | 0.77 |

|        |                                                        |           |       |        |        |      |
|--------|--------------------------------------------------------|-----------|-------|--------|--------|------|
| TIMM23 | translocase of inner mitochondrial membrane 23(TIMM23) | NM_006327 | 154.6 | 176    | 0.032  | 0.72 |
| TIMM23 | translocase of inner mitochondrial membrane 23(TIMM23) | NM_006327 | 419.4 | 365.1  | 0.032  | 0.72 |
| TIMM23 | translocase of inner mitochondrial membrane 23(TIMM23) | NM_006327 | 932.1 | 729.9  | 0.032  | 0.72 |
| TIMM23 | translocase of inner mitochondrial membrane 23(TIMM23) | NM_006327 | 1595  | 1344.1 | 0.032  | 0.72 |
| FAM26D | family with sequence similarity 26 member D(FAM26D)    | NM_153036 | 101.6 | 118.4  | 0.0325 | 1.09 |
| FAM26D | family with sequence similarity 26 member D(FAM26D)    | NM_153036 | 112.3 | 139.5  | 0.0325 | 1.09 |

|         |                                                         |              |       |       |        |      |
|---------|---------------------------------------------------------|--------------|-------|-------|--------|------|
| OR4D6   | olfactory receptor family 4 subfamily D member 6(OR4D6) | NM_001004708 | 126.5 | 161.3 | 0.0325 | 1.12 |
| coa1    | cytochrome c oxidase assembly factor 1 homolog(COA1)    | NM_018224    | 193.7 | 177.5 | 0.0326 | 0.8  |
| FBXL6   | F-box and leucine rich repeat protein 6(FBXL6)          | NM_012162    | 147.7 | 191.4 | 0.0326 | 1.13 |
|         |                                                         | XM_001723545 | 108.1 | 135.1 | 0.0326 | 1.1  |
| NDRG2   | NDRG family member 2(NDRG2)                             | NM_201539    | 700   | 431.8 | 0.0327 | 0.57 |
| RBM10   | RNA binding motif protein 10(RBM10)                     | NM_152856    | 345.5 | 461.1 | 0.0329 | 1.24 |
| ttl5    | tubulin tyrosine ligase like 5(TTLL5)                   | NM_015072    | 179.7 | 252.8 | 0.0329 | 1.23 |
| PPIP5K1 | diphosphoinositol pentakisphosphate kinase 1(PPIP5K1)   | NM_001024463 | 200.4 | 194   | 0.033  | 0.85 |
| nr0b1   | nuclear receptor subfamily 0 group B member 1(NR0B1)    | NM_000475    | 108.5 | 96.6  | 0.0331 | 0.83 |

|             |                                                                             |                  |        |        |        |      |
|-------------|-----------------------------------------------------------------------------|------------------|--------|--------|--------|------|
|             |                                                                             | XR_01642<br>4    | 2184.7 | 3530.7 | 0.0331 | 1.33 |
| TMEM1<br>63 | transmembrane<br>protein<br>163(TMEM163)                                    | NM_03092<br>3    | 138.5  | 191.9  | 0.0333 | 1.21 |
| ERI1        | exoribonuclease<br>1(ERI1)                                                  | NM_15333<br>2    | 159.9  | 208.2  | 0.0334 | 1.14 |
| BTF3        | basic transcription<br>factor 3(BTF3)                                       | NM_00103<br>7637 | 2422.2 | 1588.4 | 0.0335 | 0.61 |
| TCERG<br>1  | transcription<br>elongation<br>regulator<br>1(TCERG1)                       | NM_00670<br>6    | 113.3  | 127.8  | 0.0336 | 1.21 |
| TCERG<br>1  | transcription<br>elongation<br>regulator<br>1(TCERG1)                       | NM_00670<br>6    | 181.5  | 250.2  | 0.0336 | 1.21 |
| TPPP3       | tubulin<br>polymerization<br>promoting protein<br>family member<br>3(TPPP3) | NM_01596<br>4    | 116    | 112.2  | 0.0336 | 0.89 |
|             |                                                                             | XM_94266<br>9    | 679.3  | 1229.2 | 0.0338 | 1.73 |
|             |                                                                             | XR_01681<br>3    | 114.1  | 155.6  | 0.0338 | 1.2  |
| CDC123      | cell division cycle<br>123(CDC123)                                          | NM_00602<br>3    | 169.5  | 259.4  | 0.0339 | 1.37 |
|             |                                                                             | AI024182         | 128.9  | 126.5  | 0.034  | 0.88 |

|             |                                                       |               |       |       |        |      |               |       |      |
|-------------|-------------------------------------------------------|---------------|-------|-------|--------|------|---------------|-------|------|
| MSI2        | musashi RNA binding protein 2(MSI2)                   | NM_13896<br>2 | 111.3 | 117.6 | 0.0341 | 0.84 |               |       |      |
| MSI2        | musashi RNA binding protein 2(MSI2)                   | NM_13896<br>2 | 188.6 | 182.9 | 0.0341 | 0.84 |               |       |      |
|             |                                                       | XR_01736<br>6 | 106.1 | 139   | 0.0342 | 1.14 |               |       |      |
| GIN1        | gypsy retrotransposon integrase 1(GIN1)               | NM_01767<br>6 | 119.6 | 123.6 | 0.0343 | 0.83 |               |       |      |
| GIN1        | gypsy retrotransposon integrase 1(GIN1)               | NM_01767<br>6 | 146.4 | 132.4 | 0.0343 | 0.83 |               |       |      |
|             |                                                       | XM_92689<br>8 | 134.4 | 172.2 | 0.0345 | 1.11 | NM_0171<br>96 | 14.73 | 0.69 |
|             |                                                       | XR_01603<br>6 | 194.9 | 302.4 | 0.0347 | 1.37 | NM_0171<br>96 | 14.73 | 0.69 |
|             |                                                       | XR_01525<br>5 | 105.7 | 147.3 | 0.0349 | 1.23 | NM_0171<br>96 | 14.73 | 0.69 |
|             |                                                       | XR_01561<br>1 | 139.9 | 213.1 | 0.0349 | 1.34 |               |       |      |
| APOO        | apolipoprotein O(APOO)                                | NM_02412<br>2 | 648.6 | 459.8 | 0.035  | 0.65 |               |       |      |
| Fam129<br>c | family with sequence similarity 129 member C(FAM129C) | NM_17354<br>4 | 111.1 | 141.3 | 0.0351 | 1.12 |               |       |      |

|        |                                                   |              |        |       |        |      |           |      |       |
|--------|---------------------------------------------------|--------------|--------|-------|--------|------|-----------|------|-------|
| FNDC5  | fibronectin type III domain containing 5(FNDC5)   | NM_153756    | 233.1  | 143.2 | 0.0351 | 0.55 | NM_031356 | 5.43 | 24.53 |
| PFKM   | phosphofructokinase, muscle(PFKM)                 | NM_000289    | 1167.2 | 418.7 | 0.0351 | 0.32 | NM_031356 | 5.43 | 24.53 |
|        |                                                   | CR605357     | 135.1  | 133   | 0.0351 | 0.88 |           |      |       |
| CA10   | carbonic anhydrase 10(CA10)                       | NM_020178    | 125.5  | 118.9 | 0.0354 | 0.86 |           |      |       |
| DPPA2  | developmental pluripotency associated 2(DPPA2)    | NM_138815    | 114.9  | 155.5 | 0.0354 | 1.17 |           |      |       |
| SYNGR1 | synaptogyrin 1(SYNGR1)                            | NM_004711    | 135.2  | 123   | 0.0354 | 0.83 |           |      |       |
| DRC3   | dynein regulatory complex subunit 3(DRC3)         | NM_031294    | 127.7  | 113.6 | 0.0355 | 0.81 |           |      |       |
| NDUFA1 | NADH:ubiquinone oxidoreductase subunit A1(NDUFA1) | NM_004541    | 1004.1 | 723.3 | 0.0355 | 0.65 |           |      |       |
| TSEN34 | tRNA splicing endonuclease subunit 34(TSEN34)     | NM_001077446 | 123.2  | 139.1 | 0.0355 | 0.78 |           |      |       |

|        |                                                                 |              |        |        |        |      |           |            |
|--------|-----------------------------------------------------------------|--------------|--------|--------|--------|------|-----------|------------|
| TSEN34 | tRNA splicing endonuclease subunit 34(TSEN34)                   | NM_001077446 | 1078.5 | 938.7  | 0.0355 | 0.78 |           |            |
|        |                                                                 | XM_927955    | 4868.5 | 3764.5 | 0.0356 | 0.67 |           |            |
|        |                                                                 | AW364673     | 134.6  | 122.6  | 0.0357 | 0.83 |           |            |
|        |                                                                 | XR_017072    | 119.2  | 177.6  | 0.0357 | 1.28 |           |            |
| CLIP4  | CAP-Gly domain containing linker protein family member 4(CLIP4) | NM_024692    | 249.4  | 222.4  | 0.0359 | 0.79 |           |            |
| SAYSD1 | SAYSVFN motif domain containing 1(SAYSD1)                       | NM_018322    | 94.6   | 119.8  | 0.0359 | 1.13 |           |            |
| ANKRD9 | ankyrin repeat domain 9(ANKRD9)                                 | NM_152326    | 107.3  | 115.4  | 0.036  | 0.67 |           |            |
| ANKRD9 | ankyrin repeat domain 9(ANKRD9)                                 | NM_152326    | 317    | 230    | 0.036  | 0.67 | NM_017135 | 41.45 2.88 |
| STYX   | serine/threonine/tyrosine interacting protein(STYX)             | NM_145251    | 109.1  | 110.1  | 0.0364 | 0.91 | NM_017135 | 41.45 2.88 |
|        |                                                                 | XM_209824    | 111    | 135.6  | 0.0365 | 1.08 | NM_017135 | 41.45 2.88 |

|         |                                                            |           |       |       |        |      |              |       |      |
|---------|------------------------------------------------------------|-----------|-------|-------|--------|------|--------------|-------|------|
| PTPN20  | protein tyrosine phosphatase, non-receptor type 20(PTPN20) | NM_015605 | 101.9 | 128.9 | 0.0366 | 1.11 | NM_017135    | 41.45 | 2.88 |
| NTRK3   | neurotrophic receptor tyrosine kinase 3(NTRK3)             | NM_002530 | 102.8 | 123.3 | 0.0367 | 1.08 |              |       |      |
| TNFAIP1 | TNF alpha induced protein 1(TNFAIP1)                       | NM_021137 | 171.2 | 263.4 | 0.0367 | 1.35 |              |       |      |
|         |                                                            | XM_934518 | 126.6 | 171.7 | 0.0367 | 1.17 |              |       |      |
| BYSL    | bystin like(BYSL)                                          | NM_004053 | 114.8 | 154.9 | 0.0369 | 1.17 |              |       |      |
| CCDC177 | coiled-coil domain containing 177(CCDC177)                 | NM_020181 | 100.9 | 131.6 | 0.0369 | 1.14 |              |       |      |
| USP38   | ubiquitin specific peptidase 38(USP38)                     | NM_032557 | 126   | 115   | 0.0369 | 0.83 |              |       |      |
|         |                                                            | NR_031743 | 108.4 | 138.9 | 0.0369 | 1.13 | NM_001033653 | 43.46 | 1.56 |
| TM2D1   | TM2 domain containing 1(TM2D1)                             | NM_032027 | 155.4 | 193.9 | 0.0374 | 0.81 |              |       |      |
| TM2D1   | TM2 domain containing 1(TM2D1)                             | NM_032027 | 202   | 178.1 | 0.0374 | 0.81 |              |       |      |



|          |                                                       |           |        |        |        |      |
|----------|-------------------------------------------------------|-----------|--------|--------|--------|------|
| Cox7a1   | cytochrome c oxidase subunit 7A1(COX7A1)              | NM_001864 | 710.5  | 487.2  | 0.0375 | 0.62 |
|          |                                                       | XM_372926 | 2409.2 | 4504.4 | 0.0375 | 1.49 |
| MGEA5    | meningioma expressed antigen 5 (hyaluronidase)(MGEA5) | NM_012215 | 109.8  | 143.7  | 0.0376 | 1.14 |
| PIAS2    | protein inhibitor of activated STAT 2(PIAS2)          | NM_004671 | 115.3  | 126.3  | 0.0376 | 0.87 |
| PIAS2    | protein inhibitor of activated STAT 2(PIAS2)          | NM_004671 | 160.8  | 157.4  | 0.0376 | 0.87 |
| TUBBP6   | tubulin beta class I pseudogene 6(TUBBP6)             | NR_003598 | 110.7  | 143.4  | 0.0376 | 1.13 |
|          |                                                       | XM_928996 | 116.4  | 146.6  | 0.0376 | 1.1  |
| CLASP1   | cytoplasmic linker associated protein 1(CLASP1)       | NM_015282 | 422.7  | 357.9  | 0.0378 | 0.75 |
| RPL36    | ribosomal protein L36(RPL36)                          | NM_033643 | 1083.6 | 1757.7 | 0.038  | 1.41 |
| TNFRSF19 | TNF receptor superfamily member 19(TNFRSF19)          | NM_018647 | 117.1  | 111.3  | 0.038  | 0.85 |

|       |                                                                 |               |       |        |        |      |               |             |
|-------|-----------------------------------------------------------------|---------------|-------|--------|--------|------|---------------|-------------|
|       |                                                                 | XM_37427<br>6 | 109.5 | 105    | 0.038  | 0.88 |               |             |
|       |                                                                 | XR_01826<br>1 | 655.9 | 1141.9 | 0.038  | 1.54 |               |             |
| PPTC7 | PTC7 protein phosphatase homolog(PPTC7)                         | NM_13928<br>3 | 282   | 240    | 0.0381 | 0.75 |               |             |
| ACAP2 | ArfGAP with coiled-coil, ankyrin repeat and PH domains 2(ACAP2) | NM_01228<br>7 | 118.4 | 164.3  | 0.0382 | 1.34 |               |             |
| ACAP2 | ArfGAP with coiled-coil, ankyrin repeat and PH domains 2(ACAP2) | NM_01228<br>7 | 126.2 | 170.7  | 0.0382 | 1.34 |               |             |
| ACAP2 | ArfGAP with coiled-coil, ankyrin repeat and PH domains 2(ACAP2) | NM_01228<br>7 | 157.8 | 242.1  | 0.0382 | 1.34 |               |             |
|       |                                                                 | XM_37742<br>6 | 115.4 | 206.1  | 0.0382 | 1.56 |               |             |
| STMN1 | stathmin 1(STMN1)                                               | NM_20340<br>1 | 102.2 | 147.4  | 0.0384 | 1.26 |               |             |
|       |                                                                 | XM_92942<br>7 | 141.3 | 190.2  | 0.0384 | 1.16 |               |             |
| KEAP1 | kelch like ECH associated protein 1(KEAP1)                      | NM_01228<br>9 | 249.4 | 238.4  | 0.0387 | 0.8  | NM_1344<br>07 | 50.47 11.16 |

|        |                                                                        |           |        |        |        |      |
|--------|------------------------------------------------------------------------|-----------|--------|--------|--------|------|
| KEAP1  | kelch like ECH associated protein 1(KEAP1)                             | NM_012289 | 329.6  | 296.7  | 0.0387 | 0.8  |
|        |                                                                        | XR_038871 | 541.3  | 964.7  | 0.0389 | 1.62 |
| YIF1B  | Yip1 interacting factor homolog B, membrane trafficking protein(YIF1B) | NM_033557 | 124    | 125.9  | 0.039  | 0.91 |
| ZFP82  | ZFP82 zinc finger protein(ZFP82)                                       | NM_133466 | 125.4  | 162    | 0.039  | 1.12 |
|        |                                                                        | AW780096  | 100.2  | 119    | 0.039  | 1.08 |
|        |                                                                        | XR_016632 | 716    | 1233   | 0.039  | 1.62 |
|        |                                                                        | XR_038356 | 129    | 195.1  | 0.0391 | 1.28 |
| NDUFB8 | NADH:ubiquinone oxidoreductase subunit B8(NDUFB8)                      | NM_005004 | 5604.2 | 4470.4 | 0.0396 | 0.68 |
| NCBP1  | nuclear cap binding protein subunit 1(NCBP1)                           | NM_002486 | 292.3  | 382.8  | 0.0397 | 1.21 |
| PDS5A  | PDS5 cohesin associated factor A(PDS5A)                                | NM_015200 | 104.4  | 132.4  | 0.0398 | 1.14 |
|        |                                                                        | XR_039693 | 147.7  | 224.7  | 0.0398 | 1.34 |

|        |                                                                     |           |       |       |        |      |              |            |
|--------|---------------------------------------------------------------------|-----------|-------|-------|--------|------|--------------|------------|
| CDC6   | cell division cycle 6(CDC6)                                         | NM_001254 | 106.1 | 136.6 | 0.0399 | 1.13 |              |            |
| GATB   | glutamyl-tRNA amidotransferase subunit B(GATB)                      | NM_004564 | 200.2 | 184.2 | 0.0401 | 0.82 |              |            |
| MBTPS1 | membrane bound transcription factor peptidase, site 1(MBTPS1)       | NM_003791 | 195.7 | 210.8 | 0.0402 | 1.19 |              |            |
| MBTPS1 | membrane bound transcription factor peptidase, site 1(MBTPS1)       | NM_003791 | 197.7 | 264.4 | 0.0402 | 1.19 |              |            |
| UBR3   | ubiquitin protein ligase E3 component n-recognin 3 (putative)(UBR3) | NM_172070 | 199.2 | 199.1 | 0.0403 | 0.85 |              |            |
| UBR3   | ubiquitin protein ligase E3 component n-recognin 3 (putative)(UBR3) | NM_172070 | 220.9 | 211.2 | 0.0403 | 0.85 | NM_001033706 | 2.42 10.86 |
| BRD1   | bromodomain containing 1(BRD1)                                      | NM_014577 | 143.5 | 190.5 | 0.0404 | 1.16 |              |            |

|           |                                                                         |              |       |       |        |      |           |        |       |
|-----------|-------------------------------------------------------------------------|--------------|-------|-------|--------|------|-----------|--------|-------|
| TRPM4     | transient receptor potential cation channel subfamily M member 4(TRPM4) | NM_017636    | 366.4 | 255.3 | 0.0404 | 0.61 |           |        |       |
| CDK12     | cyclin dependent kinase 12(CDK12)                                       | NM_016507    | 217.3 | 498.7 | 0.0405 | 2.02 |           |        |       |
| ZDHHC17   | zinc finger DHHC-type containing 17(ZDHHC17)                            | NM_015336    | 95.9  | 121.1 | 0.0405 | 1.13 |           |        |       |
|           |                                                                         | NM_001080831 | 145.7 | 206.3 | 0.0405 | 1.23 |           |        |       |
| TRAF3IP2  | TRAF3 interacting protein 2(TRAF3IP2)                                   | NM_147686    | 392.8 | 312.2 | 0.0406 | 0.71 | NM_153300 | 0.14   | 61.17 |
| SIGLEC17P | sialic acid binding Ig like lectin 17, pseudogene(SIGLEC17P)            | NR_002804    | 128.8 | 166.5 | 0.0407 | 1.12 |           |        |       |
| TMEM208   | transmembrane protein 208(TMEM208)                                      | NM_014187    | 250.3 | 237.5 | 0.0407 | 0.85 | NM_032416 | 108.51 | 1.87  |
| TMEM208   | transmembrane protein 208(TMEM208)                                      | NM_014187    | 299.6 | 302   | 0.0407 | 0.85 |           |        |       |
| Znf763    | zinc finger protein 763(ZNF763)                                         | NM_001012753 | 106.5 | 151.7 | 0.0407 | 1.23 |           |        |       |

|         |                                                        |           |       |       |        |      |
|---------|--------------------------------------------------------|-----------|-------|-------|--------|------|
| EI24    | EI24, autophagy associated transmembrane protein(EI24) | NM_004879 | 206.8 | 173.7 | 0.0408 | 0.78 |
| CCNDBP1 | cyclin D1 binding protein 1(CCNDP1)                    | NM_012142 | 163.9 | 152.5 | 0.0409 | 0.83 |
| josp2   | Josephin domain containing 2(JOSD2)                    | NM_138334 | 120.2 | 117.2 | 0.0409 | 0.88 |
| NDRG4   | NDRG family member 4(NDRG4)                            | NM_020465 | 117.7 | 128.3 | 0.041  | 0.9  |
| NDRG4   | NDRG family member 4(NDRG4)                            | NM_020465 | 119.4 | 120.7 | 0.041  | 0.9  |
| SAFB2   | scaffold attachment factor B2(SAFB2)                   | NM_014649 | 124.3 | 136.7 | 0.041  | 1.25 |
| SAFB2   | scaffold attachment factor B2(SAFB2)                   | NM_014649 | 653.9 | 894.6 | 0.041  | 1.25 |
| FGF18   | fibroblast growth factor 18(FGF18)                     | NM_003862 | 119.7 | 120.1 | 0.0412 | 0.91 |
| APIP    | APAF1 interacting protein(APIP)                        | NM_015957 | 198.8 | 200.5 | 0.0413 | 0.76 |
| APIP    | APAF1 interacting protein(APIP)                        | NM_015957 | 350.3 | 301.3 | 0.0413 | 0.76 |

|        |                                                           |           |        |        |        |      |              |         |      |
|--------|-----------------------------------------------------------|-----------|--------|--------|--------|------|--------------|---------|------|
| CCT6P1 | chaperonin containing TCP1 subunit 6 pseudogene 1(CCT6P1) | NR_003110 | 508.4  | 644.7  | 0.0413 | 1.16 | NM_001191088 | 10.07   | 0.03 |
|        |                                                           | XM_938599 | 503.5  | 827.3  | 0.0413 | 1.52 | NM_001191088 | 10.07   | 0.03 |
| ESD    | esterase D(ESD)                                           | NM_001984 | 247.8  | 204.4  | 0.0414 | 0.72 |              |         |      |
| ESD    | esterase D(ESD)                                           | NM_001984 | 1970.5 | 1884.5 | 0.0414 | 0.72 |              |         |      |
| MRPS33 | mitochondrial ribosomal protein S33(MRPS33)               | NM_016071 | 126.7  | 116.9  | 0.0414 | 0.84 |              |         |      |
| MRPS33 | mitochondrial ribosomal protein S33(MRPS33)               | NM_016071 | 318.9  | 316.3  | 0.0414 | 0.84 | NM_012496    | 1095.39 | 8.76 |
| MXD1   | MAX dimerization protein 1(MXD1)                          | NM_002357 | 118.3  | 150.4  | 0.0414 | 1.1  |              |         |      |
| SKP2   | S-phase kinase associated protein 2(SKP2)                 | NM_032637 | 103.7  | 135.7  | 0.0414 | 1.16 |              |         |      |
| CTLA4  | cytotoxic T-lymphocyte associated protein 4(CTLA4)        | NM_005214 | 108    | 156.4  | 0.0415 | 1.27 |              |         |      |
| LMOD3  | leiomodlin 3(LMOD3)                                       | NM_198271 | 658.6  | 1079.3 | 0.0415 | 1.53 |              |         |      |

|        |                                                           |              |        |       |        |      |
|--------|-----------------------------------------------------------|--------------|--------|-------|--------|------|
| P4HA1  | prolyl 4-hydroxylase subunit alpha 1(P4HA1)               | NM_000917    | 125.8  | 126.1 | 0.0415 | 0.9  |
| PON3   | paraoxonase 3(PON3)                                       | NM_000940    | 111.4  | 105.6 | 0.0415 | 0.87 |
| RANBP3 | RAN binding protein 3(RANBP3)                             | NM_003624    | 103.6  | 130.3 | 0.0415 | 1.11 |
| RANBP3 | RAN binding protein 3(RANBP3)                             | NM_003624    | 105.5  | 132.3 | 0.0415 | 1.11 |
| MTFR1L | mitochondrial fission regulator 1 like(MTFR1L)            | NM_019557    | 193.3  | 171.3 | 0.0416 | 0.8  |
|        |                                                           | CN479898     | 136.7  | 129.1 | 0.0416 | 0.86 |
|        |                                                           | XM_001719755 | 116.7  | 150.2 | 0.0416 | 1.13 |
| DCAF6  | DDB1 and CUL4 associated factor 6(DCAF6)                  | NM_001017977 | 156.4  | 135.3 | 0.0418 | 0.79 |
| DCAF6  | DDB1 and CUL4 associated factor 6(DCAF6)                  | NM_001017977 | 1084.1 | 931.7 | 0.0418 | 0.79 |
| TPR    | translocated promoter region, nuclear basket protein(TPR) | NM_003292    | 357.6  | 500.3 | 0.042  | 1.25 |
|        |                                                           | XM_940014    | 117.3  | 114.8 | 0.0422 | 0.89 |



|        |                                                              |              |        |        |        |      |
|--------|--------------------------------------------------------------|--------------|--------|--------|--------|------|
| MCM7   | minichromosome maintenance complex component 7(MCM7)         | NM_005916    | 107.5  | 138.9  | 0.0423 | 1.14 |
| MYL6B  | myosin light chain 6B(MYL6B)                                 | NM_002475    | 1326.3 | 797.2  | 0.0423 | 0.57 |
| PPARA  | peroxisome proliferator activated receptor alpha(PPARA)      | NM_001001928 | 143    | 136.8  | 0.0423 | 0.85 |
| MICU1  | mitochondrial calcium uptake 1(MICU1)                        | NM_006077    | 273.1  | 227    | 0.0424 | 0.72 |
| ORC1   | origin recognition complex subunit 1(ORC1)                   | NM_004153    | 126.5  | 163.1  | 0.0424 | 1.13 |
| GLRX5  | glutaredoxin 5(GLRX5)                                        | NM_016417    | 3240.7 | 2238.3 | 0.0425 | 0.62 |
| PIH1D1 | PIH1 domain containing 1(PIH1D1)                             | NM_017916    | 236.8  | 216.1  | 0.0425 | 0.8  |
| SDHA   | succinate dehydrogenase complex flavoprotein subunit A(SDHA) | NM_004168    | 722    | 712.9  | 0.0425 | 0.51 |

|          |                                                                 |              |       |       |        |      |
|----------|-----------------------------------------------------------------|--------------|-------|-------|--------|------|
| SDHA     | succinate dehydrogenase complex flavoprotein subunit A(SDHA)    | NM_004168    | 744.3 | 418   | 0.0425 | 0.51 |
|          |                                                                 | XR_037304    | 109.2 | 101.7 | 0.0425 | 0.86 |
| KDELR1   | KDEL endoplasmic reticulum protein retention receptor 1(KDELR1) | NM_006801    | 130.8 | 170.7 | 0.0427 | 1.13 |
| PJA1     | praja ring finger ubiquitin ligase 1(PJA1)                      | NM_001032396 | 205.6 | 177.3 | 0.0428 | 0.78 |
| CHMP4B   | charged multivesicular body protein 4B(CHMP4B)                  | NM_176812    | 465.5 | 415.2 | 0.0429 | 0.8  |
| FGA      | fibrinogen alpha chain(FGA)                                     | NM_000508    | 113.1 | 106.4 | 0.0429 | 0.87 |
| MAPKB P1 | mitogen-activated protein kinase binding protein 1(MAPKBP1)     | NM_014994    | 107.3 | 134   | 0.043  | 1.11 |
| polr2m   | RNA polymerase II subunit M(POLR2M)                             | NM_001018102 | 106.2 | 116.4 | 0.043  | 0.82 |
| polr2m   | RNA polymerase II subunit M(POLR2M)                             | NM_001018102 | 127.1 | 112.7 | 0.043  | 0.82 |

|         |                                                      |              |         |         |        |      |           |            |
|---------|------------------------------------------------------|--------------|---------|---------|--------|------|-----------|------------|
| TIMM9   | translocase of inner mitochondrial membrane 9(TIMM9) | NM_012460    | 271.6   | 254.4   | 0.043  | 0.84 |           |            |
| UNQ6494 | uncharacterized LOC100129066(UNQ6494)                | NR_024280    | 107     | 133.4   | 0.043  | 1.11 |           |            |
|         |                                                      | XM_001719035 | 364.6   | 522.4   | 0.043  | 1.36 |           |            |
|         |                                                      | XR_039704    | 101.7   | 132.1   | 0.043  | 1.15 |           |            |
| CFAP69  | cilia and flagella associated protein 69(CFAP69)     | NM_001039706 | 171.7   | 153.9   | 0.0431 | 0.82 | NM_013059 | 21.02 0.11 |
| PALM    | paralemmin(PALM)                                     | NM_002579    | 107.5   | 113.4   | 0.0431 | 0.61 |           |            |
| PALM    | paralemmin(PALM)                                     | NM_002579    | 244     | 218.2   | 0.0431 | 0.61 |           |            |
| PALM    | paralemmin(PALM)                                     | NM_002579    | 1139.7  | 756.9   | 0.0431 | 0.61 |           |            |
| TMSB4X  | thymosin beta 4, X-linked(TMSB4X)                    | NM_021109    | 139.5   | 266.2   | 0.0432 | 1.73 |           |            |
| TMSB4X  | thymosin beta 4, X-linked(TMSB4X)                    | NM_021109    | 16760.5 | 17031.2 | 0.0432 | 1.73 |           |            |
|         |                                                      | AA193588     | 125.4   | 163.4   | 0.0433 | 1.13 |           |            |
|         |                                                      | XM_933938    | 99.3    | 127.8   | 0.0434 | 1.14 |           |            |

|            |                                                      |              |        |        |        |      |           |            |
|------------|------------------------------------------------------|--------------|--------|--------|--------|------|-----------|------------|
| KIAA0586   | KIAA0586(KIAA0586)                                   | NM_014749    | 118.7  | 117.6  | 0.0435 | 0.89 |           |            |
| PARP16     | poly(ADP-ribose) polymerase family member 16(PARP16) | NM_017851    | 104.2  | 135.5  | 0.0435 | 1.16 |           |            |
| PEX7       | peroxisomal biogenesis factor 7(PEX7)                | NM_000288    | 278.2  | 256.5  | 0.0436 | 0.83 |           |            |
| FAM122A    | family with sequence similarity 122A(FAM122A)        | NM_138333    | 105.7  | 129.6  | 0.0437 | 1.09 |           |            |
| pnkd       | paroxysmal nonkinesigenic dyskinesia(PNKD)           | NM_015488    | 245.6  | 174.8  | 0.0438 | 0.65 | NM_012816 | 19.78 2.28 |
| RPL32P18   | ribosomal protein L32 pseudogene 18(RPL32P18)        | NM_001090027 | 1617.9 | 2874.7 | 0.0438 | 1.48 | NM_012816 | 19.78 2.28 |
| ZC3H18-AS1 | ZC3H18 antisense RNA 1 (head to head)(ZC3H18-AS1)    | NM_001001682 | 103.9  | 127.5  | 0.0438 | 1.1  |           |            |
|            |                                                      | XM_927868    | 845.1  | 653.3  | 0.0438 | 0.72 |           |            |
| CDK18      | cyclin dependent kinase 18(CDK18)                    | NM_212503    | 151.1  | 146.7  | 0.0439 | 0.85 |           |            |

|              |                                                              |               |        |       |        |      |
|--------------|--------------------------------------------------------------|---------------|--------|-------|--------|------|
| FREM2        | FRAS1 related<br>extracellular<br>matrix protein<br>2(FREM2) | NM_20736<br>1 | 117.9  | 104.5 | 0.044  | 0.81 |
| MRPL11       | mitochondrial<br>ribosomal protein<br>L11(MRPL11)            | NM_01605<br>0 | 541.9  | 488.5 | 0.0441 | 0.83 |
|              |                                                              | AI183825      | 117.1  | 117.5 | 0.0441 | 0.9  |
| ANAPC<br>15  | anaphase<br>promoting<br>complex subunit<br>15(ANAPC15)      | NM_01404<br>2 | 187.5  | 160.1 | 0.0442 | 0.75 |
| APOA2        | apolipoprotein<br>A2(APOA2)                                  | NM_00164<br>3 | 157.9  | 104.6 | 0.0442 | 0.6  |
| KIAA155<br>1 | KIAA1551(KIAA15<br>51)                                       | NM_01816<br>9 | 96.6   | 136.8 | 0.0442 | 1.24 |
| KIAA155<br>1 | KIAA1551(KIAA15<br>51)                                       | NM_01816<br>9 | 100.5  | 119.9 | 0.0442 | 1.24 |
| PPIL6        | peptidylprolyl<br>isomerase like<br>6(PPIL6)                 | NM_17367<br>2 | 112.6  | 103.3 | 0.0442 | 0.84 |
|              |                                                              | XR_01802<br>0 | 106.7  | 134.1 | 0.0442 | 1.11 |
| ADAM8        | ADAM<br>metallopeptidase<br>domain<br>8(ADAM8)               | NM_00110<br>9 | 92.3   | 121.7 | 0.0443 | 1.16 |
| GOT2         | glutamic-<br>oxaloacetic<br>transaminase<br>2(GOT2)          | NM_00208<br>0 | 1233.7 | 865.2 | 0.0443 | 0.65 |

|        |                                                      |              |       |       |        |      |           |      |       |
|--------|------------------------------------------------------|--------------|-------|-------|--------|------|-----------|------|-------|
| RFX5   | regulatory factor X5(RFX5)<br>RNA                    | NM_001025603 | 106.6 | 141.5 | 0.0443 | 1.17 |           |      |       |
| RPUSD3 | pseudouridylate synthase domain containing 3(RPUSD3) | NM_173659    | 260   | 249.8 | 0.0443 | 0.84 |           |      |       |
| HAX1   | HCLS1 associated protein X-1(HAX1)                   | NM_006118    | 138.7 | 135.6 | 0.0444 | 0.88 |           |      |       |
| HAX1   | HCLS1 associated protein X-1(HAX1)                   | NM_006118    | 334.7 | 354.8 | 0.0444 | 0.88 |           |      |       |
| ACTR3  | ARP3 actin related protein 3 homolog(ACTR3)          | NM_005721    | 162.5 | 310.8 | 0.0445 | 1.71 | NM_031544 | 4.79 | 38.59 |
|        |                                                      | XM_001713657 | 730   | 488.3 | 0.0445 | 0.62 | NM_031544 | 4.79 | 38.59 |
|        |                                                      | XM_371878    | 91.6  | 116.4 | 0.0445 | 1.14 |           |      |       |
| FAM45A | family with sequence similarity 45 member A(FAM45A)  | NM_207009    | 117.1 | 110.3 | 0.0446 | 0.84 |           |      |       |

|         |                                                          |              |       |       |        |      |
|---------|----------------------------------------------------------|--------------|-------|-------|--------|------|
| HAR1B   | highly accelerated region 1B (non-protein coding)(HAR1B) | NR_003245    | 111.9 | 141   | 0.0447 | 1.11 |
| PRKRIP1 | PRKR interacting protein 1 (IL11 inducible)(PRKRIP1)     | NM_024653    | 123.9 | 157   | 0.0447 | 1.11 |
| USP33   | ubiquitin specific peptidase 33(USP33)                   | NM_201624    | 104.6 | 101   | 0.0447 | 0.89 |
| RRP1B   | ribosomal RNA processing 1B(RRP1B)                       | NM_015056    | 109.3 | 104.6 | 0.0448 | 0.87 |
|         |                                                          | XM_001724539 | 453.1 | 729.2 | 0.0448 | 1.51 |
|         |                                                          | XR_016197    | 81.4  | 120.8 | 0.0448 | 1.29 |
| CDC45   | cell division cycle 45(CDC45)                            | NM_003504    | 86.1  | 134.6 | 0.0449 | 1.35 |
| FGG     | fibrinogen gamma chain(FGG)                              | NM_000509    | 188.8 | 101.8 | 0.0449 | 0.48 |
| GPR89B  | G protein-coupled receptor 89B(GPR89B)                   | NM_016334    | 150.5 | 138.8 | 0.045  | 0.85 |
|         |                                                          | AW014327     | 106.7 | 136.9 | 0.045  | 1.12 |
|         |                                                          | XM_928029    | 152.5 | 153.4 | 0.045  | 0.89 |

|             |                                                                                             |                  |        |        |        |      |
|-------------|---------------------------------------------------------------------------------------------|------------------|--------|--------|--------|------|
| CCDC2<br>8B | coiled-coil domain<br>containing<br>28B(CCDC28B)                                            | NM_02429<br>6    | 119.7  | 125.2  | 0.0451 | 0.88 |
| CCDC2<br>8B | coiled-coil domain<br>containing<br>28B(CCDC28B)                                            | NM_02429<br>6    | 140.9  | 139.9  | 0.0451 | 0.88 |
| CD8A        | CD8a<br>molecule(CD8A)                                                                      | NM_00176<br>8    | 115.5  | 169.7  | 0.0451 | 1.29 |
|             |                                                                                             | XR_01673<br>2    | 2595.4 | 4667.1 | 0.0451 | 1.4  |
|             |                                                                                             | XM_00171<br>4765 | 114.2  | 111.8  | 0.0453 | 0.9  |
| MPRIP       | myosin<br>phosphatase Rho<br>interacting<br>protein(MPRIP)                                  | NM_20127<br>4    | 195    | 166.4  | 0.0454 | 0.78 |
| Uqcrrs1     | ubiquinol-<br>cytochrome c<br>reductase, Rieske<br>iron-sulfur<br>polypeptide<br>1(UQCRFS1) | NM_00600<br>3    | 4410.4 | 3323   | 0.0455 | 0.66 |
| COPA        | coatamer protein<br>complex subunit<br>alpha(COPA)                                          | NM_00437<br>1    | 233.5  | 325.7  | 0.0456 | 1.25 |
| PPP1CA      | protein<br>phosphatase 1<br>catalytic subunit<br>alpha(PPP1CA)                              | NM_00270<br>8    | 121.5  | 125.2  | 0.0456 | 0.92 |



|         |                                            |              |        |        |        |      |
|---------|--------------------------------------------|--------------|--------|--------|--------|------|
|         |                                            | AW028158     | 101    | 131.2  | 0.0457 | 1.15 |
|         |                                            | XM_001128975 | 160.9  | 212.8  | 0.0457 | 1.15 |
| SLC26A8 | solute carrier family 26 member 8(SLC26A8) | NM_052961    | 126.3  | 167.9  | 0.0458 | 1.16 |
|         |                                            | XM_940853    | 111.7  | 110.7  | 0.0458 | 0.91 |
| CEBPZ   | CCAAT/enhancer binding protein zeta(CEBPZ) | NM_005760    | 446.1  | 598.6  | 0.0461 | 1.23 |
|         |                                            | XM_001719341 | 1141.8 | 2040.2 | 0.0462 | 1.61 |
|         |                                            | XR_039643    | 131.7  | 193.8  | 0.0462 | 1.3  |
|         |                                            | XM_001126676 | 127.7  | 125    | 0.0463 | 0.88 |
|         |                                            | XR_040489    | 121.9  | 125.3  | 0.0463 | 0.91 |
| ANTXR1  | anthrax toxin receptor 1(ANTXR1)           | NM_032208    | 167.3  | 277.1  | 0.0464 | 1.51 |
|         |                                            | XM_927511    | 107.3  | 128.4  | 0.0464 | 1.07 |
|         |                                            | XM_001717905 | 120    | 150.6  | 0.0465 | 1.1  |
| DPH2    | DPH2 homolog(DPH2)                         | NM_001384    | 169.1  | 165.1  | 0.0466 | 0.87 |
| DUSP13  | dual specificity phosphatase 13(DUSP13)    | NM_016364    | 141.4  | 115.6  | 0.0466 | 0.73 |

|              |                                                                      |                  |       |        |        |      |
|--------------|----------------------------------------------------------------------|------------------|-------|--------|--------|------|
| DUSP13       | dual specificity<br>phosphatase<br>13(DUSP13)                        | NM_01636<br>4    | 190.8 | 210.7  | 0.0466 | 0.73 |
| HSD11B<br>2  | hydroxysteroid 11-<br>beta<br>dehydrogenase<br>2(HSD11B2)            | NM_00019<br>6    | 458.6 | 245.1  | 0.0466 | 0.51 |
| TRABD        | TraB domain<br>containing(TRAB<br>D)                                 | NM_02520<br>4    | 624   | 944    | 0.0467 | 1.38 |
| WDR33        | WD repeat<br>domain<br>33(WDR33)                                     | NM_00100<br>6623 | 110.6 | 135.3  | 0.0467 | 1.08 |
| WDR33        | WD repeat<br>domain<br>33(WDR33)                                     | NM_00100<br>6623 | 131.2 | 163.2  | 0.0467 | 1.08 |
| ABCD3        | ATP binding<br>cassette subfamily<br>D member<br>3(ABCD3)            | NM_00285<br>8    | 148.9 | 126.4  | 0.047  | 0.77 |
| SLC6A1<br>0P | solute carrier<br>family 6 member<br>10,<br>pseudogene(SLC<br>6A10P) | NR_00308<br>3    | 192.7 | 160    | 0.047  | 0.76 |
|              |                                                                      | XM_94119<br>5    | 1831  | 2947.7 | 0.047  | 1.42 |

|         |                                                       |           |       |       |        |      |
|---------|-------------------------------------------------------|-----------|-------|-------|--------|------|
| FAM210A | family with sequence similarity 210 member A(FAM210A) | NM_152352 | 189.1 | 155.6 | 0.0471 | 0.77 |
| KIF13B  | kinesin family member 13B(KIF13B)                     | NM_015254 | 794.4 | 649.9 | 0.0472 | 0.75 |
| MIR1253 | microRNA 1253(MIR1253)                                | NR_031654 | 143.3 | 191.4 | 0.0472 | 1.17 |
| STXBP5  | syntaxin binding protein 5(STXBP5)                    | NM_139244 | 152.3 | 211.1 | 0.0473 | 1.23 |
| KLHDC3  | kelch domain containing 3(KLHDC3)                     | NM_057161 | 957.9 | 896.4 | 0.0474 | 0.87 |
| TTR     | transthyretin(TTR)                                    | NM_000371 | 205.9 | 141   | 0.0474 | 0.59 |
|         |                                                       | XR_017747 | 109.6 | 110.3 | 0.0474 | 0.92 |
|         |                                                       | XR_017747 | 122.2 | 127.7 | 0.0474 | 0.92 |
|         |                                                       | XR_037812 | 171.6 | 232.6 | 0.0474 | 1.2  |
|         |                                                       | XR_038429 | 99.6  | 124.8 | 0.0474 | 1.13 |
| CLDN3   | claudin 3(CLDN3)                                      | NM_001306 | 214.1 | 151.1 | 0.0476 | 0.67 |

|           |                                                                |              |        |        |        |      |
|-----------|----------------------------------------------------------------|--------------|--------|--------|--------|------|
| OR2T12    | olfactory receptor family 2 subfamily T member 12(OR2T12)      | NM_001004692 | 167.6  | 232    | 0.0476 | 1.2  |
| IFITM4P   | interferon induced transmembrane protein 4 pseudogene(IFITM4P) | NR_001590    | 128.1  | 167.1  | 0.0477 | 1.13 |
| GPD1L     | glycerol-3-phosphate dehydrogenase 1-like(GPD1L)               | NM_015141    | 758.3  | 659.4  | 0.0479 | 0.79 |
|           |                                                                | XR_037672    | 131.4  | 130.6  | 0.0479 | 0.9  |
| GGT6      | gamma-glutamyltransferase 6(GGT6)                              | NM_153338    | 146.5  | 125.8  | 0.048  | 0.77 |
| LINC01420 | long intergenic non-protein coding RNA 1420(LINC01420)         | NR_015367    | 1185.8 | 1017.2 | 0.048  | 0.8  |
|           |                                                                | XR_037282    | 174.7  | 263.9  | 0.048  | 1.34 |
| RIPK4     | receptor interacting serine/threonine kinase 4(RIPK4)          | NM_020639    | 129.6  | 128.8  | 0.0481 | 0.89 |

|        |                                            |           |        |        |        |      |
|--------|--------------------------------------------|-----------|--------|--------|--------|------|
| RPS3A  | ribosomal protein S3A(RPS3A)               | NM_001006 | 5938.6 | 8852.1 | 0.0482 | 1.18 |
| RPS3A  | ribosomal protein S3A(RPS3A)               | NM_001006 | 6427   | 9708   | 0.0482 | 1.18 |
| RPS3A  | ribosomal protein S3A(RPS3A)               | NM_001006 | 6930.3 | 9567.1 | 0.0482 | 1.18 |
| MDM2   | MDM2 proto-oncogene(MDM2)                  | NM_002392 | 146.5  | 194.2  | 0.0483 | 1.14 |
| HSBP1  | heat shock factor binding protein 1(HSBP1) | NM_001537 | 182.4  | 411.4  | 0.0485 | 1.9  |
|        |                                            | XM_930111 | 407.7  | 571.9  | 0.0485 | 1.31 |
|        |                                            | XM_940214 | 409    | 599.6  | 0.0485 | 1.37 |
| AKT3   | AKT serine/threonine kinase 3(AKT3)        | NM_181690 | 117    | 155.4  | 0.0488 | 1.15 |
| RPS21  | ribosomal protein S21(RPS21)               | NM_001024 | 129.8  | 165.5  | 0.0488 | 1.11 |
|        |                                            | XR_041286 | 1127.7 | 1954   | 0.0488 | 1.51 |
|        |                                            | XR_041286 | 3769.8 | 5828   | 0.0488 | 1.51 |
| SMIM13 | small integral membrane protein 13(SMIM13) | AJ420516  | 123    | 114.8  | 0.0489 | 0.86 |

|             |                                                                 |                  |       |       |        |      |
|-------------|-----------------------------------------------------------------|------------------|-------|-------|--------|------|
| ECEL1       | endothelin<br>converting<br>enzyme like<br>1(ECEL1)             | NM_00482<br>6    | 117.2 | 149.2 | 0.0491 | 1.12 |
|             |                                                                 | XM_00112<br>5941 | 270.5 | 659.8 | 0.0491 | 2.22 |
|             |                                                                 | XM_00112<br>5941 | 414.5 | 851   | 0.0491 | 2.22 |
|             |                                                                 | XM_92960<br>8    | 103.9 | 100   | 0.0491 | 0.88 |
| FAM13B      | family with<br>sequence<br>similarity 13<br>member<br>B(FAM13B) | NM_01660<br>3    | 98.9  | 123.7 | 0.0492 | 1.13 |
| HMBS        | hydroxymethylbila<br>ne<br>synthase(HMBS)                       | NM_00019<br>0    | 99.5  | 110.7 | 0.0492 | 0.81 |
| HMBS        | hydroxymethylbila<br>ne<br>synthase(HMBS)                       | NM_00019<br>0    | 149.5 | 135.3 | 0.0492 | 0.81 |
|             |                                                                 | BQ007862         | 105.5 | 129.8 | 0.0492 | 1.09 |
| CECR5       | cat eye syndrome<br>chromosome<br>region, candidate<br>5(CECR5) | NM_01782<br>9    | 137.7 | 135.1 | 0.0494 | 0.88 |
| LYPLAL<br>1 | lysophospholipas<br>e like 1(LYPLAL1)                           | NM_13879<br>4    | 125.1 | 132.7 | 0.0494 | 0.72 |

|         |                                                          |           |        |       |        |      |
|---------|----------------------------------------------------------|-----------|--------|-------|--------|------|
| LYPLAL1 | lysophospholipase like 1(LYPLAL1)                        | NM_138794 | 401.4  | 315   | 0.0494 | 0.72 |
|         |                                                          | XM_932583 | 105.1  | 134.6 | 0.0494 | 1.14 |
| EML1    | echinoderm microtubule associated protein like 1(EML1)   | NM_004434 | 145.4  | 142.5 | 0.0495 | 0.79 |
| EML1    | echinoderm microtubule associated protein like 1(EML1)   | NM_004434 | 210.2  | 187   | 0.0495 | 0.79 |
| ENTPD4  | ectonucleoside triphosphate diphosphohydrolase 4(ENTPD4) | NM_004901 | 150.7  | 196.6 | 0.0495 | 1.13 |
| GADD45A | growth arrest and DNA damage inducible alpha(GADD45A)    | NM_001924 | 1030.8 | 588.5 | 0.0495 | 0.51 |
| GADD45A | growth arrest and DNA damage inducible alpha(GADD45A)    | NM_001924 | 1193   | 939.9 | 0.0495 | 0.51 |
| ALB     | albumin(ALB)                                             | NM_000477 | 1072.9 | 368.6 | 0.0497 | 0.31 |
| ALB     | albumin(ALB)                                             | NM_000477 | 1474.5 | 558.4 | 0.0497 | 0.31 |

|                    |                                                                               |                      |                        |                         |                               |                                |                  |                             |                                    |
|--------------------|-------------------------------------------------------------------------------|----------------------|------------------------|-------------------------|-------------------------------|--------------------------------|------------------|-----------------------------|------------------------------------|
| ATP5D              | ATP synthase, H+ transporting, mitochondrial F1 complex, delta subunit(ATP5D) | NM_001687            | 244.3                  | 225.6                   | 0.0497                        | 0.76                           |                  |                             |                                    |
| ATP5D              | ATP synthase, H+ transporting, mitochondrial F1 complex, delta subunit(ATP5D) | NM_001687            | 910.5                  | 742.3                   | 0.0497                        | 0.76                           | NM_031012        | 19.39                       | 0.85                               |
| MIR1185-1          | microRNA 1185-1(MIR1185-1)                                                    | NR_031575            | 138.9                  | 141.9                   | 0.0497                        | 0.91                           |                  |                             |                                    |
| FGA                | fibrinogen alpha chain(FGA)                                                   | NM_021871            | 187.3                  | 127.9                   | 0.0498                        | 0.6                            |                  |                             |                                    |
| ZC3H3              | zinc finger CCCH-type containing 3(ZC3H3)                                     | NM_015117            | 184.4                  | 242.7                   | 0.0499                        | 1.18                           | NM_012904        | 10.16                       | 55.22                              |
| PHF1               | PHD finger protein 1(PHF1)                                                    | NM_024165            | 110.7                  | 129.5                   | 0.05                          | 1.13                           |                  |                             |                                    |
| PHF1               | PHD finger protein 1(PHF1)                                                    | NM_024165            | 308.9                  | 381.8                   | 0.05                          | 1.13                           |                  |                             |                                    |
| <b>Gene Symbol</b> | <b>Gene Name</b>                                                              | <b>Accession No.</b> | <b>CON Chow M Mean</b> | <b>IUGR Chow M Mean</b> | <b>pval IUGR v CON M Chow</b> | <b>Ratio IUGR v CON M Chow</b> | <b>REFSEQ ID</b> | <b>NEPHRO N (MEAN RPKM)</b> | <b>COLLECTING DUCT (MEAN RPKM)</b> |
| GTPBP6             | GTP binding protein 6 (putative)(GTPBP6)                                      | NM_012227            | 159.9                  | 197                     | 0.0000                        | 1.41                           |                  |                             |                                    |



|        |                                                                 |           |       |       |        |      |           |        |      |
|--------|-----------------------------------------------------------------|-----------|-------|-------|--------|------|-----------|--------|------|
| PDGFA  | platelet derived growth factor subunit A(PDGFA)                 | NM_033023 | 123.1 | 163.8 | 0.0000 | 1.55 |           |        |      |
|        |                                                                 | AW780096  | 106.2 | 112.4 | 0.0000 | 1.16 |           |        |      |
|        |                                                                 | XM_927511 | 115.2 | 92.1  | 0.0000 | 0.85 |           |        |      |
| KDF1   | keratinocyte differentiation factor 1(KDF1)                     | NM_152365 | 139   | 102.2 | 0.0000 | 0.8  |           |        |      |
| csnk1e | casein kinase 1 epsilon(CSNK1E)                                 | NM_152221 | 127.6 | 189.3 | 0.0000 | 1.68 |           |        |      |
| csnk1e | casein kinase 1 epsilon(CSNK1E)                                 | NM_152221 | 142.1 | 149.5 | 0.0000 | 1.68 | NM_017193 | 356.13 | 8.18 |
| RNA5S9 | RNA, 5S ribosomal 9(RNA5S9)                                     | NR_023371 | 156.7 | 218.1 | 0.0000 | 1.57 | NM_017193 | 356.13 | 8.18 |
|        |                                                                 | XR_039453 | 110.5 | 109.9 | 0.0000 | 1.19 | NM_017193 | 356.13 | 8.18 |
|        |                                                                 | XR_039453 | 196.8 | 203.3 | 0.0000 | 1.19 |           |        |      |
|        |                                                                 | XM_931775 | 134.4 | 100.5 | 0.0000 | 0.81 |           |        |      |
| UPF3A  | UPF3 regulator of nonsense transcripts homolog A (yeast)(UPF3A) | NM_023011 | 231   | 347.5 | 0.0000 | 1.68 |           |        |      |

|         |                                                                           |              |       |       |        |      |
|---------|---------------------------------------------------------------------------|--------------|-------|-------|--------|------|
| MTHFD2L | methylenetetrahydrofolate dehydrogenase (NADP+ dependent) 2-like(MTHFD2L) | NM_001004346 | 95.7  | 108   | 0.0000 | 1.23 |
| ZNF33B  | zinc finger protein 33B(ZNF33B)                                           | NM_006955    | 127.8 | 148.8 | 0.0000 | 1.35 |
|         |                                                                           | XM_942469    | 114.8 | 150.9 | 0.0000 | 1.5  |
|         |                                                                           | XM_942469    | 115.9 | 105   | 0.0000 | 1.5  |
| FAM133B | family with sequence similarity 133 member B(FAM133B)                     | NM_152789    | 273.3 | 368.5 | 0.0000 | 1.5  |
| CAPG    | capping actin protein, gelsolin like(CAPG)                                | NM_001747    | 97.6  | 113.5 | 0.0000 | 1.28 |
| MERTK   | MER proto-oncogene, tyrosine kinase(MERTK)                                | NM_006343    | 113.3 | 127.8 | 0.0000 | 1.25 |
| MERTK   | MER proto-oncogene, tyrosine kinase(MERTK)                                | NM_006343    | 181.3 | 237.3 | 0.0000 | 1.25 |
| TCL1B   | T-cell leukemia/lymphoma 1B(TCL1B)                                        | NM_004918    | 114   | 138.6 | 0.0000 | 1.39 |

|        |                                                           |               |       |       |        |      |
|--------|-----------------------------------------------------------|---------------|-------|-------|--------|------|
| ARID4B | AT-rich interaction domain<br>4B(ARID4B)                  | NM_01637<br>4 | 126.6 | 127.9 | 0.0000 | 2.14 |
| ARID4B | AT-rich interaction domain<br>4B(ARID4B)                  | NM_01637<br>4 | 141.3 | 210.3 | 0.0000 | 2.14 |
| ARID4B | AT-rich interaction domain<br>4B(ARID4B)                  | NM_01637<br>4 | 226.6 | 430.2 | 0.0000 | 2.14 |
| THOC2  | THO complex<br>2(THOC2)                                   | NM_02044<br>9 | 245.8 | 402.9 | 0.0000 | 1.83 |
| TDGP1  | thymine-DNA<br>glycosylase<br>pseudogene<br>1(TDGP1)      | NR_02438<br>2 | 94.7  | 112.1 | 0.0000 | 1.29 |
| ZBTB43 | zinc finger and<br>BTB domain<br>containing<br>43(ZBTB43) | NM_01400<br>7 | 116.3 | 139.1 | 0.0000 | 1.34 |
| cep350 | centrosomal<br>protein<br>350(CEP350)                     | NM_01481<br>0 | 155.4 | 199.8 | 0.0000 | 1.45 |
| KDM5A  | lysine<br>demethylase<br>5A(KDM5A)                        | NM_00505<br>6 | 144.1 | 241   | 0.0000 | 1.89 |

|        |                                             |              |       |       |        |      |
|--------|---------------------------------------------|--------------|-------|-------|--------|------|
| NUFIP2 | NUFIP2, FMR1 interacting protein 2(NUFIP2)  | NM_020772    | 111.9 | 158.4 | 0.0000 | 1.83 |
| NUFIP2 | NUFIP2, FMR1 interacting protein 2(NUFIP2)  | NM_020772    | 211.3 | 341.6 | 0.0000 | 1.83 |
|        |                                             | XM_933083    | 143.5 | 101.3 | 0.0000 | 0.77 |
| EXOC1  | exocyst complex component 1(EXOC1)          | NM_001024924 | 111.3 | 135   | 0.0000 | 1.38 |
| TAOK1  | TAO kinase 1(TAOK1)                         | NM_020791    | 96.6  | 114   | 0.0000 | 1.29 |
| TDG    | thymine DNA glycosylase(TDG)                | NM_003211    | 133   | 190.1 | 0.0000 | 1.6  |
| TDG    | thymine DNA glycosylase(TDG)                | NM_003211    | 280.2 | 326.3 | 0.0000 | 1.6  |
|        |                                             | BF107605     | 111.8 | 119.9 | 0.0000 | 1.21 |
| ATXN3  | ataxin 3(ATXN3)                             | NM_004993    | 105.1 | 116.8 | 0.0000 | 1.24 |
| NUMBL  | NUMB like, endocytic adaptor protein(NUMBL) | NM_004756    | 94.2  | 106   | 0.0000 | 1.24 |
| RAD21  | RAD21 cohesin complex component(RAD21)      | NM_006265    | 294.9 | 498   | 0.0000 | 1.89 |

|         |                                           |              |       |        |        |      |
|---------|-------------------------------------------|--------------|-------|--------|--------|------|
| RAD21   | RAD21 cohesin complex component(RAD21)    | NM_006265    | 311.8 | 296.7  | 0.0000 | 1.89 |
| RRBP1   | ribosome binding protein 1(RRBP1)         | NM_001042576 | 130.7 | 165.2  | 0.0000 | 1.44 |
| RRBP1   | ribosome binding protein 1(RRBP1)         | NM_001042576 | 358.3 | 314.1  | 0.0000 | 1.44 |
| VRK3    | vaccinia related kinase 3(VRK3)           | NM_001025778 | 106.9 | 96.8   | 0.0000 | 1.24 |
| VRK3    | vaccinia related kinase 3(VRK3)           | NM_001025778 | 167.3 | 180.3  | 0.0000 | 1.24 |
| WVOX    | WW domain containing oxidoreductase(WVOX) | NM_130844    | 115.6 | 157.5  | 0.0000 | 1.53 |
| PCBP2   | poly(rC) binding protein 2(PCBP2)         | NM_001098620 | 692.1 | 1075.5 | 0.0000 | 1.75 |
|         |                                           | NM_033531    | 98.3  | 152    | 0.0000 | 1.72 |
| ANKRD17 | ankyrin repeat domain 17(ANKRD17)         | NM_032217    | 98.6  | 126    | 0.0000 | 1.43 |
| RRAGB   | Ras related GTP binding B(RRAGB)          | NM_006064    | 124.9 | 110.8  | 0.0010 | 0.66 |
| RRAGB   | Ras related GTP binding B(RRAGB)          | NM_006064    | 146.7 | 91.4   | 0.0010 | 0.66 |

|             |                                                           |                  |       |       |        |      |
|-------------|-----------------------------------------------------------|------------------|-------|-------|--------|------|
| ADAT1       | adenosine<br>deaminase, tRNA<br>specific 1(ADAT1)         | NM_01209<br>1    | 107.3 | 112.3 | 0.0010 | 1.15 |
| TUBA3F<br>P | tubulin alpha 3f<br>pseudogene(TUB<br>A3FP)               | NR_00360<br>8    | 118.3 | 95.8  | 0.0010 | 0.86 |
| ASAH1       | N-<br>acylsphingosine<br>amidohydrolase<br>1(ASAH1)       | NM_17792<br>4    | 120.5 | 96.2  | 0.0010 | 0.86 |
| FRYL        | FRY like<br>transcription<br>coactivator(FRYL)            | NM_01503<br>0    | 101.3 | 99    | 0.0010 | 1.41 |
| FRYL        | FRY like<br>transcription<br>coactivator(FRYL)            | NM_01503<br>0    | 115.5 | 105.1 | 0.0010 | 1.41 |
| FRYL        | FRY like<br>transcription<br>coactivator(FRYL)            | NM_01503<br>0    | 187.9 | 237.9 | 0.0010 | 1.41 |
|             |                                                           | XM_00113<br>1286 | 127.8 | 99.7  | 0.0010 | 0.83 |
| RSPRY<br>1  | ring finger and<br>SPRY domain<br>containing<br>1(RSPRY1) | NM_13336<br>8    | 218.9 | 294.2 | 0.0010 | 1.5  |
|             |                                                           | AW274669         | 124.3 | 94.1  | 0.0010 | 0.82 |

|         |                                                             |              |       |       |        |      |           |      |       |
|---------|-------------------------------------------------------------|--------------|-------|-------|--------|------|-----------|------|-------|
| SUZ12   | SUZ12 polycomb repressive complex 2 subunit(SUZ12)          | NM_015355    | 297.5 | 493.9 | 0.0010 | 1.88 |           |      |       |
|         |                                                             | XR_039881    | 94.7  | 115.4 | 0.0010 | 1.33 |           |      |       |
| PHF7    | PHD finger protein 7(PHF7)                                  | NM_016483    | 116.6 | 96.1  | 0.0010 | 0.88 | NM_053502 | 4.02 | 18.01 |
|         | nuclear protein, coactivator of histone transcription(NPAT) |              |       |       |        |      |           |      |       |
| NPAT    |                                                             | NM_002519    | 92.4  | 103   | 0.0010 | 1.21 | NM_053502 | 4.02 | 18.01 |
|         |                                                             |              |       |       |        |      |           |      |       |
| C1orf64 | chromosome 1 open reading frame 64(C1orf64)                 | NM_178840    | 117.9 | 89.7  | 0.0010 | 0.81 | NM_053502 | 4.02 | 18.01 |
|         |                                                             |              |       |       |        |      |           |      |       |
| FCGR1B  | Fc fragment of IgG receptor 1b(FCGR1B)                      | NM_001017986 | 93.1  | 105.4 | 0.0010 | 1.23 |           |      |       |
|         | abhydrolase domain containing 2(ABHD2)                      |              |       |       |        |      |           |      |       |
| ABHD2   |                                                             | NM_152924    | 116.5 | 120.2 | 0.0010 | 1.23 |           |      |       |
|         | abhydrolase domain containing 2(ABHD2)                      |              |       |       |        |      |           |      |       |
| ABHD2   |                                                             | NM_152924    | 116.9 | 126.8 | 0.0010 | 1.23 |           |      |       |

|         |                                                              |              |        |       |        |      |              |            |
|---------|--------------------------------------------------------------|--------------|--------|-------|--------|------|--------------|------------|
| whsc111 | Wolf-Hirschhorn syndrome candidate 1-like 1(WHSC1L1)         | NM_023034    | 96.6   | 112.4 | 0.0010 | 1.27 |              |            |
| SLC38A3 | solute carrier family 38 member 3(SLC38A3)                   | NM_006841    | 210.4  | 114.2 | 0.0010 | 0.59 |              |            |
| CREB1   | cAMP responsive element binding protein 1(CREB1)             | AK126342     | 178    | 297.7 | 0.0010 | 1.89 | NM_001009670 | 33.30 2.04 |
|         |                                                              | NM_001001977 | 1360.1 | 813.4 | 0.0010 | 0.69 |              |            |
| RPRD2   | regulation of nuclear pre-mRNA domain containing 2(RPRD2)    | NM_015203    | 103.1  | 111.3 | 0.0010 | 1.18 |              |            |
| RPRD2   | regulation of nuclear pre-mRNA domain containing 2(RPRD2)    | NM_015203    | 194.2  | 177.9 | 0.0010 | 1.18 |              |            |
|         |                                                              | XR_040782    | 111.2  | 92.2  | 0.0010 | 0.89 |              |            |
| UPF2    | UPF2 regulator of nonsense transcripts homolog (yeast)(UPF2) | NM_015542    | 267.8  | 500.7 | 0.0010 | 2.13 |              |            |
| ZNF451  | zinc finger protein 451(ZNF451)                              | NM_001031623 | 101.2  | 104.1 | 0.0010 | 1.37 |              |            |



|          |                                                     |              |        |        |        |      |
|----------|-----------------------------------------------------|--------------|--------|--------|--------|------|
| ZNF451   | zinc finger protein 451(ZNF451)                     | NM_001031623 | 105.3  | 127.4  | 0.0010 | 1.37 |
| CWC22    | CWC22 spliceosome associated protein homolog(CWC22) | NM_020943    | 94.6   | 108.8  | 0.0010 | 1.26 |
| PCBP2    | poly(rC) binding protein 2(PCBP2)                   | NM_005016    | 1645.9 | 2165.2 | 0.0010 | 1.4  |
| UBE2D2   | ubiquitin conjugating enzyme E2 D2(UBE2D2)          | NM_181838    | 93.5   | 103.9  | 0.0010 | 1.21 |
| PSMD9    | proteasome 26S subunit, non-ATPase 9(PSMD9)         | NM_002813    | 141.1  | 103.9  | 0.0010 | 0.79 |
| C21orf58 | chromosome 21 open reading frame 58(C21orf58)       | NM_058180    | 1075.2 | 1541.9 | 0.0010 | 1.64 |
| HOOK3    | hook microtubule tethering protein 3(HOOK3)         | NM_032410    | 96.2   | 111.3  | 0.0010 | 1.26 |
| POGZ     | pogo transposable element with ZNF domain(POGZ)     | NM_015110    | 112.2  | 139.6  | 0.0010 | 1.4  |

|               |                                                                     |                  |       |       |        |      |
|---------------|---------------------------------------------------------------------|------------------|-------|-------|--------|------|
| LSM8          | LSM8 homolog,<br>U6 small nuclear<br>RNA<br>associated(LSM8)        | NM_01620<br>0    | 98.6  | 124.7 | 0.0010 | 1.4  |
| C1orf11<br>5  | chromosome 1<br>open reading<br>frame<br>115(C1orf115)              | NM_02470<br>9    | 249.6 | 110.1 | 0.0010 | 0.47 |
| RBCK1         | RANBP2-type and<br>C3HC4-type zinc<br>finger containing<br>1(RBCK1) | NM_00646<br>2    | 153   | 152.4 | 0.0010 | 1.13 |
| MPHOS<br>PH10 | M-phase<br>phosphoprotein<br>10(MPHOSPH10)                          | NM_00579<br>1    | 364.7 | 409.1 | 0.0010 | 1.27 |
| ZNF689        | zinc finger protein<br>689(ZNF689)                                  | NM_13844<br>7    | 146.5 | 170.6 | 0.0010 | 1.34 |
| CARS          | cysteinyl-tRNA<br>synthetase(CARS<br>)                              | NM_00101<br>4438 | 146.1 | 224.4 | 0.0010 | 1.75 |
| ATXN3         | ataxin 3(ATXN3)                                                     | NM_03066<br>0    | 126.2 | 167.2 | 0.0010 | 1.49 |
| GMCL1         | germ cell-less,<br>spermatogenesis<br>associated<br>1(GMCL1)        | NM_17843<br>9    | 99    | 95.1  | 0.0010 | 1.44 |

|        |                                                              |                  |       |       |        |      |
|--------|--------------------------------------------------------------|------------------|-------|-------|--------|------|
| GMCL1  | germ cell-less,<br>spermatogenesis<br>associated<br>1(GMCL1) | NM_17843<br>9    | 123   | 160.1 | 0.0010 | 1.44 |
| VPS13C | vacuolar protein<br>sorting 13<br>homolog<br>C(VPS13C)       | NM_01808<br>0    | 125   | 149.5 | 0.0010 | 1.36 |
| RBBP6  | RB binding<br>protein 6,<br>ubiquitin<br>ligase(RBBP6)       | NM_03262<br>6    | 144.7 | 204.2 | 0.0010 | 1.59 |
|        |                                                              | XM_29420<br>9    | 92.7  | 103   | 0.0010 | 1.19 |
| VCP    | valosin containing<br>protein(VCP)                           | NM_00712<br>6    | 504.6 | 324.9 | 0.0010 | 0.73 |
|        |                                                              | XM_00172<br>5606 | 104.8 | 113.7 | 0.0010 | 1.2  |
| RGPD5  | RANBP2-like and<br>GRIP domain<br>containing<br>5(RGPD5)     | NM_00505<br>4    | 85.4  | 101.5 | 0.0010 | 1.28 |
| ELF2   | E74 like ETS<br>transcription factor<br>2(ELF2)              | NM_00687<br>4    | 94.4  | 122.1 | 0.0010 | 1.45 |
| ELF2   | E74 like ETS<br>transcription factor<br>2(ELF2)              | NM_00687<br>4    | 146   | 149.3 | 0.0010 | 1.45 |
| bbx    | BBX, HMG-box<br>containing(BBX)                              | NM_02023<br>5    | 236.9 | 373.6 | 0.0010 | 1.74 |

|        |                                                             |              |        |        |        |      |
|--------|-------------------------------------------------------------|--------------|--------|--------|--------|------|
| RUFY3  | RUN and FYVE domain containing 3(RUFY3)                     | NM_014961    | 118.1  | 152.9  | 0.0010 | 1.43 |
|        |                                                             | XM_001714086 | 94.7   | 117.5  | 0.0010 | 1.37 |
|        |                                                             | XR_019071    | 332.4  | 502.8  | 0.0010 | 1.72 |
| FOXO3  | forkhead box O3(FOXO3)                                      | NM_201559    | 197.9  | 362.9  | 0.0010 | 2.01 |
| FOXO3  | forkhead box O3(FOXO3)                                      | NM_201559    | 273    | 307.7  | 0.0010 | 2.01 |
| TIA1   | TIA1 cytotoxic granule associated RNA binding protein(TIA1) | NM_022037    | 165.9  | 239    | 0.0010 | 1.6  |
| UBC    | ubiquitin C(UBC)                                            | NM_021009    | 7920.3 | 5031   | 0.0020 | 0.66 |
| UBC    | ubiquitin C(UBC)                                            | NM_021009    | 9534   | 7321.4 | 0.0020 | 0.66 |
| XRCC5  | X-ray repair cross complementing 5(XRCC5)                   | NM_021141    | 116.8  | 129.5  | 0.0020 | 1.27 |
|        |                                                             | CD520639     | 103.8  | 109.2  | 0.0020 | 1.15 |
|        |                                                             | DA877611     | 109.7  | 89.1   | 0.0020 | 0.86 |
| CREBRF | CREB3 regulatory factor(CREBRF)                             | NM_153607    | 195.6  | 260.6  | 0.0020 | 1.45 |

|        |                                                           |              |       |       |        |      |
|--------|-----------------------------------------------------------|--------------|-------|-------|--------|------|
| CREBRF | CREB3 regulatory factor(CREBRF)                           | NM_153607    | 206.9 | 332   | 0.0020 | 1.45 |
| BICD2  | BICD cargo adaptor 2(BICD2)                               | NM_001003800 | 159.2 | 209.9 | 0.0020 | 1.5  |
| MAD1L1 | MAD1 mitotic arrest deficient like 1(MAD1L1)              | NM_001013836 | 98.6  | 109   | 0.0020 | 1.2  |
| MAD1L1 | MAD1 mitotic arrest deficient like 1(MAD1L1)              | NM_001013836 | 109.5 | 97.4  | 0.0020 | 1.2  |
| OR6C74 | olfactory receptor family 6 subfamily C member 74(OR6C74) | NM_001005490 | 117.6 | 92.6  | 0.0020 | 0.83 |
| ZNF669 | zinc finger protein 669(ZNF669)                           | NM_024804    | 229.4 | 271.1 | 0.0020 | 1.3  |
| ZNF669 | zinc finger protein 669(ZNF669)                           | NM_024804    | 490.1 | 450   | 0.0020 | 1.3  |
| LRRC29 | leucine rich repeat containing 29(LRRC29)                 | NM_001004055 | 215.6 | 135.7 | 0.0020 | 0.71 |
| CDHR2  | cadherin related family member 2(CDHR2)                   | NM_017675    | 140.3 | 106.7 | 0.0020 | 0.83 |
|        |                                                           | XM_926303    | 117.5 | 95    | 0.0020 | 0.88 |

|          |                                                           |              |       |       |        |      |
|----------|-----------------------------------------------------------|--------------|-------|-------|--------|------|
| PCYT2    | phosphate<br>cytidyltransferase 2,<br>ethanolamine(PCYT2) | NM_002861    | 161.6 | 104.6 | 0.0020 | 0.71 |
|          |                                                           | XM_942896    | 174.8 | 122.8 | 0.0020 | 0.79 |
| CLK2P1   | CDC like kinase 2, pseudogene 1(CLK2P1)                   | NR_002711    | 117.3 | 141.4 | 0.0020 | 1.35 |
| C2orf78  | chromosome 2 open reading frame 78(C2orf78)               | NM_001080474 | 116.5 | 93.7  | 0.0020 | 0.84 |
| PNLDC1   | PARN like, ribonuclease domain containing 1(PNLDC1)       | NM_173516    | 97.6  | 105.4 | 0.0020 | 1.19 |
| AMMECR1L | AMMECR1 like(AMMECR1L)                                    | NM_031445    | 134.5 | 164.7 | 0.0020 | 1.38 |
| AGO2     | argonaute 2, RISC catalytic component(AGO2)               | NM_012154    | 221.4 | 378.9 | 0.0020 | 1.91 |
| MYLK     | myosin light chain kinase(MYLK)                           | NM_053026    | 142.6 | 161.7 | 0.0020 | 1.29 |
|          |                                                           | XM_001726093 | 161.4 | 114.8 | 0.0020 | 0.79 |

|         |                                                                                                               |           |       |       |        |      |              |      |        |
|---------|---------------------------------------------------------------------------------------------------------------|-----------|-------|-------|--------|------|--------------|------|--------|
| SMG1P2  | SMG1P2,<br>nonsense<br>mediated mRNA<br>decay associated<br>PI3K related<br>kinase<br>pseudogene<br>2(SMG1P2) | NR_002473 | 118.5 | 129.8 | 0.0020 | 1.22 |              |      |        |
| DENND1B | DENN domain<br>containing<br>1B(DENND1B)                                                                      | NM_019049 | 175.9 | 218.2 | 0.0020 | 1.46 |              |      |        |
| MSL3    | male-specific<br>lethal 3 homolog<br>(Drosophila)(MSL3)                                                       | NM_078629 | 177.7 | 374.5 | 0.0020 | 2.39 | NM_001107943 | 0.63 | 112.77 |
| MSL3    | male-specific<br>lethal 3 homolog<br>(Drosophila)(MSL3)                                                       | NM_078629 | 179.7 | 311   | 0.0020 | 2.39 |              |      |        |
|         |                                                                                                               | XM_933942 | 144.2 | 111.9 | 0.0020 | 0.85 |              |      |        |
| CCNDBP1 | cyclin D1 binding<br>protein<br>1(CCNDBP1)                                                                    | NM_037370 | 391.9 | 472.1 | 0.0020 | 1.39 |              |      |        |
| Snora2b | small nucleolar<br>RNA, H/ACA box<br>2B(SNORA2B)                                                              | NR_002951 | 114.4 | 136   | 0.0020 | 1.36 |              |      |        |
| GSR     | glutathione-<br>disulfide<br>reductase(GSR)                                                                   | NM_000637 | 93.1  | 104.7 | 0.0020 | 1.22 |              |      |        |

|             |                                                                          |                  |       |       |        |      |               |       |      |
|-------------|--------------------------------------------------------------------------|------------------|-------|-------|--------|------|---------------|-------|------|
| GSR         | glutathione-<br>disulfide<br>reductase(GSR)                              | NM_00063<br>7    | 127.3 | 104.6 | 0.0020 | 1.22 |               |       |      |
| PLEKH<br>G7 | pleckstrin<br>homology and<br>RhoGEF domain<br>containing<br>G7(PLEKHG7) | NM_00100<br>4330 | 98.6  | 108.1 | 0.0020 | 1.2  |               |       |      |
| LYPD4       | LY6/PLAUR<br>domain<br>containing<br>4(LYPD4)                            | NM_17350<br>6    | 135.8 | 106.4 | 0.0020 | 0.86 |               |       |      |
| VSIG8       | V-set and<br>immunoglobulin<br>domain<br>containing<br>8(VSIG8)          | NM_00101<br>3661 | 86    | 100.1 | 0.0020 | 1.26 |               |       |      |
| KIF5A       | kinesin family<br>member<br>5A(KIF5A)                                    | NM_00498<br>4    | 146.4 | 111.7 | 0.0020 | 0.84 |               |       |      |
| RABGA<br>P1 | RAB GTPase<br>activating protein<br>1(RABGAP1)                           | NM_01219<br>7    | 309   | 385.1 | 0.0020 | 1.38 |               |       |      |
| PMS1        | PMS1 homolog 1,<br>mismatch repair<br>system<br>component(PMS1<br>)      | NM_00053<br>4    | 98.7  | 107   | 0.0020 | 1.18 | NM_1343<br>72 | 22.51 | 0.03 |
|             |                                                                          | CD242195         | 119.9 | 94.6  | 0.0020 | 0.84 |               |       |      |



|        |                                                                        |                  |       |       |        |      |
|--------|------------------------------------------------------------------------|------------------|-------|-------|--------|------|
| ZRANB2 | zinc finger<br>RANBP2-type<br>containing<br>2(ZRANB2)                  | NM_005445<br>5   | 117.1 | 118.4 | 0.0020 | 1.37 |
| ZRANB2 | zinc finger<br>RANBP2-type<br>containing<br>2(ZRANB2)                  | NM_005445<br>5   | 155.9 | 186.5 | 0.0020 | 1.37 |
|        |                                                                        | XR_03802<br>7    | 89.7  | 98.5  | 0.0020 | 1.19 |
|        |                                                                        | XR_03802<br>7    | 113.2 | 100.4 | 0.0020 | 1.19 |
| ASXL2  | additional sex<br>combs like 2,<br>transcriptional<br>regulator(ASXL2) | NM_01826<br>3    | 130.2 | 206.1 | 0.0020 | 1.82 |
| TTC14  | tetratricopeptide<br>repeat domain<br>14(TTC14)                        | NM_00104<br>2601 | 252.9 | 364.7 | 0.0020 | 1.62 |
| STAU1  | staufen double-<br>stranded RNA<br>binding protein<br>1(STAU1)         | NM_01745<br>3    | 95.8  | 112.9 | 0.0020 | 1.31 |
|        |                                                                        | BM715751         | 123.2 | 96.7  | 0.0030 | 0.86 |
| CCDC9  | coiled-coil domain<br>containing<br>9(CCDC9)                           | NM_01560<br>3    | 106.3 | 111.7 | 0.0030 | 1.16 |

|            |                                                                       |                  |       |       |        |      |
|------------|-----------------------------------------------------------------------|------------------|-------|-------|--------|------|
| RMND5<br>B | required for<br>meiotic nuclear<br>division 5<br>homolog<br>B(RMND5B) | NM_02276<br>2    | 120.5 | 133   | 0.0030 | 1.27 |
| RRS1       | ribosome<br>biogenesis<br>regulator<br>homolog(RRS1)                  | NM_01516<br>9    | 119.4 | 131.8 | 0.0030 | 1.23 |
|            |                                                                       | XM_00112<br>6824 | 150.6 | 111.8 | 0.0030 | 0.82 |
| MTERF1     | mitochondrial<br>transcription<br>termination factor<br>1(MTERF1)     | NM_00698<br>0    | 156.3 | 192.2 | 0.0030 | 1.41 |
| TOX2       | TOX high mobility<br>group box family<br>member 2(TOX2)               | NM_00109<br>8796 | 95.6  | 102.3 | 0.0030 | 1.17 |
| WRN        | Werner syndrome<br>RecQ like<br>helicase(WRN)                         | NM_00055<br>3    | 119.9 | 136.4 | 0.0030 | 1.29 |
| ARMCX<br>6 | armadillo repeat<br>containing, X-<br>linked<br>6(ARMCX6)             | NM_01900<br>7    | 99    | 97.4  | 0.0030 | 1.3  |
| ARMCX<br>6 | armadillo repeat<br>containing, X-<br>linked<br>6(ARMCX6)             | NM_01900<br>7    | 115.1 | 132.9 | 0.0030 | 1.3  |

|        |                                                             |           |        |        |        |      |              |            |
|--------|-------------------------------------------------------------|-----------|--------|--------|--------|------|--------------|------------|
| FAM98C | family with sequence similarity 98 member C(FAM98C)         | NM_174905 | 153.5  | 177    | 0.0030 | 1.32 |              |            |
| ZSCAN9 | zinc finger and SCAN domain containing 9(ZSCAN9)            | NM_006299 | 93.8   | 113.4  | 0.0030 | 1.32 |              |            |
| SIRT5  | sirtuin 5(SIRT5)                                            | NM_031244 | 101.3  | 117.7  | 0.0030 | 1.28 |              |            |
| SIRT5  | sirtuin 5(SIRT5)                                            | NM_031244 | 107.1  | 102.1  | 0.0030 | 1.28 |              |            |
| MTF2   | metal response element binding transcription factor 2(MTF2) | NM_007358 | 177.6  | 318    | 0.0030 | 2.02 | NM_001031645 | 1.93 10.04 |
| aste1  | asteroid homolog 1 (Drosophila)(ASTE1)                      | NM_014065 | 90.3   | 102.8  | 0.0030 | 1.22 |              |            |
| ADGRF5 | adhesion G protein-coupled receptor F5(ADGRF5)              | NM_015234 | 1392.1 | 1820.8 | 0.0030 | 1.45 |              |            |
|        |                                                             | AK095804  | 139.3  | 101.1  | 0.0030 | 0.78 |              |            |
| TADA2A | transcriptional adaptor 2A(TADA2A)                          | NM_001488 | 101.5  | 107.8  | 0.0030 | 1.17 |              |            |
|        |                                                             | XM_930777 | 109.7  | 126.2  | 0.0030 | 1.29 |              |            |

|              |                                                                              |                  |       |       |        |      |               |               |
|--------------|------------------------------------------------------------------------------|------------------|-------|-------|--------|------|---------------|---------------|
| UGCG         | UDP-glucose<br>ceramide<br>glucosyltransferase(UGCG)                         | NM_00335<br>8    | 265.4 | 517.2 | 0.0030 | 2.22 |               |               |
| C11orf8<br>4 | chromosome 11<br>open reading<br>frame<br>84(C11orf84)                       | NM_13847<br>1    | 99.7  | 107.1 | 0.0030 | 1.18 |               |               |
|              |                                                                              | AA651832         | 100.5 | 106   | 0.0030 | 1.17 |               |               |
| RIMKLB       | ribosomal<br>modification<br>protein rimK like<br>family member<br>B(RIMKLB) | NM_02073<br>4    | 106.4 | 116.8 | 0.0030 | 1.21 |               |               |
|              |                                                                              | XR_03860<br>7    | 111.1 | 129.7 | 0.0030 | 1.32 |               |               |
| PSRC1        | proline and serine<br>rich coiled-coil<br>1(PSRC1)                           | NM_00103<br>2290 | 137.2 | 107.7 | 0.0030 | 0.86 |               |               |
| LILRA4       | leukocyte<br>immunoglobulin<br>like receptor<br>A4(LILRA4)                   | NM_01227<br>6    | 93.9  | 107   | 0.0030 | 1.24 |               |               |
|              |                                                                              | XM_93035<br>0    | 108.5 | 121.4 | 0.0030 | 1.27 |               |               |
|              |                                                                              | XM_92828<br>1    | 108.4 | 118.5 | 0.0030 | 1.2  |               |               |
|              |                                                                              | XM_92861<br>9    | 177.5 | 132.5 | 0.0040 | 0.85 | NM_1447<br>48 | 66.99<br>0.14 |

|              |                                                                |              |       |       |        |      |              |       |      |
|--------------|----------------------------------------------------------------|--------------|-------|-------|--------|------|--------------|-------|------|
| TRIM36       | tripartite motif containing 36(TRIM36)                         | NM_001017397 | 109.7 | 87.1  | 0.0040 | 0.84 |              |       |      |
| IFITM4P      | interferon induced transmembrane protein 4 pseudogene(IFITM4P) | NR_001590    | 143.1 | 107.8 | 0.0040 | 0.82 |              |       |      |
| LOC102724002 | uncharacterized LOC102724002(LOC102724002)                     | AK025166     | 167   | 190.7 | 0.0040 | 1.31 |              |       |      |
| UBE2E3       | ubiquitin conjugating enzyme E2 E3(UBE2E3)                     | NM_006357    | 127.3 | 102.7 | 0.0040 | 0.87 |              |       |      |
| UBE2E3       | ubiquitin conjugating enzyme E2 E3(UBE2E3)                     | NM_006357    | 157.4 | 139.3 | 0.0040 | 0.87 |              |       |      |
| UBE2E3       | ubiquitin conjugating enzyme E2 E3(UBE2E3)                     | NM_006357    | 431   | 339.9 | 0.0040 | 0.87 |              |       |      |
|              |                                                                | XR_015946    | 132.6 | 140.9 | 0.0040 | 1.21 |              |       |      |
|              |                                                                | XR_015946    | 228   | 225.6 | 0.0040 | 1.21 | NM_001107793 | 77.29 | 6.85 |
| LOC643923    | uncharacterized LOC643923(LOC643923)                           | NM_001039772 | 94.1  | 107   | 0.0040 | 1.25 | NM_001107793 | 77.29 | 6.85 |

|        |                                                        |           |       |       |        |      |              |       |      |
|--------|--------------------------------------------------------|-----------|-------|-------|--------|------|--------------|-------|------|
| CHRNA5 | cholinergic receptor nicotinic alpha 5 subunit(CHRNA5) | NM_000745 | 897.2 | 1337  | 0.0040 | 1.64 | NM_001107793 | 77.29 | 6.85 |
| LRRK2  | leucine rich repeat kinase 2(LRRK2)                    | NM_198578 | 99.3  | 104.1 | 0.0040 | 1.14 |              |       |      |
| DCAF16 | DDB1 and CUL4 associated factor 16(DCAF16)             | NM_017741 | 99.8  | 106.4 | 0.0040 | 1.15 |              |       |      |
| ZNF317 | zinc finger protein 317(ZNF317)                        | NM_020933 | 127.1 | 143.5 | 0.0040 | 1.29 |              |       |      |
| DLGAP4 | DLG associated protein 4(DLGAP4)                       | NM_183006 | 117.8 | 96.9  | 0.0040 | 0.89 |              |       |      |
| RPN2   | ribophorin II(RPN2)                                    | NM_002951 | 285.7 | 330.9 | 0.0040 | 1.29 |              |       |      |
|        |                                                        | XR_037397 | 93.1  | 104.6 | 0.0040 | 1.23 |              |       |      |
|        |                                                        | XM_372319 | 144.1 | 108.4 | 0.0040 | 0.82 |              |       |      |
| TTLL3  | tubulin tyrosine ligase like 3(TTLL3)                  | NM_015644 | 126.8 | 102.6 | 0.0040 | 0.87 |              |       |      |
| TTLL3  | tubulin tyrosine ligase like 3(TTLL3)                  | NM_015644 | 160.9 | 152.3 | 0.0040 | 0.87 |              |       |      |
| NEK8   | NIMA related kinase 8(NEK8)                            | NM_178170 | 125.8 | 136.7 | 0.0040 | 1.25 |              |       |      |

|              |                                                                           |                  |       |       |        |      |
|--------------|---------------------------------------------------------------------------|------------------|-------|-------|--------|------|
|              |                                                                           | XM_92795<br>7    | 130.6 | 98.5  | 0.0040 | 0.81 |
| C9orf85      | chromosome 9<br>open reading<br>frame 85(C9orf85)                         | NM_18250<br>5    | 116.8 | 133.4 | 0.0040 | 1.27 |
| TXLNGY       | taxilin gamma<br>pseudogene, Y-<br>linked(TXLNGY)                         | NM_00100<br>5852 | 88.2  | 106.8 | 0.0040 | 1.32 |
| ZNF148       | zinc finger protein<br>148(ZNF148)                                        | NM_02196<br>4    | 585.7 | 881.1 | 0.0040 | 1.69 |
| RASAL2       | RAS protein<br>activator like<br>2(RASAL2)                                | NM_17069<br>2    | 92.3  | 104.5 | 0.0040 | 1.22 |
| M6PR         | mannose-6-<br>phosphate<br>receptor, cation<br>dependent(M6PR<br>)        | NM_00235<br>5    | 675   | 1018  | 0.0040 | 1.64 |
| WDFY3        | WD repeat and<br>FYVE domain<br>containing<br>3(WDFY3)                    | NM_17858<br>3    | 113.6 | 92.1  | 0.0050 | 0.85 |
| SCARN<br>A18 | small Cajal body-<br>specific RNA<br>18(SCARNA18)                         | NR_00313<br>9    | 102.7 | 117.9 | 0.0050 | 1.29 |
| PIP5K1<br>B  | phosphatidylinosit<br>ol-4-phosphate 5-<br>kinase type 1<br>beta(PIP5K1B) | NM_00355<br>8    | 99.6  | 114.7 | 0.0050 | 1.27 |

|        |                                                          |              |       |       |        |      |
|--------|----------------------------------------------------------|--------------|-------|-------|--------|------|
|        |                                                          | XM_001720423 | 149.9 | 108   | 0.0050 | 0.81 |
| SCML1  | sex comb on midleg-like 1 (Drosophila)(SCML1)            | NM_001037540 | 123.8 | 127.6 | 0.0050 | 1.21 |
| SCML1  | sex comb on midleg-like 1 (Drosophila)(SCML1)            | NM_001037540 | 128.5 | 137.4 | 0.0050 | 1.21 |
|        |                                                          | XR_017689    | 128.7 | 105.4 | 0.0050 | 0.89 |
|        |                                                          | XR_038018    | 343.3 | 198.7 | 0.0050 | 0.66 |
| TRIM52 | tripartite motif containing 52(TRIM52)                   | NM_032765    | 109.9 | 143.1 | 0.0050 | 1.46 |
|        |                                                          | XR_015455    | 131.6 | 112.3 | 0.0050 | 1.36 |
|        |                                                          | XR_015455    | 134.9 | 157   | 0.0050 | 1.36 |
| MAP3K7 | mitogen-activated protein kinase kinase kinase 7(MAP3K7) | NM_145331    | 159.4 | 212.6 | 0.0050 | 1.49 |
|        |                                                          | AB074162     | 112.2 | 132.5 | 0.0050 | 1.33 |
| HJURP  | Holliday junction recognition protein(HJURP)             | NM_018410    | 93.4  | 103.8 | 0.0050 | 1.21 |



|               |                                                                                |                  |       |       |        |      |                  |       |      |
|---------------|--------------------------------------------------------------------------------|------------------|-------|-------|--------|------|------------------|-------|------|
| HNRNP<br>A3P1 | heterogeneous<br>nuclear<br>ribonucleoprotein<br>A3 pseudogene<br>1(HNRNPA3P1) | NR_00272<br>6    | 114.9 | 124   | 0.0050 | 1.21 |                  |       |      |
| BAGE5         | B melanoma<br>antigen family<br>member<br>5(BAGE5)                             | NM_18248<br>4    | 110.4 | 112.5 | 0.0050 | 1.13 | NM_0010<br>09603 | 28.32 | 0.90 |
|               |                                                                                | XR_03795<br>6    | 121.3 | 93.8  | 0.0050 | 0.84 |                  |       |      |
| SRP19         | signal recognition<br>particle<br>19(SRP19)                                    | NM_00313<br>5    | 216.5 | 275.1 | 0.0050 | 1.4  |                  |       |      |
| CHD2          | chromodomain<br>helicase DNA<br>binding protein<br>2(CHD2)                     | NM_00104<br>2572 | 88.6  | 103   | 0.0050 | 1.27 |                  |       |      |
|               |                                                                                | AW297854         | 122.1 | 97.9  | 0.0050 | 0.86 |                  |       |      |
| BCLAF1        | BCL2 associated<br>transcription factor<br>1(BCLAF1)                           | NM_00107<br>7440 | 107.8 | 132.4 | 0.0050 | 1.36 |                  |       |      |
| BCLAF1        | BCL2 associated<br>transcription factor<br>1(BCLAF1)                           | NM_00107<br>7440 | 556.2 | 636.2 | 0.0050 | 1.36 |                  |       |      |
| CBLL1         | Cbl proto-<br>oncogene like<br>1(CBLL1)                                        | NM_02481<br>4    | 114   | 91.5  | 0.0050 | 0.86 |                  |       |      |
| CBLL1         | Cbl proto-<br>oncogene like<br>1(CBLL1)                                        | NM_02481<br>4    | 141.2 | 115.2 | 0.0050 | 0.86 |                  |       |      |

|             |                                                        |                  |       |       |        |      |
|-------------|--------------------------------------------------------|------------------|-------|-------|--------|------|
|             |                                                        | XM_92714<br>2    | 102.6 | 112.5 | 0.0050 | 1.2  |
| FBXO11      | F-box protein<br>11(FBXO11)                            | NM_02513<br>3    | 351.7 | 374.5 | 0.0050 | 1.31 |
| FBXO11      | F-box protein<br>11(FBXO11)                            | NM_02513<br>3    | 514.1 | 596.4 | 0.0050 | 1.31 |
| CDK11A      | cyclin dependent<br>kinase<br>11A(CDK11A)              | NM_02401<br>1    | 112.4 | 131.7 | 0.0050 | 1.29 |
| KAZN        | kazrin, periplakin<br>interacting<br>protein(KAZN)     | NM_00101<br>8000 | 128.2 | 152.1 | 0.0050 | 1.37 |
| KAZN        | kazrin, periplakin<br>interacting<br>protein(KAZN)     | NM_00101<br>8000 | 212.7 | 253.4 | 0.0050 | 1.37 |
| SF3B1       | splicing factor 3b<br>subunit 1(SF3B1)                 | NM_01243<br>3    | 114.4 | 148.3 | 0.0050 | 1.43 |
| SF3B1       | splicing factor 3b<br>subunit 1(SF3B1)                 | NM_01243<br>3    | 542.8 | 636.6 | 0.0050 | 1.43 |
| FAM122<br>A | family with<br>sequence<br>similarity<br>122A(FAM122A) | NM_13833<br>3    | 118.4 | 96.9  | 0.0060 | 0.89 |
| CPNE1       | copine 1(CPNE1)                                        | NM_00391<br>5    | 96.3  | 103.7 | 0.0060 | 1.17 |
|             |                                                        | XM_92956<br>5    | 217.9 | 143.8 | 0.0060 | 0.76 |

|         |                                                                               |           |        |        |        |      |
|---------|-------------------------------------------------------------------------------|-----------|--------|--------|--------|------|
| PITPNC1 | phosphatidylinositol transfer protein, cytoplasmic 1(PITPNC1)                 | NM_181671 | 142.3  | 159.1  | 0.0060 | 1.27 |
|         |                                                                               | BQ027703  | 100.5  | 105.4  | 0.0060 | 1.14 |
|         |                                                                               | BM668469  | 112.9  | 119.6  | 0.0060 | 1.19 |
| mapk13  | mitogen-activated protein kinase 13(MAPK13)                                   | NM_002754 | 106.1  | 114.2  | 0.0060 | 1.19 |
| SCLT1   | sodium channel and clathrin linker 1(SCLT1)                                   | NM_144643 | 88.3   | 102    | 0.0060 | 1.24 |
| CRCP    | CGRP receptor component(CRCP)                                                 | NM_014478 | 115.9  | 112.3  | 0.0060 | 1.46 |
| CRCP    | CGRP receptor component(CRCP)                                                 | NM_014478 | 2824.8 | 3977.5 | 0.0060 | 1.46 |
| RBBP5   | RB binding protein 5, histone lysine methyltransferase complex subunit(RBBP5) | NM_005057 | 114.2  | 114    | 0.0060 | 1.11 |
|         |                                                                               | XM_934567 | 123.1  | 126.1  | 0.0060 | 1.16 |
|         |                                                                               | NM_199345 | 148.2  | 185.7  | 0.0060 | 1.42 |
|         |                                                                               | BX105338  | 133    | 194.5  | 0.0060 | 1.65 |

|         |                                                        |              |        |        |        |      |
|---------|--------------------------------------------------------|--------------|--------|--------|--------|------|
| FAM50A  | family with sequence similarity 50 member A(FAM50A)    | NM_004699    | 164.6  | 179.7  | 0.0060 | 1.26 |
|         |                                                        | DB038929     | 143.4  | 110.9  | 0.0060 | 0.84 |
|         |                                                        | XM_001134215 | 124.1  | 116    | 0.0060 | 1.44 |
|         |                                                        | XM_001134215 | 216.9  | 275.7  | 0.0060 | 1.44 |
| S100A13 | S100 calcium binding protein A13(S100A13)              | NM_001024211 | 122.2  | 128.7  | 0.0060 | 0.77 |
| S100A13 | S100 calcium binding protein A13(S100A13)              | NM_001024211 | 170.6  | 116.5  | 0.0060 | 0.77 |
| MTIF2   | mitochondrial translational initiation factor 2(MTIF2) | NM_001005369 | 553.3  | 724.5  | 0.0060 | 1.44 |
| MEIS3P1 | Meis homeobox 3 pseudogene 1(MEIS3P1)                  | NR_002211    | 212.4  | 240.6  | 0.0060 | 1.27 |
|         |                                                        | XM_001128983 | 102.6  | 111    | 0.0060 | 1.19 |
|         |                                                        | XM_001713654 | 6200.5 | 5439.2 | 0.0060 | 0.85 |
| ARHGEF7 | Rho guanine nucleotide exchange factor 7(ARHGEF7)      | NM_145735    | 86.5   | 108.6  | 0.0060 | 1.37 |

|        |                                                                  |              |       |       |        |      |
|--------|------------------------------------------------------------------|--------------|-------|-------|--------|------|
| GCC1   | GRIP and coiled-coil domain containing 1(GCC1)                   | NM_024523    | 193.4 | 216.1 | 0.0060 | 1.28 |
|        |                                                                  | XM_946257    | 101.3 | 107.6 | 0.0060 | 1.17 |
| INTS2  | integrator complex subunit 2(INTS2)                              | NM_020748    | 154.7 | 184.2 | 0.0060 | 1.36 |
| UGGT1  | UDP-glucose glycoprotein glucosyltransferase 1(UGGT1)            | NM_020120    | 119.2 | 151.8 | 0.0060 | 1.44 |
|        |                                                                  | AI905886     | 121.5 | 95.1  | 0.0060 | 0.83 |
|        |                                                                  | AY475219     | 89.2  | 104.7 | 0.0060 | 1.27 |
|        |                                                                  | XM_933437    | 144.3 | 100.8 | 0.0060 | 0.75 |
| PEX11B | peroxisomal biogenesis factor 11 beta(PEX11B)                    | NM_003846    | 506.9 | 289.2 | 0.0060 | 0.65 |
|        |                                                                  | XM_001131379 | 105.3 | 110.6 | 0.0060 | 1.15 |
| RBM6   | RNA binding motif protein 6(RBM6)                                | NM_005777    | 118.2 | 123.5 | 0.0060 | 1.18 |
| NRDE2  | NRDE-2, necessary for RNA interference, domain containing(NRDE2) | NM_017970    | 152.5 | 192.5 | 0.0060 | 1.44 |

|          |                                                        |              |       |       |        |      |
|----------|--------------------------------------------------------|--------------|-------|-------|--------|------|
|          |                                                        | XM_932354    | 142.7 | 107   | 0.0060 | 0.83 |
|          |                                                        | XM_001126418 | 114.3 | 117.8 | 0.0060 | 1.14 |
| C1orf101 | chromosome 1<br>open reading<br>frame<br>101(C1orf101) | NM_173807    | 138.7 | 108   | 0.0060 | 0.85 |
| MTMR14   | myotubularin<br>related protein<br>14(MTMR14)          | NM_001077525 | 133.8 | 139.1 | 0.0060 | 1.25 |
| MTMR14   | myotubularin<br>related protein<br>14(MTMR14)          | NM_001077525 | 169.9 | 186.3 | 0.0060 | 1.25 |
| DDIT4    | DNA damage<br>inducible<br>transcript<br>4(DDIT4)      | NM_019058    | 131.9 | 102.7 | 0.0060 | 0.86 |
| MS4A6A   | membrane<br>spanning 4-<br>domains<br>A6A(MS4A6A)      | NM_022349    | 98.3  | 104.3 | 0.0060 | 1.16 |
| BAGE3    | B melanoma<br>antigen family<br>member<br>3(BAGE3)     | NM_182481    | 87.8  | 97.7  | 0.0060 | 1.19 |
| RNF220   | ring finger protein<br>220(RNF220)                     | NM_018150    | 208   | 238.3 | 0.0060 | 1.3  |

|             |                                                     |                  |        |        |        |      |
|-------------|-----------------------------------------------------|------------------|--------|--------|--------|------|
| PGA3        | pepsinogen 3,<br>group I<br>(pepsinogen<br>A)(PGA3) | NM_00107<br>9807 | 90.1   | 94.4   | 0.0070 | 0.84 |
| PGA3        | pepsinogen 3,<br>group I<br>(pepsinogen<br>A)(PGA3) | NM_00107<br>9807 | 113.2  | 99.3   | 0.0070 | 0.84 |
| PGA3        | pepsinogen 3,<br>group I<br>(pepsinogen<br>A)(PGA3) | NM_00107<br>9807 | 130.2  | 101.7  | 0.0070 | 0.84 |
|             |                                                     | AI911349         | 142.2  | 108.9  | 0.0070 | 0.82 |
| SULT1A<br>1 | sulfotransferase<br>family 1A member<br>1(SULT1A1)  | NM_17753<br>0    | 2668.3 | 3612.2 | 0.0070 | 1.4  |
|             |                                                     | XM_49896<br>9    | 203.5  | 118.8  | 0.0070 | 0.65 |
| HCFC2       | host cell factor<br>C2(HCFC2)                       | NM_01332<br>0    | 110.7  | 116.6  | 0.0070 | 1.16 |
| TMEM2<br>63 | transmembrane<br>protein<br>263(TMEM263)            | NM_15226<br>1    | 93     | 101.2  | 0.0070 | 1.19 |
|             |                                                     | XR_01947<br>1    | 956.6  | 1383.3 | 0.0070 | 1.57 |
| WDR37       | WD repeat<br>domain<br>37(WDR37)                    | NM_01402<br>3    | 121.7  | 139.7  | 0.0070 | 1.29 |

|        |                                                 |              |       |       |        |      |
|--------|-------------------------------------------------|--------------|-------|-------|--------|------|
| WDR37  | WD repeat domain 37(WDR37)                      | NM_014023    | 150.9 | 176.7 | 0.0070 | 1.29 |
| AKAP10 | A-kinase anchoring protein 10(AKAP10)           | NM_007202    | 121.3 | 135.3 | 0.0070 | 1.26 |
|        |                                                 | XM_001716137 | 99.1  | 104.8 | 0.0070 | 1.15 |
| MACF1  | microtubule-actin crosslinking factor 1(MACF1)  | NM_012090    | 101.9 | 113.5 | 0.0070 | 1.23 |
| MACF1  | microtubule-actin crosslinking factor 1(MACF1)  | NM_012090    | 486.3 | 494.9 | 0.0070 | 1.23 |
| GSK3B  | glycogen synthase kinase 3 beta(GSK3B)          | NM_002093    | 234.2 | 260.7 | 0.0070 | 1.25 |
| APH1A  | aph-1 homolog A, gamma-secretase subunit(APH1A) | NM_001077628 | 213.3 | 181   | 0.0070 | 0.77 |
| APH1A  | aph-1 homolog A, gamma-secretase subunit(APH1A) | NM_001077628 | 275.7 | 186.2 | 0.0070 | 0.77 |
| NACC2  | NACC family member 2(NACC2)                     | AK094914     | 443.2 | 275.7 | 0.0070 | 0.69 |
| MGA    | MGA, MAX dimerization protein(MGA)              | NM_001080541 | 102.8 | 104.7 | 0.0070 | 0.85 |



|         |                                                         |              |       |       |        |      |           |      |       |
|---------|---------------------------------------------------------|--------------|-------|-------|--------|------|-----------|------|-------|
| MGA     | MGA, MAX dimerization protein(MGA)                      | NM_001080541 | 155.6 | 117.3 | 0.0070 | 0.85 |           |      |       |
| PPFIBP1 | PPFIA binding protein 1(PPFIBP1)                        | NM_003622    | 99.8  | 114.9 | 0.0070 | 1.25 |           |      |       |
| PPFIBP1 | PPFIA binding protein 1(PPFIBP1)                        | NM_003622    | 111   | 103   | 0.0070 | 1.25 |           |      |       |
| PPFIBP1 | PPFIA binding protein 1(PPFIBP1)                        | NM_003622    | 168.4 | 124   | 0.0070 | 1.25 |           |      |       |
| ZNF654  | zinc finger protein 654(ZNF654)                         | NM_018293    | 89.3  | 100   | 0.0070 | 1.21 | NM_144744 | 0.11 | 40.01 |
| ZNF654  | zinc finger protein 654(ZNF654)                         | NM_018293    | 102   | 94.7  | 0.0070 | 1.21 |           |      |       |
| ZNF654  | zinc finger protein 654(ZNF654)                         | NM_018293    | 102.6 | 101.7 | 0.0070 | 1.21 |           |      |       |
| ZNF654  | zinc finger protein 654(ZNF654)                         | NM_018293    | 102.6 | 105.3 | 0.0070 | 1.21 |           |      |       |
|         |                                                         | BQ447196     | 99.1  | 104.7 | 0.0070 | 1.15 |           |      |       |
|         |                                                         | AA430240     | 92.9  | 100.6 | 0.0070 | 1.16 |           |      |       |
| OR2G2   | olfactory receptor family 2 subfamily G member 2(OR2G2) | NM_001001915 | 148.6 | 101   | 0.0070 | 0.74 |           |      |       |
|         |                                                         | XM_001723369 | 125.5 | 102.3 | 0.0070 | 0.88 |           |      |       |
| ZMYND11 | zinc finger MYND-type containing 11(ZMYND11)            | NM_006624    | 93.7  | 91.5  | 0.0070 | 1.3  |           |      |       |

|         |                                                         |              |        |        |        |      |
|---------|---------------------------------------------------------|--------------|--------|--------|--------|------|
| ZMYND11 | zinc finger MYND-type containing 11(ZMYND11)            | NM_006624    | 1043.1 | 1211.7 | 0.0070 | 1.3  |
|         |                                                         | XR_039357    | 101    | 114.2  | 0.0070 | 1.24 |
|         |                                                         | AK024852     | 109.8  | 145    | 0.0070 | 1.5  |
| FXVD5   | FXVD domain containing ion transport regulator 5(FXVD5) | NM_144779    | 103.4  | 180.9  | 0.0070 | 1.14 |
| FXVD5   | FXVD domain containing ion transport regulator 5(FXVD5) | NM_144779    | 109.4  | 113    | 0.0070 | 1.14 |
| DUX4L1  | double homeobox 4 like 1(DUX4L1)                        | NM_033178    | 113.3  | 97.3   | 0.0070 | 0.93 |
| EIF5A   | eukaryotic translation initiation factor 5A(EIF5A)      | NM_001970    | 412.5  | 457.4  | 0.0070 | 1.26 |
| sorbs1  | sorbin and SH3 domain containing 1(SORBS1)              | NM_001034954 | 101.8  | 108.2  | 0.0070 | 1.16 |
| sorbs1  | sorbin and SH3 domain containing 1(SORBS1)              | NM_001034954 | 260.9  | 275.7  | 0.0070 | 1.16 |

|         |                                                                           |              |       |       |        |      |
|---------|---------------------------------------------------------------------------|--------------|-------|-------|--------|------|
| SELENOP | selenoprotein P(SELENOP)                                                  | NM_005410    | 116.2 | 85.6  | 0.0070 | 0.79 |
| CCL25   | C-C motif chemokine ligand 25(CCL25)                                      | NM_005624    | 152.6 | 112.7 | 0.0070 | 0.82 |
| STX16   | syntaxin 16(STX16)                                                        | NM_001001433 | 137.2 | 167   | 0.0070 | 1.39 |
| STX16   | syntaxin 16(STX16)                                                        | NM_001001433 | 288.6 | 381.4 | 0.0070 | 1.39 |
|         |                                                                           | XR_039439    | 110.9 | 86.2  | 0.0080 | 0.81 |
|         |                                                                           | XR_039439    | 649.4 | 557.2 | 0.0080 | 0.81 |
| EXTL2   | exostosin like glycosyltransferase 2(EXTL2)                               | NM_001033025 | 148.9 | 170.7 | 0.0080 | 1.29 |
| ALX3    | ALX homeobox 3(ALX3)                                                      | NM_006492    | 121.1 | 106.9 | 0.0080 | 0.85 |
| ALX3    | ALX homeobox 3(ALX3)                                                      | NM_006492    | 132.8 | 105.6 | 0.0080 | 0.85 |
| MPPE1   | metallophosphoesterase 1(MPPE1)                                           | NM_023075    | 161   | 194.9 | 0.0080 | 1.38 |
| MCM3AP  | minichromosome maintenance complex component 3 associated protein(MCM3AP) | NM_003906    | 101.4 | 107.7 | 0.0080 | 1.18 |

|         |                                                           |              |       |       |        |      |
|---------|-----------------------------------------------------------|--------------|-------|-------|--------|------|
| OR2B11  | olfactory receptor family 2 subfamily B member 11(OR2B11) | NM_001004492 | 131.4 | 101.4 | 0.0080 | 0.83 |
| OCIAD2  | OCIA domain containing 2(OCIAD2)                          | NM_152398    | 147.5 | 101.9 | 0.0080 | 0.74 |
| spop    | speckle type BTB/POZ protein(SPOP)                        | NM_001007230 | 556.6 | 727.7 | 0.0080 | 1.48 |
| ADGRG2  | adhesion G protein-coupled receptor G2(ADGRG2)            | NM_001079859 | 96.3  | 103.4 | 0.0080 | 1.15 |
| CYP11A1 | cytochrome P450 family 11 subfamily A member 1(CYP11A1)   | NM_000781    | 145.6 | 113.6 | 0.0080 | 0.86 |
|         |                                                           | XM_937648    | 134.9 | 106.7 | 0.0080 | 0.85 |
| ZC2HC1A | zinc finger C2HC-type containing 1A(ZC2HC1A)              | NM_016010    | 101.2 | 106.2 | 0.0080 | 1.38 |
| ZC2HC1A | zinc finger C2HC-type containing 1A(ZC2HC1A)              | NM_016010    | 126.1 | 152   | 0.0080 | 1.38 |
| TLR2    | toll like receptor 2(TLR2)                                | NM_003264    | 98.5  | 127.1 | 0.0080 | 1.45 |
| tcf20   | transcription factor 20(TCF20)                            | NM_181492    | 107.8 | 101   | 0.0080 | 1.38 |

|          |                                                                                     |               |       |        |        |      |
|----------|-------------------------------------------------------------------------------------|---------------|-------|--------|--------|------|
| tcf20    | transcription factor<br>20(TCF20)                                                   | NM_18149<br>2 | 242.8 | 304.4  | 0.0080 | 1.38 |
|          |                                                                                     | XM_92613<br>0 | 110.9 | 141.1  | 0.0080 | 1.44 |
| USP33    | ubiquitin specific<br>peptidase<br>33(USP33)                                        | NM_01501<br>7 | 102.4 | 117.1  | 0.0080 | 1.27 |
| ZNF565   | zinc finger protein<br>565(ZNF565)                                                  | NM_15247<br>7 | 116.1 | 127.7  | 0.0080 | 1.23 |
| ZNF565   | zinc finger protein<br>565(ZNF565)                                                  | NM_15247<br>7 | 121   | 127.7  | 0.0080 | 1.23 |
| POU2F1   | POU class 2<br>homeobox<br>1(POU2F1)                                                | NM_00269<br>7 | 98.3  | 114.2  | 0.0080 | 1.27 |
| hist1h4c | histone cluster 1<br>H4 family member<br>c(HIST1H4C)                                | NM_00354<br>2 | 397.6 | 1481.1 | 0.0080 | 3.75 |
| CNNM3    | cyclin and CBS<br>domain divalent<br>metal cation<br>transport mediator<br>3(CNNM3) | NM_01762<br>3 | 108.2 | 93.2   | 0.0080 | 1.2  |
| CNNM3    | cyclin and CBS<br>domain divalent<br>metal cation<br>transport mediator<br>3(CNNM3) | NM_01762<br>3 | 110.7 | 121.7  | 0.0080 | 1.2  |

|        |                                                                           |              |       |       |        |      |
|--------|---------------------------------------------------------------------------|--------------|-------|-------|--------|------|
| FBXW2  | F-box and WD repeat domain containing 2(FBXW2)                            | NM_012164    | 115.3 | 135.4 | 0.0080 | 1.34 |
| PHF14  | PHD finger protein 14(PHF14)                                              | NM_014660    | 120.2 | 100.5 | 0.0080 | 0.91 |
| FOXJ2  | forkhead box J2(FOXJ2)                                                    | NM_018416    | 431.6 | 548   | 0.0080 | 1.47 |
| or8g1  | olfactory receptor family 8 subfamily G member 1 (gene/pseudogene)(OR8G1) | NM_001002905 | 111.3 | 90.1  | 0.0080 | 0.85 |
| SKP2   | S-phase kinase associated protein 2(SKP2)                                 | NM_032637    | 104.4 | 113.8 | 0.0090 | 1.21 |
|        |                                                                           | XR_017962    | 118.5 | 98.1  | 0.0090 | 0.84 |
|        |                                                                           | XR_017962    | 129.4 | 99.9  | 0.0090 | 0.84 |
|        |                                                                           | XR_039678    | 126.8 | 92.9  | 0.0090 | 0.79 |
| MAGEB1 | MAGE family member B1(MAGEB1)                                             | NM_002363    | 131.2 | 101.1 | 0.0090 | 0.84 |
| FMC1   | formation of mitochondrial complex V assembly factor 1 homolog(FMC1)      | NM_197964    | 268.8 | 199.6 | 0.0090 | 1.43 |

|          |                                                                      |              |        |        |        |      |
|----------|----------------------------------------------------------------------|--------------|--------|--------|--------|------|
| FMC1     | formation of mitochondrial complex V assembly factor 1 homolog(FMC1) | NM_197964    | 1082.9 | 1361.3 | 0.0090 | 1.43 |
| FMC1     | formation of mitochondrial complex V assembly factor 1 homolog(FMC1) | NM_197964    | 1369.2 | 870    | 0.0090 | 1.43 |
| ERGIC1   | endoplasmic reticulum-golgi intermediate compartment 1(ERGIC1)       | NM_001031711 | 171.4  | 196.6  | 0.0090 | 1.31 |
| LMBRD2   | LMBR1 domain containing 2(LMBRD2)                                    | NM_001007527 | 112.2  | 121.7  | 0.0090 | 1.19 |
| BPIFA3   | BPI fold containing family A member 3(BPIFA3)                        | NM_178466    | 92.5   | 98.6   | 0.0090 | 1.14 |
| HLA-DQA2 | major histocompatibility complex, class II, DQ alpha 2(HLA-DQA2)     | NM_020056    | 147.6  | 114.8  | 0.0090 | 0.86 |
| ZBED5    | zinc finger BED-type containing 5(ZBED5)                             | NM_021211    | 286.7  | 329.4  | 0.0090 | 1.55 |

|         |                                                            |              |        |        |        |      |
|---------|------------------------------------------------------------|--------------|--------|--------|--------|------|
| ZBED5   | zinc finger BED-type containing 5(ZBED5)                   | NM_021211    | 496.9  | 685.8  | 0.0090 | 1.55 |
| CLPTM1L | CLPTM1 like(CLPTM1L)                                       | NM_030782    | 222.8  | 269.7  | 0.0090 | 1.42 |
| SMOC1   | SPARC related modular calcium binding 1(SMOC1)             | NM_001034852 | 114.4  | 101.6  | 0.0090 | 0.81 |
| SMOC1   | SPARC related modular calcium binding 1(SMOC1)             | NM_001034852 | 118.7  | 90.2   | 0.0090 | 0.81 |
| RPS26   | ribosomal protein S26(RPS26)                               | NM_001029    | 89.2   | 93     | 0.0090 | 1.11 |
| RPS26   | ribosomal protein S26(RPS26)                               | NM_001029    | 1360.8 | 1438.4 | 0.0090 | 1.11 |
| FDPS    | farnesyl diphosphate synthase(FDPS)                        | NM_002004    | 142.8  | 160.3  | 0.0090 | 1.25 |
|         |                                                            | NM_020231    | 221.5  | 330.2  | 0.0090 | 1.68 |
| ZZEF1   | zinc finger ZZ-type and EF-hand domain containing 1(ZZEF1) | NM_015113    | 210.3  | 255.3  | 0.0090 | 1.39 |
| KLHL9   | kelch like family member 9(KLHL9)                          | NM_018847    | 404.9  | 500.1  | 0.0090 | 1.39 |



|          |                                                                                                           |              |       |       |        |      |
|----------|-----------------------------------------------------------------------------------------------------------|--------------|-------|-------|--------|------|
| C1orf137 | chromosome 1<br>open reading<br>frame<br>137(C1orf137)                                                    | NM_001013643 | 142.2 | 106.9 | 0.0090 | 0.83 |
| UGDH     | UDP-glucose 6-<br>dehydrogenase(U<br>GDH)                                                                 | NM_003359    | 122.4 | 92.2  | 0.0090 | 0.81 |
| BDP1     | B double prime 1,<br>subunit of RNA<br>polymerase III<br>transcription<br>initiation factor<br>IIIB(BDP1) | NM_018429    | 118.1 | 120.3 | 0.0090 | 1.14 |
| GABBR1   | gamma-<br>aminobutyric acid<br>type B receptor<br>subunit<br>1(GABBR1)                                    | NM_021905    | 100.3 | 104.8 | 0.0090 | 1.14 |
| GABBR1   | gamma-<br>aminobutyric acid<br>type B receptor<br>subunit<br>1(GABBR1)                                    | NM_021905    | 105.7 | 108.6 | 0.0090 | 1.14 |
|          |                                                                                                           | XR_038461    | 100   | 108.1 | 0.0090 | 1.17 |
| ercc1    | ERCC excision<br>repair 1,<br>endonuclease<br>non-catalytic<br>subunit(ERCC1)                             | NM_001983    | 108   | 100.1 | 0.0090 | 1.33 |

|          |                                                                   |           |        |        |        |      |
|----------|-------------------------------------------------------------------|-----------|--------|--------|--------|------|
| ercc1    | ERCC excision repair 1, endonuclease non-catalytic subunit(ERCC1) | NM_001983 | 165.3  | 196.6  | 0.0090 | 1.33 |
| ercc1    | ERCC excision repair 1, endonuclease non-catalytic subunit(ERCC1) | NM_001983 | 177.3  | 179.5  | 0.0090 | 1.33 |
| UBE2D3   | ubiquitin conjugating enzyme E2 D3(UBE2D3)                        | NM_181890 | 1309.4 | 1623.6 | 0.0090 | 1.36 |
| UBE2D3   | ubiquitin conjugating enzyme E2 D3(UBE2D3)                        | NM_181890 | 1649.2 | 2032.9 | 0.0090 | 1.36 |
| WDR20    | WD repeat domain 20(WDR20)                                        | NM_144574 | 124.1  | 97.5   | 0.0090 | 0.82 |
| GRIA3    | glutamate ionotropic receptor AMPA type subunit 3(GRIA3)          | NM_181894 | 94.1   | 101    | 0.0090 | 1.16 |
|          |                                                                   | AW051978  | 132.7  | 106.3  | 0.0090 | 0.87 |
| TMEM184C | transmembrane protein 184C(TMEM184C)                              | NM_018241 | 99.6   | 103.1  | 0.0100 | 1.11 |

|          |                                                                                 |              |       |       |        |      |
|----------|---------------------------------------------------------------------------------|--------------|-------|-------|--------|------|
| TMEM184C | transmembrane protein 184C(TMEM184C)                                            | NM_018241    | 289.7 | 256.8 | 0.0100 | 1.11 |
| KEAP1    | kelch like ECH associated protein 1(KEAP1)                                      | NM_0122289   | 211.3 | 176.5 | 0.0100 | 0.75 |
| KEAP1    | kelch like ECH associated protein 1(KEAP1)                                      | NM_0122289   | 311.4 | 210.9 | 0.0100 | 0.75 |
| POMGNT2  | protein O-linked mannose N-acetylglucosaminyltransferase 2 (beta 1,4-)(POMGNT2) | NM_032806    | 234.8 | 141.8 | 0.0100 | 0.68 |
|          |                                                                                 | XM_929444    | 151.3 | 114.8 | 0.0100 | 0.85 |
| RBM3     | RNA binding motif (RNP1, RRM) protein 3(RBM3)                                   | NM_001017430 | 105.3 | 112.6 | 0.0100 | 1.46 |
| RBM3     | RNA binding motif (RNP1, RRM) protein 3(RBM3)                                   | NM_001017430 | 167.5 | 208.4 | 0.0100 | 1.46 |
| BEND6    | BEN domain containing 6(BEND6)                                                  | NM_152731    | 93.3  | 101.8 | 0.0100 | 1.19 |

|        |                                                               |              |       |       |        |      |           |       |      |
|--------|---------------------------------------------------------------|--------------|-------|-------|--------|------|-----------|-------|------|
| BEND6  | BEN domain containing 6(BEND6)                                | NM_152731    | 98.5  | 99    | 0.0100 | 1.19 |           |       |      |
|        |                                                               | XM_001714670 | 131.9 | 144.9 | 0.0100 | 1.25 |           |       |      |
|        |                                                               | XM_001126202 | 146.5 | 194.1 | 0.0100 | 1.51 |           |       |      |
|        |                                                               | XM_945223    | 118   | 95.1  | 0.0100 | 0.87 |           |       |      |
| trak1  | trafficking kinesin protein 1(TRAK1)                          | NM_001042646 | 106.4 | 114.6 | 0.0100 | 1.18 |           |       |      |
| trak1  | trafficking kinesin protein 1(TRAK1)                          | NM_001042646 | 160.3 | 131.9 | 0.0100 | 1.18 |           |       |      |
| TCEAL9 | transcription elongation factor A like 9(TCEAL9)              | NM_001006612 | 142.1 | 167.3 | 0.0100 | 1.39 |           |       |      |
|        |                                                               | XM_939730    | 126   | 98.3  | 0.0100 | 0.85 |           |       |      |
| SNHG3  | small nucleolar RNA host gene 3(SNHG3)                        | NR_002909    | 120.3 | 96.7  | 0.0100 | 0.87 | NM_017196 | 14.73 | 0.69 |
| fsd1l  | fibronectin type III and SPRY domain containing 1 like(FSD1L) | NM_207647    | 102.8 | 111.3 | 0.0100 | 1.18 | NM_017196 | 14.73 | 0.69 |
| fsd1l  | fibronectin type III and SPRY domain containing 1 like(FSD1L) | NM_207647    | 126   | 108.7 | 0.0100 | 1.18 | NM_017196 | 14.73 | 0.69 |

|        |                                                          |              |       |       |        |      |           |      |       |
|--------|----------------------------------------------------------|--------------|-------|-------|--------|------|-----------|------|-------|
| CGGBP1 | CGG triplet repeat binding protein 1(CGGBP1)             | NM_003663    | 599.8 | 867.6 | 0.0100 | 1.58 |           |      |       |
|        |                                                          | BX106221     | 124.5 | 102   | 0.0100 | 0.9  |           |      |       |
|        |                                                          | XM_945918    | 141   | 107.1 | 0.0100 | 0.83 |           |      |       |
| NUTF2  | nuclear transport factor 2(NUTF2)                        | NM_005796    | 117.6 | 137.9 | 0.0100 | 1.31 | NM_031356 | 5.43 | 24.53 |
|        |                                                          | XM_001714845 | 110.4 | 92.4  | 0.0100 | 0.87 | NM_031356 | 5.43 | 24.53 |
| TARBP2 | TARBP2, RISC loading complex RNA binding subunit(TARBP2) | NM_134323    | 100   | 107.1 | 0.0100 | 1.17 |           |      |       |
| FBXO2  | F-box protein 2(FBXO2)                                   | NM_012168    | 216.3 | 144   | 0.0100 | 0.75 |           |      |       |
| CYB561 | cytochrome b561(CYB561)                                  | NM_001017917 | 111.9 | 114.3 | 0.0100 | 1.14 |           |      |       |
| IFT88  | intraflagellar transport 88(IFT88)                       | NM_175605    | 90.9  | 102.1 | 0.0100 | 1.21 |           |      |       |
| CARF   | calcium responsive transcription factor(CARF)            | NM_024744    | 103.2 | 106   | 0.0100 | 1.12 |           |      |       |
| CLIC5  | chloride intracellular channel 5(CLIC5)                  | NM_016929    | 196.4 | 347.5 | 0.0100 | 2    |           |      |       |
|        |                                                          | AA705831     | 119.7 | 100.3 | 0.0100 | 0.89 |           |      |       |

|             |                                                                  |                  |         |         |        |      |               |       |      |
|-------------|------------------------------------------------------------------|------------------|---------|---------|--------|------|---------------|-------|------|
|             |                                                                  | XR_01760<br>1    | 136.4   | 109.8   | 0.0100 | 0.89 |               |       |      |
|             |                                                                  | CN283269         | 135     | 110.1   | 0.0100 | 0.9  |               |       |      |
|             |                                                                  | XM_94207<br>1    | 156.1   | 111.3   | 0.0110 | 0.79 |               |       |      |
|             |                                                                  | XM_00172<br>6941 | 118.7   | 96.5    | 0.0110 | 0.88 |               |       |      |
| EFNA4       | ephrin A4(EFNA4)                                                 | NM_18268<br>9    | 99.5    | 102.7   | 0.0110 | 1.13 |               |       |      |
| APOPT1      | apoptogenic 1,<br>mitochondrial(AP<br>OPT1)                      | NM_03237<br>4    | 1681.1  | 2076.8  | 0.0110 | 1.31 |               |       |      |
|             |                                                                  | AI082160         | 151     | 116.3   | 0.0110 | 0.85 |               |       |      |
|             |                                                                  | XM_00113<br>2307 | 119.6   | 95.6    | 0.0110 | 0.85 | NM_0171<br>35 | 41.45 | 2.88 |
|             |                                                                  | XM_00171<br>3723 | 18151.9 | 14953.9 | 0.0110 | 0.81 | NM_0171<br>35 | 41.45 | 2.88 |
| RERE        | arginine-glutamic<br>acid dipeptide<br>repeats(RERE)             | NM_01210<br>2    | 293.4   | 307.3   | 0.0110 | 1.18 | NM_0171<br>35 | 41.45 | 2.88 |
| ADPRH<br>L1 | ADP-<br>ribosylhydrolase<br>like 1(ADPRHL1)                      | NM_13843<br>0    | 145.2   | 117.4   | 0.0110 | 0.89 | NM_0171<br>35 | 41.45 | 2.88 |
| VEZT        | vezatin, adherens<br>junctions<br>transmembrane<br>protein(VEZT) | NM_01759<br>9    | 194.2   | 251     | 0.0110 | 1.44 |               |       |      |
| BARD1       | BRCA1<br>associated RING<br>domain 1(BARD1)                      | NM_00046<br>5    | 98.6    | 130.8   | 0.0110 | 1.47 |               |       |      |

|              |                                                |           |       |       |        |      |              |       |      |
|--------------|------------------------------------------------|-----------|-------|-------|--------|------|--------------|-------|------|
| MYO1C        | myosin IC(MYO1C)                               | NM_033375 | 146.8 | 113.7 | 0.0110 | 0.86 |              |       |      |
| FBXW5        | F-box and WD repeat domain containing 5(FBXW5) | NM_018998 | 95    | 101   | 0.0110 | 1.15 |              |       |      |
| AUP1         | ancient ubiquitous protein 1(AUP1)             | NM_181575 | 227.6 | 268.1 | 0.0110 | 1.31 |              |       |      |
| mri1         | methylthioribose-1-phosphate isomerase 1(MRI1) | NM_032285 | 122.7 | 138.6 | 0.0110 | 1.28 |              |       |      |
|              |                                                | BX108993  | 114.4 | 91.9  | 0.0110 | 0.84 | NM_001033653 | 43.46 | 1.56 |
|              |                                                | BE465760  | 192.4 | 102   | 0.0110 | 0.54 |              |       |      |
| ZNF341       | zinc finger protein 341(ZNF341)                | NM_032819 | 94.6  | 106.8 | 0.0110 | 1.24 |              |       |      |
| RYBP         | RING1 and YY1 binding protein(RYBP)            | NM_012234 | 340.3 | 521.8 | 0.0110 | 1.73 |              |       |      |
|              |                                                | NR_004402 | 108.4 | 114.4 | 0.0110 | 1.16 |              |       |      |
| LOC105376064 | uncharacterized LOC105376064(LOC105376064)     | AW205071  | 201.8 | 129.1 | 0.0110 | 0.73 |              |       |      |
| WDFY2        | WD repeat and FYVE domain containing 2(WDFY2)  | NM_052950 | 121.4 | 135.6 | 0.0110 | 1.25 |              |       |      |

|         |                                                                      |           |        |       |        |      |
|---------|----------------------------------------------------------------------|-----------|--------|-------|--------|------|
| NDUFB11 | NADH:ubiquinone oxidoreductase subunit B11(NDUFB11)                  | NM_019056 | 1103.5 | 755.4 | 0.0120 | 0.78 |
| NEUROG3 | neurogenin 3(NEUROG3)                                                | NM_020999 | 174.3  | 121.5 | 0.0120 | 0.78 |
| TNFSF14 | tumor necrosis factor superfamily member 14(TNFSF14)                 | NM_003807 | 89     | 96.3  | 0.0120 | 1.15 |
| SCYL1   | SCY1 like pseudokinase 1(SCYL1)                                      | NM_020680 | 172.9  | 156   | 0.0120 | 1.22 |
| SCYL1   | SCY1 like pseudokinase 1(SCYL1)                                      | NM_020680 | 174.8  | 182.8 | 0.0120 | 1.22 |
| KCNG2   | potassium voltage-gated channel modifier subfamily G member 2(KCNG2) | NM_012283 | 95.5   | 100.2 | 0.0120 | 1.14 |
| CNOT6L  | CCR4-NOT transcription complex subunit 6 like(CNOT6L)                | NM_144571 | 131.2  | 163.4 | 0.0120 | 1.37 |
| CSF1    | colony stimulating factor 1(CSF1)                                    | NM_172212 | 113.9  | 93.2  | 0.0120 | 0.87 |
|         |                                                                      | XR_041749 | 223.6  | 118   | 0.0120 | 0.6  |



|        |                                                          |              |        |         |        |      |           |             |
|--------|----------------------------------------------------------|--------------|--------|---------|--------|------|-----------|-------------|
|        |                                                          | BX102609     | 122.5  | 97.7    | 0.0120 | 0.87 |           |             |
| ASS1   | argininosuccinate synthase 1(ASS1)                       | NM_000050    | 127.4  | 94      | 0.0120 | 0.81 |           |             |
| ASS1   | argininosuccinate synthase 1(ASS1)                       | NM_000050    | 1505.7 | 823.6   | 0.0120 | 0.81 |           |             |
| PPARD  | peroxisome proliferator activated receptor delta(PPARD)  | NM_006238    | 94.5   | 98      | 0.0120 | 0.84 |           |             |
| PPARD  | peroxisome proliferator activated receptor delta(PPARD)  | NM_006238    | 129.7  | 102.3   | 0.0120 | 0.84 |           |             |
| PTPN9  | protein tyrosine phosphatase, non-receptor type 9(PTPN9) | NM_002833    | 104    | 108     | 0.0120 | 1.13 |           |             |
| CEP164 | centrosomal protein 164(CEP164)                          | NM_014956    | 133.7  | 141.7   | 0.0120 | 1.22 | NM_134407 | 50.47 11.16 |
| NIN    | ninein(NIN)                                              | NM_020921    | 118.1  | 136.9   | 0.0120 | 1.31 |           |             |
| F2R    | coagulation factor II thrombin receptor(F2R)             | NM_001992    | 16746  | 18218.7 | 0.0120 | 1.21 |           |             |
| ACADVL | acyl-CoA dehydrogenase, very long chain(ACADVL)          | NM_001033859 | 174.1  | 121.1   | 0.0120 | 0.79 |           |             |

|            |                                                               |               |       |       |        |      |
|------------|---------------------------------------------------------------|---------------|-------|-------|--------|------|
| RCN3       | reticulocalbin<br>3(RCN3)<br>RNA                              | NM_02065<br>0 | 151.3 | 117.6 | 0.0120 | 0.86 |
| RPUSD<br>4 | pseudouridylate<br>synthase domain<br>containing<br>4(RPUSD4) | NM_03279<br>5 | 117.1 | 123.5 | 0.0120 | 1.19 |
|            |                                                               | NR_02426<br>6 | 118.5 | 126.6 | 0.0120 | 1.2  |
|            |                                                               | NM_13892<br>6 | 157.8 | 211.4 | 0.0120 | 1.48 |
| PCIF1      | PDX1 C-terminal<br>inhibiting factor<br>1(PCIF1)              | NM_02210<br>4 | 113.3 | 120.8 | 0.0120 | 1.21 |
| ST5        | suppression of<br>tumorigenicity<br>5(ST5)                    | NM_13915<br>7 | 92.1  | 100.5 | 0.0120 | 1.17 |
| ST5        | suppression of<br>tumorigenicity<br>5(ST5)                    | NM_13915<br>7 | 120.2 | 119.8 | 0.0120 | 1.17 |
| NRXN2      | neurexin<br>2(NRXN2)                                          | NM_13873<br>4 | 127.5 | 128.6 | 0.0120 | 0.85 |
| NRXN2      | neurexin<br>2(NRXN2)                                          | NM_13873<br>4 | 159.3 | 121.3 | 0.0120 | 0.85 |
| HMGXB<br>4 | HMG-box<br>containing<br>4(HMGXB4)                            | NM_00548<br>7 | 107.8 | 99.7  | 0.0120 | 1.17 |
| HMGXB<br>4 | HMG-box<br>containing<br>4(HMGXB4)                            | NM_00548<br>7 | 113.4 | 120.2 | 0.0120 | 1.17 |

|              |                                                             |                  |        |        |        |      |                  |            |
|--------------|-------------------------------------------------------------|------------------|--------|--------|--------|------|------------------|------------|
|              |                                                             | XM_94208<br>6    | 98.5   | 107.6  | 0.0120 | 1.18 |                  |            |
| TIA1         | TIA1 cytotoxic granule associated RNA binding protein(TIA1) | NM_02217<br>3    | 267.7  | 432.7  | 0.0120 | 1.82 |                  |            |
| CDK5R<br>AP2 | CDK5 regulatory subunit associated protein 2(CDK5RAP2)      | NM_00101<br>1649 | 122.1  | 150.1  | 0.0120 | 1.39 | NM_0010<br>33706 | 2.42 10.86 |
| TCOF1        | treacle ribosome biogenesis factor 1(TCOF1)                 | NM_00035<br>6    | 145.9  | 109.5  | 0.0120 | 0.83 |                  |            |
| RNU6-1       | RNA, U6 small nuclear 1(RNU6-1)                             | NR_00439<br>4    | 1021.3 | 1283.5 | 0.0120 | 1.39 |                  |            |
| SNX5         | sorting nexin 5(SNX5)                                       | NM_01442<br>6    | 165.7  | 204.2  | 0.0120 | 1.41 |                  |            |
| LRP4         | LDL receptor related protein 4(LRP4)                        | NM_00233<br>4    | 98.8   | 114.9  | 0.0120 | 1.28 |                  |            |
| SLTM         | SAFB like transcription modulator(SLTM)                     | NM_02475<br>5    | 110.5  | 132.4  | 0.0120 | 1.32 |                  |            |
| SLTM         | SAFB like transcription modulator(SLTM)                     | NM_02475<br>5    | 334.1  | 342.5  | 0.0120 | 1.32 | NM_1533<br>00    | 0.14 61.17 |

|              |                                                                      |                  |       |       |        |      |               |             |
|--------------|----------------------------------------------------------------------|------------------|-------|-------|--------|------|---------------|-------------|
| SLC6A1<br>0P | solute carrier<br>family 6 member<br>10,<br>pseudogene(SLC<br>6A10P) | NR_00308<br>3    | 184.2 | 120.9 | 0.0130 | 0.7  |               |             |
| DCAF13       | DDB1 and CUL4<br>associated factor<br>13(DCAF13)                     | NM_01542<br>0    | 157.5 | 169.6 | 0.0130 | 1.23 | NM_0324<br>16 | 108.51 1.87 |
| FAM63A       | family with<br>sequence<br>similarity 63<br>member<br>A(FAM63A)      | NM_01837<br>9    | 119.6 | 110   | 0.0130 | 1.41 |               |             |
| FAM63A       | family with<br>sequence<br>similarity 63<br>member<br>A(FAM63A)      | NM_01837<br>9    | 539   | 672.1 | 0.0130 | 1.41 |               |             |
|              |                                                                      | XM_00113<br>3026 | 591.5 | 817.8 | 0.0130 | 1.59 |               |             |
|              |                                                                      | XM_00113<br>4374 | 115.9 | 94.1  | 0.0130 | 0.86 |               |             |
|              |                                                                      | AI887987         | 94.6  | 100.2 | 0.0130 | 1.13 |               |             |
| rab41        | RAB41, member<br>RAS oncogene<br>family(RAB41)                       | NM_00103<br>2726 | 159.4 | 118.4 | 0.0130 | 0.83 |               |             |
| CT45A6       | cancer/testis<br>antigen family 45<br>member<br>A6(CT45A6)           | NM_00101<br>7438 | 119.5 | 95.1  | 0.0130 | 0.87 |               |             |

|        |                                                                            |                  |       |       |        |      |                  |       |      |
|--------|----------------------------------------------------------------------------|------------------|-------|-------|--------|------|------------------|-------|------|
|        |                                                                            | XM_93952<br>1    | 103.3 | 105.4 | 0.0130 | 1.11 |                  |       |      |
| RNF150 | ring finger protein<br>150(RNF150)                                         | NM_02072<br>4    | 104.9 | 151.1 | 0.0130 | 1.63 |                  |       |      |
| KAZN   | kazrin, periplakin<br>interacting<br>protein(KAZN)                         | NM_00101<br>7999 | 114.1 | 116.3 | 0.0130 | 1.12 |                  |       |      |
| ACKR3  | atypical<br>chemokine<br>receptor<br>3(ACKR3)                              | NM_00104<br>7841 | 152.2 | 225.8 | 0.0130 | 1.68 |                  |       |      |
| BAIAP2 | BAI1 associated<br>protein 2(BAIAP2)                                       | NM_00634<br>0    | 123.1 | 97    | 0.0130 | 0.86 |                  |       |      |
| BAIAP2 | BAI1 associated<br>protein 2(BAIAP2)                                       | NM_00634<br>0    | 183   | 133.2 | 0.0130 | 0.86 | NM_0011<br>91088 | 10.07 | 0.03 |
|        |                                                                            | XM_00113<br>1851 | 121.6 | 131.7 | 0.0130 | 1.21 | NM_0011<br>91088 | 10.07 | 0.03 |
| ZAP70  | zeta chain of T<br>cell receptor<br>associated protein<br>kinase 70(ZAP70) | NM_00107<br>9    | 93.7  | 140   | 0.0130 | 0.83 |                  |       |      |
| ZAP70  | zeta chain of T<br>cell receptor<br>associated protein<br>kinase 70(ZAP70) | NM_00107<br>9    | 157.2 | 117.9 | 0.0130 | 0.83 |                  |       |      |
|        |                                                                            | XR_03859<br>7    | 334.9 | 402.6 | 0.0130 | 1.39 |                  |       |      |

|         |                                                           |              |         |         |        |      |           |         |      |
|---------|-----------------------------------------------------------|--------------|---------|---------|--------|------|-----------|---------|------|
| GABBR1  | gamma-aminobutyric acid type B receptor subunit 1(GABBR1) | NM_021903    | 130.2   | 105.2   | 0.0130 | 0.88 | NM_012496 | 1095.39 | 8.76 |
|         |                                                           | XM_942516    | 110.1   | 91.9    | 0.0130 | 0.89 |           |         |      |
| ZNF787  | zinc finger protein 787(ZNF787)                           | NM_001002836 | 160.4   | 166.5   | 0.0130 | 1.17 |           |         |      |
|         |                                                           | XR_016353    | 118.7   | 91.6    | 0.0130 | 0.83 |           |         |      |
| SRSF4   | serine and arginine rich splicing factor 4(SRSF4)         | NM_005626    | 813.3   | 1029.5  | 0.0130 | 1.4  |           |         |      |
| CSNK2A1 | casein kinase 2 alpha 1(CSNK2A1)                          | NM_001895    | 133.1   | 136.4   | 0.0130 | 0.78 |           |         |      |
| CSNK2A1 | casein kinase 2 alpha 1(CSNK2A1)                          | NM_001895    | 270     | 185.3   | 0.0130 | 0.78 |           |         |      |
|         |                                                           | XM_001723239 | 13523.8 | 15446.4 | 0.0130 | 1.22 |           |         |      |
|         |                                                           | XR_017532    | 190.2   | 214.7   | 0.0130 | 1.28 |           |         |      |
|         |                                                           | XM_935540    | 97.3    | 107     | 0.0130 | 1.18 |           |         |      |

|            |                                                             |              |       |       |        |      |
|------------|-------------------------------------------------------------|--------------|-------|-------|--------|------|
| KCNH2      | potassium voltage-gated channel subfamily H member 2(KCNH2) | NM_172056    | 108.7 | 111.7 | 0.0130 | 1.14 |
|            |                                                             | BX107471     | 114.9 | 92.6  | 0.0130 | 0.86 |
| FAM208A    | family with sequence similarity 208 member A(FAM208A)       | NM_015224    | 337   | 175.6 | 0.0140 | 0.61 |
| LOC729609  | uncharacterized LOC729609(LOC729609)                        | NR_024440    | 115.3 | 93.9  | 0.0140 | 0.88 |
| RNF5       | ring finger protein 5(RNF5)                                 | NM_006913    | 537.7 | 347.2 | 0.0140 | 0.74 |
| HS6ST2-AS1 | HS6ST2 antisense RNA 1(HS6ST2-AS1)                          | BQ001311     | 115.6 | 95.2  | 0.0140 | 0.88 |
| THOP1      | thimet oligopeptidase 1(THOP1)                              | NM_003249    | 121.3 | 144.9 | 0.0140 | 1.34 |
|            |                                                             | XM_942288    | 119.2 | 139   | 0.0140 | 1.31 |
|            |                                                             | BQ188349     | 98.3  | 103.9 | 0.0140 | 1.14 |
| OPN5       | opsin 5(OPN5)                                               | NM_001030051 | 174.7 | 120.6 | 0.0140 | 0.77 |
| TLR9       | toll like receptor 9(TLR9)                                  | NM_017442    | 88.6  | 98.7  | 0.0140 | 1.19 |

|         |                                                                               |           |       |       |        |      |
|---------|-------------------------------------------------------------------------------|-----------|-------|-------|--------|------|
| REXO4   | REX4 homolog, 3'-5' exonuclease(REXO4)                                        | NM_020385 | 190.5 | 216.7 | 0.0140 | 1.31 |
| TXNDC11 | thioredoxin domain containing 11(TXNDC11)                                     | NM_015914 | 101.5 | 112.8 | 0.0140 | 1.22 |
| NGFR    | nerve growth factor receptor(NGFR)                                            | NM_002507 | 94.8  | 100.5 | 0.0140 | 1.13 |
| TAF1C   | TATA-box binding protein associated factor, RNA polymerase I subunit C(TAF1C) | NM_139353 | 143.4 | 156   | 0.0140 | 1.24 |
|         |                                                                               | XR_015650 | 118.6 | 129.5 | 0.0140 | 1.23 |
| MCOLN1  | mucolipin 1(MCOLN1)                                                           | NM_020533 | 103.6 | 141.9 | 0.0140 | 1.54 |
| KHDRBS3 | KH RNA binding domain containing, signal transduction associated 3(KHDRBS3)   | NM_006558 | 123.7 | 131.3 | 0.0140 | 1.5  |



|               |                                                                                            |                  |       |       |        |      |
|---------------|--------------------------------------------------------------------------------------------|------------------|-------|-------|--------|------|
| KHDRB<br>S3   | KH RNA binding<br>domain<br>containing, signal<br>transduction<br>associated<br>3(KHDRBS3) | NM_00655<br>8    | 208.7 | 278   | 0.0140 | 1.5  |
|               |                                                                                            | AW044615         | 120.4 | 98.3  | 0.0140 | 0.88 |
| HUS1          | HUS1 checkpoint<br>clamp<br>component(HUS1<br>)                                            | NM_00450<br>7    | 120.9 | 97.1  | 0.0140 | 0.85 |
| PSMD6-<br>AS2 | PSMD6 antisense<br>RNA 2(PSMD6-<br>AS2)                                                    | AK023371         | 107.5 | 109.9 | 0.0140 | 1.11 |
| MRPL39        | mitochondrial<br>ribosomal protein<br>L39(MRPL39)                                          | NM_08079<br>4    | 106.8 | 121.7 | 0.0140 | 1.29 |
| KRTAP1<br>2-4 | keratin associated<br>protein 12-<br>4(KRTAP12-4)                                          | NM_19869<br>8    | 122.6 | 97    | 0.0140 | 0.85 |
| RBM26         | RNA binding motif<br>protein<br>26(RBM26)                                                  | NM_02211<br>8    | 144.5 | 170.5 | 0.0140 | 1.34 |
| ATAD2B        | ATPase family,<br>AAA domain<br>containing<br>2B(ATAD2B)                                   | NM_01755<br>2    | 110.4 | 114.3 | 0.0140 | 1.16 |
| EXOSC<br>10   | exosome<br>component<br>10(EXOSC10)                                                        | NM_00100<br>1998 | 117.1 | 124.9 | 0.0140 | 1.2  |

|         |                                                        |              |        |        |        |      |           |       |      |
|---------|--------------------------------------------------------|--------------|--------|--------|--------|------|-----------|-------|------|
| EXOSC10 | exosome component 10(EXOSC10)                          | NM_001001998 | 418.7  | 407.8  | 0.0140 | 1.2  | NM_013059 | 21.02 | 0.11 |
| SBDSP1  | Shwachman-Bodian-Diamond syndrome pseudogene 1(SBDSP1) | NR_001588    | 279.4  | 179.6  | 0.0150 | 0.72 |           |       |      |
| SBDSP1  | Shwachman-Bodian-Diamond syndrome pseudogene 1(SBDSP1) | NR_001588    | 299    | 214    | 0.0150 | 0.72 |           |       |      |
|         |                                                        | BQ185080     | 121.5  | 98.8   | 0.0150 | 0.87 |           |       |      |
| SEH1L   | SEH1 like nucleoporin(SEH1L)                           | NM_001013437 | 137.3  | 156.3  | 0.0150 | 1.29 |           |       |      |
| SEH1L   | SEH1 like nucleoporin(SEH1L)                           | NM_001013437 | 221.8  | 217.1  | 0.0150 | 1.29 |           |       |      |
| WDR35   | WD repeat domain 35(WDR35)                             | NM_001006657 | 257.6  | 166    | 0.0150 | 0.73 |           |       |      |
| CCNI    | cyclin I(CCNI)                                         | NM_006835    | 3100.4 | 3698.5 | 0.0150 | 1.27 |           |       |      |
|         |                                                        | XM_927542    | 155.8  | 116.5  | 0.0150 | 0.83 |           |       |      |
|         |                                                        | XM_001721042 | 100.4  | 92.1   | 0.0150 | 0.85 |           |       |      |
|         |                                                        | XM_001721042 | 181.6  | 135.5  | 0.0150 | 0.85 |           |       |      |

|         |                                              |              |       |       |        |      |           |       |      |
|---------|----------------------------------------------|--------------|-------|-------|--------|------|-----------|-------|------|
|         |                                              | XM_001725241 | 99.2  | 102.1 | 0.0150 | 1.12 |           |       |      |
| MAGEL2  | MAGE family member L2(MAGEL2)                | NM_019066    | 176.2 | 124.1 | 0.0150 | 0.79 | NM_012816 | 19.78 | 2.28 |
|         |                                              | XR_001434    | 123.5 | 102.6 | 0.0150 | 0.89 | NM_012816 | 19.78 | 2.28 |
| DNAH6   | dynein axonemal heavy chain 6(DNAH6)         | NM_173645    | 166   | 185.3 | 0.0150 | 1.27 |           |       |      |
| RAD51C  | RAD51 paralog C(RAD51C)                      | NM_002876    | 103.2 | 122.6 | 0.0150 | 1.32 |           |       |      |
| CSNK1A1 | casein kinase 1 alpha 1(CSNK1A1)             | NM_001892    | 195.1 | 256   | 0.0150 | 1.5  |           |       |      |
| SF3B1   | splicing factor 3b subunit 1(SF3B1)          | NM_001005526 | 96.4  | 105.3 | 0.0150 | 1.18 |           |       |      |
| CSTF3   | cleavage stimulation factor subunit 3(CSTF3) | NM_001033506 | 112.2 | 124.4 | 0.0150 | 1.25 |           |       |      |
| PLA2G6  | phospholipase A2 group VI(PLA2G6)            | NM_001004426 | 182.4 | 129   | 0.0150 | 0.8  |           |       |      |
| ZNF462  | zinc finger protein 462(ZNF462)              | NM_021224    | 130.2 | 175.5 | 0.0150 | 1.5  |           |       |      |
| ZCCHC6  | zinc finger CCHC-type containing 6(ZCCHC6)   | NM_024617    | 142.7 | 332.1 | 0.0150 | 2.69 |           |       |      |
|         |                                              | XM_936462    | 100.1 | 104.5 | 0.0150 | 1.13 |           |       |      |

|           |                                            |              |         |         |        |      |           |      |       |
|-----------|--------------------------------------------|--------------|---------|---------|--------|------|-----------|------|-------|
| CLCN6     | chloride voltage-gated channel 6(CLCN6)    | NM_001286    | 152.7   | 151.3   | 0.0150 | 1.13 |           |      |       |
| ANKRD12   | ankyrin repeat domain 12(ANKRD12)          | NM_015208    | 122.6   | 140.8   | 0.0150 | 1.3  |           |      |       |
| RORA      | RAR related orphan receptor A(RORA)        | AK055969     | 117.3   | 134.3   | 0.0150 | 1.27 |           |      |       |
| PBXIP1    | PBX homeobox interacting protein 1(PBXIP1) | NM_020524    | 161.6   | 122.6   | 0.0150 | 0.85 |           |      |       |
| nfic      | nuclear factor I C(NFIC)                   | NM_005597    | 114.1   | 105.2   | 0.0150 | 0.83 |           |      |       |
| nfic      | nuclear factor I C(NFIC)                   | NM_005597    | 115.2   | 89.5    | 0.0150 | 0.83 |           |      |       |
| DPT       | dermatopontin(DPT)                         | NM_001937    | 670.8   | 373.6   | 0.0150 | 0.64 |           |      |       |
| LOC642947 | uncharacterized LOC642947(LOC642947)       | NM_001039895 | 11130.4 | 12980.5 | 0.0150 | 1.28 |           |      |       |
| FRA10A C1 | FRA10A associated CGG repeat 1(FRA10AC1)   | NM_203440    | 100.4   | 106     | 0.0150 | 1.14 |           |      |       |
| NXN       | nucleoredoxin(NXN)                         | NM_022463    | 136.1   | 105.1   | 0.0150 | 0.84 | NM_031544 | 4.79 | 38.59 |

|          |                                                                    |              |       |       |        |      |           |      |       |
|----------|--------------------------------------------------------------------|--------------|-------|-------|--------|------|-----------|------|-------|
| SREK1    | splicing regulatory glutamic acid and lysine rich protein 1(SREK1) | NM_139168    | 95.7  | 102.7 | 0.0150 | 1.17 | NM_031544 | 4.79 | 38.59 |
|          |                                                                    | XM_001720144 | 97.4  | 102.9 | 0.0150 | 1.14 |           |      |       |
| KTI12    | KTI12 chromatin associated homolog(KTI12)                          | NM_138417    | 138.8 | 107.1 | 0.0150 | 0.83 |           |      |       |
|          |                                                                    | XM_944214    | 113.1 | 93.7  | 0.0150 | 0.89 |           |      |       |
| WDR19    | WD repeat domain 19(WDR19)                                         | NM_025132    | 146.6 | 167.2 | 0.0150 | 1.28 |           |      |       |
| PAPOLA   | poly(A) polymerase alpha(PAPOLA)                                   | NM_032632    | 661.5 | 930.2 | 0.0160 | 1.54 |           |      |       |
| RAB2B    | RAB2B, member RAS oncogene family(RAB2B)                           | NM_032846    | 292.2 | 348.1 | 0.0160 | 1.33 |           |      |       |
| ITGA4    | integrin subunit alpha 4(ITGA4)                                    | NM_000885    | 89.1  | 98.8  | 0.0160 | 1.2  |           |      |       |
|          |                                                                    | XM_928404    | 176.5 | 130.9 | 0.0160 | 0.84 |           |      |       |
| FLJ41327 | FLJ41327 protein(FLJ41327)                                         | NM_207485    | 98.4  | 101.4 | 0.0160 | 1.12 |           |      |       |
| ANKRD16  | ankyrin repeat domain 16(ANKRD16)                                  | NM_001009941 | 113.3 | 118.9 | 0.0160 | 1.2  |           |      |       |

|         |                                                               |              |       |       |        |      |
|---------|---------------------------------------------------------------|--------------|-------|-------|--------|------|
| U2SURP  | U2 snRNP associated SURP domain containing(U2SURP)            | NM_001080415 | 243.1 | 272.7 | 0.0160 | 1.28 |
| PFKFB2  | 6-phosphofructo-2-kinase/fructose-2,6-biphosphatase 2(PFKFB2) | NM_001018053 | 124.3 | 100.1 | 0.0160 | 0.87 |
| PFKFB2  | 6-phosphofructo-2-kinase/fructose-2,6-biphosphatase 2(PFKFB2) | NM_001018053 | 126.5 | 114.8 | 0.0160 | 0.87 |
|         |                                                               | XM_942545    | 96.5  | 103.1 | 0.0160 | 1.18 |
| DZIP1   | DAZ interacting zinc finger protein 1(DZIP1)                  | NM_198968    | 124.2 | 171.1 | 0.0160 | 1.54 |
| TLE3    | transducin like enhancer of split 3(TLE3)                     | NM_005078    | 96.4  | 104.6 | 0.0160 | 1.18 |
| CYP2A13 | cytochrome P450 family 2 subfamily A member 13(CYP2A13)       | NM_000766    | 89    | 99.6  | 0.0160 | 1.2  |
| CYP2A13 | cytochrome P450 family 2 subfamily A member 13(CYP2A13)       | NM_000766    | 111.3 | 100.3 | 0.0160 | 1.2  |

|         |                                                            |              |       |       |        |      |
|---------|------------------------------------------------------------|--------------|-------|-------|--------|------|
| GRIN2A  | glutamate ionotropic receptor NMDA type subunit 2A(GRIN2A) | NM_000833    | 111.9 | 93.5  | 0.0160 | 0.88 |
| SETX    | senataxin(SETX)                                            | NM_015046    | 104.1 | 123.3 | 0.0160 | 1.28 |
|         |                                                            | AW975165     | 101.1 | 107.5 | 0.0160 | 1.14 |
|         |                                                            | XM_001134195 | 121.6 | 99.8  | 0.0160 | 0.89 |
|         |                                                            | XM_927996    | 114.5 | 95    | 0.0160 | 0.88 |
| CAPRIN2 | caprin family member 2(CAPRIN2)                            | NM_001002259 | 235.2 | 252.4 | 0.0160 | 1.23 |
|         |                                                            | XM_001725231 | 115.2 | 92.7  | 0.0160 | 0.85 |
| EPS8L3  | EPS8 like 3(EPS8L3)                                        | NM_024526    | 112   | 94.3  | 0.0160 | 0.9  |
| LRRC15  | leucine rich repeat containing 15(LRRC15)                  | NM_130830    | 105.1 | 110.5 | 0.0160 | 1.16 |
|         |                                                            | XM_001721880 | 107.4 | 101.2 | 0.0160 | 1.15 |
|         |                                                            | XM_001721880 | 175.1 | 177.7 | 0.0160 | 1.15 |
| SCAF4   | SR-related CTD associated factor 4(SCAF4)                  | NM_020706    | 183.1 | 219.9 | 0.0160 | 1.34 |
|         |                                                            | XM_001715244 | 115.4 | 99    | 0.0160 | 0.91 |

|             |                                                               |                  |        |        |        |      |
|-------------|---------------------------------------------------------------|------------------|--------|--------|--------|------|
| UBE2Q2      | ubiquitin<br>conjugating<br>enzyme E2<br>Q2(UBE2Q2)           | NM_17346<br>9    | 105.9  | 114.7  | 0.0160 | 1.19 |
|             |                                                               | XM_94204<br>9    | 126.3  | 98.4   | 0.0160 | 0.85 |
| NCOR1<br>P1 | nuclear receptor<br>corepressor 1<br>pseudogene<br>1(NCOR1P1) | NM_00103<br>9379 | 222.7  | 270.1  | 0.0160 | 1.35 |
| BCL2        | BCL2, apoptosis<br>regulator(BCL2)                            | NM_00063<br>3    | 106.3  | 116.7  | 0.0170 | 1.23 |
| BCL2        | BCL2, apoptosis<br>regulator(BCL2)                            | NM_00063<br>3    | 280.2  | 304.5  | 0.0170 | 1.23 |
| GNB3        | G protein subunit<br>beta 3(GNB3)                             | NM_00207<br>5    | 142.1  | 105.4  | 0.0170 | 0.82 |
| ALKBH5      | alkB homolog 5,<br>RNA<br>demethylase(ALK<br>BH5)             | NM_01775<br>8    | 2465.6 | 1848.7 | 0.0170 | 0.83 |
| CTGF        | connective tissue<br>growth<br>factor(CTGF)                   | NM_00190<br>1    | 128    | 92.9   | 0.0170 | 0.79 |
| TSSK1B      | testis specific<br>serine kinase<br>1B(TSSK1B)                | NM_03202<br>8    | 102    | 107.2  | 0.0170 | 1.15 |
|             |                                                               | BM671800         | 141.5  | 110.5  | 0.0170 | 0.85 |
| HIC2        | HIC ZBTB<br>transcriptional<br>repressor 2(HIC2)              | NM_01509<br>4    | 145.2  | 158.9  | 0.0170 | 1.24 |



|          |                                                      |              |       |       |        |      |
|----------|------------------------------------------------------|--------------|-------|-------|--------|------|
| TNRC6A   | trinucleotide repeat containing 6A(TNRC6A)           | NM_014494    | 124.2 | 128.5 | 0.0170 | 1.15 |
| TNRC6A   | trinucleotide repeat containing 6A(TNRC6A)           | NM_014494    | 138.8 | 134.2 | 0.0170 | 1.15 |
| TNRC6A   | trinucleotide repeat containing 6A(TNRC6A)           | NM_014494    | 366.9 | 310.9 | 0.0170 | 1.15 |
| CALCOCO1 | calcium binding and coiled-coil domain 1(CALCOCO1)   | NM_020898    | 209.2 | 148.7 | 0.0170 | 0.81 |
| EXOSC9   | exosome component 9(EXOSC9)                          | NM_001034194 | 170   | 169   | 0.0170 | 1.35 |
| EXOSC9   | exosome component 9(EXOSC9)                          | NM_001034194 | 170.9 | 205.6 | 0.0170 | 1.35 |
| PTGIR    | prostaglandin I2 (prostacyclin) receptor (IP)(PTGIR) | NM_000960    | 131.9 | 101.3 | 0.0170 | 0.84 |
|          |                                                      | XM_942713    | 95.4  | 101.9 | 0.0170 | 1.17 |
| SNORA12  | small nucleolar RNA, H/ACA box 12(SNORA12)           | NR_002954    | 99.6  | 110.3 | 0.0170 | 1.19 |
| TBC1D8   | TBC1 domain family member 8(TBC1D8)                  | NM_007063    | 129.2 | 139.8 | 0.0170 | 1.23 |

|       |                                                                                          |                  |       |       |        |      |
|-------|------------------------------------------------------------------------------------------|------------------|-------|-------|--------|------|
| NCOA5 | nuclear receptor<br>coactivator<br>5(NCOA5)                                              | NM_02096<br>7    | 117.3 | 122.9 | 0.0170 | 1.17 |
| MCM9  | minichromosome<br>maintenance 9<br>homologous<br>recombination<br>repair<br>factor(MCM9) | NM_15325<br>5    | 108.4 | 127.1 | 0.0170 | 1.27 |
| NDC1  | NDC1<br>transmembrane<br>nucleoporin(NDC<br>1)                                           | NM_01808<br>7    | 96    | 105.5 | 0.0170 | 1.2  |
| CDK7  | cyclin dependent<br>kinase 7(CDK7)                                                       | NM_00179<br>9    | 180.2 | 223.1 | 0.0170 | 1.4  |
| FA2H  | fatty acid 2-<br>hydroxylase(FA2<br>H)                                                   | NM_02430<br>6    | 180   | 119.9 | 0.0170 | 0.75 |
| MXRA7 | matrix remodeling<br>associated<br>7(MXRA7)                                              | NM_00100<br>8528 | 106.5 | 111.3 | 0.0170 | 1.17 |
| VPS39 | VPS39, HOPS<br>complex<br>subunit(VPS39)                                                 | NM_01528<br>9    | 111.5 | 112.4 | 0.0170 | 1.12 |
| WNK1  | WNK lysine<br>deficient protein<br>kinase 1(WNK1)                                        | NM_01897<br>9    | 154.4 | 142   | 0.0170 | 1.73 |
| WNK1  | WNK lysine<br>deficient protein<br>kinase 1(WNK1)                                        | NM_01897<br>9    | 196.9 | 293.3 | 0.0170 | 1.73 |

|         |                                                    |              |         |         |        |      |
|---------|----------------------------------------------------|--------------|---------|---------|--------|------|
| EXOSC3  | exosome component 3(EXOSC3)                        | NM_016042    | 141.8   | 168.3   | 0.0170 | 1.34 |
| CNRIP1  | cannabinoid receptor interacting protein 1(CNRIP1) | NM_001111101 | 96.3    | 102.1   | 0.0170 | 1.15 |
| SGSH    | N-sulfoglucosamine sulfohydrolase(SGSH)            | NM_000199    | 364.2   | 245.8   | 0.0170 | 0.78 |
| HAX1    | HCLS1 associated protein X-1(HAX1)                 | NM_006118    | 120.3   | 122.7   | 0.0180 | 1.16 |
| HAX1    | HCLS1 associated protein X-1(HAX1)                 | NM_006118    | 310.8   | 288.5   | 0.0180 | 1.16 |
| CD200R1 | CD200 receptor 1(CD200R1)                          | NM_138806    | 95.7    | 102.4   | 0.0180 | 1.16 |
| COQ10A  | coenzyme Q10A(COQ10A)                              | NM_144576    | 331     | 176.8   | 0.0180 | 0.6  |
| ZMYM5   | zinc finger MYM-type containing 5(ZMYM5)           | NM_001039650 | 113.5   | 118.2   | 0.0180 | 1.17 |
| MBP     | myelin basic protein(MBP)                          | NM_001025090 | 189.1   | 252.9   | 0.0180 | 1.48 |
| NAG18   | NAG18 mRNA(NAG18)                                  | NR_002568    | 19695.2 | 16538.4 | 0.0180 | 0.81 |

|               |                                                                     |                  |       |       |        |      |
|---------------|---------------------------------------------------------------------|------------------|-------|-------|--------|------|
| RFC4          | replication factor<br>C subunit<br>4(RFC4)                          | NM_18157<br>3    | 95.2  | 113.1 | 0.0180 | 1.31 |
| FAM160<br>B2  | family with<br>sequence<br>similarity 160<br>member<br>B2(FAM160B2) | NM_02274<br>9    | 114.1 | 107.6 | 0.0180 | 1.15 |
| FAM160<br>B2  | family with<br>sequence<br>similarity 160<br>member<br>B2(FAM160B2) | NM_02274<br>9    | 124.6 | 128.4 | 0.0180 | 1.15 |
| FAM131<br>A   | family with<br>sequence<br>similarity 131<br>member<br>A(FAM131A)   | NM_14463<br>5    | 220.5 | 155.3 | 0.0180 | 0.78 |
| MRPL42        | mitochondrial<br>ribosomal protein<br>L42(MRPL42)                   | NM_17217<br>7    | 100.1 | 107   | 0.0180 | 1.16 |
| SLC45A<br>4   | solute carrier<br>family 45 member<br>4(SLC45A4)                    | NM_00108<br>0431 | 104.9 | 86.9  | 0.0180 | 0.85 |
| CES3          | carboxylesterase<br>3(CES3)                                         | NM_02492<br>2    | 120.8 | 98.3  | 0.0180 | 0.86 |
| LINC00<br>854 | long intergenic<br>non-protein<br>coding RNA<br>854(LINC00854)      | BC073918         | 122.7 | 97.5  | 0.0180 | 0.85 |

|         |                                                                |              |        |        |        |      |
|---------|----------------------------------------------------------------|--------------|--------|--------|--------|------|
| GPX5    | glutathione peroxidase 5(GPX5)                                 | NM_001509    | 124.2  | 91.8   | 0.0180 | 0.76 |
| GPX5    | glutathione peroxidase 5(GPX5)                                 | NM_001509    | 135.3  | 95     | 0.0180 | 0.76 |
| MCMDC2  | minichromosome maintenance domain containing 2(MCMDC2)         | NM_173518    | 109.1  | 103.5  | 0.0180 | 1.28 |
| MCMDC2  | minichromosome maintenance domain containing 2(MCMDC2)         | NM_173518    | 3616.2 | 4452.2 | 0.0180 | 1.28 |
| SELENOK | selenoprotein K(SELENOK)                                       | NM_021237    | 119.7  | 97.3   | 0.0180 | 0.88 |
|         |                                                                | NM_006674    | 130.6  | 133.4  | 0.0180 | 1.17 |
| KCTD12  | potassium channel tetramerization domain containing 12(KCTD12) | NM_138444    | 191.9  | 360.6  | 0.0180 | 2.1  |
|         |                                                                | XR_038277    | 110.6  | 113.4  | 0.0180 | 1.14 |
|         |                                                                | XM_001723218 | 110.5  | 92.1   | 0.0180 | 0.88 |

|         |                                                                |              |        |        |        |      |           |       |      |
|---------|----------------------------------------------------------------|--------------|--------|--------|--------|------|-----------|-------|------|
| NAA15   | N(alpha)-acetyltransferase 15, NatA auxiliary subunit(NAA15)   | NM_057175    | 102.9  | 104.5  | 0.0180 | 1.1  |           |       |      |
|         |                                                                | XR_015544    | 218.2  | 151.3  | 0.0180 | 0.79 |           |       |      |
|         |                                                                | XM_001722663 | 148.1  | 113.9  | 0.0180 | 0.86 |           |       |      |
| RND3    | Rho family GTPase 3(RND3)                                      | NM_005168    | 107.3  | 121.3  | 0.0180 | 1.27 |           |       |      |
| AGPAT3  | 1-acylglycerol-3-phosphate O-acyltransferase 3(AGPAT3)         | NM_020132    | 153.7  | 118.1  | 0.0180 | 0.86 |           |       |      |
| SNORD33 | small nucleolar RNA, C/D box 33(SNORD33)                       | NR_000020    | 113.1  | 123    | 0.0180 | 1.18 |           |       |      |
| ANKRD26 | ankyrin repeat domain 26(ANKRD26)                              | NM_014915    | 131.5  | 146.1  | 0.0180 | 1.22 |           |       |      |
| KCTD17  | potassium channel tetramerization domain containing 17(KCTD17) | NM_024681    | 103.4  | 112    | 0.0180 | 1.19 | NM_031012 | 19.39 | 0.85 |
| PPT1    | palmitoyl-protein thioesterase 1(PPT1)                         | NM_000310    | 1353.3 | 1657.5 | 0.0180 | 1.32 |           |       |      |

|         |                                                                                                      |               |        |        |        |      |               |       |       |
|---------|------------------------------------------------------------------------------------------------------|---------------|--------|--------|--------|------|---------------|-------|-------|
| RPLP2   | ribosomal protein<br>lateral stalk<br>subunit<br>P2(RPLP2)                                           | NM_00100<br>4 | 7146.7 | 9850.2 | 0.0190 | 1.43 |               |       |       |
|         |                                                                                                      | XM_93455<br>3 | 112.5  | 93.5   | 0.0190 | 0.9  | NM_0129<br>04 | 10.16 | 55.22 |
|         |                                                                                                      | XM_93775<br>3 | 156.6  | 119.7  | 0.0190 | 0.85 |               |       |       |
| FUT4    | fucosyltransferase<br>4(FUT4)                                                                        | NM_00203<br>3 | 89     | 97.5   | 0.0190 | 1.18 |               |       |       |
| Snora21 | small nucleolar<br>RNA, H/ACA box<br>21(SNORA21)                                                     | NR_00257<br>6 | 106.7  | 117.3  | 0.0190 | 1.23 |               |       |       |
| MOCS1   | molybdenum<br>cofactor synthesis<br>1(MOCS1)                                                         | NM_00594<br>3 | 221.3  | 150.3  | 0.0190 | 0.76 |               |       |       |
| TOP1P2  | topoisomerase<br>(DNA) I<br>pseudogene<br>2(TOP1P2)                                                  | NR_00128<br>3 | 153.7  | 184.9  | 0.0190 | 1.36 |               |       |       |
| YWHAB   | tyrosine 3-<br>monooxygenase/t<br>ryptophan 5-<br>monooxygenase<br>activation protein<br>beta(YWHAB) | NM_13932<br>3 | 1349.8 | 1627.9 | 0.0190 | 1.31 |               |       |       |
| EIF4G3  | eukaryotic<br>translation<br>initiation factor 4<br>gamma 3(EIF4G3)                                  | NM_00376<br>0 | 200.8  | 256.1  | 0.0190 | 1.45 |               |       |       |

|         |                                                                    |              |       |       |        |      |           |       |      |
|---------|--------------------------------------------------------------------|--------------|-------|-------|--------|------|-----------|-------|------|
| CEACAM4 | carcinoembryonic antigen related cell adhesion molecule 4(CEACAM4) | NM_001817    | 155.2 | 117.1 | 0.0190 | 0.84 |           |       |      |
|         |                                                                    | XM_001133189 | 106.8 | 88.6  | 0.0190 | 0.87 |           |       |      |
|         |                                                                    | XM_001133189 | 234   | 189.4 | 0.0190 | 0.87 |           |       |      |
| KLHL23  | kelch like family member 23(KLHL23)                                | NM_144711    | 94.7  | 103.4 | 0.0190 | 1.18 | NM_012823 | 17.52 | 0.04 |
| AOC2    | amine oxidase, copper containing 2(AOC2)                           | NM_001158    | 200.7 | 128.4 | 0.0190 | 0.73 |           |       |      |
| TSPEAR  | thrombospondin type laminin G domain and EAR repeats(TSPEAR)       | NM_144991    | 122.2 | 100.2 | 0.0190 | 0.88 |           |       |      |
| ADNP    | activity dependent neuroprotector homeobox(ADNP)                   | NM_015339    | 115.9 | 124.2 | 0.0190 | 1.19 |           |       |      |
|         |                                                                    | XM_929248    | 156.7 | 116.6 | 0.0190 | 0.83 |           |       |      |
| URI1    | URI1, prefoldin like chaperone(URI1)                               | NM_134447    | 154.4 | 158.4 | 0.0190 | 1.45 |           |       |      |



|        |                                                       |              |       |       |        |      |
|--------|-------------------------------------------------------|--------------|-------|-------|--------|------|
| URI1   | URI1, prefoldin like chaperone(URI1)                  | NM_134447    | 476.1 | 600.9 | 0.0190 | 1.45 |
| DAZAP1 | DAZ associated protein 1(DAZAP1)                      | NM_170711    | 154.8 | 168.1 | 0.0190 | 1.26 |
| ZNF740 | zinc finger protein 740(ZNF740)                       | NM_001004304 | 165.4 | 126   | 0.0190 | 0.86 |
| CEP131 | centrosomal protein 131(CEP131)                       | NM_014984    | 100.2 | 112.7 | 0.0190 | 1.25 |
| TMEM9  | transmembrane protein 9(TMEM9)                        | NM_016456    | 229.1 | 151.5 | 0.0190 | 0.74 |
| ATXN10 | ataxin 10(ATXN10)                                     | NM_013236    | 174.8 | 128.1 | 0.0190 | 0.83 |
|        |                                                       | XR_016385    | 204.3 | 102.5 | 0.0200 | 0.56 |
| MRPL34 | mitochondrial ribosomal protein L34(MRPL34)           | NM_023937    | 324.5 | 240.3 | 0.0200 | 0.84 |
| ZNF22  | zinc finger protein 22(ZNF22)                         | NM_006963    | 246.9 | 364.2 | 0.0200 | 1.63 |
| ZNF22  | zinc finger protein 22(ZNF22)                         | NM_006963    | 353   | 311.8 | 0.0200 | 1.63 |
| NSUN5  | NOP2/Sun RNA methyltransferase family member 5(NSUN5) | NM_018044    | 92.7  | 99.7  | 0.0200 | 1.14 |

|           |                                                       |           |       |       |        |      |
|-----------|-------------------------------------------------------|-----------|-------|-------|--------|------|
| NSUN5     | NOP2/Sun RNA methyltransferase family member 5(NSUN5) | NM_018044 | 136.7 | 130.9 | 0.0200 | 1.14 |
| SLC17A5   | solute carrier family 17 member 5(SLC17A5)            | NM_012434 | 100.7 | 103.8 | 0.0200 | 1.12 |
| USP16     | ubiquitin specific peptidase 16(USP16)                | NM_006447 | 292.9 | 275.6 | 0.0200 | 1.29 |
| USP16     | ubiquitin specific peptidase 16(USP16)                | NM_006447 | 337.4 | 394.9 | 0.0200 | 1.29 |
|           |                                                       | XM_929287 | 89.9  | 99.1  | 0.0200 | 1.16 |
| DUSP18    | dual specificity phosphatase 18(DUSP18)               | NM_152511 | 103.2 | 111   | 0.0200 | 1.18 |
| ZNF302    | zinc finger protein 302(ZNF302)                       | NM_018443 | 136.8 | 155.1 | 0.0200 | 1.3  |
| KRTAP10-1 | keratin associated protein 10-1(KRTAP10-1)            | NM_198691 | 106.4 | 87.3  | 0.0200 | 0.87 |
| FAT1      | FAT atypical cadherin 1(FAT1)                         | NM_005245 | 259.4 | 183.4 | 0.0200 | 0.64 |
| FAT1      | FAT atypical cadherin 1(FAT1)                         | NM_005245 | 291.5 | 168.2 | 0.0200 | 0.64 |
| TMOD3     | tropomodulin 3(TMOD3)                                 | NM_014547 | 89.4  | 99    | 0.0200 | 1.18 |

|               |                                                  |                  |       |       |        |      |
|---------------|--------------------------------------------------|------------------|-------|-------|--------|------|
| TMOD3         | tropomodulin<br>3(TMOD3)                         | NM_01454<br>7    | 161.7 | 183.8 | 0.0200 | 1.18 |
| SERPIN<br>A11 | serpin family A<br>member<br>11(SERPINA11)       | NM_00108<br>0451 | 123.9 | 97.9  | 0.0200 | 0.85 |
| DLD           | dihydrolipoamide<br>dehydrogenase(D<br>LD)       | NM_00010<br>8    | 554.4 | 309.5 | 0.0200 | 0.62 |
|               |                                                  | XR_03898<br>3    | 121.7 | 97.3  | 0.0200 | 0.86 |
| ZNF426        | zinc finger protein<br>426(ZNF426)               | NM_02410<br>6    | 103.6 | 111.5 | 0.0200 | 1.17 |
| USF1          | upstream<br>transcription factor<br>1(USF1)      | NM_00712<br>2    | 114.7 | 163.8 | 0.0200 | 1.6  |
| NALCN         | sodium leak<br>channel, non-<br>selective(NALCN) | NM_05286<br>7    | 102.1 | 102.5 | 0.0200 | 1.1  |
| FZD1          | frizzled class<br>receptor 1(FZD1)               | NM_00350<br>5    | 117.6 | 119.8 | 0.0200 | 1.11 |
| FZD1          | frizzled class<br>receptor 1(FZD1)               | NM_00350<br>5    | 251.1 | 149.7 | 0.0200 | 1.11 |
| SELEN<br>OH   | selenoprotein<br>H(SELENOH)                      | NM_17074<br>6    | 101.1 | 109.7 | 0.0200 | 1.19 |
| ACKR3         | atypical<br>chemokine<br>receptor<br>3(ACKR3)    | NM_02031<br>1    | 289.6 | 535.3 | 0.0200 | 2.12 |

|          |                                                |              |       |        |        |      |
|----------|------------------------------------------------|--------------|-------|--------|--------|------|
| DHX15    | DEAH-box helicase 15(DHX15)                    | NM_001358    | 230   | 241.5  | 0.0200 | 1.56 |
| DHX15    | DEAH-box helicase 15(DHX15)                    | NM_001358    | 752.7 | 1044.7 | 0.0200 | 1.56 |
|          |                                                | XM_940223    | 135   | 90.8   | 0.0200 | 0.75 |
| BAIAP2L2 | BAI1 associated protein 2 like 2(BAIAP2L2)     | NM_025045    | 306.1 | 152.5  | 0.0200 | 0.56 |
| CERS4    | ceramide synthase 4(CERS4)                     | NM_024552    | 124.5 | 100.5  | 0.0200 | 0.85 |
| CASKIN2  | CASK interacting protein 2(CASKIN2)            | NM_020753    | 105.8 | 107.8  | 0.0210 | 1.12 |
| Snord96a | small nucleolar RNA, C/D box 96A(SNORD96A)     | NR_002592    | 99.3  | 114.7  | 0.0210 | 1.27 |
| CHMP2A   | charged multivesicular body protein 2A(CHMP2A) | NM_198426    | 182.8 | 124.1  | 0.0210 | 0.76 |
|          |                                                | AV652851     | 115.8 | 150.5  | 0.0210 | 1.42 |
|          |                                                | XM_001715037 | 124   | 142.4  | 0.0210 | 1.29 |

|          |                                                               |              |       |       |        |      |           |            |
|----------|---------------------------------------------------------------|--------------|-------|-------|--------|------|-----------|------------|
| MMAB     | methylmalonic aciduria (cobalamin deficiency) cbIB type(MMAB) | NM_052845    | 152.9 | 117.8 | 0.0210 | 0.86 |           |            |
| MMAB     | methylmalonic aciduria (cobalamin deficiency) cbIB type(MMAB) | NM_052845    | 221.6 | 166   | 0.0210 | 0.86 |           |            |
| FBRS     | fibrosin(FBRS)                                                | NM_001105079 | 188.8 | 217.5 | 0.0210 | 1.33 |           |            |
| PTGER4   | prostaglandin E receptor 4(PTGER4)                            | NM_000958    | 442.3 | 547.7 | 0.0210 | 1.41 | NM_017170 | 13.37 0.05 |
| HMGB1 P1 | high mobility group box 1 pseudogene 1(HMGB1P1)               | NM_001008735 | 215.7 | 378.6 | 0.0210 | 2.01 |           |            |
| HMGB1 P1 | high mobility group box 1 pseudogene 1(HMGB1P1)               | NM_001008735 | 264.9 | 352.8 | 0.0210 | 2.01 |           |            |
| MRPS35   | mitochondrial ribosomal protein S35(MRPS35)                   | NM_021821    | 214.1 | 143.6 | 0.0210 | 0.74 |           |            |
| RNVU1-18 | RNA, variant U1 small nuclear 18(RNVU1-18)                    | NR_0044400   | 170   | 208.3 | 0.0210 | 1.38 |           |            |

|         |                                                             |              |         |       |        |      |              |      |       |
|---------|-------------------------------------------------------------|--------------|---------|-------|--------|------|--------------|------|-------|
| ING3    | inhibitor of growth family member 3(ING3)                   | NM_198267    | 108.3   | 122.6 | 0.0210 | 1.24 |              |      |       |
| RNU1-3  | RNA, U1 small nuclear 3(RNU1-3)                             | NR_004408    | 157.3   | 196.5 | 0.0210 | 1.4  |              |      |       |
| C9ORF24 | chromosome 9 open reading frame 24(C9orf24)                 | NM_147169    | 131.7   | 105.7 | 0.0210 | 0.87 |              |      |       |
| KCNH6   | potassium voltage-gated channel subfamily H member 6(KCNH6) | NM_030779    | 12897.2 | 14787 | 0.0210 | 1.29 | NM_001106492 | 2.61 | 10.85 |
|         |                                                             | XM_942932    | 125.1   | 98.5  | 0.0210 | 0.85 | NM_001106492 | 2.61 | 10.85 |
|         |                                                             | XM_927702    | 112.2   | 93    | 0.0210 | 0.88 |              |      |       |
|         |                                                             | NM_001013840 | 122.3   | 123.3 | 0.0210 | 1.14 |              |      |       |
|         |                                                             | NM_001013840 | 130.5   | 108.1 | 0.0210 | 1.14 |              |      |       |
| FLII    | FLII, actin remodeling protein(FLII)                        | NM_002018    | 165.1   | 179.2 | 0.0210 | 1.24 |              |      |       |
| SYNJ1   | synaptojanin 1(SYNJ1)                                       | NM_203446    | 199.5   | 234.2 | 0.0210 | 1.33 |              |      |       |

|             |                                                                       |                  |        |        |        |      |
|-------------|-----------------------------------------------------------------------|------------------|--------|--------|--------|------|
| b4galnt4    | beta-1,4-N-acetyl-<br>galactosaminyltra<br>nsferase<br>4(B4GALNT4)    | NM_17853<br>7    | 89.4   | 99.2   | 0.0210 | 1.19 |
| TRMT10<br>A | tRNA<br>methyltransferase<br>10A(TRMT10A)                             | NM_15229<br>2    | 95     | 101    | 0.0210 | 1.15 |
| GAPT        | GRB2 binding<br>adaptor protein,<br>transmembrane(G<br>APT)           | NM_15268<br>7    | 112.4  | 107.4  | 0.0210 | 0.79 |
| GAPT        | GRB2 binding<br>adaptor protein,<br>transmembrane(G<br>APT)           | NM_15268<br>7    | 154.8  | 109.6  | 0.0210 | 0.79 |
| OR52E5      | olfactory receptor<br>family 52<br>subfamily E<br>member<br>5(OR52E5) | NM_00100<br>5166 | 106.9  | 85.8   | 0.0210 | 0.84 |
| ACY3        | aminoacylase<br>3(ACY3)                                               | NM_08065<br>8    | 147.2  | 108.7  | 0.0210 | 0.81 |
| SLC35E<br>1 | solute carrier<br>family 35 member<br>E1(SLC35E1)                     | NM_02488<br>1    | 109.2  | 105.9  | 0.0210 | 1.07 |
| SLC35E<br>1 | solute carrier<br>family 35 member<br>E1(SLC35E1)                     | NM_02488<br>1    | 1302.4 | 1529.4 | 0.0210 | 1.07 |
|             |                                                                       | AI349750         | 87     | 96.5   | 0.0210 | 1.18 |

|         |                                                              |              |       |       |        |      |              |            |
|---------|--------------------------------------------------------------|--------------|-------|-------|--------|------|--------------|------------|
| CTDSP1  | CTD small phosphatase 1(CTDSP1)                              | NM_021198    | 113.3 | 90.5  | 0.0210 | 0.83 |              |            |
| CTDSP1  | CTD small phosphatase 1(CTDSP1)                              | NM_021198    | 310.6 | 287.9 | 0.0210 | 0.83 |              |            |
| CEP85L  | centrosomal protein 85 like(CEP85L)                          | NM_001042475 | 107.7 | 125   | 0.0210 | 1.29 |              |            |
| PYM1    | PYM homolog 1, exon junction complex associated factor(PYM1) | NM_032345    | 107.5 | 121.7 | 0.0210 | 1.26 |              |            |
| BLMH    | bleomycin hydrolase(BLMH)                                    | NM_000386    | 127.3 | 147.7 | 0.0210 | 1.32 | NM_001270681 | 26.79 0.09 |
| SAMD1   | sterile alpha motif domain containing 1(SAMD1)               | NM_138352    | 109   | 118.2 | 0.0210 | 1.2  |              |            |
|         |                                                              | DB305811     | 125.1 | 103   | 0.0210 | 0.88 |              |            |
| RAD54L2 | RAD54-like 2 (S. cerevisiae)(RAD54L2)                        | NM_015106    | 116.7 | 128   | 0.0210 | 1.24 |              |            |
|         |                                                              | XM_001717507 | 150.8 | 111.1 | 0.0210 | 0.82 |              |            |
| rn7sk   | RNA, 7SK small nuclear(RN7SK)                                | NR_001445    | 279   | 410.6 | 0.0210 | 1.64 |              |            |
| KDM2B   | lysine demethylase 2B(KDM2B)                                 | NM_001005366 | 279.2 | 159.7 | 0.0210 | 0.66 |              |            |



|         |                                                                    |              |       |       |        |      |           |        |      |
|---------|--------------------------------------------------------------------|--------------|-------|-------|--------|------|-----------|--------|------|
| ACTR5   | ARP5 actin-related protein 5 homolog(ACTR5)                        | NM_024855    | 125.2 | 130.7 | 0.0220 | 1.19 | NM_019373 | 263.23 | 1.01 |
|         |                                                                    | AA744250     | 147   | 153.4 | 0.0220 | 1.2  |           |        |      |
| FAM156A | family with sequence similarity 156 member A(FAM156A)              | NM_014138    | 278.8 | 299.8 | 0.0220 | 1.23 |           |        |      |
| NKTR    | natural killer cell triggering receptor(NKTR)                      | NM_005385    | 168.2 | 216.3 | 0.0220 | 1.44 |           |        |      |
| MITD1   | microtubule interacting and trafficking domain containing 1(MITD1) | NM_138798    | 146.5 | 173.7 | 0.0220 | 1.34 |           |        |      |
| GRK4    | G protein-coupled receptor kinase 4(GRK4)                          | NM_001004056 | 119.5 | 164.7 | 0.0220 | 1.54 |           |        |      |
| ANKRD6  | ankyrin repeat domain 6(ANKRD6)                                    | NM_014942    | 102.3 | 104.5 | 0.0220 | 1.12 |           |        |      |
| STX11   | syntaxin 11(STX11)                                                 | NM_003764    | 104.9 | 159.5 | 0.0220 | 1.71 |           |        |      |
| CCDC130 | coiled-coil domain containing 130(CCDC130)                         | NM_030818    | 407.7 | 487.2 | 0.0220 | 1.38 |           |        |      |

|         |                                                                |           |       |       |        |      |           |        |         |
|---------|----------------------------------------------------------------|-----------|-------|-------|--------|------|-----------|--------|---------|
| BRD3    | bromodomain containing 3(BRD3)                                 | NM_007371 | 227.9 | 287.9 | 0.0220 | 1.46 |           |        |         |
| RBMS1   | RNA binding motif single stranded interacting protein 1(RBMS1) | NM_002897 | 134.1 | 162   | 0.0220 | 1.66 |           |        |         |
| RBMS1   | RNA binding motif single stranded interacting protein 1(RBMS1) | NM_002897 | 293.1 | 431.7 | 0.0220 | 1.66 |           |        |         |
| RBMS1   | RNA binding motif single stranded interacting protein 1(RBMS1) | NM_002897 | 337.9 | 419.5 | 0.0220 | 1.66 | NM_012778 | 744.78 | 0.71    |
| ZMYND12 | zinc finger MYND-type containing 12(ZMYND12)                   | NM_032257 | 198.3 | 130.4 | 0.0220 | 0.73 | NM_012778 | 744.78 | 0.71    |
|         |                                                                | BX101207  | 106.6 | 112.6 | 0.0220 | 1.18 |           |        |         |
| TTC14   | tetratricopeptide repeat domain 14(TTC14)                      | NM_133462 | 297   | 398.9 | 0.0220 | 1.52 |           |        |         |
| AKAP13  | A-kinase anchoring protein 13(AKAP13)                          | NM_006738 | 144.6 | 168.4 | 0.0220 | 1.32 | NM_012909 | 6.73   | 5427.66 |

|         |                                                                   |              |       |       |        |      |           |       |        |
|---------|-------------------------------------------------------------------|--------------|-------|-------|--------|------|-----------|-------|--------|
| GNAQ    | G protein subunit alpha q(GNAQ)                                   | NM_002072    | 128.9 | 101.4 | 0.0220 | 0.86 | NM_022181 | 0.40  | 160.77 |
|         |                                                                   | XM_001724189 | 130.5 | 148.3 | 0.0220 | 1.26 | NM_019157 | 14.48 | 0.05   |
| SOX17   | SRY-box 17(SOX17)                                                 | NM_022454    | 98.6  | 119.6 | 0.0220 | 1.34 |           |       |        |
| SNORD16 | small nucleolar RNA, C/D box 16(SNORD16)                          | NR_002440    | 112.6 | 132.5 | 0.0220 | 1.3  |           |       |        |
| LRRCC1  | leucine rich repeat and coiled-coil centrosomal protein 1(LRRCC1) | NM_033402    | 122.6 | 101.1 | 0.0220 | 1.3  |           |       |        |
| LRRCC1  | leucine rich repeat and coiled-coil centrosomal protein 1(LRRCC1) | NM_033402    | 127.3 | 153.5 | 0.0220 | 1.3  |           |       |        |
| RNU4-1  | RNA, U4 small nuclear 1(RNU4-1)                                   | NR_003925    | 111.3 | 120.7 | 0.0220 | 1.21 |           |       |        |
| slc26a6 | solute carrier family 26 member 6(SLC26A6)                        | NM_001040454 | 107.9 | 88.9  | 0.0220 | 0.87 |           |       |        |
| tmem187 | transmembrane protein 187(TMEM187)                                | NM_003492    | 102.1 | 113   | 0.0220 | 1.2  |           |       |        |

|         |                                                                     |              |       |        |        |      |
|---------|---------------------------------------------------------------------|--------------|-------|--------|--------|------|
| FEN1    | flap structure-specific endonuclease 1(FEN1)                        | NM_004111_1  | 99.3  | 109.8  | 0.0220 | 1.21 |
| FEN1    | flap structure-specific endonuclease 1(FEN1)                        | NM_004111_1  | 131.7 | 154.5  | 0.0220 | 1.21 |
| YY1     | YY1 transcription factor(YY1)                                       | NM_003403    | 276.4 | 282.3  | 0.0220 | 1.58 |
| YY1     | YY1 transcription factor(YY1)                                       | NM_003403    | 728.1 | 1066.2 | 0.0220 | 1.58 |
| SNRPB2  | small nuclear ribonucleoprotein polypeptide B2(SNRPB2)              | NM_003092    | 216.6 | 153.9  | 0.0230 | 0.81 |
| LIG3    | DNA ligase 3(LIG3)                                                  | NM_002311    | 98.5  | 106    | 0.0230 | 1.16 |
|         |                                                                     | XM_937260    | 104.3 | 109    | 0.0230 | 1.15 |
| NPIPB15 | nuclear pore complex interacting protein family member B15(NPIPB15) | NM_001018059 | 118.4 | 98.7   | 0.0230 | 0.89 |

|             |                                                                                                         |               |       |       |        |      |               |      |       |
|-------------|---------------------------------------------------------------------------------------------------------|---------------|-------|-------|--------|------|---------------|------|-------|
| YWHAE       | tyrosine 3-<br>monooxygenase/<br>tryptophan 5-<br>monooxygenase<br>activation protein<br>epsilon(YWHAE) | NM_00676<br>1 | 109   | 115.5 | 0.0230 | 1.18 |               |      |       |
| B3GAT1      | beta-1,3-<br>glucuronyltransfer<br>ase 1(B3GAT1)                                                        | NM_05402<br>5 | 171.9 | 123.6 | 0.0230 | 0.82 |               |      |       |
| PIWIL4      | piwi like RNA-<br>mediated gene<br>silencing<br>4(PIWIL4)                                               | NM_15243<br>1 | 87.6  | 97.7  | 0.0230 | 1.2  |               |      |       |
| STX18       | syntaxin<br>18(STX18)                                                                                   | NM_01693<br>0 | 113.5 | 96.4  | 0.0230 | 0.9  |               |      |       |
|             |                                                                                                         | BF509118      | 115.1 | 123.4 | 0.0230 | 1.2  |               |      |       |
| C3orf62     | chromosome 3<br>open reading<br>frame 62(C3orf62)                                                       | NM_19856<br>2 | 105.3 | 110.3 | 0.0230 | 1.15 |               |      |       |
| NDUFA<br>F7 | NADH:ubiquinone<br>oxidoreductase<br>complex<br>assembly factor<br>7(NDUFAF7)                           | NM_14473<br>6 | 122.7 | 114.2 | 0.0230 | 1.36 |               |      |       |
| NDUFA<br>F7 | NADH:ubiquinone<br>oxidoreductase<br>complex<br>assembly factor<br>7(NDUFAF7)                           | NM_14473<br>6 | 296.5 | 349.9 | 0.0230 | 1.36 | NM_0191<br>68 | 8.26 | 61.49 |

|        |                                                                          |                  |       |       |        |      |
|--------|--------------------------------------------------------------------------|------------------|-------|-------|--------|------|
| ZNF263 | zinc finger protein<br>263(ZNF263)                                       | NM_00574<br>1    | 160.8 | 181.7 | 0.0230 | 1.29 |
|        |                                                                          | XR_04087<br>3    | 110.8 | 93.1  | 0.0230 | 0.88 |
| RNF115 | ring finger protein<br>115(RNF115)                                       | NM_01445<br>5    | 126.8 | 145.2 | 0.0230 | 1.55 |
| RNF115 | ring finger protein<br>115(RNF115)                                       | NM_01445<br>5    | 462.1 | 652.9 | 0.0230 | 1.55 |
| RUFY3  | RUN and FYVE<br>domain<br>containing<br>3(RUFY3)                         | NM_00103<br>7442 | 104   | 106.6 | 0.0230 | 1.13 |
| RUFY3  | RUN and FYVE<br>domain<br>containing<br>3(RUFY3)                         | NM_00103<br>7442 | 349.3 | 389.7 | 0.0230 | 1.13 |
| PICALM | phosphatidylinosit<br>ol binding clathrin<br>assembly<br>protein(PICALM) | NM_00716<br>6    | 121.6 | 97.9  | 0.0230 | 0.84 |
| PICALM | phosphatidylinosit<br>ol binding clathrin<br>assembly<br>protein(PICALM) | NM_00716<br>6    | 866.6 | 648.3 | 0.0230 | 0.84 |
|        |                                                                          | BX111977         | 120.5 | 101.4 | 0.0240 | 0.91 |
| MBTPS1 | membrane bound<br>transcription factor<br>peptidase, site<br>1(MBTPS1)   | NM_00379<br>1    | 166.4 | 156.6 | 0.0240 | 1.21 |

|          |                                                                         |              |        |       |        |      |
|----------|-------------------------------------------------------------------------|--------------|--------|-------|--------|------|
| MBTPS1   | membrane bound transcription factor peptidase, site 1(MBTPS1)           | NM_003791    | 182.9  | 195.8 | 0.0240 | 1.21 |
| C11orf57 | chromosome 11 open reading frame 57(C11orf57)                           | NM_018195    | 191.7  | 142.5 | 0.0240 | 0.84 |
| ARF1     | ADP ribosylation factor 1(ARF1)                                         | NM_001024227 | 1348.5 | 902.1 | 0.0240 | 0.76 |
|          |                                                                         | XM_939026    | 127.1  | 102.8 | 0.0240 | 0.88 |
| VPS37D   | VPS37D, ESCRT-I subunit(VPS37D)                                         | NM_001077621 | 567.1  | 324.4 | 0.0240 | 0.65 |
| GPATCH4  | G-patch domain containing 4(GPATCH4)                                    | NM_182679    | 97.6   | 98    | 0.0240 | 0.89 |
| GPATCH4  | G-patch domain containing 4(GPATCH4)                                    | NM_182679    | 117.7  | 97.8  | 0.0240 | 0.89 |
| ZNF366   | zinc finger protein 366(ZNF366)                                         | NM_152625    | 114.4  | 122.4 | 0.0240 | 1.19 |
| SPDYE8P  | speedy/RINGO cell cycle regulator family member E8, pseudogene(SPDYE8P) | NR_003664    | 157.4  | 106.3 | 0.0240 | 0.75 |

|         |                                                                                         |                  |         |        |        |      |
|---------|-----------------------------------------------------------------------------------------|------------------|---------|--------|--------|------|
| SPDYE8P | speedy/RINGO<br>cell cycle<br>regulator family<br>member E8,<br>pseudogene(SPD<br>YE8P) | NR_00366<br>4    | 11806.9 | 13009  | 0.0240 | 0.75 |
| SCP2    | sterol carrier<br>protein 2(SCP2)                                                       | NM_00100<br>7098 | 286     | 178.5  | 0.0240 | 0.73 |
| nth1    | nth like DNA<br>glycosylase<br>1(NTHL1)                                                 | NM_00252<br>8    | 119.6   | 131.8  | 0.0240 | 1.24 |
| ZBTB8A  | zinc finger and<br>BTB domain<br>containing<br>8A(ZBTB8A)                               | NM_00104<br>0441 | 102.8   | 114.1  | 0.0240 | 1.21 |
| MATR3   | matrin 3(MATR3)                                                                         | NM_19918<br>9    | 97.7    | 91.5   | 0.0240 | 1.15 |
| MATR3   | matrin 3(MATR3)                                                                         | NM_19918<br>9    | 100.8   | 107.2  | 0.0240 | 1.15 |
| MATR3   | matrin 3(MATR3)                                                                         | NM_19918<br>9    | 1659.9  | 2099.5 | 0.0240 | 1.15 |
| BRPF1   | bromodomain and<br>PHD finger<br>containing<br>1(BRPF1)                                 | NM_00463<br>4    | 432.9   | 664.6  | 0.0240 | 1.72 |
| TLDC1   | TBC/LysM-<br>associated<br>domain<br>containing<br>1(TLDC1)                             | NM_02094<br>7    | 99.8    | 102.9  | 0.0240 | 1.12 |



|         |                                                                                                                               |                  |       |       |        |      |
|---------|-------------------------------------------------------------------------------------------------------------------------------|------------------|-------|-------|--------|------|
| SMARCC2 | SWI/SNF related,<br>matrix associated,<br>actin dependent<br>regulator of<br>chromatin<br>subfamily c<br>member<br>2(SMARCC2) | NM_13906<br>7    | 248.7 | 301.3 | 0.0240 | 1.35 |
| ZNF676  | zinc finger protein<br>676(ZNF676)                                                                                            | XR_01890<br>4    | 123.1 | 133.3 | 0.0240 | 1.22 |
|         |                                                                                                                               | NM_00100<br>1411 | 102.6 | 106.4 | 0.0240 | 1.14 |
|         |                                                                                                                               | XM_00172<br>4301 | 101.8 | 105.2 | 0.0240 | 1.13 |
| GLMN    | glomulin, FKBP<br>associated<br>protein(GLMN)                                                                                 | NM_05327<br>4    | 222.4 | 274.3 | 0.0240 | 1.4  |
|         |                                                                                                                               | XM_00172<br>4735 | 153.2 | 167.9 | 0.0240 | 1.25 |
| DDX19B  | DEAD-box<br>helicase<br>19B(DDX19B)                                                                                           | NM_00101<br>4449 | 124   | 132.7 | 0.0240 | 1.19 |
|         |                                                                                                                               | XM_92730<br>6    | 111.3 | 93.2  | 0.0240 | 0.86 |
| PRR19   | proline rich<br>19(PRR19)                                                                                                     | NM_19928<br>5    | 131.5 | 107.1 | 0.0240 | 0.88 |

|             |                                                                          |                  |        |       |        |      |
|-------------|--------------------------------------------------------------------------|------------------|--------|-------|--------|------|
| CMTM3       | CKLF like<br>MARVEL<br>transmembrane<br>domain<br>containing<br>3(CMTM3) | NM_18155<br>3    | 186.3  | 132   | 0.0240 | 0.81 |
| UBE2O       | ubiquitin<br>conjugating<br>enzyme E2<br>O(UBE2O)                        | NM_02206<br>6    | 133.9  | 143.6 | 0.0240 | 1.19 |
|             |                                                                          | XM_93918<br>6    | 159    | 190.9 | 0.0240 | 1.38 |
| ANAPC<br>11 | anaphase<br>promoting<br>complex subunit<br>11(ANAPC11)                  | NM_00100<br>2246 | 106.2  | 112.6 | 0.0240 | 1.17 |
| ANAPC<br>11 | anaphase<br>promoting<br>complex subunit<br>11(ANAPC11)                  | NM_00100<br>2246 | 414    | 382.8 | 0.0240 | 1.17 |
| AGXT        | alanine-glyoxylate<br>aminotransferase(<br>AGXT)                         | NM_00003<br>0    | 1763.1 | 657.1 | 0.0240 | 0.42 |
| PHF20L<br>1 | PHD finger<br>protein 20-like<br>1(PHF20L1)                              | NM_19851<br>3    | 97.4   | 107.4 | 0.0240 | 1.19 |
| NSA2        | NSA2, ribosome<br>biogenesis<br>homolog(NSA2)                            | NM_01488<br>6    | 1103.8 | 1275  | 0.0240 | 1.26 |

|          |                                                         |              |        |       |        |      |              |            |
|----------|---------------------------------------------------------|--------------|--------|-------|--------|------|--------------|------------|
| NSA2     | NSA2, ribosome biogenesis homolog(NSA2)                 | NM_014886    | 1434.7 | 1488  | 0.0240 | 1.26 |              |            |
| RAP2B    | RAP2B, member of RAS oncogene family(RAP2B)             | NM_002886    | 227.5  | 151   | 0.0250 | 0.75 |              |            |
| or114    | olfactory receptor family 1 subfamily L member 4(OR1L4) | NM_001005235 | 103.7  | 95.1  | 0.0250 | 0.88 |              |            |
| or114    | olfactory receptor family 1 subfamily L member 4(OR1L4) | NM_001005235 | 144.4  | 115.3 | 0.0250 | 0.88 | NM_001106061 | 2.22 12.22 |
| NOC3L    | NOC3 like DNA replication regulator(NOC3L)              | NM_022451    | 160.2  | 214.1 | 0.0250 | 1.53 |              |            |
| HEATR6   | HEAT repeat containing 6(HEATR6)                        | NM_022070    | 154.9  | 206.3 | 0.0250 | 1.47 |              |            |
| EP400    | E1A binding protein p400(EP400)                         | NM_015409    | 131.6  | 145.5 | 0.0250 | 1.24 |              |            |
| KIAA0430 | KIAA0430(KIAA0430)                                      | NM_014647    | 369.1  | 401.5 | 0.0250 | 1.25 |              |            |
| SNORA14B | small nucleolar RNA, H/ACA box 14B(SNORA14B)            | NR_002956    | 106.5  | 108.6 | 0.0250 | 1.11 |              |            |

|        |                                                                                                              |           |       |       |        |      |
|--------|--------------------------------------------------------------------------------------------------------------|-----------|-------|-------|--------|------|
| NUB1   | negative regulator of ubiquitin like proteins 1(NUB1)                                                        | NM_016118 | 128.1 | 103   | 0.0250 | 0.88 |
| NUB1   | negative regulator of ubiquitin like proteins 1(NUB1)                                                        | NM_016118 | 364.7 | 343.6 | 0.0250 | 0.88 |
|        |                                                                                                              | XM_926147 | 99    | 105.4 | 0.0250 | 1.15 |
| ATOH8  | atonal bHLH transcription factor 8(ATOH8)                                                                    | NM_032827 | 99.4  | 117.3 | 0.0250 | 1.32 |
| mthfd2 | methylenetetrahydrofolate dehydrogenase (NADP+ dependent) 2, methenyltetrahydrofolate cyclohydrolase(MTHFD2) | NM_006636 | 89    | 98    | 0.0250 | 1.19 |
| CEPT1  | choline/ethanolamine phosphotransferase 1(CEPT1)                                                             | NM_006090 | 332.9 | 524.5 | 0.0250 | 1.81 |
| TRIM9  | tripartite motif containing 9(TRIM9)                                                                         | NM_015163 | 122.3 | 98.1  | 0.0250 | 0.87 |
|        |                                                                                                              | XR_039516 | 112.6 | 92.6  | 0.0250 | 0.88 |

|            |                                                   |                  |        |        |        |      |
|------------|---------------------------------------------------|------------------|--------|--------|--------|------|
|            |                                                   | XR_03951<br>6    | 184.9  | 188.3  | 0.0250 | 0.88 |
| USP19      | ubiquitin specific<br>peptidase<br>19(USP19)      | NM_00667<br>7    | 107.6  | 113.3  | 0.0250 | 1.16 |
| PLAGL1     | PLAG1 like zinc<br>finger 1(PLAGL1)               | NM_00108<br>0952 | 113.4  | 119.2  | 0.0250 | 1.18 |
| SFSWA<br>P | splicing factor<br>SWAP<br>homolog(SFSWA<br>P)    | NM_00459<br>2    | 143.9  | 155.8  | 0.0250 | 1.22 |
| NUDT6      | nudix hydrolase<br>6(NUDT6)                       | NM_00708<br>3    | 115.7  | 102.6  | 0.0250 | 0.79 |
| NUDT6      | nudix hydrolase<br>6(NUDT6)                       | NM_00708<br>3    | 132.2  | 110.8  | 0.0250 | 0.79 |
| NUDT6      | nudix hydrolase<br>6(NUDT6)                       | NM_00708<br>3    | 172    | 122.8  | 0.0250 | 0.79 |
| GJC2       | gap junction<br>protein gamma<br>2(GJC2)          | NM_02043<br>5    | 189.5  | 133.9  | 0.0250 | 0.79 |
|            |                                                   | XR_01749<br>2    | 128.7  | 162.5  | 0.0250 | 1.46 |
|            |                                                   | XR_01749<br>2    | 153.4  | 141.9  | 0.0250 | 1.46 |
|            |                                                   | XR_01749<br>2    | 1141.3 | 1826.9 | 0.0250 | 1.46 |
| UBAP2L     | ubiquitin<br>associated protein<br>2 like(UBAP2L) | NM_01484<br>7    | 224    | 284.6  | 0.0250 | 1.42 |

|          |                                                          |           |       |       |        |      |
|----------|----------------------------------------------------------|-----------|-------|-------|--------|------|
| TSC1     | tuberous sclerosis 1(TSC1)                               | NM_000368 | 127.4 | 116.9 | 0.0250 | 1.19 |
| TSC1     | tuberous sclerosis 1(TSC1)                               | NM_000368 | 177.3 | 183.4 | 0.0250 | 1.19 |
| TSC1     | tuberous sclerosis 1(TSC1)                               | NM_000368 | 444.8 | 471.5 | 0.0250 | 1.19 |
| AP2A2    | adaptor related protein complex 2 alpha 2 subunit(AP2A2) | NM_012305 | 128.7 | 100.4 | 0.0250 | 0.85 |
| PIH1D1   | PIH1 domain containing 1(PIH1D1)                         | NM_017916 | 186.1 | 209.3 | 0.0260 | 1.27 |
| FAM32A   | family with sequence similarity 32 member A(FAM32A)      | NM_014077 | 132.7 | 153.7 | 0.0260 | 1.31 |
| SNORA70C | small nucleolar RNA, H/ACA box 70C(SNORA70C)             | NR_003708 | 127   | 129.6 | 0.0260 | 1.13 |
|          |                                                          | XR_037303 | 112.5 | 92.1  | 0.0260 | 0.86 |
| P2RY6    | pyrimidinergic receptor P2Y6(P2RY6)                      | NM_176796 | 93.7  | 109.9 | 0.0260 | 1.29 |
| HPN      | hepsin(HPN)                                              | NM_002151 | 329.3 | 231.5 | 0.0260 | 0.53 |
| HPN      | hepsin(HPN)                                              | NM_002151 | 739.4 | 351.3 | 0.0260 | 0.53 |

|              |                                                                                  |                  |       |       |        |      |
|--------------|----------------------------------------------------------------------------------|------------------|-------|-------|--------|------|
| CASP2        | caspase<br>2(CASP2)<br>protein                                                   | NM_03298<br>3    | 106.4 | 120.7 | 0.0260 | 1.26 |
| PPP1R1<br>2B | phosphatase 1<br>regulatory subunit<br>12B(PPP1R12B)                             | NM_03210<br>3    | 94    | 98.1  | 0.0260 | 1.12 |
| PPP1R1<br>2B | protein<br>phosphatase 1<br>regulatory subunit<br>12B(PPP1R12B)                  | NM_03210<br>3    | 101.4 | 103.6 | 0.0260 | 1.12 |
| RAB20        | RAB20, member<br>RAS oncogene<br>family(RAB20)                                   | NM_01781<br>7    | 102.9 | 105.4 | 0.0260 | 1.13 |
| UQCR1<br>1   | ubiquinol-<br>cytochrome c<br>reductase,<br>complex III<br>subunit<br>XI(UQCR11) | NM_00683<br>0    | 126.6 | 102.6 | 0.0260 | 0.88 |
| pik3r6       | phosphoinositide-<br>3-kinase<br>regulatory subunit<br>6(PIK3R6)                 | NM_00101<br>0855 | 148.7 | 110.2 | 0.0260 | 0.83 |
| RAD52        | RAD52 homolog,<br>DNA repair<br>protein(RAD52)                                   | NM_13442<br>4    | 108.8 | 92.2  | 0.0260 | 0.88 |

|       |                                                                                       |                  |       |       |        |      |                  |      |
|-------|---------------------------------------------------------------------------------------|------------------|-------|-------|--------|------|------------------|------|
| SC5D  | sterol-C5-<br>desaturase(SC5D<br>)                                                    | NM_00691<br>8    | 532.6 | 324.3 | 0.0260 | 0.69 |                  |      |
|       |                                                                                       | XM_93867<br>1    | 117.4 | 122.6 | 0.0260 | 1.16 |                  |      |
|       |                                                                                       | XM_93633<br>3    | 109.8 | 113.2 | 0.0260 | 1.14 |                  |      |
| RAE1  | ribonucleic acid<br>export 1(RAE1)                                                    | NM_00361<br>0    | 128.1 | 100.3 | 0.0260 | 0.86 |                  |      |
| RAE1  | ribonucleic acid<br>export 1(RAE1)                                                    | NM_00361<br>0    | 281.3 | 269.9 | 0.0260 | 0.86 |                  |      |
|       |                                                                                       | XM_00172<br>0371 | 96.9  | 103.9 | 0.0260 | 1.17 |                  |      |
|       |                                                                                       | XM_00171<br>5936 | 103.4 | 109.1 | 0.0260 | 1.15 |                  |      |
| STT3B | STT3B, catalytic<br>subunit of the<br>oligosaccharyltran<br>sferase<br>complex(STT3B) | NM_17886<br>2    | 163.6 | 188.3 | 0.0260 | 1.28 |                  |      |
|       |                                                                                       | XM_93809<br>3    | 97.3  | 110   | 0.0260 | 1.23 |                  |      |
|       |                                                                                       | XM_93809<br>3    | 150.6 | 186   | 0.0260 | 1.23 |                  |      |
|       |                                                                                       | XM_93327<br>5    | 119.4 | 98.7  | 0.0260 | 0.9  |                  |      |
| SMYD5 | SMYD family<br>member<br>5(SMYD5)                                                     | NM_00606<br>2    | 194.1 | 143.4 | 0.0260 | 0.84 |                  |      |
|       |                                                                                       | XM_93132<br>9    | 116.3 | 95.5  | 0.0260 | 0.87 | NM_0010<br>14273 | 3.32 |



|         |                                                     |              |       |        |        |      |              |      |       |
|---------|-----------------------------------------------------|--------------|-------|--------|--------|------|--------------|------|-------|
| CCNY    | cyclin Y(CCNY)                                      | NM_145012    | 202.3 | 272.5  | 0.0260 | 1.45 | NM_001014273 | 3.32 | 15.01 |
| NICN1   | nicolin 1(NICN1)                                    | NM_032316    | 103.3 | 107    | 0.0260 | 1.13 | NM_001014273 | 3.32 | 15.01 |
| LCOR    | ligand dependent nuclear receptor corepressor(LCOR) | NM_032440    | 125.2 | 111.6  | 0.0260 | 1.28 |              |      |       |
| LCOR    | ligand dependent nuclear receptor corepressor(LCOR) | NM_032440    | 139.9 | 164.1  | 0.0260 | 1.28 |              |      |       |
| aire    | autoimmune regulator(AIRE)                          | NM_000658    | 101.8 | 106.7  | 0.0260 | 1.16 |              |      |       |
| SLC13A2 | solute carrier family 13 member 2(SLC13A2)          | NM_003984    | 281.3 | 166.8  | 0.0260 | 0.68 |              |      |       |
| SCNM1   | sodium channel modifier 1(SCNM1)                    | NM_024041    | 113   | 110.4  | 0.0260 | 1.18 |              |      |       |
| SCNM1   | sodium channel modifier 1(SCNM1)                    | NM_024041    | 138.3 | 145.4  | 0.0260 | 1.18 |              |      |       |
| ZNF786  | zinc finger protein 786(ZNF786)                     | NM_152411    | 966.8 | 1160.6 | 0.0270 | 1.39 |              |      |       |
| NFASC   | neurofascin(NFASC)                                  | NM_001005387 | 114.6 | 98.2   | 0.0270 | 0.92 |              |      |       |
|         |                                                     | XM_001132115 | 157.4 | 100.9  | 0.0270 | 0.71 |              |      |       |

|         |                                                    |              |       |       |        |      |
|---------|----------------------------------------------------|--------------|-------|-------|--------|------|
| TARBP1  | TAR (HIV-1) RNA binding protein 1(TARBP1)          | NM_005646    | 113.6 | 122.8 | 0.0270 | 1.22 |
|         |                                                    | XR_017629    | 115.4 | 126.5 | 0.0270 | 1.23 |
| CPNE6   | copine 6(CPNE6)                                    | NM_006032    | 260.4 | 119.5 | 0.0270 | 0.53 |
| MIR488  | microRNA 488(MIR488)                               | NR_030163    | 117.2 | 99.1  | 0.0270 | 0.91 |
| METTL15 | methyltransferase like 15(METTL15)                 | NM_152636    | 107.7 | 111.2 | 0.0270 | 1.13 |
| DDX52   | DExD-box helicase 52(DDX52)                        | NM_007010    | 294.2 | 333.2 | 0.0270 | 1.27 |
| TANGO2  | transport and golgi organization 2 homolog(TANGO2) | NM_152906    | 113.2 | 138.2 | 0.0270 | 1.37 |
|         |                                                    | XM_001725354 | 119.8 | 95.8  | 0.0270 | 0.87 |
| MNT     | MAX network transcriptional repressor(MNT)         | NM_020310    | 152   | 167.2 | 0.0270 | 1.23 |
| ZNF274  | zinc finger protein 274(ZNF274)                    | NM_016324    | 126.2 | 99.8  | 0.0270 | 0.86 |
| GON4L   | gon-4 like(GON4L)                                  | NM_001037533 | 277.2 | 349.3 | 0.0270 | 1.49 |
|         |                                                    | XR_038286    | 110.5 | 87.6  | 0.0270 | 0.83 |

|         |                                                                 |           |        |        |        |      |
|---------|-----------------------------------------------------------------|-----------|--------|--------|--------|------|
| CHCHD1  | coiled-coil-helix-coiled-coil-helix domain containing 1(CHCHD1) | NM_203298 | 111.9  | 115.8  | 0.0270 | 1.15 |
| TUBB3   | tubulin beta 3 class III(TUBB3)                                 | NM_006086 | 144.5  | 111.1  | 0.0270 | 0.85 |
| RNASEH1 | ribonuclease H1(RNASEH1)                                        | NM_002936 | 114.7  | 123.8  | 0.0270 | 1.22 |
|         |                                                                 | NM_183041 | 112.9  | 94.4   | 0.0270 | 0.89 |
|         |                                                                 | XM_498608 | 115.6  | 95.9   | 0.0270 | 0.9  |
| TSPAN31 | tetraspanin 31(TSPAN31)                                         | NM_005981 | 261.6  | 280.4  | 0.0270 | 1.22 |
| TRAF7   | TNF receptor associated factor 7(TRAF7)                         | NM_032271 | 132.5  | 127.3  | 0.0270 | 0.85 |
| TRAF7   | TNF receptor associated factor 7(TRAF7)                         | NM_032271 | 141.6  | 109    | 0.0270 | 0.85 |
|         |                                                                 | XR_016218 | 303.5  | 114.4  | 0.0280 | 0.43 |
|         |                                                                 | XM_944104 | 172.2  | 99.2   | 0.0280 | 0.65 |
|         |                                                                 | XM_944104 | 2909.6 | 2692.8 | 0.0280 | 0.65 |
| ODF3L2  | outer dense fiber of sperm tails 3 like 2(ODF3L2)               | NM_182577 | 137.8  | 111.1  | 0.0280 | 0.89 |

|        |                                                                 |                  |       |       |        |      |
|--------|-----------------------------------------------------------------|------------------|-------|-------|--------|------|
| ACYP2  | acylphosphatase<br>2(ACYP2)                                     | NM_13844<br>8    | 183   | 134.3 | 0.0280 | 0.83 |
| ACYP2  | acylphosphatase<br>2(ACYP2)                                     | NM_13844<br>8    | 255.9 | 167.5 | 0.0280 | 0.83 |
| ZNF304 | zinc finger protein<br>304(ZNF304)                              | NM_02065<br>7    | 105.8 | 107.2 | 0.0280 | 1.12 |
| SERF1B | small EDRK-rich<br>factor<br>1B(SERF1B)                         | NM_02297<br>8    | 111.8 | 88    | 0.0280 | 0.84 |
| ARID4A | AT-rich interaction<br>domain<br>4A(ARID4A)                     | NM_02300<br>1    | 101.7 | 106.8 | 0.0280 | 1.15 |
| plxdc2 | plexin domain<br>containing<br>2(PLXDC2)                        | NM_03281<br>2    | 118.9 | 137.3 | 0.0280 | 1.28 |
| RALGDS | ral guanine<br>nucleotide<br>dissociation<br>stimulator(RALGDS) | NM_00626<br>6    | 252.8 | 476.7 | 0.0280 | 2.11 |
| LILRB5 | leukocyte<br>immunoglobulin<br>like receptor<br>B5(LILRB5)      | NM_00684<br>0    | 108.6 | 111.5 | 0.0280 | 1.1  |
|        |                                                                 | XM_93214<br>3    | 190.8 | 215.8 | 0.0280 | 1.27 |
|        |                                                                 | XR_01560<br>9    | 111.5 | 95.8  | 0.0280 | 0.92 |
|        |                                                                 | XM_00171<br>8130 | 127.1 | 100.9 | 0.0280 | 0.87 |

|         |                                                |              |       |       |        |      |
|---------|------------------------------------------------|--------------|-------|-------|--------|------|
| f8a1    | coagulation factor VIII-associated 1(F8A1)     | NM_012151    | 233.4 | 159.3 | 0.0280 | 0.78 |
| RARRES1 | retinoic acid receptor responder 1(RARRES1)    | NM_206963    | 92.6  | 104.2 | 0.0280 | 1.23 |
| HOXC13  | homeobox C13(HOXC13)                           | NM_017410    | 116.4 | 92.7  | 0.0280 | 0.84 |
| MOSPD2  | motile sperm domain containing 2(MOSPD2)       | NM_152581    | 122.9 | 101.6 | 0.0280 | 1.25 |
| MOSPD2  | motile sperm domain containing 2(MOSPD2)       | NM_152581    | 151.1 | 169.8 | 0.0280 | 1.25 |
| UBE2Z   | ubiquitin conjugating enzyme E2 Z(UBE2Z)       | NM_023079    | 116.7 | 129   | 0.0280 | 1.24 |
| AJAP1   | adherens junctions associated protein 1(AJAP1) | NM_001042478 | 103.6 | 117.8 | 0.0280 | 1.26 |
|         |                                                | XR_037881    | 112.8 | 93.1  | 0.0280 | 0.86 |
|         |                                                | XR_037881    | 835.7 | 882.2 | 0.0280 | 0.86 |

|            |                                                                     |              |        |       |        |      |
|------------|---------------------------------------------------------------------|--------------|--------|-------|--------|------|
| CDKN2AIPNL | CDKN2A interacting protein N-terminal like(CDKN2AIPNL)              | NM_080656    | 9284.9 | 11373 | 0.0280 | 1.34 |
|            |                                                                     | XM_927976    | 84.7   | 96.2  | 0.0280 | 1.2  |
| SLC35D1    | solute carrier family 35 member D1(SLC35D1)                         | NM_015139    | 113    | 96.2  | 0.0280 | 0.91 |
| ALS2CL     | ALS2 C-terminal like(ALS2CL)                                        | NM_182775    | 122.6  | 124.5 | 0.0290 | 1.14 |
| CRCP       | CGRP receptor component(CRCP)                                       | NM_001040648 | 119.4  | 122.8 | 0.0290 | 1.16 |
| SLCO1A2    | solute carrier organic anion transporter family member 1A2(SLCO1A2) | NM_134431    | 325.3  | 184   | 0.0290 | 0.66 |
| FLT4       | fms related tyrosine kinase 4(FLT4)                                 | NM_002020    | 124.4  | 100.7 | 0.0290 | 0.89 |
|            |                                                                     | XM_944907    | 341.4  | 451.1 | 0.0290 | 1.53 |
| SPIN4      | spindlin family member 4(SPIN4)                                     | NM_001012968 | 105.1  | 111   | 0.0290 | 1.17 |

|         |                                                     |              |       |       |        |      |
|---------|-----------------------------------------------------|--------------|-------|-------|--------|------|
| Snord89 | small nucleolar RNA, C/D box 89(SNORD89)            | NR_003070    | 381.2 | 655.7 | 0.0290 | 1.88 |
|         |                                                     | AL110176     | 107.3 | 108.5 | 0.0290 | 1.11 |
|         |                                                     | XM_001715878 | 125.7 | 101.3 | 0.0290 | 0.88 |
| H1FOO   | H1 histone family member O, oocyte specific(H1FOO)  | NM_153833    | 111.7 | 95.5  | 0.0290 | 0.9  |
| PSMC3IP | PSMC3 interacting protein(PSMC3IP)                  | NM_013290    | 118.1 | 96.7  | 0.0290 | 0.87 |
| ARSB    | arylsulfatase B(ARSB)                               | NM_000046    | 124.2 | 102.4 | 0.0290 | 0.9  |
| ARSB    | arylsulfatase B(ARSB)                               | NM_000046    | 149.8 | 126.1 | 0.0290 | 0.9  |
| ARSG    | arylsulfatase G(ARSG)                               | NM_014960    | 195.9 | 145.7 | 0.0290 | 0.84 |
| SNAPIN  | SNAP associated protein(SNAPIN)                     | NM_012437    | 112.2 | 118.8 | 0.0290 | 1.16 |
| HSPA9   | heat shock protein family A (Hsp70) member 9(HSPA9) | NM_004134    | 758.7 | 422.6 | 0.0290 | 0.63 |
| RNVU1-7 | RNA, variant U1 small nuclear 7(RNVU1-7)            | NR_004426    | 156.7 | 187.9 | 0.0290 | 1.35 |

|        |                                                                 |                  |       |       |        |      |
|--------|-----------------------------------------------------------------|------------------|-------|-------|--------|------|
| LCAT   | lecithin-<br>cholesterol<br>acyltransferase(L<br>CAT)           | NM_00022<br>9    | 250   | 312.9 | 0.0290 | 1.44 |
| UBXN7  | UBX domain<br>protein 7(UBXN7)                                  | NM_01556<br>2    | 91.5  | 100.5 | 0.0290 | 1.19 |
| DNAAF5 | dynein axonemal<br>assembly factor<br>5(DNAAF5)                 | NM_01780<br>2    | 88.2  | 107.2 | 0.0290 | 1.33 |
| FAM63B | family with<br>sequence<br>similarity 63<br>member<br>B(FAM63B) | NM_00104<br>0450 | 115.2 | 139.8 | 0.0290 | 1.34 |
|        |                                                                 | XM_93083<br>5    | 202.8 | 145.5 | 0.0290 | 0.82 |
| NR6A1  | nuclear receptor<br>subfamily 6 group<br>A member<br>1(NR6A1)   | NM_00148<br>9    | 109.4 | 93.9  | 0.0290 | 0.9  |
| SNX22  | sorting nexin<br>22(SNX22)                                      | NM_02479<br>8    | 133.3 | 101.7 | 0.0290 | 0.82 |
| STRN3  | striatin 3(STRN3)                                               | NM_01457<br>4    | 311.9 | 385.9 | 0.0290 | 1.39 |
|        |                                                                 | XM_92590<br>1    | 99.2  | 102.1 | 0.0290 | 1.11 |
| ENY2   | ENY2,<br>transcription and<br>export complex 2<br>subunit(ENY2) | NM_02018<br>9    | 972.6 | 641.6 | 0.0290 | 0.73 |



|        |                                                         |              |        |       |        |      |           |       |       |
|--------|---------------------------------------------------------|--------------|--------|-------|--------|------|-----------|-------|-------|
| OR2B2  | olfactory receptor family 2 subfamily B member 2(OR2B2) | NM_033057    | 129.6  | 101.4 | 0.0290 | 0.82 |           |       |       |
| CACTIN | cactin, spliceosome C complex subunit(CACTIN)           | NM_001080543 | 114.2  | 113.2 | 0.0300 | 1.1  |           |       |       |
|        |                                                         | XR_017883    | 222.1  | 139.3 | 0.0300 | 0.72 |           |       |       |
| MED1   | mediator complex subunit 1(MED1)                        | NM_004774    | 146.2  | 158.8 | 0.0300 | 1.22 |           |       |       |
| MED1   | mediator complex subunit 1(MED1)                        | NM_004774    | 251.7  | 199.4 | 0.0300 | 1.22 |           |       |       |
|        |                                                         | XM_933621    | 127.6  | 103.3 | 0.0300 | 0.88 |           |       |       |
| SPC25  | SPC25, NDC80 kinetochore complex component(SPC25)       | NM_020675    | 90.4   | 97.5  | 0.0300 | 1.16 |           |       |       |
| HOXA6  | homeobox A6(HOXA6)                                      | NM_024014    | 472.9  | 282.8 | 0.0300 | 0.7  | NM_145089 | 67.02 | 12.33 |
| ACBD3  | acyl-CoA binding domain containing 3(ACBD3)             | NM_022735    | 286.2  | 184.8 | 0.0300 | 0.72 | NM_013157 | 76.74 | 0.47  |
| MT2A   | metallothionein 2A(MT2A)                                | NM_005953    | 1687.2 | 603.4 | 0.0300 | 0.42 | NM_013157 | 76.74 | 0.47  |

|               |                                                                                                       |                  |       |       |        |      |               |       |      |
|---------------|-------------------------------------------------------------------------------------------------------|------------------|-------|-------|--------|------|---------------|-------|------|
| BVES          | blood vessel<br>epicardial<br>substance(BVES)                                                         | NM_14714<br>7    | 124.8 | 105   | 0.0300 | 0.92 | NM_0131<br>57 | 76.74 | 0.47 |
| FANCG         | Fanconi anemia<br>complementation<br>group G(FANCG)                                                   | NM_00462<br>9    | 133.6 | 164.5 | 0.0300 | 1.38 |               |       |      |
| KRTAP1<br>2-3 | keratin associated<br>protein 12-<br>3(KRTAP12-3)                                                     | NM_19869<br>7    | 104.4 | 106.2 | 0.0300 | 1.11 |               |       |      |
| ZFPM2         | zinc finger protein,<br>FOG family<br>member<br>2(ZFPM2)                                              | NM_01208<br>2    | 94.3  | 105.6 | 0.0300 | 1.22 |               |       |      |
| PTPRB         | protein tyrosine<br>phosphatase,<br>receptor type<br>B(PTPRB)                                         | NM_00283<br>7    | 151.1 | 197.8 | 0.0300 | 1.48 |               |       |      |
| UCKL1         | uridine-cytidine<br>kinase 1 like<br>1(UCKL1)                                                         | NM_01785<br>9    | 413.3 | 491.9 | 0.0300 | 1.36 |               |       |      |
| WHAMM         | WAS protein<br>homolog<br>associated with<br>actin, golgi<br>membranes and<br>microtubules(WH<br>AMM) | NM_00108<br>0435 | 137.2 | 145.8 | 0.0300 | 1.2  |               |       |      |

|          |                                                       |              |       |       |        |      |
|----------|-------------------------------------------------------|--------------|-------|-------|--------|------|
| FAM110B  | family with sequence similarity 110 member B(FAM110B) | NM_147189    | 156.1 | 198.6 | 0.0300 | 1.45 |
|          |                                                       | XM_928195    | 95.5  | 108.2 | 0.0300 | 1.24 |
| BBS2     | Bardet-Biedl syndrome 2(BBS2)                         | NM_031885    | 468.1 | 314.5 | 0.0300 | 0.74 |
| BBS2     | Bardet-Biedl syndrome 2(BBS2)                         | NM_031885    | 712.8 | 548.9 | 0.0300 | 0.74 |
| PSAT1    | phosphoserine aminotransferase 1(PSAT1)               | NM_021154    | 136.1 | 140.6 | 0.0300 | 1.2  |
| BAZ1A    | bromodomain adjacent to zinc finger domain 1A(BAZ1A)  | NM_013448    | 95.7  | 113.1 | 0.0300 | 1.3  |
|          |                                                       | CN304251     | 97.8  | 103.2 | 0.0300 | 1.14 |
| c19orf60 | chromosome 19 open reading frame 60(C19orf60)         | NM_00110419  | 682.4 | 483   | 0.0300 | 0.8  |
| SUMO2    | small ubiquitin-like modifier 2(SUMO2)                | NM_001005849 | 399.9 | 512.5 | 0.0300 | 1.47 |
| SUMO2    | small ubiquitin-like modifier 2(SUMO2)                | NM_001005849 | 697.5 | 875.6 | 0.0300 | 1.47 |

|         |                                                          |                  |       |       |        |      |
|---------|----------------------------------------------------------|------------------|-------|-------|--------|------|
| qsox1   | quiescin<br>sulfhydryl oxidase<br>1(QSOX1)               | NM_00100<br>4128 | 202.9 | 241.6 | 0.0300 | 1.33 |
|         |                                                          | XR_03901<br>7    | 104.9 | 128.7 | 0.0300 | 1.36 |
| HDLBP   | high density<br>lipoprotein<br>binding<br>protein(HDLBP) | NM_20334<br>6    | 132.5 | 102.2 | 0.0300 | 0.84 |
| RNF138  | ring finger protein<br>138(RNF138)                       | NM_01627<br>1    | 107.4 | 91.2  | 0.0300 | 0.88 |
| csnk1g3 | casein kinase 1<br>gamma<br>3(CSNK1G3)                   | NM_00103<br>1812 | 125.5 | 132.2 | 0.0310 | 1.17 |
| C1orf87 | chromosome 1<br>open reading<br>frame 87(C1orf87)        | NM_15237<br>7    | 94.1  | 91.7  | 0.0310 | 1.11 |
| C1orf87 | chromosome 1<br>open reading<br>frame 87(C1orf87)        | NM_15237<br>7    | 104.5 | 105.8 | 0.0310 | 1.11 |
| CRISP2  | cysteine rich<br>secretory protein<br>2(CRISP2)          | NM_00329<br>6    | 558.3 | 262.7 | 0.0310 | 0.56 |
|         |                                                          | AW085986         | 224.5 | 145.6 | 0.0310 | 0.73 |
| ESYT2   | extended<br>synaptotagmin<br>2(ESYT2)                    | NM_02072<br>8    | 135.9 | 99.6  | 0.0310 | 0.79 |

|               |                                                                 |               |       |       |        |      |
|---------------|-----------------------------------------------------------------|---------------|-------|-------|--------|------|
|               |                                                                 | XM_92872<br>2 | 125.3 | 104.5 | 0.0310 | 0.92 |
| LOC284<br>933 | uncharacterized<br>LOC284933(LOC<br>284933)                     | BC048428      | 110.5 | 94.7  | 0.0310 | 0.9  |
| MOK           | MOK protein<br>kinase(MOK)                                      | NM_01422<br>6 | 97.2  | 108   | 0.0310 | 1.21 |
| CDK5R<br>1    | cyclin dependent<br>kinase 5<br>regulatory subunit<br>1(CDK5R1) | NM_00388<br>5 | 81.6  | 95.8  | 0.0310 | 1.26 |
| CDK5R<br>1    | cyclin dependent<br>kinase 5<br>regulatory subunit<br>1(CDK5R1) | NM_00388<br>5 | 145.7 | 154.1 | 0.0310 | 1.26 |
| ACTRT1        | actin related<br>protein<br>T1(ACTRT1)                          | NM_13828<br>9 | 211.4 | 138.1 | 0.0310 | 0.73 |
| SIRT6         | sirtuin 6(SIRT6)                                                | NM_01653<br>9 | 142.2 | 105.3 | 0.0310 | 0.82 |
| C6orf47       | chromosome 6<br>open reading<br>frame 47(C6orf47)               | NM_02118<br>4 | 149.3 | 172.3 | 0.0310 | 1.31 |
| TONSL         | tonsoku-like, DNA<br>repair<br>protein(TONSL)                   | NM_01343<br>2 | 197.9 | 143.4 | 0.0310 | 0.82 |

|         |                                                                      |           |         |         |        |      |           |      |       |
|---------|----------------------------------------------------------------------|-----------|---------|---------|--------|------|-----------|------|-------|
| GDF11   | growth differentiation factor 11(GDF11)                              | AK091091  | 122.1   | 142.5   | 0.0310 | 1.3  |           |      |       |
| CLUAP1  | clusterin associated protein 1(CLUAP1)                               | NM_024793 | 111.7   | 106.1   | 0.0310 | 1.13 |           |      |       |
| CLUAP1  | clusterin associated protein 1(CLUAP1)                               | NM_024793 | 129.3   | 119.1   | 0.0310 | 1.13 |           |      |       |
| CLUAP1  | clusterin associated protein 1(CLUAP1)                               | NM_024793 | 16683.3 | 17456.7 | 0.0310 | 1.13 | NM_134394 | 3.46 | 15.03 |
| NAV3    | neuron navigator 3(NAV3)                                             | NM_014903 | 99.5    | 128.2   | 0.0310 | 1.43 |           |      |       |
| LPP     | LIM domain containing preferred translocation partner in lipoma(LPP) | NM_005578 | 500.5   | 621.5   | 0.0310 | 1.39 |           |      |       |
| C1orf52 | chromosome 1 open reading frame 52(C1orf52)                          | NM_198077 | 251.3   | 309.2   | 0.0310 | 1.37 |           |      |       |
| TAF6    | TATA-box binding protein associated factor 6(TAF6)                   | NM_005641 | 119.5   | 99.8    | 0.0310 | 0.91 |           |      |       |

|         |                                                      |              |       |       |        |      |
|---------|------------------------------------------------------|--------------|-------|-------|--------|------|
| TP53BP2 | tumor protein p53 binding protein 2(TP53BP2)         | NM_001031685 | 104.8 | 106.5 | 0.0310 | 1.12 |
| TSHZ3   | teashirt zinc finger homeobox 3(TSHZ3)               | NM_020856    | 110.8 | 141.1 | 0.0310 | 1.41 |
| PHIP    | pleckstrin homology domain interacting protein(PHIP) | BX537762     | 108.4 | 135.4 | 0.0310 | 1.39 |
|         |                                                      | XR_037871    | 101.6 | 112.9 | 0.0310 | 1.21 |
|         |                                                      | XM_929738    | 318.1 | 390.1 | 0.0310 | 1.36 |
|         |                                                      | XM_001721243 | 92.6  | 98    | 0.0310 | 1.14 |
|         |                                                      | XM_001717548 | 89.2  | 97.8  | 0.0310 | 1.17 |
|         |                                                      | XR_038911    | 114.5 | 91.2  | 0.0310 | 0.86 |
| KMT2C   | lysine methyltransferase 2C(KMT2C)                   | NM_170606    | 133.5 | 147.2 | 0.0320 | 0.8  |
| KMT2C   | lysine methyltransferase 2C(KMT2C)                   | NM_170606    | 156   | 111.9 | 0.0320 | 0.8  |
| TRAP1   | TNF receptor associated protein 1(TRAP1)             | NM_016292    | 127.9 | 104   | 0.0320 | 0.89 |

|        |                                        |           |       |       |        |      |
|--------|----------------------------------------|-----------|-------|-------|--------|------|
| AIM1L  | absent in melanoma 1-like(AIM1L)       | NM_017977 | 125.2 | 101.7 | 0.0320 | 0.89 |
| NRCAM  | neuronal cell adhesion molecule(NRCAM) | NM_005010 | 107.2 | 117.5 | 0.0320 | 1.2  |
| NRCAM  | neuronal cell adhesion molecule(NRCAM) | NM_005010 | 145.4 | 187.6 | 0.0320 | 1.2  |
|        |                                        | XR_017484 | 292   | 115.3 | 0.0320 | 0.46 |
| TUBB2B | tubulin beta 2B class IIb(TUBB2B)      | NM_178012 | 100.2 | 116.1 | 0.0320 | 1.28 |
| SEPT1  | septin 1(SEPT1)                        | NM_052838 | 82.4  | 99.8  | 0.0320 | 1.3  |
| MED16  | mediator complex subunit 16(MED16)     | NM_005481 | 111.7 | 111.1 | 0.0320 | 1.11 |
| MED16  | mediator complex subunit 16(MED16)     | NM_005481 | 128.8 | 116.1 | 0.0320 | 1.11 |
| OSBP2  | oxysterol binding protein 2(OSBP2)     | NM_030758 | 117.1 | 121.8 | 0.0320 | 1.17 |
| SP140  | SP140 nuclear body protein(SP140)      | NM_007237 | 193.9 | 125.1 | 0.0320 | 0.73 |



|        |                                                     |           |       |       |        |      |
|--------|-----------------------------------------------------|-----------|-------|-------|--------|------|
| ACADVL | acyl-CoA dehydrogenase, very long chain(ACADVL)     | NM_000018 | 443.6 | 256.4 | 0.0320 | 0.67 |
| USP3   | ubiquitin specific peptidase 3(USP3)                | NM_006537 | 116.8 | 95.9  | 0.0320 | 0.88 |
|        |                                                     | XR_038054 | 316.2 | 119.3 | 0.0320 | 0.44 |
|        |                                                     | XM_941155 | 557.1 | 931   | 0.0320 | 1.94 |
|        |                                                     | XM_941155 | 4625  | 5065  | 0.0320 | 1.94 |
| USF1   | upstream transcription factor 1(USF1)               | NM_207005 | 146.7 | 215.1 | 0.0320 | 1.61 |
| FAM78A | family with sequence similarity 78 member A(FAM78A) | NM_033387 | 124.2 | 97.4  | 0.0320 | 0.84 |
|        |                                                     | XM_938838 | 191.4 | 135.8 | 0.0320 | 0.81 |
|        |                                                     | XR_037962 | 112.9 | 120.3 | 0.0320 | 1.17 |
| TLE4   | transducin like enhancer of split 4(TLE4)           | NM_007005 | 103.7 | 114.3 | 0.0320 | 1.2  |
| TLE4   | transducin like enhancer of split 4(TLE4)           | NM_007005 | 153.9 | 211.2 | 0.0320 | 1.2  |

|              |                                                           |              |        |        |        |      |
|--------------|-----------------------------------------------------------|--------------|--------|--------|--------|------|
|              |                                                           | AA883754     | 111.4  | 93     | 0.0320 | 0.88 |
|              |                                                           | XR_019076    | 93.7   | 96     | 0.0320 | 1.1  |
| ENPP6        | ectonucleotide pyrophosphatase/phosphodiesterase 6(ENPP6) | NM_153343    | 106.5  | 87.9   | 0.0320 | 0.87 |
| RPL6         | ribosomal protein L6(RPL6)                                | NM_001024662 | 114.1  | 131.7  | 0.0320 | 1.32 |
| RPL6         | ribosomal protein L6(RPL6)                                | NM_001024662 | 1707.2 | 1910.7 | 0.0320 | 1.32 |
| RPL6         | ribosomal protein L6(RPL6)                                | NM_001024662 | 2873.7 | 3047.8 | 0.0320 | 1.32 |
|              |                                                           | AW593356     | 116.2  | 96.3   | 0.0320 | 0.88 |
| DNASE1L1     | deoxyribonuclease 1 like 1(DNASE1L1)                      | NM_006730    | 107.8  | 110.5  | 0.0320 | 1.12 |
| LOC100190986 | uncharacterized LOC100190986(LOC100190986)                | NR_024456    | 118.9  | 97.7   | 0.0320 | 0.9  |
| ZNF606       | zinc finger protein 606(ZNF606)                           | NM_025027    | 121.2  | 125    | 0.0320 | 1.13 |
|              |                                                           | XM_940806    | 112.5  | 93.1   | 0.0320 | 0.88 |
| ACD          | adrenocortical dysplasia homolog(ACD)                     | NM_022914    | 145.9  | 145.9  | 0.0330 | 1.13 |
| CEBPZ        | CCAAT/enhancer binding protein zeta(CEBPZ)                | NM_005760    | 424.8  | 463.6  | 0.0330 | 1.23 |

|        |                                                             |              |       |       |        |      |
|--------|-------------------------------------------------------------|--------------|-------|-------|--------|------|
| CPM    | carboxypeptidase M(CPM)                                     | NM_001005502 | 104.8 | 108.6 | 0.0330 | 1.15 |
| CPM    | carboxypeptidase M(CPM)                                     | NM_001005502 | 109.2 | 102.9 | 0.0330 | 1.15 |
| HAT1   | histone acetyltransferase 1(HAT1)                           | NM_003642    | 134.1 | 121.8 | 0.0330 | 1.24 |
| HAT1   | histone acetyltransferase 1(HAT1)                           | NM_003642    | 172.6 | 188.1 | 0.0330 | 1.24 |
| TINF2  | TERF1 interacting nuclear factor 2(TINF2)                   | NM_012461    | 152.6 | 157.5 | 0.0330 | 1.18 |
| MFHAS1 | malignant fibrous histiocytoma amplified sequence 1(MFHAS1) | NM_004225    | 137.7 | 174.5 | 0.0330 | 1.38 |
| ETNK2  | ethanolamine kinase 2(ETNK2)                                | NM_018208    | 218.3 | 134.7 | 0.0330 | 0.69 |
| PDPK1  | 3-phosphoinositide dependent protein kinase 1(PDPK1)        | NM_031268    | 105.6 | 89.3  | 0.0330 | 0.9  |
| PDPK1  | 3-phosphoinositide dependent protein kinase 1(PDPK1)        | NM_031268    | 472.1 | 387.7 | 0.0330 | 0.9  |

|          |                                                                         |              |       |       |        |      |
|----------|-------------------------------------------------------------------------|--------------|-------|-------|--------|------|
| slx4ip   | SLX4 interacting protein(SLX4IP)                                        | NM_001009608 | 112.8 | 113.6 | 0.0330 | 1.11 |
| pnkd     | paroxysmal nonkinesigenic dyskinesia(PNKD)                              | NM_022572    | 158.3 | 119.9 | 0.0330 | 0.84 |
| pnkd     | paroxysmal nonkinesigenic dyskinesia(PNKD)                              | NM_022572    | 163.9 | 136.1 | 0.0330 | 0.84 |
| TMEM80   | transmembrane protein 80(TMEM80)                                        | NM_174940    | 206.1 | 135.9 | 0.0330 | 0.76 |
| BUB1     | BUB1 mitotic checkpoint serine/threonine kinase(BUB1)                   | NM_004336    | 80.2  | 101.5 | 0.0330 | 1.38 |
| CACNA2D4 | calcium voltage-gated channel auxiliary subunit alpha2delta 4(CACNA2D4) | NM_001005737 | 123   | 102.4 | 0.0330 | 0.91 |
| CASP10   | caspase 10(CASP10)                                                      | NM_001230    | 91.1  | 99.1  | 0.0330 | 1.15 |
|          |                                                                         | BX117604     | 117.2 | 96.6  | 0.0330 | 0.86 |
| RAB27B   | RAB27B, member RAS oncogene family(RAB27B)                              | AF131784     | 127.3 | 147.8 | 0.0330 | 1.31 |
|          |                                                                         | XR_015468    | 108.4 | 89.4  | 0.0330 | 0.85 |

|        |                                                              |              |       |       |        |      |
|--------|--------------------------------------------------------------|--------------|-------|-------|--------|------|
| TMIGD1 | transmembrane and immunoglobulin domain containing 1(TMIGD1) | NM_206832    | 133.2 | 94.7  | 0.0330 | 0.76 |
| SOCS4  | suppressor of cytokine signaling 4(SOCS4)                    | NM_199421    | 102.4 | 117.8 | 0.0330 | 1.29 |
| LCA5L  | LCA5L, lebercilin like(LCA5L)                                | NM_152505    | 131.2 | 104.9 | 0.0330 | 0.88 |
| SPTBN4 | spectrin beta, non-erythrocytic 4(SPTBN4)                    | NM_020971    | 110   | 92.4  | 0.0330 | 0.86 |
| ZBTB16 | zinc finger and BTB domain containing 16(ZBTB16)             | NM_006006    | 90.5  | 107.4 | 0.0330 | 1.28 |
| ZBTB16 | zinc finger and BTB domain containing 16(ZBTB16)             | NM_006006    | 172.1 | 263   | 0.0330 | 1.28 |
| NRSN2  | neurensin 2(NRSN2)                                           | NM_024958    | 196.8 | 140.5 | 0.0330 | 0.81 |
| VNN2   | vanin 2(VNN2)                                                | NM_004665    | 103.2 | 108   | 0.0330 | 1.17 |
| STRN   | striatin(STRN)                                               | NM_003162    | 160   | 118.2 | 0.0330 | 0.83 |
|        |                                                              | XM_001716173 | 134.1 | 99.2  | 0.0330 | 0.77 |

|        |                                               |           |       |       |        |      |              |             |
|--------|-----------------------------------------------|-----------|-------|-------|--------|------|--------------|-------------|
| FHIT   | fragile histidine triad(FHIT)                 | NM_002012 | 111.6 | 94.4  | 0.0330 | 0.89 |              |             |
| SHISA4 | shisa family member 4(SHISA4)                 | NM_198149 | 106.5 | 91.8  | 0.0340 | 0.91 |              |             |
| TSPYL4 | TSPY like 4(TSPYL4)                           | NM_021648 | 145.1 | 109.3 | 0.0340 | 0.83 |              |             |
| APOOL  | apolipoprotein O like(APOOL)                  | NM_198450 | 189.3 | 206.1 | 0.0340 | 1.24 |              |             |
| HDGF   | hepatoma-derived growth factor(HDGF)          | NM_004494 | 358.3 | 234.1 | 0.0340 | 0.77 |              |             |
| CALHM2 | calcium homeostasis modulator 2(CALHM2)       | NM_015916 | 100.3 | 105.4 | 0.0340 | 1.13 |              |             |
| LRR1   | leucine rich repeat protein 1(LRR1)           | NM_203467 | 92.4  | 110.1 | 0.0340 | 1.3  |              |             |
| FANCE  | Fanconi anemia complementation group E(FANCE) | NM_021922 | 162.8 | 217.7 | 0.0340 | 1.53 |              |             |
|        |                                               | XR_015615 | 170.5 | 108.4 | 0.0340 | 0.71 |              |             |
| TLR10  | toll like receptor 10(TLR10)                  | NM_030956 | 95.8  | 118.8 | 0.0340 | 1.36 |              |             |
| TLR8   | toll like receptor 8(TLR8)                    | NM_016610 | 91    | 110.7 | 0.0340 | 1.33 |              |             |
| WDR73  | WD repeat domain 73(WDR73)                    | NM_032856 | 114.2 | 130.2 | 0.0340 | 1.23 | NM_001011972 | 5.50 125.06 |

|        |                                                              |              |       |       |        |      |              |       |        |
|--------|--------------------------------------------------------------|--------------|-------|-------|--------|------|--------------|-------|--------|
|        |                                                              | XM_944290    | 333.5 | 163.5 | 0.0340 | 0.57 |              |       |        |
| CKAP2L | cytoskeleton associated protein 2 like(CKAP2L)               | NM_152515    | 104.3 | 115   | 0.0340 | 1.21 |              |       |        |
| QRICH1 | glutamine rich 1(QRICH1)                                     | NM_017730    | 156.8 | 180.2 | 0.0340 | 1.3  |              |       |        |
| PCDH17 | protocadherin 17(PCDH17)                                     | NM_014459    | 158.6 | 577.3 | 0.0340 | 3.92 |              |       |        |
|        |                                                              | BU561024     | 124.9 | 102.1 | 0.0340 | 0.87 | NM_001107867 | 13.22 | 158.63 |
| CLCF1  | cardiotrophin-like cytokine factor 1(CLCF1)                  | NM_013246    | 212.3 | 141.9 | 0.0340 | 0.75 |              |       |        |
| SYNE1  | spectrin repeat containing nuclear envelope protein 1(SYNE1) | NM_033071    | 123.7 | 86.7  | 0.0340 | 0.75 |              |       |        |
| CLOCK  | clock circadian regulator(CLOCK)                             | NM_004898    | 267.2 | 163.1 | 0.0340 | 0.71 |              |       |        |
| PRKDC  | protein kinase, DNA-activated, catalytic polypeptide(PRKDC)  | NM_001081640 | 485.4 | 581.2 | 0.0340 | 1.38 | NM_001014199 | 0.43  | 104.20 |
| TUBB4A | tubulin beta 4A class IVa(TUBB4A)                            | NM_006087    | 171.7 | 128.1 | 0.0340 | 0.84 |              |       |        |

|             |                                                                                    |                  |       |       |        |      |                  |        |        |
|-------------|------------------------------------------------------------------------------------|------------------|-------|-------|--------|------|------------------|--------|--------|
| POM121<br>C | POM121<br>transmembrane<br>nucleoporin<br>C(POM121C)                               | NM_00109<br>9415 | 111.7 | 119.3 | 0.0340 | 1.19 | NM_1987<br>45    | 128.13 | 517.66 |
| DUS3L       | dihydrouridine<br>synthase 3<br>like(DUS3L)                                        | NM_02017<br>5    | 137   | 153.6 | 0.0340 | 1.26 | NM_1987<br>45    | 128.13 | 517.66 |
|             |                                                                                    | XM_92746<br>8    | 104.4 | 106   | 0.0340 | 1.1  |                  |        |        |
|             |                                                                                    | XM_49605<br>4    | 95.6  | 101.7 | 0.0340 | 1.14 |                  |        |        |
| TTPAL       | alpha tocopherol<br>transfer protein<br>like(TTPAL)                                | NM_02433<br>1    | 138.7 | 154.6 | 0.0340 | 1.27 |                  |        |        |
|             |                                                                                    | CK299443         | 149.4 | 117.2 | 0.0340 | 0.88 | NM_0011<br>05991 | 1.24   | 549.69 |
| CCT8L1<br>P | chaperonin<br>containing TCP1<br>subunit 8 like 1,<br>pseudogene(CCT<br>8L1P)      | NM_00102<br>9866 | 104.4 | 105.4 | 0.0340 | 1.1  | NM_0011<br>05991 | 1.24   | 549.69 |
| RBM10       | RNA binding motif<br>protein<br>10(RBM10)                                          | NM_15285<br>6    | 283.8 | 311.5 | 0.0350 | 1.25 | NM_0010<br>13929 | 4.59   | 30.85  |
| YIF1B       | Yip1 interacting<br>factor homolog B,<br>membrane<br>trafficking<br>protein(YIF1B) | NM_03355<br>7    | 106.6 | 107.7 | 0.0350 | 1.11 | NM_0010<br>13929 | 4.59   | 30.85  |
|             |                                                                                    | XM_00172<br>3141 | 695.1 | 854.9 | 0.0350 | 1.35 |                  |        |        |



|              |                                                                    |                  |       |       |        |      |
|--------------|--------------------------------------------------------------------|------------------|-------|-------|--------|------|
|              |                                                                    | XR_03790<br>8    | 112.4 | 93.7  | 0.0350 | 0.89 |
| PCDHG<br>C4  | protocadherin<br>gamma subfamily<br>C, 4(PCDHGC4)                  | NM_03240<br>6    | 120.7 | 98.4  | 0.0350 | 0.88 |
| KLHL36       | kelch like family<br>member<br>36(KLHL36)                          | NM_02473<br>1    | 151.1 | 120.3 | 0.0350 | 0.87 |
|              |                                                                    | XM_00113<br>0428 | 130.9 | 105.5 | 0.0350 | 0.89 |
| TAGLN        | transgelin(TAGLN<br>)                                              | NM_00100<br>1522 | 126.5 | 104.2 | 0.0350 | 0.89 |
| C15orf5<br>6 | chromosome 15<br>open reading<br>frame<br>56(C15orf56)             | NM_00103<br>9905 | 118.4 | 97.5  | 0.0350 | 0.89 |
| RBMXL<br>2   | RNA binding motif<br>protein, X-linked<br>like 2(RBMXL2)           | NM_01446<br>9    | 106.8 | 88.7  | 0.0350 | 0.87 |
| SEC31A       | SEC31 homolog<br>A, COPII coat<br>complex<br>component(SEC3<br>1A) | NM_01493<br>3    | 115.5 | 110.1 | 0.0350 | 1.37 |
| SEC31A       | SEC31 homolog<br>A, COPII coat<br>complex<br>component(SEC3<br>1A) | NM_01493<br>3    | 207.9 | 230.8 | 0.0350 | 1.37 |

|              |                                                                     |                  |       |       |        |      |
|--------------|---------------------------------------------------------------------|------------------|-------|-------|--------|------|
| SEC31A       | SEC31 homolog<br>A, COPII coat<br>complex<br>component(SEC3<br>1A)  | NM_01493<br>3    | 462.7 | 564.9 | 0.0350 | 1.37 |
| MYCBP<br>2   | MYC binding<br>protein 2, E3<br>ubiquitin protein<br>ligase(MYCBP2) | NM_01505<br>7    | 224.3 | 362.9 | 0.0350 | 1.82 |
| GSTA3        | glutathione S-<br>transferase alpha<br>3(GSTA3)                     | NM_00084<br>7    | 89    | 95.1  | 0.0350 | 1.15 |
|              |                                                                     | AI627272         | 113   | 113.4 | 0.0350 | 1.11 |
|              |                                                                     | BX092585         | 112.7 | 94.3  | 0.0350 | 0.87 |
| SCFD2        | sec1 family<br>domain<br>containing<br>2(SCFD2)                     | NM_15254<br>0    | 105.5 | 117.9 | 0.0350 | 1.22 |
| CD27-<br>AS1 | CD27 antisense<br>RNA 1(CD27-<br>AS1)                               | NR_01538<br>2    | 107.9 | 116.6 | 0.0350 | 1.18 |
| ATRX         | ATRX, chromatin<br>remodeler(ATRX)                                  | NM_00048<br>9    | 102.8 | 113   | 0.0350 | 1.2  |
| RWDD1        | RWD domain<br>containing<br>1(RWDD1)                                | NM_00100<br>7464 | 605   | 699.3 | 0.0350 | 1.29 |
|              |                                                                     | XM_93055<br>8    | 131   | 104.6 | 0.0350 | 0.88 |
| AOAH         | acyloxyacyl<br>hydrolase(AOAH)                                      | NM_00163<br>7    | 87.8  | 95.9  | 0.0350 | 1.16 |

|        |                                                     |              |       |       |        |      |
|--------|-----------------------------------------------------|--------------|-------|-------|--------|------|
| SRPK2  | SRSF protein kinase 2(SRPK2)                        | NM_182692    | 105.6 | 109.9 | 0.0350 | 1.14 |
| CTDP1  | CTD phosphatase subunit 1(CTDP1)                    | NM_004715    | 103.6 | 101.4 | 0.0350 | 0.86 |
| CTDP1  | CTD phosphatase subunit 1(CTDP1)                    | NM_004715    | 122   | 96.1  | 0.0350 | 0.86 |
|        |                                                     | XM_941100    | 95    | 109.4 | 0.0350 | 1.26 |
| NOTUM  | NOTUM, palmitoleoyl-protein carboxylesterase(NOTUM) | NM_178493    | 112.2 | 96.9  | 0.0360 | 0.92 |
| DTD2   | D-tyrosyl-tRNA deacylase 2 (putative)(DTD2)         | NM_080664    | 105.6 | 111.8 | 0.0360 | 1.16 |
| USP33  | ubiquitin specific peptidase 33(USP33)              | NM_201624    | 95.5  | 100.8 | 0.0360 | 1.13 |
|        |                                                     | BX641358     | 100.2 | 104   | 0.0360 | 1.13 |
|        |                                                     | XM_001720809 | 113.1 | 91.1  | 0.0360 | 0.85 |
| DUSP23 | dual specificity phosphatase 23(DUSP23)             | NM_017823    | 361.1 | 247.6 | 0.0360 | 0.77 |

|           |                                                                  |              |       |       |        |      |
|-----------|------------------------------------------------------------------|--------------|-------|-------|--------|------|
| RITA1     | RBPJ interacting and tubulin associated 1(RITA1)                 | NM_032848    | 157.2 | 120.9 | 0.0360 | 0.85 |
| LOC613206 | myeloproliferative disease associated tumor antigen 5(LOC613206) | NM_001033016 | 113.9 | 92.9  | 0.0360 | 0.87 |
| DLGAP4    | DLG associated protein 4(DLGAP4)                                 | NM_001042486 | 176.7 | 189.6 | 0.0360 | 1.21 |
| TRIM47    | tripartite motif containing 47(TRIM47)                           | NM_033452    | 104.5 | 105.6 | 0.0360 | 1.1  |
| SELENOS   | selenoprotein S(SELENOS)                                         | NM_018445    | 167.6 | 206.1 | 0.0360 | 1.38 |
| SELENOS   | selenoprotein S(SELENOS)                                         | NM_018445    | 911.9 | 899.4 | 0.0360 | 1.38 |
| UGT1A6    | UDP glucuronosyltransferase family 1 member A6(UGT1A6)           | NM_001072    | 146.1 | 107.1 | 0.0360 | 0.69 |
| UGT1A6    | UDP glucuronosyltransferase family 1 member A6(UGT1A6)           | NM_001072    | 161.1 | 106.8 | 0.0360 | 0.69 |

|          |                                                         |           |       |       |        |      |           |             |
|----------|---------------------------------------------------------|-----------|-------|-------|--------|------|-----------|-------------|
| AP1B1    | adaptor related protein complex 1 beta 1 subunit(AP1B1) | NM_145730 | 192.3 | 242.6 | 0.0360 | 1.43 |           |             |
| METTL21B | methyltransferase like 21B(METTL21B)                    | NM_015433 | 698.4 | 358.2 | 0.0360 | 0.57 |           |             |
| MIR561   | microRNA 561(MIR561)                                    | NR_030287 | 104   | 108.4 | 0.0360 | 1.15 |           |             |
|          |                                                         | BQ028043  | 119.2 | 98    | 0.0360 | 0.87 |           |             |
|          |                                                         | BQ021435  | 121.2 | 100.1 | 0.0360 | 0.89 | NM_019136 | 6.29 354.89 |
|          |                                                         | XM_944418 | 93.7  | 100   | 0.0360 | 1.15 |           |             |
| KIF20A   | kinesin family member 20A(KIF20A)                       | NM_005733 | 95.5  | 103.7 | 0.0360 | 1.17 |           |             |
| ASB3     | ankyrin repeat and SOCS box containing 3(ASB3)          | NM_145863 | 100.7 | 106.7 | 0.0360 | 1.15 |           |             |
| AAED1    | AhpC/TSA antioxidant enzyme domain containing 1(AAED1)  | NM_153698 | 124.3 | 134.3 | 0.0360 | 1.21 |           |             |
| CLEC2D   | C-type lectin domain family 2 member D(CLEC2D)          | NM_013269 | 118   | 102   | 0.0360 | 1.3  |           |             |

|         |                                                         |              |        |        |        |      |
|---------|---------------------------------------------------------|--------------|--------|--------|--------|------|
| CLEC2D  | C-type lectin domain family 2 member D(CLEC2D)          | NM_013269    | 2236.2 | 2836.9 | 0.0360 | 1.3  |
|         |                                                         | XM_938002    | 100.5  | 105.8  | 0.0360 | 1.12 |
| NKRF    | NFKB repressing factor(NKRF)                            | NM_017544    | 132.2  | 141    | 0.0360 | 1.2  |
| FAM3D   | family with sequence similarity 3 member D(FAM3D)       | NM_138805    | 125.4  | 98.5   | 0.0360 | 0.87 |
| FAM162B | family with sequence similarity 162 member B(FAM162B)   | NM_001085480 | 107.3  | 114.9  | 0.0360 | 1.19 |
| C8orf82 | chromosome 8 open reading frame 82(C8orf82)             | NM_001001795 | 107.7  | 107.7  | 0.0360 | 1.1  |
| OR5P3   | olfactory receptor family 5 subfamily P member 3(OR5P3) | NM_153445    | 127.9  | 106.9  | 0.0360 | 0.91 |
| STOX2   | storkhead box 2(STOX2)                                  | NM_020225    | 141.9  | 197.9  | 0.0360 | 1.58 |
|         |                                                         | CR748464     | 97.2   | 100    | 0.0370 | 1.11 |
|         |                                                         | XM_001125808 | 124.7  | 134    | 0.0370 | 1.19 |

|             |                                             |                  |       |       |        |      |
|-------------|---------------------------------------------|------------------|-------|-------|--------|------|
| DDX39B      | DExD-box<br>helicase<br>39B(DDX39B)         | NM_08059<br>8    | 770.4 | 967   | 0.0370 | 1.42 |
| ITGB4       | integrin subunit<br>beta 4(ITGB4)           | NM_00100<br>5619 | 103.6 | 97.8  | 0.0370 | 1.12 |
| ITGB4       | integrin subunit<br>beta 4(ITGB4)           | NM_00100<br>5619 | 105.4 | 108.2 | 0.0370 | 1.12 |
| TBX3        | T-box 3(TBX3)                               | NM_00599<br>6    | 111.7 | 114.8 | 0.0370 | 1.13 |
| KLC4        | kinesin light chain<br>4(KLC4)              | NM_20152<br>1    | 107.2 | 87.8  | 0.0370 | 0.87 |
| DNMT3<br>A  | DNA<br>methyltransferase<br>3 alpha(DNMT3A) | NM_17563<br>0    | 94.8  | 100.2 | 0.0370 | 1.15 |
|             |                                             | AA383317         | 114.3 | 95.5  | 0.0370 | 0.89 |
|             |                                             | XM_00171<br>7251 | 88.9  | 98.2  | 0.0370 | 1.18 |
|             |                                             | XM_92892<br>3    | 233.6 | 146.9 | 0.0370 | 0.72 |
| HEATR4      | HEAT repeat<br>containing<br>4(HEATR4)      | NM_20330<br>9    | 115.3 | 95.7  | 0.0370 | 0.89 |
| MEF2C       | myocyte enhancer<br>factor 2C(MEF2C)        | NM_00239<br>7    | 107.2 | 199.8 | 0.0370 | 2.08 |
| ZNF75A      | zinc finger protein<br>75a(ZNF75A)          | NM_15302<br>8    | 97.5  | 103   | 0.0370 | 1.14 |
| ANKRD<br>49 | ankyrin repeat<br>domain<br>49(ANKRD49)     | NM_01770<br>4    | 168.1 | 179.1 | 0.0370 | 1.19 |

|         |                                                   |              |       |       |        |      |
|---------|---------------------------------------------------|--------------|-------|-------|--------|------|
| TOX4    | TOX high mobility group box family member 4(TOX4) | NM_014828    | 104.8 | 109.5 | 0.0370 | 1.13 |
| COL11A1 | collagen type XI alpha 1 chain(COL11A1)           | NM_080629    | 129.7 | 96.4  | 0.0370 | 0.82 |
| CNST    | consortin, connexin sorting protein(CNST)         | NM_152609    | 259.4 | 427.8 | 0.0370 | 1.86 |
|         |                                                   | XM_940361    | 103.5 | 106.4 | 0.0370 | 1.13 |
| PLEC    | plectin(PLEC)                                     | NM_201380    | 130.1 | 102.7 | 0.0370 | 0.87 |
| GLIPR2  | GLI pathogenesis related 2(GLIPR2)                | NM_022343    | 99.5  | 115.4 | 0.0380 | 1.29 |
| DEFB123 | defensin beta 123(DEFB123)                        | NM_153324    | 395   | 184.7 | 0.0380 | 0.55 |
|         |                                                   | XM_938495    | 132.5 | 106.1 | 0.0380 | 0.87 |
| OGDH    | oxoglutarate dehydrogenase(OGDH)                  | NM_001003941 | 98.9  | 103.2 | 0.0380 | 1.12 |
| BPNT1   | 3'(2'), 5'-bisphosphate nucleotidase 1(BPNT1)     | NM_006085    | 116.7 | 128.3 | 0.0380 | 1.2  |



|             |                                                                              |                  |       |       |        |      |
|-------------|------------------------------------------------------------------------------|------------------|-------|-------|--------|------|
| CTR9        | CTR9 homolog,<br>Paf1/RNA<br>polymerase II<br>complex<br>component(CTR9<br>) | NM_01463<br>3    | 118   | 94.8  | 0.0380 | 0.87 |
| RANBP<br>17 | RAN binding<br>protein<br>17(RANBP17)                                        | NM_02289<br>7    | 164.1 | 119.8 | 0.0380 | 0.78 |
| U2AF2       | U2 small nuclear<br>RNA auxiliary<br>factor 2(U2AF2)                         | NM_00727<br>9    | 103.3 | 109.6 | 0.0380 | 1.16 |
| U2AF2       | U2 small nuclear<br>RNA auxiliary<br>factor 2(U2AF2)                         | NM_00727<br>9    | 663.9 | 593.8 | 0.0380 | 1.16 |
|             |                                                                              | XM_94103<br>5    | 116.1 | 94    | 0.0380 | 0.88 |
|             |                                                                              | XM_00172<br>4530 | 116.3 | 97.3  | 0.0380 | 0.9  |
| SNORD<br>56 | small nucleolar<br>RNA, C/D box<br>56(SNORD56)                               | NR_00273<br>9    | 105.8 | 120.7 | 0.0380 | 1.26 |
| RPL13       | ribosomal protein<br>L13(RPL13)                                              | NM_03325<br>1    | 110.1 | 124.2 | 0.0380 | 1.25 |
| HYDIN       | HYDIN, axonemal<br>central pair<br>apparatus<br>protein(HYDIN)               | NM_03282<br>1    | 103   | 98.1  | 0.0380 | 0.89 |

|          |                                                       |              |        |       |        |      |
|----------|-------------------------------------------------------|--------------|--------|-------|--------|------|
| HYDIN    | HYDIN, axonemal central pair apparatus protein(HYDIN) | NM_032821    | 112.7  | 94.6  | 0.0380 | 0.89 |
| HYDIN    | HYDIN, axonemal central pair apparatus protein(HYDIN) | NM_032821    | 137.8  | 117.2 | 0.0380 | 0.89 |
| HYDIN    | HYDIN, axonemal central pair apparatus protein(HYDIN) | NM_032821    | 150.8  | 123.4 | 0.0380 | 0.89 |
| DSP      | desmoplakin(DSP)                                      | NM_001008844 | 183.9  | 173.5 | 0.0380 | 0.8  |
| DSP      | desmoplakin(DSP)                                      | NM_001008844 | 190.6  | 134.1 | 0.0380 | 0.8  |
| EIF6     | eukaryotic translation initiation factor 6(EIF6)      | NM_181469    | 1332.8 | 937.9 | 0.0380 | 0.79 |
| BCAP29   | B-cell receptor associated protein 29(BCAP29)         | NM_001008405 | 178.4  | 216.6 | 0.0380 | 1.33 |
| RABGGTA  | Rab geranylgeranyltransferase alpha subunit(RABGGTA)  | NM_004581    | 99.8   | 104.8 | 0.0380 | 1.14 |
| KIAA1191 | KIAA1191(KIAA1191)                                    | NM_001079685 | 109.4  | 91.3  | 0.0380 | 0.88 |

|           |                                                       |           |        |        |        |      |           |            |
|-----------|-------------------------------------------------------|-----------|--------|--------|--------|------|-----------|------------|
| DECR1     | 2,4-dienoyl-CoA reductase 1, mitochondrial(DECR1)     | NM_001359 | 1053.4 | 548    | 0.0380 | 0.6  |           |            |
| LGALS2    | galectin 2(LGALS2)                                    | NM_006498 | 1166.8 | 439.6  | 0.0380 | 0.41 |           |            |
| bag4      | BCL2 associated athanogene 4(BAG4)                    | NM_004874 | 143.4  | 152.1  | 0.0390 | 1.19 | NM_139082 | 11.11 0.48 |
| RACK1     | receptor for activated C kinase 1(RACK1)              | NM_006098 | 1619.3 | 1944.8 | 0.0390 | 1.3  |           |            |
| ACBD5     | acyl-CoA binding domain containing 5(ACBD5)           | NM_145698 | 106.6  | 107.3  | 0.0390 | 1.11 |           |            |
| TEDDM1    | transmembrane epididymal protein 1(TEDDM1)            | NM_172000 | 188.6  | 132.9  | 0.0390 | 0.81 |           |            |
| HAND1     | heart and neural crest derivatives expressed 1(HAND1) | NM_004821 | 92.7   | 98     | 0.0390 | 1.13 |           |            |
| ASB16-AS1 | ASB16 antisense RNA 1(ASB16-AS1)                      | NM_178542 | 153    | 115.6  | 0.0390 | 0.84 |           |            |
| CDC14A    | cell division cycle 14A(CDC14A)                       | NM_003672 | 124    | 128    | 0.0390 | 1.14 |           |            |

|        |                                                                 |              |       |       |        |      |
|--------|-----------------------------------------------------------------|--------------|-------|-------|--------|------|
| GDAP2  | ganglioside induced differentiation associated protein 2(GDAP2) | NM_017686    | 193   | 201   | 0.0390 | 1.19 |
|        |                                                                 | CD516455     | 117   | 97.1  | 0.0390 | 0.89 |
| ZDHHC4 | zinc finger DHHC-type containing 4(ZDHHC4)                      | NM_018106    | 200.7 | 149   | 0.0390 | 0.83 |
| EEF2   | eukaryotic translation elongation factor 2(EEF2)                | NM_001961    | 172.4 | 112.2 | 0.0390 | 0.74 |
| CER1   | cerberus 1, DAN family BMP antagonist(CER1)                     | NM_005454    | 147.2 | 114.8 | 0.0390 | 0.86 |
|        |                                                                 | BF054947     | 116.6 | 99.1  | 0.0390 | 0.92 |
|        |                                                                 | XR_015400    | 208.9 | 238.3 | 0.0390 | 1.29 |
| TMEM8B | transmembrane protein 8B(TMEM8B)                                | NM_016446    | 98.6  | 102.4 | 0.0390 | 1.13 |
|        |                                                                 | NM_001009937 | 171.7 | 127.3 | 0.0390 | 0.82 |
|        |                                                                 | XM_001715992 | 147.3 | 111.7 | 0.0390 | 0.86 |
| RYK    | receptor-like tyrosine kinase(RYK)                              | NM_001005861 | 121.1 | 109.5 | 0.0390 | 1.37 |

|        |                                                                       |              |       |       |        |      |
|--------|-----------------------------------------------------------------------|--------------|-------|-------|--------|------|
| RYK    | receptor-like tyrosine kinase(RYK)                                    | NM_001005861 | 217.5 | 269   | 0.0390 | 1.37 |
| ZNF607 | zinc finger protein 607(ZNF607)                                       | NM_032689    | 97.8  | 107   | 0.0390 | 1.19 |
| ZNF607 | zinc finger protein 607(ZNF607)                                       | NM_032689    | 101.9 | 92.3  | 0.0390 | 1.19 |
|        |                                                                       | XM_931025    | 118.9 | 123.8 | 0.0390 | 1.17 |
| RNF181 | ring finger protein 181(RNF181)                                       | NM_016494    | 550.9 | 360.6 | 0.0390 | 0.74 |
| adck5  | aarF domain containing kinase 5(ADCK5)                                | NM_174922    | 139.7 | 146.4 | 0.0390 | 1.16 |
|        |                                                                       | XM_933681    | 143.3 | 111.4 | 0.0390 | 0.85 |
|        |                                                                       | XR_039005    | 156.7 | 110.3 | 0.0390 | 0.78 |
| DYRK1B | dual specificity tyrosine phosphorylation regulated kinase 1B(DYRK1B) | NM_006484    | 177.2 | 130.8 | 0.0390 | 0.82 |
| HELQ   | helicase, POLQ-like(HELQ)                                             | NM_133636    | 164.1 | 191.9 | 0.0390 | 1.3  |
| SYT7   | synaptotagmin 7(SYT7)                                                 | NM_004200    | 117.2 | 139.6 | 0.0390 | 1.35 |
|        |                                                                       | XM_942604    | 98.7  | 102.3 | 0.0390 | 1.12 |
|        |                                                                       | XM_001717551 | 101.5 | 103.1 | 0.0390 | 1.09 |

|           |                                                                                                       |           |       |       |        |      |
|-----------|-------------------------------------------------------------------------------------------------------|-----------|-------|-------|--------|------|
| NEDD4     | neural precursor cell expressed, developmentally down-regulated 4, E3 ubiquitin protein ligase(NEDD4) | NM_006154 | 95.9  | 106.7 | 0.0390 | 1.21 |
| NEDD4     | neural precursor cell expressed, developmentally down-regulated 4, E3 ubiquitin protein ligase(NEDD4) | NM_006154 | 202.6 | 173.9 | 0.0390 | 1.21 |
|           |                                                                                                       | XR_017364 | 236.8 | 139.8 | 0.0390 | 0.65 |
| HSD17B7P2 | hydroxysteroid 17-beta dehydrogenase 7 pseudogene 2(HSD17B7P2)                                        | NR_003086 | 98.5  | 99.7  | 0.0390 | 1.09 |
| MEF2A     | myocyte enhancer factor 2A(MEF2A)                                                                     | NM_005587 | 97.5  | 93.3  | 0.0390 | 1.3  |
| MEF2A     | myocyte enhancer factor 2A(MEF2A)                                                                     | NM_005587 | 104   | 122.2 | 0.0390 | 1.3  |
| KATNA1    | katanin catalytic subunit A1(KATNA1)                                                                  | NM_007044 | 190.6 | 226.5 | 0.0390 | 1.32 |

|        |                                                                      |               |       |       |        |      |               |      |       |
|--------|----------------------------------------------------------------------|---------------|-------|-------|--------|------|---------------|------|-------|
| FAM26D | family with<br>sequence<br>similarity 26<br>member<br>D(FAM26D)      | NM_15303<br>6 | 106.6 | 92.8  | 0.0400 | 0.92 |               |      |       |
| FAM26D | family with<br>sequence<br>similarity 26<br>member<br>D(FAM26D)      | NM_15303<br>6 | 121.7 | 103.4 | 0.0400 | 0.92 |               |      |       |
|        |                                                                      | XM_92942<br>7 | 156.5 | 119.7 | 0.0400 | 0.86 | NM_0172<br>53 | 1.16 | 16.79 |
| ELP5   | elongator<br>acetyltransferase<br>complex subunit<br>5(ELP5)         | NM_20341<br>3 | 132.5 | 137.6 | 0.0400 | 1.19 |               |      |       |
| ELP5   | elongator<br>acetyltransferase<br>complex subunit<br>5(ELP5)         | NM_20341<br>3 | 247.8 | 200.5 | 0.0400 | 1.19 |               |      |       |
| HCCS   | holocytochrome c<br>synthase(HCCS)                                   | NM_00533<br>3 | 109.1 | 100.7 | 0.0400 | 0.66 |               |      |       |
| HCCS   | holocytochrome c<br>synthase(HCCS)                                   | NM_00533<br>3 | 302   | 166.4 | 0.0400 | 0.66 |               |      |       |
| PTPN23 | protein tyrosine<br>phosphatase, non-<br>receptor type<br>23(PTPN23) | NM_01546<br>6 | 101.1 | 106.7 | 0.0400 | 1.16 |               |      |       |
| RBM39  | RNA binding motif<br>protein<br>39(RBM39)                            | NM_18423<br>7 | 103.9 | 114.3 | 0.0400 | 1.22 |               |      |       |

|          |                                                       |           |        |        |        |      |
|----------|-------------------------------------------------------|-----------|--------|--------|--------|------|
| HMGCS1   | 3-hydroxy-3-methylglutaryl-CoA synthase 1(HMGCS1)     | NM_002130 | 599.5  | 385    | 0.0400 | 0.73 |
| SOX21    | SRY-box 21(SOX21)                                     | NM_007084 | 111.9  | 88.8   | 0.0400 | 0.85 |
| SRPK1    | SRSF protein kinase 1(SRPK1)                          | NM_003137 | 110.4  | 89.9   | 0.0400 | 0.87 |
| SUCLG2   | succinate-CoA ligase GDP-forming beta subunit(SUCLG2) | NM_003848 | 157.2  | 106.9  | 0.0400 | 0.76 |
|          |                                                       | XM_379270 | 119.7  | 93.6   | 0.0400 | 0.82 |
|          |                                                       | XM_938817 | 116.7  | 98.7   | 0.0400 | 0.92 |
| STAMBPL1 | STAM binding protein like 1(STAMBPL1)                 | NM_020799 | 121.7  | 178.1  | 0.0400 | 1.67 |
| H3F3AP4  | H3 histone, family 3A, pseudogene 4(H3F3AP4)          | NR_002315 | 468.8  | 162.3  | 0.0400 | 0.41 |
| H3F3AP4  | H3 histone, family 3A, pseudogene 4(H3F3AP4)          | NR_002315 | 2589.7 | 2420.9 | 0.0400 | 0.41 |
| LIMS1    | LIM zinc finger domain containing 1(LIMS1)            | NM_004987 | 96.9   | 88.8   | 0.0400 | 1.15 |



|         |                                                       |           |        |       |        |      |
|---------|-------------------------------------------------------|-----------|--------|-------|--------|------|
| LIMS1   | LIM zinc finger domain containing 1(LIMS1)            | NM_004987 | 136    | 138.6 | 0.0400 | 1.15 |
| PRSS3P2 | protease, serine 3 pseudogene 2(PRSS3P2)              | NR_001296 | 95.5   | 100.1 | 0.0400 | 1.12 |
| PYGL    | phosphorylase, glycogen, liver(PYGL)                  | NM_002863 | 149.1  | 113.9 | 0.0400 | 0.83 |
| CYP2S1  | cytochrome P450 family 2 subfamily S member 1(CYP2S1) | NM_030622 | 134.6  | 108.5 | 0.0400 | 0.89 |
| S100A10 | S100 calcium binding protein A10(S100A10)             | NM_002966 | 128.4  | 98.1  | 0.0400 | 0.82 |
| S100A10 | S100 calcium binding protein A10(S100A10)             | NM_002966 | 679.2  | 583.1 | 0.0400 | 0.82 |
| ZNHIT1  | zinc finger HIT-type containing 1(ZNHIT1)             | NM_006349 | 1690.2 | 1015  | 0.0400 | 0.68 |
|         |                                                       | XM_928726 | 147    | 114.2 | 0.0400 | 0.86 |
| DFNA5   | DFNA5, deafness associated tumor suppressor(DFNA5)    | NM_004403 | 238.1  | 143.6 | 0.0400 | 0.65 |
|         |                                                       | XM_942417 | 112.2  | 94.9  | 0.0400 | 0.89 |

|               |                                                           |               |       |       |        |      |
|---------------|-----------------------------------------------------------|---------------|-------|-------|--------|------|
| USP1          | ubiquitin specific<br>peptidase<br>1(USP1)                | NM_00336<br>8 | 93.7  | 107.1 | 0.0400 | 1.24 |
|               |                                                           | BU182441      | 133   | 107.6 | 0.0400 | 0.88 |
|               |                                                           | XM_93637<br>5 | 90.7  | 96.5  | 0.0400 | 1.14 |
| CNOT3         | CCR4-NOT<br>transcription<br>complex subunit<br>3(CNOT3)  | NM_01451<br>6 | 102.1 | 107.7 | 0.0400 | 1.15 |
| ABCC3         | ATP binding<br>cassette subfamily<br>C member<br>3(ABCC3) | NM_02003<br>8 | 108.7 | 109.2 | 0.0410 | 1.09 |
|               |                                                           | XM_93138<br>1 | 336.9 | 181.6 | 0.0410 | 0.62 |
| KRTAP1<br>3-4 | keratin associated<br>protein 13-<br>4(KRTAP13-4)         | NM_18160<br>0 | 132.8 | 104.3 | 0.0410 | 0.86 |
| SLC25A<br>48  | solute carrier<br>family 25 member<br>48(SLC25A48)        | NM_14528<br>2 | 182.4 | 137.1 | 0.0410 | 0.85 |
| PRAM1         | PML-RARA<br>regulated adaptor<br>molecule<br>1(PRAM1)     | NM_03215<br>2 | 117.5 | 101.1 | 0.0410 | 0.92 |
| BIRC2         | baculoviral IAP<br>repeat containing<br>2(BIRC2)          | NM_00116<br>6 | 128.7 | 131.1 | 0.0410 | 1.3  |

|        |                                                         |                  |       |       |        |      |
|--------|---------------------------------------------------------|------------------|-------|-------|--------|------|
| BIRC2  | baculoviral IAP repeat containing 2(BIRC2)              | NM_001116<br>6   | 171.2 | 202.2 | 0.0410 | 1.3  |
|        |                                                         | BU734093         | 136.2 | 141.7 | 0.0410 | 1.18 |
|        |                                                         | XM_00171<br>9745 | 104.4 | 123.6 | 0.0410 | 1.29 |
| FKRP   | fukutin related protein(FKRP)                           | NM_02430<br>1    | 111.4 | 118.1 | 0.0410 | 1.17 |
| MAP2K2 | mitogen-activated protein kinase 2(MAP2K2)              | NM_03066<br>2    | 118.9 | 93    | 0.0410 | 0.85 |
| BCOR   | BCL6 corepressor(BCOR)                                  | NM_01774<br>5    | 215.9 | 250.5 | 0.0410 | 1.3  |
| JADE1  | jade family PHD finger 1(JADE1)                         | NM_19932<br>0    | 202.2 | 150.5 | 0.0410 | 0.83 |
| NFAT5  | nuclear factor of activated T-cells 5(NFAT5)            | NM_17321<br>5    | 101.4 | 108   | 0.0410 | 1.16 |
| ASUN   | asunder, spermatogenesis regulator(ASUN)                | NM_01816<br>4    | 103.3 | 108.8 | 0.0410 | 1.18 |
| ASUN   | asunder, spermatogenesis regulator(ASUN)                | NM_01816<br>4    | 133.4 | 139.3 | 0.0410 | 1.18 |
| MKNK2  | MAP kinase interacting serine/threonine kinase 2(MKNK2) | NM_19905<br>4    | 352.4 | 221.1 | 0.0410 | 0.73 |
|        |                                                         | CB048233         | 94.5  | 101.6 | 0.0410 | 1.16 |

|          |                                                           |           |       |       |        |      |
|----------|-----------------------------------------------------------|-----------|-------|-------|--------|------|
| TMED9    | transmembrane p24 trafficking protein 9(TMED9)            | NM_017510 | 262.4 | 187.4 | 0.0410 | 0.8  |
| CNIH2    | cornichon family AMPA receptor auxiliary protein 2(CNIH2) | NM_182553 | 111.8 | 103.9 | 0.0410 | 0.83 |
| CNIH2    | cornichon family AMPA receptor auxiliary protein 2(CNIH2) | NM_182553 | 136.5 | 102.3 | 0.0410 | 0.83 |
| CNIH2    | cornichon family AMPA receptor auxiliary protein 2(CNIH2) | NM_182553 | 164.8 | 133.1 | 0.0410 | 0.83 |
| GPR180   | G protein-coupled receptor 180(GPR180)                    | NM_180989 | 122.3 | 130.2 | 0.0410 | 1.22 |
|          |                                                           | BU685158  | 98.4  | 101   | 0.0410 | 1.12 |
| PRICKLE1 | prickle planar cell polarity protein 1(PRICKLE1)          | NM_153026 | 126.2 | 161.6 | 0.0410 | 1.43 |
|          |                                                           | XM_943683 | 118.6 | 98.8  | 0.0410 | 0.9  |
| SSR1     | signal sequence receptor subunit 1(SSR1)                  | NM_003144 | 443   | 498.9 | 0.0410 | 1.26 |
| NFX1     | nuclear transcription factor, X-box binding 1(NFX1)       | NM_147133 | 121.5 | 125.1 | 0.0410 | 1.16 |

|          |                                                                    |              |        |        |        |      |
|----------|--------------------------------------------------------------------|--------------|--------|--------|--------|------|
| NFX1     | nuclear transcription factor, X-box binding 1(NFX1)                | NM_147133    | 181.8  | 136.2  | 0.0410 | 1.16 |
| MT1E     | metallothionein 1E(MT1E)                                           | NM_175617    | 130.8  | 103.5  | 0.0410 | 0.41 |
| MT1E     | metallothionein 1E(MT1E)                                           | NM_175617    | 5309.7 | 1957.7 | 0.0410 | 0.41 |
| NEMF     | nuclear export mediator factor(NEMF)                               | NM_004713    | 205.5  | 245.1  | 0.0410 | 1.32 |
| POTEH    | POTE ankyrin domain family member H(POTEH)                         | NM_001004053 | 103.1  | 112    | 0.0410 | 1.18 |
|          |                                                                    | XR_040084    | 95.9   | 100    | 0.0410 | 1.13 |
| MAPK8IP2 | mitogen-activated protein kinase 8 interacting protein 2(MAPK8IP2) | NM_016431    | 143    | 124    | 0.0410 | 0.88 |
| MAPK8IP2 | mitogen-activated protein kinase 8 interacting protein 2(MAPK8IP2) | NM_016431    | 146.3  | 115.8  | 0.0410 | 0.88 |
|          |                                                                    | XR_038700    | 115.6  | 89.3   | 0.0420 | 0.84 |

|         |                                                     |              |       |       |        |      |              |       |        |
|---------|-----------------------------------------------------|--------------|-------|-------|--------|------|--------------|-------|--------|
| RAPGEF1 | Rap guanine nucleotide exchange factor 1(RAPGEF1)   | NM_005312    | 144.9 | 115   | 0.0420 | 0.89 |              |       |        |
| STK10   | serine/threonine kinase 10(STK10)                   | NM_005990    | 211.8 | 147.7 | 0.0420 | 0.8  | NM_019368    | 2.87  | 13.68  |
|         |                                                     | XM_001725448 | 135   | 109.8 | 0.0420 | 0.88 |              |       |        |
| PSENEN  | presenilin enhancer gamma-secretase subunit(PSENEN) | NM_172341    | 269.7 | 198.5 | 0.0420 | 0.85 |              |       |        |
| UIMC1   | ubiquitin interaction motif containing 1(UIMC1)     | NM_016290    | 199.8 | 249.3 | 0.0420 | 1.4  |              |       |        |
|         |                                                     | XM_001128559 | 118.5 | 89.6  | 0.0420 | 0.81 |              |       |        |
| KMT2E   | lysine methyltransferase 2E(KMT2E)                  | NM_182931    | 144.7 | 190.2 | 0.0420 | 1.49 |              |       |        |
| KMT2E   | lysine methyltransferase 2E(KMT2E)                  | NM_182931    | 171   | 135.3 | 0.0420 | 1.49 |              |       |        |
| OGDH    | oxoglutarate dehydrogenase(OGDH)                    | NM_002541    | 333.9 | 208.1 | 0.0420 | 0.71 | NM_001037554 | 15.49 | 101.99 |

|          |                                                                 |              |       |       |        |      |           |            |
|----------|-----------------------------------------------------------------|--------------|-------|-------|--------|------|-----------|------------|
| B3GALNT2 | beta-1,3-N-acetylgalactosaminyltransferase 2(B3GALNT2)          | NM_152490    | 118.6 | 137   | 0.0420 | 1.29 |           |            |
| DCTD     | dCMP deaminase(DCTD)                                            | NM_001921    | 142.3 | 148.9 | 0.0420 | 1.15 |           |            |
| HLA-DPB1 | major histocompatibility complex, class II, DP beta 1(HLA-DPB1) | NM_002121    | 116.5 | 95.9  | 0.0420 | 0.89 | NM_017087 | 51.82 0.25 |
|          |                                                                 | XM_933749    | 123.3 | 101.2 | 0.0420 | 0.9  |           |            |
| NDUFA10  | NADH:ubiquinone oxidoreductase subunit A10(NDUFA10)             | NM_004544    | 102.4 | 96.8  | 0.0420 | 0.79 |           |            |
| NDUFA10  | NADH:ubiquinone oxidoreductase subunit A10(NDUFA10)             | NM_004544    | 118.1 | 88.1  | 0.0420 | 0.79 |           |            |
| OR2A5    | olfactory receptor family 2 subfamily A member 5(OR2A5)         | NM_012365    | 111.1 | 91.7  | 0.0420 | 0.88 |           |            |
|          |                                                                 | XM_001720686 | 194.7 | 126   | 0.0420 | 0.73 |           |            |
| GLTSCR1L | GLTSCR1 like(GLTSCR1L)                                          | NM_015349    | 150.6 | 208.6 | 0.0420 | 1.5  |           |            |

|                |                                                                  |               |       |       |        |      |
|----------------|------------------------------------------------------------------|---------------|-------|-------|--------|------|
| TM7SF3         | transmembrane 7<br>superfamily<br>member<br>3(TM7SF3)            | NM_01655<br>1 | 189.5 | 131.8 | 0.0420 | 0.8  |
| PXMP4          | peroxisomal<br>membrane protein<br>4(PXMP4)                      | NM_18339<br>7 | 129.5 | 133.2 | 0.0420 | 1.15 |
|                |                                                                  | XR_03926<br>3 | 114.9 | 115.4 | 0.0420 | 1.13 |
| SNORD<br>113-1 | small nucleolar<br>RNA, C/D box 113-<br>1(SNORD113-1)            | NR_00322<br>9 | 101.4 | 107.8 | 0.0420 | 1.17 |
| CBX5           | chromobox<br>5(CBX5)                                             | NM_01211<br>7 | 110.4 | 144.6 | 0.0420 | 1.48 |
| ALPK3          | alpha kinase<br>3(ALPK3)                                         | NM_02077<br>8 | 179.2 | 129.7 | 0.0420 | 0.83 |
| FARP1          | FERM,<br>ARH/RhoGEF and<br>pleckstrin domain<br>protein 1(FARP1) | NM_00576<br>6 | 144   | 112.7 | 0.0420 | 0.86 |
|                |                                                                  | XM_94543<br>0 | 110.6 | 120.5 | 0.0420 | 1.22 |
|                |                                                                  | BE673312      | 167.8 | 97.6  | 0.0420 | 0.66 |
| ZEB1-<br>AS1   | ZEB1 antisense<br>RNA 1(ZEB1-<br>AS1)                            | AK026657      | 112.3 | 91.7  | 0.0420 | 0.87 |
| FBXO28         | F-box protein<br>28(FBXO28)                                      | NM_01517<br>6 | 118.8 | 135.7 | 0.0420 | 1.25 |



|          |                                                                      |              |        |       |        |      |
|----------|----------------------------------------------------------------------|--------------|--------|-------|--------|------|
| CAPN5    | calpain 5(CAPN5)                                                     | NM_004055    | 399.8  | 209.9 | 0.0430 | 0.61 |
| ARHGAP26 | Rho GTPase activating protein 26(ARHGAP26)                           | NM_015071    | 116.5  | 95.1  | 0.0430 | 0.88 |
| NSUN4    | NOP2/Sun RNA methyltransferase family member 4(NSUN4)                | NM_199044    | 99.7   | 104.7 | 0.0430 | 1.14 |
| ATRAID   | all-trans retinoic acid induced differentiation factor(ATRAID)       | NM_080592    | 831.4  | 584.6 | 0.0430 | 0.62 |
| ATRAID   | all-trans retinoic acid induced differentiation factor(ATRAID)       | NM_080592    | 1464.5 | 799.2 | 0.0430 | 0.62 |
|          |                                                                      | XR_017229    | 353.9  | 188   | 0.0430 | 0.61 |
|          |                                                                      | DA453004     | 144    | 110.2 | 0.0430 | 0.86 |
| NPIPB13  | nuclear pore complex interacting protein family, member B13(NPIPB13) | NR_002555    | 209    | 141   | 0.0430 | 0.78 |
|          |                                                                      | XM_001723520 | 111.9  | 112.7 | 0.0430 | 1.11 |
|          |                                                                      | AI633632     | 156.9  | 120.5 | 0.0430 | 0.86 |
| MT1X     | metallothionein 1X(MT1X)                                             | NM_005952    | 6772.5 | 2570  | 0.0430 | 0.44 |

|        |                                                                |                  |        |        |        |      |                  |      |       |
|--------|----------------------------------------------------------------|------------------|--------|--------|--------|------|------------------|------|-------|
|        |                                                                | XR_03831<br>4    | 3375.1 | 4770.6 | 0.0430 | 1.35 | NM_0010<br>25767 | 5.06 | 85.80 |
| SMC4   | structural<br>maintenance of<br>chromosomes<br>4(SMC4)         | NM_00100<br>2800 | 86.2   | 102.3  | 0.0430 | 1.29 |                  |      |       |
| RAD54L | RAD54-like (S.<br>cerevisiae)(RAD5<br>4L)                      | NM_00357<br>9    | 95.5   | 104.6  | 0.0430 | 1.2  | NM_0010<br>37349 | 4.94 | 35.26 |
| ARL5B  | ADP ribosylation<br>factor like GTPase<br>5B(ARL5B)            | NM_17881<br>5    | 92.4   | 98.2   | 0.0430 | 1.13 | NM_0010<br>37349 | 4.94 | 35.26 |
| CYP8B1 | cytochrome P450<br>family 8 subfamily<br>B member<br>1(CYP8B1) | NM_00439<br>1    | 254.8  | 153.8  | 0.0430 | 0.67 |                  |      |       |
|        |                                                                | XM_92611<br>2    | 143.2  | 161.8  | 0.0430 | 1.27 |                  |      |       |
| PSME1  | proteasome<br>activator subunit<br>1(PSME1)                    | NM_17678<br>3    | 113.7  | 112    | 0.0430 | 1.1  |                  |      |       |
| MDC1   | mediator of DNA<br>damage<br>checkpoint<br>1(MDC1)             | NM_01464<br>1    | 249.2  | 300.8  | 0.0430 | 1.34 |                  |      |       |
|        |                                                                | BF194881         | 131.1  | 107.8  | 0.0430 | 0.87 |                  |      |       |
| SCRIB  | scribbled planar<br>cell polarity<br>protein(SCRIB)            | NM_18270<br>6    | 110.8  | 113.3  | 0.0430 | 1.14 |                  |      |       |

|         |                                                 |              |        |        |        |      |              |            |
|---------|-------------------------------------------------|--------------|--------|--------|--------|------|--------------|------------|
| TMEM128 | transmembrane protein 128(TMEM128)              | NM_032927    | 119    | 100    | 0.0430 | 0.91 |              |            |
|         |                                                 | XR_038706    | 316.4  | 360.2  | 0.0430 | 1.3  |              |            |
| SON     | SON DNA binding protein(SON)                    | NM_138927    | 119.6  | 122.1  | 0.0430 | 1.13 |              |            |
| SON     | SON DNA binding protein(SON)                    | NM_138927    | 171.9  | 176    | 0.0430 | 1.13 | NM_001107368 | 10.94 1.12 |
| SON     | SON DNA binding protein(SON)                    | NM_138927    | 1267.9 | 1422.7 | 0.0430 | 1.13 |              |            |
| ZNF471  | zinc finger protein 471(ZNF471)                 | NM_020813    | 100    | 113.7  | 0.0430 | 1.23 |              |            |
| ZNF471  | zinc finger protein 471(ZNF471)                 | NM_020813    | 135.5  | 131.7  | 0.0430 | 1.23 |              |            |
| IPO11   | importin 11(IPO11)                              | NM_016338    | 227.6  | 242.9  | 0.0430 | 1.22 |              |            |
|         |                                                 | XM_001132362 | 108.5  | 91.4   | 0.0430 | 0.89 |              |            |
| BIRC5   | baculoviral IAP repeat containing 5(BIRC5)      | NM_0011168   | 94.2   | 113.8  | 0.0440 | 1.31 |              |            |
| LSM1    | LSM1 homolog, mRNA degradation associated(LSM1) | NM_014462    | 354.8  | 371    | 0.0440 | 1.17 |              |            |

|         |                                                    |              |       |       |        |      |
|---------|----------------------------------------------------|--------------|-------|-------|--------|------|
| CSNK2B  | casein kinase 2 beta(CSNK2B)                       | NM_001320    | 465.5 | 332.4 | 0.0440 | 0.82 |
|         |                                                    | BF375676     | 104.8 | 114.8 | 0.0440 | 1.2  |
| JAG1    | jagged 1(JAG1)                                     | NM_000214    | 132.6 | 132.6 | 0.0440 | 1.14 |
| DUSP27  | dual specificity phosphatase 27 (putative)(DUSP27) | NM_001080426 | 107.7 | 111.5 | 0.0440 | 1.13 |
| TSPAN17 | tetraspanin 17(TSPAN17)                            | NM_012171    | 158.7 | 169.5 | 0.0440 | 1.24 |
| SLC30A7 | solute carrier family 30 member 7(SLC30A7)         | NM_133496    | 346.9 | 431.7 | 0.0440 | 1.43 |
| SP140   | SP140 nuclear body protein(SP140)                  | NM_001005176 | 81.4  | 99.1  | 0.0440 | 1.32 |
|         |                                                    | DB344577     | 136   | 106.1 | 0.0440 | 0.86 |
|         |                                                    | XM_001126647 | 112.3 | 123.9 | 0.0440 | 1.24 |
|         |                                                    | XM_001126647 | 118.3 | 108.3 | 0.0440 | 1.24 |
| FER1L5  | fer-1 like family member 5(FER1L5)                 | NM_001077400 | 167.4 | 127.7 | 0.0440 | 0.87 |
| FER1L5  | fer-1 like family member 5(FER1L5)                 | NM_001077400 | 249.8 | 184.4 | 0.0440 | 0.87 |
| RWDD2A  | RWD domain containing 2A(RWDD2A)                   | AJ420581     | 228.2 | 154.5 | 0.0440 | 0.78 |

|        |                                                                       |           |        |        |        |      |           |              |
|--------|-----------------------------------------------------------------------|-----------|--------|--------|--------|------|-----------|--------------|
| ZNF2   | zinc finger protein 2(ZNF2)                                           | NM_021088 | 102.5  | 105.9  | 0.0440 | 1.12 |           |              |
| NQO1   | NAD(P)H quinone dehydrogenase 1(NQO1)                                 | NM_000903 | 141.9  | 100.9  | 0.0440 | 0.79 |           |              |
| NQO1   | NAD(P)H quinone dehydrogenase 1(NQO1)                                 | NM_000903 | 3501.7 | 2236.7 | 0.0440 | 0.79 | NM_017312 | 61.39 265.99 |
|        |                                                                       | BG911604  | 126.8  | 99.5   | 0.0440 | 0.84 |           |              |
| LRCH3  | leucine rich repeats and calponin homology domain containing 3(LRCH3) | NM_032773 | 144.3  | 174.9  | 0.0440 | 1.35 |           |              |
| PDE11A | phosphodiesterase 11A(PDE11A)                                         | NM_016953 | 110.6  | 91.2   | 0.0440 | 0.87 |           |              |
| SRSF5  | serine and arginine rich splicing factor 5(SRSF5)                     | NM_006925 | 1451.3 | 1528.5 | 0.0440 | 1.28 |           |              |
| SRSF5  | serine and arginine rich splicing factor 5(SRSF5)                     | NM_006925 | 1464.5 | 1688   | 0.0440 | 1.28 |           |              |
| MGAM   | maltase-glucoamylase(MGAM)                                            | NM_004668 | 117.3  | 91.8   | 0.0440 | 0.84 |           |              |

|             |                                                        |                  |        |        |        |      |
|-------------|--------------------------------------------------------|------------------|--------|--------|--------|------|
| IL2RG       | interleukin 2<br>receptor subunit<br>gamma(IL2RG)      | NM_00020<br>6    | 94.1   | 107.7  | 0.0440 | 1.26 |
|             |                                                        | XM_00172<br>4244 | 116.4  | 117.2  | 0.0440 | 1.14 |
| FAM120<br>A | family with<br>sequence<br>similarity<br>120A(FAM120A) | NM_01461<br>2    | 1682.3 | 1799.4 | 0.0440 | 1.19 |
| ZNF524      | zinc finger protein<br>524(ZNF524)                     | NM_15321<br>9    | 151.3  | 160.5  | 0.0440 | 1.2  |
| MARS        | methionyl-tRNA<br>synthetase(MARS<br>)                 | NM_00499<br>0    | 95     | 96.4   | 0.0440 | 1.08 |
| MT1IP       | metallothionein 1I,<br>pseudogene(MT1I<br>P)           | NM_17562<br>1    | 1855.3 | 667.1  | 0.0440 | 0.42 |
| ZC3H3       | zinc finger CCCH-<br>type containing<br>3(ZC3H3)       | NM_01511<br>7    | 177.4  | 182.4  | 0.0450 | 1.18 |
| TTC31       | tetratricopeptide<br>repeat domain<br>31(TTC31)        | NM_02249<br>2    | 209.4  | 235.6  | 0.0450 | 1.27 |
|             |                                                        | XM_00172<br>3153 | 123.9  | 88.5   | 0.0450 | 0.78 |
| WDR4        | WD repeat<br>domain 4(WDR4)                            | NM_03366<br>1    | 98     | 100.8  | 0.0450 | 1.1  |
| DERL2       | derlin 2(DERL2)                                        | AK092218         | 142.3  | 112.5  | 0.0450 | 0.86 |
|             |                                                        | AW136029         | 148.4  | 115.2  | 0.0450 | 0.87 |

|         |                                                                            |               |       |       |        |      |
|---------|----------------------------------------------------------------------------|---------------|-------|-------|--------|------|
| dhx37   | DEAH-box<br>helicase<br>37(DHX37)                                          | NM_03265<br>6 | 166.2 | 201.6 | 0.0450 | 1.39 |
| st6gal1 | ST6 beta-<br>galactoside alpha-<br>2,6-<br>sialyltransferase<br>1(ST6GAL1) | NM_00303<br>2 | 104.6 | 109.5 | 0.0450 | 0.78 |
| st6gal1 | ST6 beta-<br>galactoside alpha-<br>2,6-<br>sialyltransferase<br>1(ST6GAL1) | NM_00303<br>2 | 167.9 | 116.2 | 0.0450 | 0.78 |
|         |                                                                            | XM_93002<br>9 | 348.7 | 229   | 0.0450 | 0.75 |
|         |                                                                            | XM_94243<br>9 | 189.3 | 140   | 0.0450 | 0.84 |
| ak5     | adenylate kinase<br>5(AK5)                                                 | NM_01209<br>3 | 124.3 | 95.3  | 0.0450 | 0.84 |
|         |                                                                            | NR_00221<br>4 | 147.6 | 110.4 | 0.0450 | 0.83 |
| AMPD3   | adenosine<br>monophosphate<br>deaminase<br>3(AMPD3)                        | NM_00048<br>0 | 137.6 | 111.8 | 0.0450 | 0.89 |
|         |                                                                            | XM_93770<br>6 | 375.2 | 242.9 | 0.0450 | 0.74 |
| SF3A3   | splicing factor 3a<br>subunit 3(SF3A3)                                     | NM_00680<br>2 | 817.1 | 906.7 | 0.0450 | 1.26 |
|         |                                                                            | XM_93557<br>5 | 104.3 | 112   | 0.0450 | 1.2  |

|        |                                                                   |              |       |       |        |      |
|--------|-------------------------------------------------------------------|--------------|-------|-------|--------|------|
| EIF2B4 | eukaryotic translation initiation factor 2B subunit delta(EIF2B4) | NM_172195    | 106.5 | 106.4 | 0.0450 | 1.1  |
| YTHDC1 | YTH domain containing 1(YTHDC1)                                   | NM_001031732 | 103.1 | 102.1 | 0.0450 | 1.31 |
| YTHDC1 | YTH domain containing 1(YTHDC1)                                   | NM_001031732 | 104   | 123.2 | 0.0450 | 1.31 |
| YTHDC1 | YTH domain containing 1(YTHDC1)                                   | NM_001031732 | 729.1 | 833.2 | 0.0450 | 1.31 |
| TEX10  | testis expressed 10(TEX10)                                        | NM_017746    | 125.4 | 145.9 | 0.0450 | 1.33 |
| MTNR1B | melatonin receptor 1B(MTNR1B)                                     | NM_005959    | 95.3  | 102.3 | 0.0450 | 1.15 |
| PLIN5  | perilipin 5(PLIN5)                                                | NM_001013706 | 372.8 | 494.9 | 0.0450 | 1.54 |
| SDHAF1 | succinate dehydrogenase complex assembly factor 1(SDHAF1)         | NM_001042631 | 114.9 | 119.6 | 0.0460 | 1.16 |
| PI15   | peptidase inhibitor 15(PI15)                                      | NM_015886    | 95.2  | 98.4  | 0.0460 | 1.11 |
| PI15   | peptidase inhibitor 15(PI15)                                      | NM_015886    | 136.8 | 117   | 0.0460 | 1.11 |



|            |                                                                              |                  |       |       |        |      |                  |      |       |
|------------|------------------------------------------------------------------------------|------------------|-------|-------|--------|------|------------------|------|-------|
| POU2F2     | POU class 2<br>homeobox<br>2(POU2F2)                                         | NM_00269<br>8    | 91.4  | 104.4 | 0.0460 | 1.25 | NM_0011<br>07453 | 3.00 | 15.94 |
| KLHL7      | kelch like family<br>member<br>7(KLHL7)                                      | NM_00103<br>1710 | 112.5 | 115.2 | 0.0460 | 1.11 |                  |      |       |
| ARAP1      | ArfGAP with<br>RhoGAP domain,<br>ankyrin repeat<br>and PH domain<br>1(ARAP1) | NM_00104<br>0118 | 108.1 | 117.7 | 0.0460 | 1.21 |                  |      |       |
| ARAP1      | ArfGAP with<br>RhoGAP domain,<br>ankyrin repeat<br>and PH domain<br>1(ARAP1) | NM_00104<br>0118 | 114.3 | 118.6 | 0.0460 | 1.21 |                  |      |       |
|            |                                                                              | XM_00172<br>1348 | 107   | 115.9 | 0.0460 | 1.2  |                  |      |       |
| SOX30      | SRY-box<br>30(SOX30)                                                         | NM_17842<br>4    | 203.1 | 134.7 | 0.0460 | 0.76 |                  |      |       |
| PDX1       | pancreatic and<br>duodenal<br>homeobox<br>1(PDX1)                            | NM_00020<br>9    | 150.3 | 121.4 | 0.0460 | 0.9  |                  |      |       |
| RWDD2<br>B | RWD domain<br>containing<br>2B(RWDD2B)                                       | NM_01694<br>0    | 299.1 | 185.6 | 0.0460 | 0.72 |                  |      |       |
|            |                                                                              | XM_94239<br>9    | 98.4  | 103.1 | 0.0460 | 1.15 |                  |      |       |
| IL17C      | interleukin<br>17C(IL17C)                                                    | NM_01327<br>8    | 230.6 | 155.9 | 0.0460 | 0.78 |                  |      |       |

|          |                                                                                   |              |       |       |        |      |
|----------|-----------------------------------------------------------------------------------|--------------|-------|-------|--------|------|
| MAP1LC3A | microtubule associated protein 1 light chain 3 alpha(MAP1LC3A)                    | NM_181509    | 774.1 | 844.6 | 0.0460 | 1.23 |
| ZNF816   | zinc finger protein 816(ZNF816)                                                   | NM_001031665 | 107.7 | 111.6 | 0.0460 | 1.14 |
|          |                                                                                   | XM_001717865 | 116.1 | 99.2  | 0.0460 | 0.93 |
| TAGLN3   | transgelin 3(TAGLN3)                                                              | NM_001008273 | 116.1 | 97.4  | 0.0460 | 0.91 |
| acap3    | ArfGAP with coiled-coil, ankyrin repeat and PH domains 3(ACAP3)                   | NM_030649    | 92.1  | 98.2  | 0.0460 | 1.14 |
| SNHG11   | small nucleolar RNA host gene 11(SNHG11)                                          | NR_003239    | 383.3 | 257.4 | 0.0460 | 0.78 |
| MAMSTR   | MEF2 activating motif and SAP domain containing transcriptional regulator(MAMSTR) | NM_182574    | 156.7 | 115.6 | 0.0460 | 0.83 |
| ITM2B    | integral membrane protein 2B(ITM2B)                                               | NM_021999    | 120.8 | 84.1  | 0.0460 | 0.75 |

|          |                                                           |              |       |        |        |      |
|----------|-----------------------------------------------------------|--------------|-------|--------|--------|------|
| ITM2B    | integral membrane protein 2B(ITM2B)                       | NM_021999    | 4258  | 3405.8 | 0.0460 | 0.75 |
| ENTPD1   | ectonucleoside triphosphate diphosphohydrolase 1(ENTPD1)  | NM_001098175 | 106.3 | 127.1  | 0.0460 | 1.35 |
| GEM      | GTP binding protein overexpressed in skeletal muscle(GEM) | NM_181702    | 138.5 | 166.6  | 0.0460 | 1.36 |
| GEM      | GTP binding protein overexpressed in skeletal muscle(GEM) | NM_181702    | 154.3 | 177    | 0.0460 | 1.36 |
| KLHL5    | kelch like family member 5(KLHL5)                         | NM_001007075 | 119.7 | 111.3  | 0.0460 | 0.9  |
| KLHL5    | kelch like family member 5(KLHL5)                         | NM_001007075 | 133.1 | 108.1  | 0.0460 | 0.9  |
| KLHL5    | kelch like family member 5(KLHL5)                         | NM_001007075 | 401.5 | 351.6  | 0.0460 | 0.9  |
| C19orf47 | chromosome 19 open reading frame 47(C19orf47)             | NM_178830    | 153.4 | 119.6  | 0.0470 | 0.86 |

|             |                                                                                  |                  |        |       |        |      |               |               |
|-------------|----------------------------------------------------------------------------------|------------------|--------|-------|--------|------|---------------|---------------|
| MRPS1<br>1  | mitochondrial<br>ribosomal protein<br>S11(MRPS11)                                | NM_17680<br>5    | 249.3  | 172.2 | 0.0470 | 0.77 |               |               |
| MRPS1<br>1  | mitochondrial<br>ribosomal protein<br>S11(MRPS11)                                | NM_17680<br>5    | 457.1  | 374.9 | 0.0470 | 0.77 |               |               |
|             |                                                                                  | XM_00113<br>2864 | 120.5  | 96    | 0.0470 | 0.86 |               |               |
|             |                                                                                  | XM_93071<br>5    | 127.4  | 101.4 | 0.0470 | 0.87 |               |               |
| SEPT2       | septin 2(SEPT2)                                                                  | NM_00440<br>4    | 1066.6 | 1278  | 0.0470 | 1.32 |               |               |
|             |                                                                                  | XM_00171<br>5568 | 126.2  | 122.7 | 0.0470 | 1.1  |               |               |
| FAM86J<br>P | family with<br>sequence<br>similarity 86,<br>member A<br>pseudogene(FAM<br>86JP) | NR_02425<br>0    | 101.6  | 104.8 | 0.0470 | 1.14 | NM_0308<br>48 | 56.65<br>0.04 |
| CYTH3       | cytohesin<br>3(CYTH3)                                                            | NM_00422<br>7    | 311    | 125   | 0.0470 | 0.47 |               |               |
| ttc32       | tetratricopeptide<br>repeat domain<br>32(TTC32)                                  | NM_00100<br>8237 | 181.9  | 199.3 | 0.0470 | 1.23 |               |               |
| ttc32       | tetratricopeptide<br>repeat domain<br>32(TTC32)                                  | NM_00100<br>8237 | 221.6  | 195.1 | 0.0470 | 1.23 |               |               |
| CHKA        | choline kinase<br>alpha(CHKA)                                                    | NM_21246<br>9    | 203.1  | 232.7 | 0.0470 | 1.31 |               |               |

|         |                                                                   |              |       |       |        |      |
|---------|-------------------------------------------------------------------|--------------|-------|-------|--------|------|
| HNRNPM  | heterogeneous nuclear ribonucleoprotein M(HNRNPM)                 | NM_031203    | 242.8 | 324.1 | 0.0470 | 1.49 |
| ABR     | active BCR-related(ABR)                                           | NM_001092    | 319.5 | 373.5 | 0.0470 | 1.33 |
| HOXA7   | homeobox A7(HOXA7)                                                | NM_006896    | 175.5 | 129.8 | 0.0470 | 0.83 |
| EXOC3L1 | exocyst complex component 3 like 1(EXOC3L1)                       | NM_178516    | 102.5 | 113   | 0.0470 | 1.21 |
| NDUFAF3 | NADH:ubiquinone oxidoreductase complex assembly factor 3(NDUFAF3) | NM_199074    | 122.9 | 98.9  | 0.0470 | 0.89 |
| clstn3  | calsyntenin 3(CLSTN3)                                             | NM_014718    | 120.6 | 100.9 | 0.0470 | 0.9  |
| EDNRA   | endothelin receptor type A(EDNRA)                                 | NM_001957    | 85.7  | 93.3  | 0.0470 | 1.16 |
|         |                                                                   | XM_001716912 | 90.4  | 96.6  | 0.0470 | 1.14 |
| PHYKPL  | 5-phosphohydroxy-L-lysine phospholyase(PHYKPL)                    | NM_153373    | 218.2 | 147.5 | 0.0470 | 0.78 |
|         |                                                                   | XM_929696    | 104.1 | 96.7  | 0.0470 | 0.77 |
|         |                                                                   | XM_929696    | 157.3 | 108   | 0.0470 | 0.77 |

|         |                                                  |              |       |       |        |      |           |              |
|---------|--------------------------------------------------|--------------|-------|-------|--------|------|-----------|--------------|
|         |                                                  | XM_001128702 | 147.2 | 114.5 | 0.0470 | 0.87 |           |              |
| ZMYM6   | zinc finger MYM-type containing 6(ZMYM6)         | NM_007167    | 124.4 | 143.4 | 0.0470 | 1.29 |           |              |
|         |                                                  | DB369246     | 111.4 | 112.2 | 0.0470 | 1.11 |           |              |
| FBXO38  | F-box protein 38(FBXO38)                         | NM_030793    | 165.1 | 176.1 | 0.0470 | 1.21 | NM_017258 | 66.46 359.19 |
| FBXO38  | F-box protein 38(FBXO38)                         | NM_030793    | 181.3 | 177.5 | 0.0470 | 1.21 |           |              |
|         |                                                  | XM_001125904 | 126.9 | 135.8 | 0.0470 | 1.22 |           |              |
| ZXDB    | zinc finger, X-linked, duplicated B(ZXDB)        | NM_007157    | 174.1 | 132.8 | 0.0470 | 0.87 |           |              |
| zbtb18  | zinc finger and BTB domain containing 18(ZBTB18) | NM_205768    | 289.4 | 185.5 | 0.0470 | 0.75 |           |              |
|         |                                                  | XM_936103    | 141.5 | 158.8 | 0.0470 | 1.28 |           |              |
| WDR27   | WD repeat domain 27(WDR27)                       | NM_182552    | 210.5 | 153.9 | 0.0470 | 0.83 |           |              |
| SNX29P2 | sorting nexin 29 pseudogene 2(SNX29P2)           | NR_002939    | 401.9 | 263.8 | 0.0470 | 1.89 |           |              |
| SNX29P2 | sorting nexin 29 pseudogene 2(SNX29P2)           | NR_002939    | 800.3 | 1275  | 0.0470 | 1.89 |           |              |

|             |                                                             |                  |        |        |        |      |
|-------------|-------------------------------------------------------------|------------------|--------|--------|--------|------|
| nomo1       | NODAL modulator<br>1(NOMO1)                                 | NM_01428<br>7    | 284.9  | 183.8  | 0.0470 | 0.76 |
| ANAPC<br>11 | anaphase<br>promoting<br>complex subunit<br>11(ANAPC11)     | NM_00100<br>2244 | 173.5  | 128.4  | 0.0470 | 0.84 |
| RNF135      | ring finger protein<br>135(RNF135)                          | NM_19793<br>9    | 121.6  | 131.1  | 0.0470 | 1.23 |
|             |                                                             | XM_00112<br>4651 | 129    | 104.1  | 0.0480 | 0.88 |
| BPTF        | bromodomain<br>PHD finger<br>transcription<br>factor(BPTF)  | NM_18264<br>1    | 167.9  | 123.3  | 0.0480 | 0.83 |
| TENM2       | teneurin<br>transmembrane<br>protein 2(TENM2)               | NM_00108<br>0428 | 109.5  | 108.7  | 0.0480 | 1.09 |
| CTPS1       | CTP synthase<br>1(CTPS1)                                    | NM_00190<br>5    | 110.3  | 148.1  | 0.0480 | 1.52 |
| MEIOB       | meiosis specific<br>with OB<br>domains(MEIOB)               | NM_15276<br>4    | 118.1  | 96     | 0.0480 | 0.85 |
| USP49       | ubiquitin specific<br>peptidase<br>49(USP49)                | NM_01856<br>1    | 1581.2 | 2265.6 | 0.0480 | 1.52 |
| PARP8       | poly(ADP-ribose)<br>polymerase family<br>member<br>8(PARP8) | NM_02461<br>5    | 103.5  | 123.3  | 0.0480 | 1.32 |

|         |                                                                    |              |        |        |        |      |
|---------|--------------------------------------------------------------------|--------------|--------|--------|--------|------|
| eif2ak2 | eukaryotic translation initiation factor 2 alpha kinase 2(EIF2AK2) | NM_002759    | 110.9  | 121.9  | 0.0480 | 1.22 |
| ZNF394  | zinc finger protein 394(ZNF394)                                    | NM_032164    | 1982.7 | 2445.7 | 0.0480 | 1.31 |
|         |                                                                    | BG201242     | 103.3  | 105.5  | 0.0480 | 1.11 |
| EXTL1   | exostosin like glycosyltransferase 1(EXTL1)                        | NM_004455    | 116    | 115.9  | 0.0480 | 1.12 |
| RAB3C   | RAB3C, member RAS oncogene family(RAB3C)                           | NM_138453    | 100.1  | 86.4   | 0.0480 | 0.88 |
| RLF     | rearranged L-myc fusion(RLF)                                       | NM_012421    | 142.3  | 157.2  | 0.0480 | 1.24 |
|         |                                                                    | XM_001720625 | 3030   | 4299.8 | 0.0480 | 1.35 |
|         |                                                                    | XM_934672    | 106.9  | 104.5  | 0.0480 | 1.06 |
| RPF2    | ribosome production factor 2 homolog(RPF2)                         | NM_032194    | 158    | 171.6  | 0.0480 | 1.24 |
|         |                                                                    | NR_003253    | 168    | 128.1  | 0.0480 | 0.86 |
| FSIP1   | fibrous sheath interacting protein 1(FSIP1)                        | NM_152597    | 135.3  | 106.7  | 0.0480 | 0.87 |
|         |                                                                    | XM_940764    | 106.1  | 88.3   | 0.0480 | 0.86 |



|         |                                                        |           |       |       |        |      |
|---------|--------------------------------------------------------|-----------|-------|-------|--------|------|
| ZNF622  | zinc finger protein 622(ZNF622)                        | NM_033414 | 410.6 | 325.4 | 0.0490 | 0.89 |
| CHRNA6  | cholinergic receptor nicotinic alpha 6 subunit(CHRNA6) | NM_004198 | 101.6 | 106.8 | 0.0490 | 1.13 |
| ZBTB32  | zinc finger and BTB domain containing 32(ZBTB32)       | NM_014383 | 89.9  | 98.5  | 0.0490 | 1.17 |
| CBFB    | core-binding factor beta subunit(CBFB)                 | NM_001755 | 100.2 | 106.6 | 0.0490 | 1.15 |
| PCDHB16 | protocadherin beta 16(PCDHB16)                         | NM_020957 | 116   | 93.9  | 0.0490 | 0.85 |
| NLGN4X  | neuroligin 4, X-linked(NLGN4X)                         | NM_020742 | 85.6  | 97.6  | 0.0490 | 1.22 |
| COL20A1 | collagen type XX alpha 1 chain(COL20A1)                | NM_020882 | 381.6 | 203.5 | 0.0490 | 0.63 |
| PIAS4   | protein inhibitor of activated STAT 4(PIAS4)           | NM_015897 | 467.2 | 510.9 | 0.0490 | 1.24 |
| NOP56   | NOP56 ribonucleoprotein(NOP56)                         | NM_006392 | 112   | 111.6 | 0.0490 | 1.73 |
| NOP56   | NOP56 ribonucleoprotein(NOP56)                         | NM_006392 | 343.3 | 532.7 | 0.0490 | 1.73 |

|               |                                                   |                  |       |       |        |      |
|---------------|---------------------------------------------------|------------------|-------|-------|--------|------|
|               |                                                   | XR_04231<br>7    | 119.9 | 119.6 | 0.0490 | 1.13 |
| FBXO4         | F-box protein<br>4(FBXO4)                         | NM_03348<br>4    | 90.8  | 99.3  | 0.0490 | 1.18 |
| Krtap5-1      | keratin associated<br>protein 5-<br>1(KRTAP5-1)   | NM_00100<br>5922 | 118.6 | 100.6 | 0.0490 | 0.93 |
| ITGA2         | integrin subunit<br>alpha 2(ITGA2)                | NM_00220<br>3    | 99.4  | 104.4 | 0.0490 | 1.13 |
| CPVL          | carboxypeptidase,<br>vitellogenic<br>like(CPVL)   | NM_01902<br>9    | 90.5  | 133.4 | 0.0490 | 1.64 |
| XCL1          | X-C motif<br>chemokine ligand<br>1(XCL1)          | NM_00299<br>5    | 106.1 | 90.2  | 0.0490 | 0.9  |
| GUCA1<br>A    | guanylate cyclase<br>activator<br>1A(GUCA1A)      | NM_00040<br>9    | 129.1 | 105.2 | 0.0490 | 0.87 |
| TSC22D<br>2   | TSC22 domain<br>family member<br>2(TSC22D2)       | NM_01477<br>9    | 198.9 | 208   | 0.0490 | 1.35 |
| TSC22D<br>2   | TSC22 domain<br>family member<br>2(TSC22D2)       | NM_01477<br>9    | 406.5 | 483.1 | 0.0490 | 1.35 |
|               |                                                   | XR_03989<br>1    | 102   | 101.8 | 0.0490 | 1.08 |
| KRTAP1<br>0-8 | keratin associated<br>protein 10-<br>8(KRTAP10-8) | NM_19869<br>5    | 100.4 | 100.9 | 0.0490 | 1.1  |

|             |                                                                     |                  |       |       |        |      |
|-------------|---------------------------------------------------------------------|------------------|-------|-------|--------|------|
| CCDC9<br>0B | coiled-coil domain<br>containing<br>90B(CCDC90B)                    | NM_02182<br>5    | 101.4 | 105.8 | 0.0490 | 1.13 |
| DNAJB1<br>4 | DnaJ heat shock<br>protein family<br>(Hsp40) member<br>B14(DNAJB14) | NM_00103<br>1723 | 98.2  | 117.2 | 0.0490 | 1.2  |
| DNAJB1<br>4 | DnaJ heat shock<br>protein family<br>(Hsp40) member<br>B14(DNAJB14) | NM_00103<br>1723 | 110.8 | 121.7 | 0.0490 | 1.2  |
|             |                                                                     | XM_94360<br>0    | 89.2  | 97.3  | 0.0490 | 1.17 |
| SPRED<br>1  | sprouty related<br>EVH1 domain<br>containing<br>1(SPRED1)           | NM_15259<br>4    | 371.3 | 439   | 0.0490 | 1.31 |
| UPK3BL      | uroplakin 3B-<br>like(UPK3BL)                                       | NM_00111<br>4403 | 116.8 | 91.8  | 0.0490 | 0.85 |
| ZNF830      | zinc finger protein<br>830(ZNF830)                                  | NM_05285<br>7    | 134.4 | 143.2 | 0.0490 | 1.19 |
| STAMB<br>P  | STAM binding<br>protein(STAMBP)                                     | NM_00646<br>3    | 126.4 | 132   | 0.0490 | 1.19 |
| STAMB<br>P  | STAM binding<br>protein(STAMBP)                                     | NM_00646<br>3    | 148.9 | 122.4 | 0.0490 | 1.19 |
| ALAD        | aminolevulinate<br>dehydratase(ALA<br>D)                            | NM_00100<br>3945 | 114.6 | 103.1 | 0.0500 | 0.69 |

|          |                                          |              |         |        |        |      |
|----------|------------------------------------------|--------------|---------|--------|--------|------|
| ALAD     | aminolevulinate dehydratase(ALAD)        | NM_001003945 | 370.1   | 223    | 0.0500 | 0.69 |
|          |                                          | XR_040201    | 173.3   | 114.2  | 0.0500 | 0.75 |
| CELF1    | CUGBP, Elav-like family member 1(CELF1)  | NM_198700    | 141.3   | 151.3  | 0.0500 | 1.19 |
| ZNF621   | zinc finger protein 621(ZNF621)          | NM_001098414 | 109.6   | 116.4  | 0.0500 | 1.19 |
| CHM      | CHM, Rab escort protein 1(CHM)           | NM_000390    | 118     | 122.3  | 0.0500 | 1.17 |
| BTLA     | B and T lymphocyte associated(BTLA)      | NM_181780    | 86.4    | 103    | 0.0500 | 1.29 |
| BTLA     | B and T lymphocyte associated(BTLA)      | NM_181780    | 121.9   | 140.4  | 0.0500 | 1.29 |
|          |                                          | AA421413     | 154     | 118.7  | 0.0500 | 0.87 |
|          |                                          | XM_927848    | 123     | 101.2  | 0.0500 | 0.9  |
| RAB30    | RAB30, member RAS oncogene family(RAB30) | NM_014488    | 115.6   | 252.8  | 0.0500 | 2.42 |
| MT1A     | metallothionein 1A(MT1A)                 | NM_005946    | 11240.4 | 4350.9 | 0.0500 | 0.45 |
| RPL36    | ribosomal protein L36(RPL36)             | NM_015414    | 95.5    | 101.3  | 0.0500 | 1.14 |
| FLJ35816 | FLJ35816 protein(FLJ35816)               | NM_207489    | 169.5   | 121.2  | 0.0500 | 0.8  |

|             |                                                                     |               |       |       |        |      |
|-------------|---------------------------------------------------------------------|---------------|-------|-------|--------|------|
| TXLNG       | taxilin<br>gamma(TXLNG)                                             | NM_01836<br>0 | 211.3 | 232.1 | 0.0500 | 1.23 |
| mocs2       | molybdenum<br>cofactor synthesis<br>2(MOCS2)                        | NM_17680<br>6 | 148.7 | 104.2 | 0.0500 | 0.75 |
|             |                                                                     | XM_94073<br>4 | 160.2 | 110.1 | 0.0500 | 0.77 |
| CYP17A<br>1 | cytochrome P450<br>family 17<br>subfamily A<br>member<br>1(CYP17A1) | NM_00010<br>2 | 151.7 | 113.4 | 0.0500 | 0.84 |
| GPKOW       | G-patch domain<br>and KOW<br>motifs(GPKOW)                          | NM_01569<br>8 | 122.3 | 130.7 | 0.0500 | 1.21 |
| PURB        | purine rich<br>element binding<br>protein B(PURB)                   | NM_03322<br>4 | 536.6 | 636   | 0.0500 | 1.35 |
| BRSK1       | BR<br>serine/threonine<br>kinase 1(BRSK1)                           | NM_03243<br>0 | 146.6 | 154.8 | 0.0500 | 1.22 |
| CCNT2       | cyclin T2(CCNT2)                                                    | NM_00124<br>1 | 101.4 | 109.2 | 0.0500 | 1.17 |
| MVP         | major vault<br>protein(MVP)                                         | NM_00511<br>5 | 200.5 | 210.9 | 0.0500 | 1.2  |
| DGKQ        | diacylglycerol<br>kinase<br>theta(DGKQ)                             | NM_00134<br>7 | 104.3 | 110.5 | 0.0500 | 1.16 |
|             |                                                                     | XM_94072<br>6 | 110.2 | 91.5  | 0.0500 | 0.88 |

|       |                                                         |               |       |       |        |      |
|-------|---------------------------------------------------------|---------------|-------|-------|--------|------|
|       |                                                         | XM_94072<br>6 | 136.9 | 109.4 | 0.0500 | 0.88 |
| HM13  | histocompatibility<br>minor 13(HM13)                    | NM_17858<br>0 | 132.4 | 107.8 | 0.0500 | 0.87 |
| HM13  | histocompatibility<br>minor 13(HM13)                    | NM_17858<br>0 | 175   | 143.4 | 0.0500 | 0.87 |
| TNPO3 | transportin<br>3(TNPO3)                                 | NM_01247<br>0 | 279.4 | 297.4 | 0.0500 | 1.2  |
| AGFG1 | ArfGAP with FG<br>repeats 1(AGFG1)                      | NM_00450<br>4 | 160.9 | 183.1 | 0.0500 | 1.28 |
| NRAS  | neuroblastoma<br>RAS viral<br>oncogene<br>homolog(NRAS) | NM_00252<br>4 | 109   | 114.3 | 0.0500 | 1.15 |

## Supplementary Table 2: Pathways

|                                                      | <b>-log(p-value)</b> | <b>Ratio</b> | <b>End of Pathway</b> | <b>Direction</b> |
|------------------------------------------------------|----------------------|--------------|-----------------------|------------------|
| <b>Female IUGR Chow versus Female CON Chow</b>       |                      |              |                       |                  |
| <b>Oxidative Phosphorylation</b>                     | <b>4.330</b>         | <b>0.092</b> | <b>Y</b>              | <b>D</b>         |
| <b>Cell Cycle Control of Chromosomal Replication</b> | <b>4.030</b>         | <b>0.125</b> | <b>Y</b>              | <b>U</b>         |
| <b>LXR/RXR Activation</b>                            | <b>3.260</b>         | <b>0.074</b> | <b>y</b>              | <b>D</b>         |
| <b>Mitochondrial Function</b>                        | <b>2.760</b>         | <b>0.059</b> | <b>Y</b>              | <b>D</b>         |
| Sirtuin Signaling Pathway                            | 4.820                | 0.062        | N                     |                  |
| FXR/RXR Activation                                   | 4.500                | 0.087        | N                     |                  |
| Iron homeostasis signaling pathway                   | 3.500                | 0.073        | N                     |                  |
| EIF2 Signaling                                       | 3.300                | 0.057        | N                     |                  |
| Polyamine Regulation in Colon Cancer                 | 3.130                | 0.182        | N                     |                  |
| Extrinsic Prothrombin Activation Pathway             | 2.490                | 0.188        | N                     |                  |
| Clathrin-mediated Endocytosis Signaling              | 2.140                | 0.048        | N                     |                  |

## Male IUGR Chow versus Male CON Chow

|                                                                     |              |              |          |          |
|---------------------------------------------------------------------|--------------|--------------|----------|----------|
| <b>IGF-1 Signaling</b>                                              | <b>3.540</b> | <b>0.133</b> | <b>Y</b> | <b>D</b> |
| <b>PI3K/AKT Signaling</b>                                           | <b>3.390</b> | <b>0.124</b> | <b>Y</b> | <b>D</b> |
| <b>DNA Double-Strand Break Repair by Non-Homologous End Joining</b> | <b>2.460</b> | <b>0.286</b> | <b>Y</b> | <b>U</b> |
| <b>Role of BRCA1 in DNA Damage Response</b>                         | <b>2.350</b> | <b>0.125</b> | <b>Y</b> | <b>U</b> |
| <b>Toll-like Receptor Signaling</b>                                 | <b>2.010</b> | <b>0.118</b> | <b>Y</b> | <b>U</b> |
| PTEN Signaling                                                      | 4.150        | 0.138        | N        |          |
| Amyloid Processing                                                  | 3.920        | 0.196        | N        |          |
| Phosphatidylethanolamine Biosynthesis II                            | 3.280        | 0.444        | N        |          |
| p53 Signaling                                                       | 3.030        | 0.124        | N        |          |
| ERK5 Signaling                                                      | 2.830        | 0.145        | N        |          |
| PDGF Signaling                                                      | 2.640        | 0.122        | N        |          |
| 14-3-3-mediated Signaling                                           | 2.600        | 0.108        | N        |          |
| Protein Ubiquitination Pathway                                      | 2.590        | 0.089        | N        |          |
| FAK Signaling                                                       | 2.320        | 0.112        | N        |          |



|                              |       |       |   |
|------------------------------|-------|-------|---|
| p70S6K Signaling             | 2.170 | 0.100 | N |
| Endometrial Cancer Signaling | 2.170 | 0.125 | N |
| IL-2 Signaling               | 2.170 | 0.125 | N |
| Integrin Signaling           | 2.040 | 0.086 | N |
| Insulin Receptor Signaling   | 1.990 | 0.095 | N |

**Female CON HFCS Diet versus Chow Diet**

|                                                            |             |               |          |          |
|------------------------------------------------------------|-------------|---------------|----------|----------|
| <b>Hepatic Fibrosis / Hepatic Stellate Cell Activation</b> | <b>2.59</b> | <b>0.0374</b> | <b>Y</b> | <b>U</b> |
| <b>Acute Phase Response Signaling</b>                      | <b>2.09</b> | <b>0.0341</b> | <b>Y</b> | <b>D</b> |
| LXR/RXR Activation                                         | 6.47        | 0.0826        | N        |          |
| FXR/RXR Activation                                         | 5.35        | 0.0714        | N        |          |
| GP6 Signaling Pathway                                      | 5.13        | 0.0672        | N        |          |
| Atherosclerosis Signaling                                  | 4.42        | 0.063         | N        |          |
| Intrinsic Prothrombin Activation Pathway                   | 4.25        | 0.119         | N        |          |
| Apelin Liver Signaling Pathway                             | 2.68        | 0.115         | N        |          |

**Female IUGR HFCS Diet versus Chow Diet**

|                                                   |             |               |          |          |
|---------------------------------------------------|-------------|---------------|----------|----------|
| <b>EIF2 Signaling</b>                             | <b>13</b>   | <b>0.115</b>  | <b>Y</b> | <b>D</b> |
| <b>mTOR Signaling</b>                             | <b>8.86</b> | <b>0.0971</b> | <b>Y</b> | <b>D</b> |
| <b>Regulation of eIF4 and p70S6K Signaling</b>    | <b>8.09</b> | <b>0.104</b>  | <b>Y</b> | <b>D</b> |
| <b>PI3K/AKT Signaling</b>                         | <b>3.19</b> | <b>0.0692</b> | <b>Y</b> | <b>D</b> |
| <b>p70S6K Signaling</b>                           | <b>2.41</b> | <b>0.058</b>  | <b>Y</b> | <b>D</b> |
| <b>Gap Junction Signaling</b>                     | <b>2.4</b>  | <b>0.0498</b> | <b>Y</b> | <b>D</b> |
| <b>PTEN Signaling</b>                             | <b>2.11</b> | <b>0.0565</b> | <b>Y</b> | <b>D</b> |
| Adrenomedullin signaling pathway                  | 2.94        | 0.055         | N        |          |
| D-myo-inositol (1,4,5)-Trisphosphate Biosynthesis | 2.86        | 0.148         | N        |          |
| ERK5 Signaling                                    | 2.73        | 0.0845        | N        |          |
| DNA damage-induced 14-3-3 $\sigma$ Signaling      | 2.33        | 0.158         | N        |          |
| AMPK Signaling                                    | 2.19        | 0.0463        | N        |          |
| RhoA Signaling                                    | 2.11        | 0.0565        | N        |          |
| Endocannabinoid Developing Neuron Pathway         | 2.06        | 0.0551        | N        |          |
| <b>Male CON HFCS Diet versus Chow Diet</b>        |             |               |          |          |
| <b>Integrin Signaling</b>                         | <b>3.63</b> | <b>0.0731</b> | <b>Y</b> | <b>U</b> |
| <b>Actin Cytoskeleton Signaling</b>               | <b>3.33</b> | <b>0.0687</b> | <b>Y</b> | <b>U</b> |
| <b>PTEN Signaling</b>                             | <b>2.79</b> | <b>0.0806</b> | <b>Y</b> | <b>U</b> |

|                                                                  |             |               |          |          |
|------------------------------------------------------------------|-------------|---------------|----------|----------|
| <b>Cholesterol Biosynthesis I</b>                                | <b>2.37</b> | <b>0.231</b>  | <b>Y</b> | <b>U</b> |
| <b>Cholesterol Biosynthesis II (via 24,25-dihydrolanosterol)</b> | <b>2.37</b> | <b>0.231</b>  | <b>Y</b> | <b>U</b> |
| <b>Cholesterol Biosynthesis III (via Desmosterol)</b>            | <b>2.37</b> | <b>0.231</b>  | <b>Y</b> | <b>U</b> |
| <b>ILK Signaling</b>                                             | <b>2.22</b> | <b>0.0609</b> | <b>Y</b> | <b>U</b> |
| <b>FAK Signaling</b>                                             | <b>2.19</b> | <b>0.0762</b> | <b>Y</b> | <b>U</b> |
| Amyloid Processing                                               | 2.68        | 0.118         | N        |          |
| Cellular Effects of Sildenafil (Viagra)                          | 2.62        | 0.0763        | N        |          |
| NRF2-mediated Oxidative Stress Response                          | 2.6         | 0.065         | N        |          |
| Adrenomedullin signaling pathway                                 | 2.6         | 0.065         | N        |          |
| Germ Cell-Sertoli Cell Junction Signaling                        | 2.55        | 0.067         | N        |          |
| Corticotropin Releasing Hormone Signaling                        | 2.43        | 0.0719        | N        |          |
| RAR Activation                                                   | 2.34        | 0.0632        | N        |          |
| Serotonin Receptor Signaling                                     | 2.29        | 0.116         | N        |          |
| Melanocyte Development and Pigmentation Signaling                | 2.24        | 0.0777        | N        |          |
| Wnt/ $\beta$ -catenin Signaling                                  | 2.23        | 0.064         | N        |          |

|                                           |      |        |   |
|-------------------------------------------|------|--------|---|
| IL-8 Signaling                            | 2.12 | 0.0591 | N |
| Molecular Mechanisms of Cancer            | 2.07 | 0.0482 | N |
| p53 Signaling                             | 2.05 | 0.0721 | N |
| IGF-1 Signaling                           | 2.05 | 0.0721 | N |
| Regulation of Actin-based Motility by Rho | 2.02 | 0.0778 | N |

### **Male IUGR HFCS Diet versus Chow Diet**

|                                             |             |              |          |          |
|---------------------------------------------|-------------|--------------|----------|----------|
| <b>Mitochondrial Function</b>               | <b>2.44</b> | <b>0.076</b> | <b>Y</b> | <b>U</b> |
| <b>Assembly of RNA Polymerase I Complex</b> | <b>2.23</b> | <b>0.25</b>  | <b>Y</b> | <b>D</b> |
| RAR Activation                              | 2.46        | 0.0737       | N        |          |
| Protein Ubiquitination Pathway              | 2.25        | 0.0642       | N        |          |
| CDK5 Signaling                              | 2.17        | 0.0857       | N        |          |

**Supplementary Table 2:  
Pathways**

|                                                      | <b>Molecules</b>                                                                                                              |
|------------------------------------------------------|-------------------------------------------------------------------------------------------------------------------------------|
| <b>Female IUGR Chow versus Female CON Chow</b>       |                                                                                                                               |
| <b>Oxidative Phosphorylation</b>                     | <b>SDHA,ATP5PF,NDUFB11,ATP5F1D,NDUFA11,UQCRFS1,NDUFB8,COX7A1,NDUFA1,COX4I1</b>                                                |
| <b>Cell Cycle Control of Chromosomal Replication</b> | <b>CDK12,CDK18,CDC45,CDC6,RPA1,MCM7,ORC1</b>                                                                                  |
| <b>LXR/RXR Activation</b>                            | <b>APOE,HPX,TTR,ALB,SREBF1,APOA2,GC,FGA,PON3</b>                                                                              |
| <b>Mitochondrial Function</b>                        | <b>SDHA,ATP5PF,NDUFB11,ATP5F1D,NDUFA11,UQCRFS1,NDUFB8,COX7A1,NDUFA1,COX4I1</b>                                                |
| <b>Sirtuin Signaling Pathway</b>                     | ATP5PF,PPARA,SDHA,SLC25A4,ATP5F1D,TIMM9,ATG4B,GLUD1,NDUFB8,TIMM23,NDUFA1,PFKM,NDUFB11,GADD45A,SREBF1,NDUFA11,UQCRFS1,GO<br>T2 |
| <b>FXR/RXR Activation</b>                            | PPARA,APOE,HPX,TTR,ALB,SREBF1,APOA2,AKT3,GC,FGA,PON3                                                                          |
| <b>Iron homeostasis signaling pathway</b>            | ATP6V1E1,HAMP,HPX,PDGFA,ATP6V0D1,CIAO2B,CIAO2A,ATP6V0E1,PDGFB,SKP2                                                            |
| <b>EIF2 Signaling</b>                                | RPS6,RPL32,RPL14,RPS15,EIF1,RPS3A,SREBF1,RPLP2,AKT3,RPS21,PPP1CA,RPL36,EIF3M                                                  |
| <b>Polyamine Regulation in Colon Cancer</b>          | PSMF1,MXD1,PSMB11,ODC1                                                                                                        |
| <b>Extrinsic Prothrombin Activation Pathway</b>      | SERPINC1,FGA,FGG                                                                                                              |
| <b>Clathrin-mediated Endocytosis Signaling</b>       | APOE,AP2M1,ALB,ACTR3,FGF18,PDGFA,APOA2,MDM2,UBC,PDGFB                                                                         |

**Male IUGR Chow versus  
Male CON Chow**

|                                                                     |                                                                                                                                                           |
|---------------------------------------------------------------------|-----------------------------------------------------------------------------------------------------------------------------------------------------------|
| <b>IGF-1 Signaling</b>                                              | <b>RAP2B,NEDD4,CSNK2A1,NRAS,CTGF,MAP2K2,YWHAE,YWHAB,PIK3R1,FOXO3,PIK3R6,PDPK1,SOCS4,CSNK2B,TLR9</b>                                                       |
| <b>PI3K/AKT Signaling</b>                                           | <b>RAP2B,TSC1,NRAS,YWHAE,YWHAB,PIK3R1,ITGA2,PDPK1,BCL2,SYNJ1,MAP2K2,LIMS1,FOXO3,INPP5K,GSK3B,ITGA4</b>                                                    |
| <b>DNA Double-Strand Break Repair by Non-Homologous End Joining</b> | <b>PRKDC,WRN,XRCC5,LIG3</b>                                                                                                                               |
| <b>Role of BRCA1 in DNA Damage Response</b>                         | <b>FANCE,PBRM1,BRD7,POU2F1,RFC4,FANCG,BARD1,MDC1,UIMC1,SMARCC2</b>                                                                                        |
| <b>Toll-like Receptor Signaling</b>                                 | <b>TLR2,TLR10,TICAM1,TLR8,MAP3K7,EIF2AK2,MAPK13,TLR9,UBC</b>                                                                                              |
| <b>PTEN Signaling</b>                                               | <b>RAP2B,CSNK2A1,NRAS,PIK3R1,ITGA2,FLT4,PDPK1,BCL2,SYNJ1,MAP2K2,SI RT6,NGFR,FOXO3,GSK3B,CSNK2B,INPP5K,ITGA4</b>                                           |
| <b>Amyloid Processing</b>                                           | <b>CSNK1E,CAPN5,CSNK2A1,PSENEN,APH1A,CSNK1A1,GSK3B,CSNK2B,MAPK13,CDK5R1</b>                                                                               |
| <b>Phosphatidylethanolamine Biosynthesis II</b>                     | <b>ETNK2,CEPT1,PCYT2,CHKA</b>                                                                                                                             |
| <b>p53 Signaling</b>                                                | <b>PRKDC,MED1,PLAGL1,PIK3R1,TNFRSF10B,TLR9,BIRC5,TP53BP2,BCL2,CASP6,PIK3R6,ADGRB1,GSK3B,PML</b>                                                           |
| <b>ERK5 Signaling</b>                                               | <b>RAP2B,NRAS,YWHAE,YWHAB,CREB1,FOXO3,GNAQ,MEF2A,MEF2C,WNK1</b>                                                                                           |
| <b>PDGF Signaling</b>                                               | <b>RAP2B,CSNK2A1,NRAS,MAP2K2,SYNJ1,PDGFA,PIK3R1,PIK3R6,EIF2AK2,CSNK2B,INPP5K,TLR9</b>                                                                     |
| <b>14-3-3-mediated Signaling</b>                                    | <b>RAP2B,TSC1,TUBB3,NRAS,YWHAE,YWHAB,PIK3R1,NOTUM,TLR9,TUBB2B,SRPK2,MAP2K2,PIK3R6,TUBB4A,GSK3B</b>                                                        |
| <b>Protein Ubiquitination Pathway</b>                               | <b>NEDD4,PSMD9,HSPA9,TRAP1,UBE2Z,FBXW7,USP19,USP1,THOP1,UBE2O,DNAJB14,USP33,SKP2,USP3,PSME1,UBE2D2,USP16,UBE2E3,ANAPC11,UBC,USP49,UBE2D3,UBE2Q2,BIRC2</b> |
| <b>FAK Signaling</b>                                                | <b>CAPN5,RAP2B,NRAS,ARHGAP26,MAP2K2,ARHGEF7,PIK3R1,ITGA2,PIK3R6,PDPK1,TLR9,ITGA4</b>                                                                      |

|                              |                                                                                                                           |
|------------------------------|---------------------------------------------------------------------------------------------------------------------------|
| p70S6K Signaling             | RAP2B,IL2RG,NRAS,YWHAE,F2R,YWHAB,EEF2,PIK3R1,NOTUM,GNAQ,PDPK1,TLR9,MAP2K2,PIK3R6                                          |
| Endometrial Cancer Signaling | RAP2B,NRAS,MAP2K2,PIK3R1,FOXO3,PIK3R6,PDPK1,GSK3B,TLR9                                                                    |
| IL-2 Signaling               | RAP2B,CSNK2A1,IL2RG,NRAS,MAP2K2,PIK3R1,PIK3R6,CSNK2B,TLR9                                                                 |
| Integrin Signaling           | RAP2B,CAPN5,RAPGEF1,ARHGAP26,NRAS,ARF1,ARHGEF7,PIK3R1,ITGA2,MYLK,TLR9,PPP1R12B,MAP2K2,RND3,LIMS1,PIK3R6,GSK3B,ITGB4,ITGA4 |
| Insulin Receptor Signaling   | RAP2B,RAPGEF1,TSC1,NRAS,EIF2B4,PIK3R1,PDPK1,TLR9,SYNJ1,MAP2K2,FOXO3,PIK3R6,INPP5K,GSK3B                                   |

**Female CON HFCS Diet versus Chow Diet**

**Hepatic Fibrosis / Hepatic Stellate Cell Activation Acute Phase Response Signaling**

|                                          |                                                          |
|------------------------------------------|----------------------------------------------------------|
| LXR/RXR Activation                       | SCD,HPX,ALB,ORM1,CD36,FASN,PCYOX1,PLTP,GC,PON3           |
| FXR/RXR Activation                       | PPARG,HPX,ALB,ORM1,FASN,PCYOX1,PLTP,GC,PON3              |
| GP6 Signaling Pathway                    | COL1A2,COL5A1,COL1A1,COL6A3,COL6A2,FGB,COL6A5,FGG,COL3A1 |
| Atherosclerosis Signaling                | COL1A2,COL1A1,ALB,PLA2G2E,ORM1,CD36,PCYOX1,COL3A1        |
| Intrinsic Prothrombin Activation Pathway | COL1A2,COL1A1,FGB,FGG,COL3A1                             |
| Apelin Liver Signaling Pathway           | COL1A2,COL1A1,COL3A1                                     |

**Female IUGR HFCS Diet versus Chow Diet**

|                                                   |                                                                                                                                                             |
|---------------------------------------------------|-------------------------------------------------------------------------------------------------------------------------------------------------------------|
| <b>EIF2 Signaling</b>                             | EIF2B4,RPS3A,PDPK1,RPL7A,RPS4X,RPL7,BCL2,RPS7,PPP1CC,AKT1,EIF4G2,AKT3,RPL36,RPL36AL,ACTB,RPS8,RPS10,RPL23,RPS21,RPL10A,EIF3M,RPS15,RPS27A,RPS15A,RPL6,RPS14 |
| <b>mTOR Signaling</b>                             | RHEB,RPS3A,STK11,RPS8,RPS10,PDPK1,RPS21,RPS4X,EIF3M,RPS7,RPS15,AKT1,EIF4G2,PTPA,AKT3,RPS27A,RPS15A,GNB1L,EIF4B,RPS14                                        |
| <b>Regulation of eIF4 and p70S6K Signaling</b>    | EIF2B4,RPS3A,RPS8,RPS10,PDPK1,RPS21,RPS4X,EIF3M,RPS7,RPS15,AKT1,EIF4G2,PTPA,AKT3,RPS27A,RPS15A,RPS14                                                        |
| <b>PI3K/AKT Signaling</b>                         | RHEB,AKT1,YWHAH,PTPA,AKT3,PDPK1,HSP90AA1,JAK3,BCL2                                                                                                          |
| <b>p70S6K Signaling</b>                           | PLCD1,AKT1,YWHAH,PTPA,EEF2,PDPK1,AKT3,PLCD4                                                                                                                 |
| <b>Gap Junction Signaling</b>                     | PLCD1,TUBA1A,AKT1,SP3,ACTB,CSNK1G3,AKT3,MAPK7,PLCD4,MAP2K5                                                                                                  |
| <b>PTEN Signaling</b>                             | AKT1,YWHAH,FLT4,AKT3,PDPK1,FASLG,BCL2                                                                                                                       |
| Adrenomedullin signaling pathway                  | PLCD1,CRCP,IL18,AKT1,MAX,AKT3,MAPK7,PLCD4,RAMP2,MAP2K5,BCL2                                                                                                 |
| D-myo-inositol (1,4,5)-Trisphosphate Biosynthesis | PLCD1,PIP4K2B,PLCD4,PI4KA                                                                                                                                   |
| ERK5 Signaling                                    | IL6ST,AKT1,YWHAH,CREB1,MAPK7,MAP2K5                                                                                                                         |
| DNA damage-induced 14-3-3 $\sigma$ Signaling      | AKT1,RAD9A,AKT3                                                                                                                                             |
| AMPK Signaling                                    | AKT1,PTPA,EEF2,ACTB,STK11,CREB1,AKT3,PDPK1,SMARCD1,GNB1L                                                                                                    |
| RhoA Signaling                                    | NGEF,ACTR3,ACTB,BAIAP2,PIP4K2B,ARHGAP1,PI4KA                                                                                                                |
| Endocannabinoid Developing Neuron Pathway         | AKT1,CREB1,AKT3,MAPK7,GNG5,GNB1L,MAP2K5                                                                                                                     |
| <b>Male CON HFCS Diet versus Chow Diet</b>        |                                                                                                                                                             |
| <b>Integrin Signaling</b>                         | ITGB1,ARHGAP26,MPRIP,ILK,MYLK,CRK,RAC3,MYL9,PTK2,CAPNS1,MAP2K2,RHOT1,TSPAN1,FGFR4,PFN2,VCL                                                                  |
| <b>Actin Cytoskeleton Signaling</b>               | PTK2,MYL9,ITGB1,MYH10,MPRIP,MAP2K2,F2R,PDGFA,FGFR4,FGF12,PFN2,MYLK,CRK,VCL,RAC3,FGF13                                                                       |
| <b>PTEN Signaling</b>                             | ITGB1,PTK2,CSNK2A1,SHARPIN,MAP2K2,FGFR4,FLT4,FOXO3,ILK,RAC3                                                                                                 |



|                                                                      |                                                                                                |
|----------------------------------------------------------------------|------------------------------------------------------------------------------------------------|
| <b>Cholesterol Biosynthesis I</b>                                    | <b>SQLE,DHCR7,MSMO1</b>                                                                        |
| <b>Cholesterol Biosynthesis II<br/>(via 24,25-dihydrolanosterol)</b> | <b>SQLE,DHCR7,MSMO1</b>                                                                        |
| <b>Cholesterol Biosynthesis III<br/>(via Desmosterol)</b>            | <b>SQLE,DHCR7,MSMO1</b>                                                                        |
| <b>ILK Signaling</b>                                                 | <b>ITGB1,MYL9,PTK2,FOS,MYH10,RHOT1,FGFR4,PPP2R2B,ILK,VCL,PTGS2,HIF1A</b>                       |
| <b>FAK Signaling</b>                                                 | <b>ITGB1,PTK2,ARHGAP26,CAPNS1,MAP2K2,FGFR4,CRK,VCL</b>                                         |
| Amyloid Processing                                                   | CSNK1E,CSNK2A1,CAPNS1,PRKAR2A,APP,PSEN1                                                        |
| Cellular Effects of Sildenafil<br>(Viagra)                           | MYL9,CALM1 (includes others),MYH10,ADCY9,MPRIIP,ADCY6,PRKAR2A,MYLK,KCNH2,GUCY1B1               |
| NRF2-mediated Oxidative<br>Stress Response                           | FOS,AKR7A3,MAP2K2,FGFR4,GSTM4,SLC35A2,JUND,DNAJC10,DNAJB6,UBE2E3,JUNB,FKBP5,ABCC4              |
| Adrenomedullin signaling<br>pathway                                  | PTK2,ADCY9,FOS,CALM1 (includes others),MAP2K2,FGFR4,ADCY6,PRKAR2A,MYLK,CFH,HIF1A,KCNH2,GUCY1B1 |
| Germ Cell-Sertoli Cell<br>Junction Signaling                         | ITGB1,PTK2,TUBB6,MAP2K2,RHOT1,FGFR4,ILK,TUBB4A,VCL,RAC3,MAP3K3,CTNND1                          |
| Corticotropin Releasing<br>Hormone Signaling                         | FOS,CALM1 (includes others),ADCY9,MAP2K2,ADCY6,PRKAR2A,JUND,PTGS2,CACNA2D4,GUCY1B1             |
| RAR Activation                                                       | FOS,ADCY9,ADH7,LRAT,CSNK2A1,RARB,ADCY6,PRKAR2A,PML,STAT5B,RBP1,PRMT1                           |
| Serotonin Receptor Signaling                                         | ADCY9,HTR2B,SMOX,HTR3A,ADCY6                                                                   |
| Melanocyte Development and<br>Pigmentation Signaling                 | KITLG,ADCY9,MAP2K2,FGFR4,RPS6KA3,ADCY6,PRKAR2A,CRK                                             |
| Wnt/ $\beta$ -catenin Signaling                                      | CSNK1E,SOX4,CSNK2A1,APPL2,DKK3,CSNK1G3,MARK2,PPP2R2B,RARB,ILK,FZD1                             |

|                                             |                                                                                                             |
|---------------------------------------------|-------------------------------------------------------------------------------------------------------------|
| IL-8 Signaling                              | RAB11FIP2,MYL9,PTK2,FOS,ANGPT2,NAPEPLD,MAP2K2,RHOT1,FGFR4,FLT4,PTGS2,RAC3                                   |
| Molecular Mechanisms of Cancer              | ITGB1,HAT1,PRKAR2A,ADCY6,CRK,HIF1A,FZD1,RAC3,PTK2,ADCY9,FOS,CASP6,GADD45B,STAG1,FGFR4,ADGRB1,HIF1A,PML,ST13 |
| p53 Signaling                               | CASP6,GADD45B,STAG1,FGFR4,ADGRB1,HIF1A,PML,ST13                                                             |
| IGF-1 Signaling                             | PTK2,FOS,CSNK2A1,MAP2K2,FGFR4,FOXO3,PRKAR2A,SOCS5                                                           |
| Regulation of Actin-based Motility by Rho   | ITGB1,MYL9,MPRIIP,RHOT1,PFN2,MYLK,RAC3                                                                      |
| <b>Male IUGR HFCS Diet versus Chow Diet</b> |                                                                                                             |
| <b>Mitochondrial Function</b>               | <b>GSR,PDHA1,ATP5PF,NDUFB11,NDUFA9,APH1A,MAPK10,COX5A,NDUFA12,UQCR11,ATP5S,BCL2,UQCRB</b>                   |
| <b>Assembly of RNA Polymerase I Complex</b> | <b>TAF1C,TBP,UBTF</b>                                                                                       |
| RAR Activation                              | PBRM1,RDH10,ADCY6,PDPK1,SMARCD1,SMARCD3,ADH7,IGFBP3,MAPK10,SORBS3,CSNK2B,ADCY10,PML,SMAD1                   |
| Protein Ubiquitination Pathway              | PSMD9,HSPA6,UBE2V2,FBXW7,PSMD3,DNAJA1,DNAJB14,UBE2D2,PSME1,UBE2B,PSMC6,PSMB2,USP16,USP47,ANAPC5,UBE2E3,UBC  |
| CDK5 Signaling                              | GNAS,PPP2R3A,PPP2CA,ADCY6,MAPK10,PPP2R2C,MAPK7,ADCY10,GNAL                                                  |

### Supplementary Table 3: Causal Networks

| Upstream Regulator                           | Expr Fold Change | Molecule Type                     | Predicted Activation State | Activation z-score | p-value of overlap | Target Molecules in Dataset                                             |
|----------------------------------------------|------------------|-----------------------------------|----------------------------|--------------------|--------------------|-------------------------------------------------------------------------|
| <b>Female IUGR Chow vs Female CON Chow</b>   |                  |                                   |                            |                    |                    |                                                                         |
| RB1                                          | 1.152            | transcription regulator           | Inhibited                  | -2.358             | 3.65E-03           | CDC6,CLDN3,COX4I1,EI24,HSBP1,MC<br>M7,MRPL11,MRPL53,MYL6B,NDUF<br>B8    |
| HOXA10                                       |                  | transcription regulator           | Activated                  | 2                  | 4.76E-02           | APOE,CYBB,HOXA11,KLF10,NDRG2                                            |
| <b>Male IUGR Chow vs Male CON Chow</b>       |                  |                                   |                            |                    |                    |                                                                         |
| None                                         |                  |                                   |                            |                    |                    |                                                                         |
| <b>Female CON HFCS Diet versus Chow Diet</b> |                  |                                   |                            |                    |                    |                                                                         |
| MED13                                        | -1.03            | transcription regulator           | Inhibited                  | -2.236             | 3.35E-09           | CD36,CIDEA,CIDEC,FASN,GPD1,PPA<br>RG,SCD,THRSP                          |
| AHR                                          | 1.166            | ligand-dependent nuclear receptor | Inhibited                  | -2.284             | 2.33E-07           | CDKN2C,COL1A1,COL1A2,COL3A1,<br>COL5A1,COL6A3,FABP4,FBLN2,GAS<br>1,GPAM |
| FBXW7                                        | -1.044           | enzyme                            | Inhibited                  | -2.216             | 1.00E-06           | CD36,CIDEC,FABP4,GPAM,HSPE1,P<br>PARG                                   |
| HAND2                                        |                  | transcription regulator           | Inhibited                  | -2.213             | 6.05E-05           | COL1A1,COL1A2,COL3A1,ECM2,FAP                                           |
| TBX5                                         |                  | transcription regulator           | Inhibited                  | -2.213             | 8.48E-05           | COL1A1,COL1A2,COL3A1,ECM2,FAP                                           |
| EOMES                                        | 1.002            | transcription regulator           | Inhibited                  | -2                 | 4.54E-04           | ANXA1,COL3A1,COL6A3,PMP22,SOX<br>2                                      |
| MYOCD                                        | 1.032            | transcription regulator           | Inhibited                  | -2.213             | 6.86E-04           | COL1A1,COL1A2,COL3A1,ECM2,FAP                                           |
| GATA4                                        | 1.081            | transcription regulator           | Inhibited                  | -2.213             | 2.80E-03           | COL1A1,COL1A2,COL3A1,CTHRC1,E<br>CM2,FAP                                |
| SPDEF                                        |                  | transcription regulator           | Inhibited                  | -2                 | 3.67E-03           | COL1A1,COL5A1,COL6A2,COL6A3                                             |

|         |        |                                   |           |       |          |                                                                      |
|---------|--------|-----------------------------------|-----------|-------|----------|----------------------------------------------------------------------|
| PPARA   | -1.069 | ligand-dependent nuclear receptor | Activated | 2.453 | 5.43E-09 | CD36,CDKN2C,CEACAM1,CIDEA,CIDEA,DEC,ELOVL5,FABP4,FABP5,FASN,FG B     |
| IGF2BP1 | -1.232 | translation regulator             | Activated | 2.449 | 1.58E-08 | COL1A1,COL1A2,COL5A1,COL6A2,COL6A3,LGALS1                            |
| SREBF1  | -1.086 | transcription regulator           | Activated | 2.928 | 1.36E-07 | ACLY,ALDOC,CIDEA,FABP5,FASN,GCK,GPAM,NSDHL,PLTP,PMP22                |
| PPARG   | 2.294  | ligand-dependent nuclear receptor | Activated | 2.959 | 2.41E-07 | ACLY,AGPAT2,CAV1,CAV2,CD36,CIDEA,CIDEC,COL1A1,COL1A2,FABP4           |
| KLF15   | 1.118  | transcription regulator           | Activated | 2.355 | 1.69E-06 | CD36,FABP5,FASN,GPAM,PPARG,SCD                                       |
| SREBF2  | -1.001 | transcription regulator           | Activated | 2.599 | 2.82E-06 | ACLY,ALDOC,FABP5,FASN,NSDHL,SCD,THRSP                                |
| TP53    | 1.075  | transcription regulator           | Activated | 2.719 | 1.46E-05 | ACLY,ANXA1,ANXA8/ANXA8L1,CAV1,CAV2,COL1A1,COL1A2,COL3A1,COL6A2,FABP4 |
| NR1I2   |        | ligand-dependent nuclear receptor | Activated | 2.104 | 1.20E-02 | CD36,FASN,GSTM5,PPARG,SCD                                            |

#### Female IUGR HFCS Diet versus Chow Diet

|         |        |                         |           |       |          |                                                        |
|---------|--------|-------------------------|-----------|-------|----------|--------------------------------------------------------|
| SMARCA4 | -1.095 | transcription regulator | Activated | 2.111 | 3.54E-02 | ARL16,CDK20,CLK1,GPX1,HNMT,HYI,ITGA7,KHDRBS3,MAFF,MT1H |
|---------|--------|-------------------------|-----------|-------|----------|--------------------------------------------------------|

#### Male CON HFCS Diet versus Chow Diet

|       |        |                                   |           |       |          |                                                             |
|-------|--------|-----------------------------------|-----------|-------|----------|-------------------------------------------------------------|
| CREB1 | 1.188  | transcription regulator           | Activated | 2.159 | 3.45E-04 | AVP,CH25H,FOS,GADD45B,INHA,JUNB,MSMO1,PSEN1,PTGS2,RHEB      |
| AR    | -1.297 | ligand-dependent nuclear receptor | Activated | 2.092 | 7.49E-03 | ABCC4,AMD1,CALU,CCDC85B,CCT3,CLDN11,CLSTN1,DHCR7,DSC2,FKBP5 |
| CREM  |        | transcription regulator           | Activated | 2.207 | 1.21E-02 | CH25H,FOS,GADD45B,INHA,JUNB,MSMO1,SERTAD1,SPTY2D1           |

|                                             |        |                         |           |        |          |                                                        |
|---------------------------------------------|--------|-------------------------|-----------|--------|----------|--------------------------------------------------------|
| SMAD3                                       |        | transcription regulator | Activated | 2.916  | 1.84E-02 | FOS,INHA,ITGB1,JUNB,JUND,mir-21,PTGS2,TBX3,TNC         |
| SRF                                         | 1.216  | transcription regulator | Activated | 2.195  | 3.12E-02 | CAPRIN1,EIF6,FHL2,FOS,ITGB1,JUNB,MYL9,MYLK,PTGS2,TAGLN |
| <b>Male IUGR HFCS Diet versus Chow Diet</b> |        |                         |           |        |          |                                                        |
| PARP1                                       | -1.867 | enzyme                  | Inhibited | -2.588 | 3.09E-02 | GBP6,ICAM1,OPRM1,POU2F1,TGFA,TLR9,TNFRSF10B            |

**Supplementary Table 4. Normalized and transformed values of identified metabolites F=female, M=male, CON**

| <b>Metabolite</b>                                               | <b>Unique mass</b> | <b>RT_dim1(sec)</b> | <b>RT_dim2(sec)</b> | <b>F1_CON_0</b> | <b>F2_CON_0</b> |
|-----------------------------------------------------------------|--------------------|---------------------|---------------------|-----------------|-----------------|
| Pentanoic acid, trimethylsilyl ester                            | 75                 | 590                 | 1.33                | 20340           | 2250            |
| Decane                                                          | 57                 | 630                 | 1.18                | 5930            | 6970            |
| Decanoic acid, trimethylsilyl ester                             | 147                | 635                 | 1.05                | 300             | 380             |
| Benzene, 1,2,3-trimethyl-                                       | 105                | 640                 | 1.99                | 900             | 1210            |
| Ethanedioic acid, bis(trimethylsilyl) ester                     | 147                | 645                 | 1.11                | 1200            | 2030            |
| Indane                                                          | 117                | 655                 | 2.22                | 330             | 440             |
| 3-t-Pentylcyclopentanone                                        | 69                 | 670                 | 1.25                | #N/A            | #N/A            |
| 2-Hepten-4-one, 6-methyl-                                       | 69                 | 680                 | 1.29                | #N/A            | #N/A            |
| Tridecane                                                       | 57                 | 685                 | 1.18                | 750             | 470             |
| Benzene, 2-ethyl-1,4-dimethyl-/Benzene, 4-ethyl-1,2-dimethyl-   | 119                | 700                 | 1.88                | 1790            | 2240            |
| 2H-Pyran-2-one, tetrahydro-6-methyl-                            | 42                 | 700                 | 4.4                 | 1430            | 1680            |
| 2,4,6,8-Tetramethyl-1-undecene                                  | 57                 | 720                 | 1.2                 | 1220            | 1070            |
| N,N-Dimethyloctylamine/3-Buten-1-amine, N,N-dimethyl-           | 58                 | 790                 | 1.39                | 920             | 1280            |
| Propanoic acid, 2-oxo-3-(trimethylsilyl)-, trimethylsilyl ester | 119                | 795                 | 2.02                | #N/A            | #N/A            |
| Heptanoic acid, trimethylsilyl ester                            | 75                 | 890                 | 1.49                | 1220            | 980             |
| 2-Methoxyphenol trimethylsilyl ether                            | 166                | 970                 | 2.11                | 1230            | 1010            |
| Urea, N,N'-bis(trimethylsilyl)-                                 | 147                | 990                 | 1.98                | 260             | 460             |
| 3-Ethylphenol, trimethylsilyl ether                             | 179                | 995                 | 1.82                | 1000            | 880             |
| Benzeneacetic acid, trimethylsilyl ester                        | 73                 | 1075                | 2.28                | 41110           | 61820           |
| 1,2-Benzenediol bis(trimethylsilyl) ether                       | 73                 | 1135                | 1.64                | 1640            | 4010            |
| 3-Octenoic acid, trimethylsilyl ester                           | 73                 | 1190                | 1.61                | #N/A            | 750             |
| 4-Methylcatechol, bis(trimethylsilyl) ether                     | 73                 | 1255                | 1.61                | #N/A            | #N/A            |
| Benzenepropanoic acid, trimethylsilyl ester                     | 104                | 1265                | 2.22                | 3300            | 3860            |
| Mercaptoacetic acid, bis(trimethylsilyl)-                       | 73                 | 1330                | 0.97                | #N/A            | #N/A            |

|                                                                                                                                              |     |      |      |       |       |
|----------------------------------------------------------------------------------------------------------------------------------------------|-----|------|------|-------|-------|
| Benzenepropanoic acid, 4-[(trimethylsilyl)oxy]- $\ddagger$ -<br>[[trimethylsilyl]oxy]imino]-, trimethylsilyl ester                           | 75  | 1350 | 1.52 | #N/A  | #N/A  |
| Benzoic acid, 2-[(trimethylsilyl)oxy]-,<br>trimethylsilyl ester                                                                              | 73  | 1420 | 1.91 | 1700  | 900   |
| Trimethylsilyl 2,4-dichlorobenzoate                                                                                                          | 173 | 1460 | 2.28 | 1140  | 1230  |
| Benzenepropanoic acid, $\ddagger$ -[(trimethylsilyl)oxy]-,<br>trimethylsilyl ester                                                           | 73  | 1530 | 1.78 | 1010  | 430   |
| 3-Phenyl-3-trimethylsilyloxypropanoic acid,<br>trimethylsilyl ester                                                                          | 73  | 1545 | 1.75 | 380   | 710   |
| Benzeneacetic acid, 3-[(trimethylsilyl)oxy]-,<br>trimethylsilyl ester/Benzeneacetic acid, 4-<br>[(trimethylsilyl)oxy]-, trimethylsilyl ester | 73  | 1595 | 1.94 | 640   | 740   |
| 3-Phenyl-3-(trimethylsilyloxy)butan-2-one                                                                                                    | 73  | 1605 | 1.84 | 400   | 460   |
| Dodecanoic acid, trimethylsilyl ester                                                                                                        | 75  | 1620 | 1.55 | 280   | 130   |
| Benzene, 1,2,3,4-tetramethyl-                                                                                                                | 73  | 1685 | 2.18 | #N/A  | #N/A  |
| 1-Pentadecanamine, N,N-dimethyl-                                                                                                             | 58  | 1690 | 1.53 | 5930  | 13880 |
| 1-Octanamine, N-methyl-N-octyl-                                                                                                              | 58  | 1725 | 1.5  | 890   | 1450  |
| n-Tridecanoic acid, trimethylsilyl ester                                                                                                     | 73  | 1750 | 1.54 | #N/A  | 100   |
| Azelaic acid, bis(trimethylsilyl) ester                                                                                                      | 75  | 1800 | 1.72 | 1110  | 1710  |
| Glycine, N-benzoyl-, trimethylsilyl ester                                                                                                    | 105 | 1815 | 3.26 | 2940  | 4900  |
| Benzenepropanoic acid, 3-methoxy-<br>4[(trimethylsilyl)oxy]-, trimethylsilyl ester                                                           | 73  | 1910 | 2.1  | 2130  | 940   |
| n-Pentadecanoic acid, trimethylsilyl ester                                                                                                   | 75  | 1945 | 1.53 | 140   | 240   |
| 1H-Indole-3-acetic acid, 1-(trimethylsilyl)-,<br>trimethylsilyl ester                                                                        | 202 | 1975 | 2.7  | 30360 | 36110 |
| Dodecanedioic acid, bis(trimethylsilyl) ester                                                                                                | 73  | 1980 | 1.61 | 10    | 2730  |
| 1,11-Undecanedioic acid, di(trimethylsilyl) ester                                                                                            | 73  | 2030 | 1.72 | 450   | 660   |
| 1H-Indole-3-propanoic acid, 1-(trimethylsilyl)-,<br>trimethylsilyl ester                                                                     | 73  | 2115 | 2.52 | 400   | 580   |
| N-Methyl-N-benzyltetradecanamine                                                                                                             | 91  | 2155 | 2.04 | 190   | 220   |

|                                                              |     |      |      |        |        |
|--------------------------------------------------------------|-----|------|------|--------|--------|
| L-Tryptophan, N,1-bis(trimethylsilyl)-, trimethylsilyl ester | 73  | 2235 | 2.05 | #N/A   | 260    |
| 9,12-Octadecadienoic acid (Z,Z)-, trimethylsilyl ester       | 75  | 2265 | 1.77 | 3360   | 5130   |
| trans-9-Octadecenoic acid, trimethylsilyl ester              | 129 | 2275 | 1.69 | 2530   | 30100  |
| Octadecanoic acid, trimethylsilyl ester                      | 341 | 2305 | 1.6  | 202050 | 136170 |
| Arachidonic acid, trimethylsilyl ester                       | 75  | 2415 | 1.94 | #N/A   | 320    |
| Sebacic acid, bis(trimethylsilyl) ester                      | 73  | 2495 | 1.47 | 2250   | 2460   |
| Hexanoic acid, trimethylsilyl ester                          | 73  | 2510 | 1.47 | 650    | 230    |
| Tetracosanoic acid, trimethylsilyl ester                     | 117 | 2840 | 1.67 | 190    | 210    |
| Cholesterol trimethylsilyl ether                             | 129 | 3080 | 2.23 | 1650   | 5820   |





|       |       |       |       |       |       |       |       |       |
|-------|-------|-------|-------|-------|-------|-------|-------|-------|
| #N/A  | #N/A  | #N/A  | #N/A  | #N/A  | #N/A  | #N/A  | #N/A  | #N/A  |
| 2260  | 850   | 1440  | 760   | 4670  | 1250  | 3920  | 20370 | 3740  |
| 5700  | 1440  | 2360  | 1390  | 4020  | 1950  | 10600 | 3620  | 8120  |
| 2500  | 580   | 1280  | 7610  | 2430  | 18500 | 3510  | 10330 | 4330  |
| 1340  | 500   | 830   | #N/A  | 2110  | #N/A  | 1470  | 2890  | 2250  |
| 1400  | #N/A  | #N/A  | 960   | 2160  | 1870  | 3640  | 2790  | 2180  |
| 500   | #N/A  | #N/A  | 290   | #N/A  | #N/A  | #N/A  | #N/A  | #N/A  |
| 830   | 430   | 380   | 420   | 350   | 620   | 2040  | #N/A  | 290   |
| #N/A  | #N/A  | #N/A  | #N/A  | #N/A  | #N/A  | #N/A  | #N/A  | #N/A  |
| 21830 | 21030 | 10400 | 10910 | 4040  | 17870 | #N/A  | 4350  | 3900  |
| 7440  | 2890  | 3120  | 1940  | 5150  | 6430  | #N/A  | 4460  | 3310  |
| 350   | 260   | #N/A  | 100   | #N/A  | #N/A  | #N/A  | #N/A  | #N/A  |
| 3950  | 850   | 1790  | 1110  | 1750  | 910   | 5110  | #N/A  | 3360  |
| 11790 | 3530  | 10200 | 2170  | 15620 | 1640  | 17760 | #N/A  | 32690 |
| 2740  | 740   | 700   | 1480  | 7860  | 2760  | 2390  | 4600  | 3540  |
| 280   | 270   | 320   | 490   | #N/A  | #N/A  | #N/A  | #N/A  | #N/A  |
| 39760 | 11890 | 56080 | 28830 | 90110 | 80290 | 58760 | 68830 | 80450 |
| 3200  | 1970  | 2180  | 220   | 5330  | #N/A  | 1120  | 2180  | 4320  |
| 1050  | 510   | 550   | 510   | #N/A  | #N/A  | #N/A  | #N/A  | #N/A  |
| 1060  | 650   | 790   | 310   | 780   | #N/A  | #N/A  | #N/A  | 1110  |
| 1320  | 280   | 280   | 180   | #N/A  | #N/A  | #N/A  | #N/A  | #N/A  |

|       |        |        |        |       |       |      |       |       |
|-------|--------|--------|--------|-------|-------|------|-------|-------|
| 510   | #N/A   | #N/A   | 280    | 1000  | #N/A  | #N/A | 1500  | 900   |
| 20620 | 8100   | 2370   | 5500   | #N/A  | #N/A  | #N/A | #N/A  | #N/A  |
| 12770 | 42790  | 5390   | 5050   | 7090  | 22420 | #N/A | 7090  | 17090 |
| 5100  | 152790 | 118920 | 167840 | 40780 | 51910 | #N/A | 63300 | 83360 |
| 600   | 780    | #N/A   | #N/A   | #N/A  | #N/A  | #N/A | #N/A  | #N/A  |
| 9920  | 3310   | 1940   | 4470   | #N/A  | #N/A  | #N/A | #N/A  | #N/A  |
| 1240  | 230    | 270    | 440    | #N/A  | #N/A  | #N/A | #N/A  | #N/A  |
| 230   | #N/A   | #N/A   | #N/A   | #N/A  | #N/A  | #N/A | #N/A  | #N/A  |
| 2620  | 4810   | 1930   | 1440   | 1100  | #N/A  | #N/A | #N/A  | 620   |

| F1_CON_7 | F2_CON_7 | F3_CON_7 | F1_IUGR_7 | F2_IUGR_7 | F3_IUGR_7 | M1_CON_7 | M2_CON_7 | M3_CON_7 |
|----------|----------|----------|-----------|-----------|-----------|----------|----------|----------|
| 34490    | 4610     | 12340    | 5150      | 51530     | 6850      | #N/A     | 3700     | 1690     |
| 10430    | 18050    | 17210    | 17720     | 11050     | 18310     | 37830    | 26510    | 8570     |
| #N/A     | 670      | 850      | 810       | 800       | 750       | 860      | 1270     | 870      |
| 1590     | 2300     | 2870     | 2830      | 2790      | 2690      | 5830     | 4150     | 2850     |
| 2790     | 6580     | 10480    | 4740      | 6870      | 3690      | 90       | 21020    | 7250     |
| 610      | 200      | 1080     | 960       | 1140      | 1040      | 2150     | 1590     | 1080     |
| 1760     | 1110     | 2590     | 1170      | 2540      | 1240      | #N/A     | 4220     | #N/A     |
| #N/A     | #N/A     | 1320     | #N/A      | #N/A      | #N/A      | 2940     | 2050     | #N/A     |
| #N/A     | #N/A     | #N/A     | #N/A      | #N/A      | #N/A      | #N/A     | #N/A     | #N/A     |
| 2980     | 1220     | 4890     | 4930      | 1200      | 4030      | 10040    | 7290     | 1790     |
| #N/A     | #N/A     | #N/A     | #N/A      | #N/A      | #N/A      | #N/A     | #N/A     | #N/A     |
| #N/A     | #N/A     | #N/A     | #N/A      | #N/A      | #N/A      | #N/A     | #N/A     | #N/A     |
| 3010     | 19140    | 14560    | 12340     | 9430      | 16820     | 4130     | 5210     | 4440     |
| 800      | 1750     | 3660     | 1490      | 2150      | 1310      | 2710     | 5280     | 2260     |
| 1520     | 1820     | 4800     | 2830      | 7260      | 2420      | #N/A     | 3280     | 2760     |
| 920      | #N/A     | 550      | #N/A      | #N/A      | 990       | #N/A     | #N/A     | 980      |
| #N/A     | #N/A     | #N/A     | #N/A      | #N/A      | #N/A      | #N/A     | #N/A     | #N/A     |
| 1870     | 270      | 1600     | 1090      | 2100      | 1390      | 700      | 1730     | 1660     |
| 124190   | 8220     | 50380    | 84580     | 33830     | 52880     | 32370    | 20330    | 62060    |
| 5570     | 14900    | 17290    | 12190     | 4080      | 23240     | 1920     | 8070     | 2720     |
| #N/A     | 2460     | 1310     | #N/A      | 610       | 610       | #N/A     | 790      | 11970    |
| #N/A     | #N/A     | 2020     | 1620      | 870       | 1230      | #N/A     | 1040     | #N/A     |
| 7920     | 880      | 5930     | 2550      | 5910      | 2690      | 3310     | 1290     | 1510     |
| #N/A     | #N/A     | 380      | #N/A      | #N/A      | 570       | 410      | #N/A     | #N/A     |



|       |      |      |      |       |      |      |      |      |
|-------|------|------|------|-------|------|------|------|------|
| #N/A  | #N/A | #N/A | #N/A | #N/A  | #N/A | #N/A | #N/A | #N/A |
| 14520 | #N/A | 1780 | 1550 | 6320  | 2000 | #N/A | 1280 | 1810 |
| 12830 | 1760 | 5190 | 3180 | 1750  | 3570 | 1150 | 3770 | 3480 |
| 26260 | 3830 | 7910 | 3180 | 51570 | 5500 | 2100 | 4770 | 4560 |
| #N/A  | #N/A | #N/A | #N/A | #N/A  | #N/A | #N/A | #N/A | #N/A |
| 930   | #N/A | 900  | #N/A | 4120  | 600  | #N/A | 800  | 330  |
| #N/A  | #N/A | #N/A | #N/A | #N/A  | #N/A | #N/A | #N/A | #N/A |
| #N/A  | #N/A | #N/A | #N/A | #N/A  | #N/A | #N/A | #N/A | #N/A |
| 7230  | 710  | 5590 | 2840 | 5020  | 1500 | #N/A | #N/A | 4640 |

**M1\_IUGR\_7 M2\_IUGR\_7 M3\_IUGR\_7**

|       |       |       |
|-------|-------|-------|
| 2290  | 60    | #N/A  |
| 15420 | 29650 | 28400 |
| #N/A  | 740   | 740   |
| 2320  | 4190  | 4020  |
| 2130  | 1710  | 3480  |
| 780   | 1580  | 1540  |
| 3300  | #N/A  | #N/A  |
| #N/A  | #N/A  | 2020  |
| #N/A  | #N/A  | #N/A  |
| 4020  | 7750  | 6670  |
| #N/A  | #N/A  | #N/A  |
| #N/A  | #N/A  | #N/A  |
| 7980  | 15730 | 12050 |
| 1040  | 2260  | 1870  |
| 1860  | 2560  | 2120  |
| #N/A  | 1130  | #N/A  |
| #N/A  | #N/A  | #N/A  |
| 600   | 1140  | #N/A  |
| 20800 | 11480 | 16320 |
| 4830  | 15600 | 4980  |
| 1980  | 1110  | 910   |
| #N/A  | 3610  | 870   |
| #N/A  | #N/A  | 440   |
| 470   | 680   | 560   |

|        |       |        |
|--------|-------|--------|
| #N/A   | 1300  | #N/A   |
| 3060   | 2060  | 4420   |
| 151220 | 9160  | 12000  |
| 1480   | #N/A  | 3640   |
| #N/A   | #N/A  | #N/A   |
| 1880   | 970   | 3270   |
| #N/A   | #N/A  | #N/A   |
| 270    | 790   | 400    |
| 4800   | 9110  | 8560   |
| 7090   | 31410 | 4860   |
| 9130   | 12690 | 12380  |
| #N/A   | #N/A  | #N/A   |
| 2680   | 1710  | 3880   |
| 7130   | 5230  | 10870  |
| #N/A   | #N/A  | #N/A   |
| #N/A   | #N/A  | #N/A   |
| 38360  | 58870 | 163330 |
| #N/A   | #N/A  | #N/A   |
| #N/A   | #N/A  | #N/A   |
| #N/A   | #N/A  | #N/A   |
| #N/A   | #N/A  | #N/A   |



|      |      |      |
|------|------|------|
| #N/A | #N/A | #N/A |
| 610  | 970  | #N/A |
| 1540 | 2530 | 610  |
| 1920 | 4780 | 830  |
| #N/A | #N/A | #N/A |
| #N/A | #N/A | #N/A |
| #N/A | #N/A | #N/A |
| #N/A | #N/A | #N/A |
| #N/A | 820  | #N/A |

**Supplementary Table 5. Identifiers of metabolites including NIST Identifier, common name, HMDB ID, KEGG ID, PubChem ID, Class**

| <b>NIST Identifier</b>                                               | <b>Common Name</b>             | <b>HMDB</b>                | <b>KEGG</b>  | <b>PubChem</b> | <b>Chemical class</b>        | <b>Pathway</b>                                                                                       |
|----------------------------------------------------------------------|--------------------------------|----------------------------|--------------|----------------|------------------------------|------------------------------------------------------------------------------------------------------|
| Pentanoic acid, trimethylsilyl ester                                 | Valeric acid                   | HMDB0000892                | C00803       | 7991           | Fatty Acid                   | NA                                                                                                   |
| Decane                                                               | Decane                         | HMDB0031450                | NA           | 15600          | Hydrocarbon                  | NA                                                                                                   |
| Benzene, 1,2,3-trimethyl-Ethanedioic acid, bis(trimethylsilyl) ester | Hemimellitene<br>oxalic acid   | HMDB0059901<br>HMDB0002329 | NA<br>C00209 | 10686<br>971   | benzenoid<br>carboxylic acid | Degradation of Aromatic Compounds<br>metabolism of glycolic acid and ascorbic acid excreted in urine |
| Indane                                                               | Indane                         | HMDB0059837                | NA           | 10326          | benzenoid                    | Degradation of Aromatic Compounds                                                                    |
| 3-Ethylphenol, trimethylsilyl ether                                  | 3-Ethylphenol                  | HMDB0059873                | C14386       | 6997           | benzenoid                    | Degradation of Aromatic Compounds                                                                    |
| Benzene, 2-ethyl-1,4-dimethyl-                                       | 2-ethyl-p-xylene               | HMDB0059890 (Predicted)    | NA           | 15653          | benzenoid                    | Degradation of Aromatic Compounds                                                                    |
| Heptanoic acid, trimethylsilyl ester                                 | Heptanoic acid                 | HMDB0000666                | C17714       | 8094           | carboxylic acid              | NA                                                                                                   |
| Benzeneacetic acid, trimethylsilyl ester                             | Phenylacetic acid              | HMDB00209                  | C07086       | 999            | carboxylic acid              | Phenylalanine metabolism                                                                             |
| 1,2-Benzenediol bis(trimethylsilyl) ether                            | pyrocatechol                   | HMDB00957                  | C00090       | 289            | benzenoid                    | Aminobenzoate degradation                                                                            |
| Benzoic acid, 2-[(trimethylsilyl)oxy]-, trimethylsilyl ester         | salicylic acid                 | HMDB01895                  | C00805       | 338            | carboxylic acid              | Phenylalanine metabolism                                                                             |
| Dodecanoic acid, trimethylsilyl ester                                | Lauric acid                    | HMDB00638                  | C02679       | 3893           | Fatty Acid                   | fatty acid synthesis                                                                                 |
| 1-Pentadecanamine, N,N-dimethyl-                                     | N,N-dimethyl-1-Pentadecanamine | No result                  | NA           | 87232          | amine                        | NA                                                                                                   |
| 1-Octanamine, N-methyl-N-octyl-                                      | N-methyl-N-octyl-1-Octanamine  | No result                  | NA           | 78202          | amine                        | NA                                                                                                   |

|                                                                       |                                  |             |        |          |                   |                                                     |
|-----------------------------------------------------------------------|----------------------------------|-------------|--------|----------|-------------------|-----------------------------------------------------|
| Azelaic acid, bis(trimethylsilyl) ester                               | nonanedioic acid                 | HMDB00784   | C08261 | 2266     | Fatty Acid        | NA                                                  |
| Glycine, N-benzoyl-, trimethylsilyl ester                             | hippuric acid                    | HMDB00714   | C01586 | 464      | carboxylic acid   | Phenylalanine metabolism                            |
| 1H-Indole-3-acetic acid, 1-(trimethylsilyl)-, trimethylsilyl ester    | Indoleacetic acid                | HMDB00197   | C00954 | 802      | Indoles           | tryptophan metabolism                               |
| trans-9-Octadecenoic acid, trimethylsilyl ester                       | Elaidic acid                     | HMDB0000573 | C00712 | 445639   | Fatty acid        | Biosynthesis of unsaturated fatty acids             |
| Octadecanoic acid, trimethylsilyl ester                               | Stearic acid                     | HMDB00827   | C01530 | 5281     | Fatty acid        | Biosynthesis of unsaturated fatty acids             |
| N,N-Dimethyloctylamine                                                | N,N-Dimethyloctylamine           | No result   | NA     | 16224    | amine             | NA                                                  |
| Benzenepropanoic acid, trimethylsilyl ester                           | hydrocinnamic acid               | HMDB00764   | C05629 | 107      | phenylpropanoids  | phenylalanine metabolism                            |
| Benzenoacetic acid, 3-[(trimethylsilyl)oxy]-, trimethylsilyl ester    | 3-hydroxyphenylacetic acid       | HMDB0000440 | C05593 | 12122    | phenol            | tyrosine metabolism associated with phenylketonuria |
| 3-Octenoic acid, trimethylsilyl ester                                 | (Z)-3-Octenoic acid              | No result   | NA     | 5282716  | Fatty Acid        | NA                                                  |
| Benzenepropanoic acid, ‡-[(trimethylsilyl)oxy]-, trimethylsilyl ester | Phenyllactic acid                | HMDB0000779 | C01479 | 3848     | phenylpropanoids  | phenylalanine metabolism                            |
| Cholesterol trimethylsilyl ether                                      | Cholesterol                      | HMDB0000067 | C00187 | 11025495 | sterol            | Steroid biosynthesis                                |
| N-Methyl-N-benzyltetradecanamine                                      | N-Methyl-N-benzyltetradecanamine | No result   | NA     | 584166   | amine             | NA                                                  |
| Trimethylsilyl 2,4-dichlorobenzoate                                   | 2,4-dichlorobenzoate             | No result   | NA     | 5787     | benzenoid         | Degradation of Aromatic Compounds                   |
| Decanoic acid, trimethylsilyl ester                                   | Capric acid                      | HMDB000511  | NA     | 2669     | dicarboxylic acid | normal urinary acid                                 |

|                                                                                                           |                                                   |             |        |          |                  |                                                                                                          |
|-----------------------------------------------------------------------------------------------------------|---------------------------------------------------|-------------|--------|----------|------------------|----------------------------------------------------------------------------------------------------------|
| 9,12-Octadecadienoic acid (Z,Z)-, trimethylsilyl ester                                                    | Linoleic acid                                     | HMDB00673   | C01595 | 5280450  | Fatty Acid       | Linoleic acid metabolism/Biosynthesis of unsaturated fatty acids                                         |
| 2-Methoxyphenol trimethylsilyl ether                                                                      | Catechol mono methyl ester                        | HMDB01398   | C01502 | 460      | benzenoid        | Aminobenzoate degradation                                                                                |
| Sebacic acid, bis(trimethylsilyl) ester                                                                   | Decanedioic acid                                  | HMDB00792   | C08277 | 5192     | Fatty Acid       | NA                                                                                                       |
| Propanoic acid, 2-oxo-3-(trimethylsilyl)-, trimethylsilyl ester                                           | (S)3-hydroxyisobutyric acid (3-HIBA)              | HMDB0000023 | C06001 | 440873   | hydroxy acid     | Valine, leucine and isoleucine degradation                                                               |
| Benzene, 1,2,3,4-tetramethyl-                                                                             | prehnitene                                        | HMDB0059823 | NA     | 10236    | benzenoid        | Degradation of Aromatic Compounds                                                                        |
| Benzenepropanoic acid, 4-[[trimethylsilyloxy]- $\beta$ -[[trimethylsilyloxy]imino]-, trimethylsilyl ester | 4-Hydroxyphenylpyruvic acid (4-HPPA)              | HMDB0000707 | C01179 | 979      | benzenoid        | Phenylalanine, tyrosine and tryptophan biosynthesis/ Ubiquinone and other terpenoid-quinone biosynthesis |
| 3-t-Pentylcyclopentanone                                                                                  | 3-t-Pentylcyclopentanone                          | No result   | NA     | 551379   | Ketone           | NA                                                                                                       |
| 2-Hepten-4-one, 6-methyl-                                                                                 | 6-methyl-2-Hepten-4-one                           | No result   | NA     | 12502788 | Ketone           | NA                                                                                                       |
| 4-Methylcatechol, bis(trimethylsilyl) ether                                                               | 4-methylcatechol                                  | HMDB0000873 | C06730 | 9958     | benzenoid        | Benzoate degradation/Degradation of Aromatic Compounds                                                   |
| Mercaptoacetic acid, bis(trimethylsilyl)-                                                                 | Mercaptoacetic acid                               | No result   | C02086 | 1133     | carboxylic acid  | NA                                                                                                       |
| 2H-Pyran-2-one, tetrahydro-6-methyl-                                                                      | delta Hexalactone                                 | HMDB0000453 | NA     | 13204    | lactons          | NA                                                                                                       |
| Benzenepropanoic acid, 3-methoxy-4[[trimethylsilyloxy]-, trimethylsilyl ester                             | acid 3-(4-hydroxy-3-methoxyphenyl) propanoic acid | HMDB0062121 | NA     | 14340    | phenylpropanoids | NA                                                                                                       |

|                                                                       |                                  |                         |        |        |                  |                                               |
|-----------------------------------------------------------------------|----------------------------------|-------------------------|--------|--------|------------------|-----------------------------------------------|
| 1H-Indole-3-propanoic acid, 1-(trimethylsilyl)-, trimethylsilyl ester | Indole-3-propionic acid          | HMDB0002302             | NA     | 3744   | Indoles          | tryptophan metabolism                         |
| Tridecane                                                             | Tridecane                        | HMDB0034284             | C13834 | 12388  | hydrocarbons     | NA                                            |
| 3-Phenyl-3-trimethylsilyloxypropanoic acid, trimethylsilyl ester      | 3-hydroxy-3-phenylpropanoic acid | HMDB0124925 (predicted) | NA     | 92959  | phenylpropanoids | related to phenyl pyruvic acid metabolism     |
| Urea, N,N'-bis(trimethylsilyl)-                                       | Urea                             | HMDB00294               | C00086 | 1176   | amide            | Arginine biosynthesis                         |
| 3-Phenyl-3-(trimethylsilyloxy)butan-2-one                             | 3-hydroxy-3-phenylbutan-2-one    | No result               | NA     | 233220 | ketone           | NA                                            |
| L-Tryptophan, N,1-bis(trimethylsilyl)-, trimethylsilyl ester          | L-Tryptophan                     | HMDB00929               | C00078 | 6305   | amino acid       | tryptophan metabolism                         |
| 1,11-Undecanedioic acid, di(trimethylsilyl) ester                     | Undecanedioic acid               | HMDB00888               | NA     | 15816  | Fatty Acid       | NA                                            |
| Dodecanedioic acid, bis(trimethylsilyl) ester                         | Dodecanedioic acid               | HMDB0000623             | C02678 | 12736  | Fatty Acid       | NA                                            |
| n-Pentadecanoic acid, trimethylsilyl ester                            | Pentadecanoic acid               | HMDB0000826             | C16537 | 13849  | Fatty acid       | NA                                            |
| Hexanoic acid, trimethylsilyl ester                                   | caproic acid                     | HMDB0000535             | C01585 | 8892   | Fatty Acid       | Beta Oxidation of Very Long Chain Fatty Acids |
| 2,4,6,8-Tetramethyl-1-undecene                                        | Tetramethyl-1-undecene           | No result               | NA     | 536235 | Hydrocarbon      | NA                                            |
| n-Tridecanoic acid, trimethylsilyl ester                              | Tridecanoic acid                 | HMDB00910               | C17076 | 12530  | Fatty Acid       | NA                                            |
| Arachidonic acid, trimethylsilyl ester                                | Arachidonic acid                 | HMDB01043               | C00219 | 444899 | Fatty Acid       | Biosynthesis of unsaturated fatty acids       |
| Tetracosanoic acid, trimethylsilyl ester                              | lignoceric acid                  | HMDB0002003             | C08320 | 11197  | Fatty Acid       | Biosynthesis of unsaturated fatty acids       |

and Pathway. X = present in all animals, O = not present in all animals.

**F CON Chow F IUGR Chow M CON Chow M IUGR Chow F CON HFCS F IUGR HFCS M CON HFCS M IUGR HFCS**

|   |   |   |   |   |   |   |   |
|---|---|---|---|---|---|---|---|
| X | X | X | O | X | X | O | O |
| X | X | X | X | X | X | X | X |
| X | X | X | X | X | X | X | X |
| X | O | O | X | X | X | X | X |
| X | X | X | X | X | X | X | X |
| X | X | O | X | X | X | X | O |
| X | X | X | X | X | X | X | X |
| X | X | X | O | X | X | O | X |
| X | X | X | X | X | X | X | X |
| X | X | X | X | X | X | X | X |
| X | X | X | X | X | X | O | X |
| X | X | X | O | X | X | X | X |
| X | X | O | X | X | X | X | X |
| X | X | O | X | X | X | X | X |

|   |   |   |   |   |   |   |   |   |
|---|---|---|---|---|---|---|---|---|
| X | X | X | O | X | X | X | X |   |
| X | X | X | O | X | X | X | X |   |
| X | X | X | X | X | X | X | X |   |
| X | X | O | X | X | X | X | X |   |
| X | X | O | X | X | X | X | X |   |
| X | X | O | O | X | X | X | X |   |
| X | X | O | X | X | X | X | O |   |
| X | O | X | X | O | O | X | X |   |
| O | O | O | O | O | O | O | X |   |
| X | X | X | X | X | O | X | O | O |
| X | X | O | O | X | X | X | O | O |
| X | X | X | X | X | X | X | O | X |
| X | X | X | X | X | X | X | X | X |
| O | O | O | O | O | O | X | X | O |

|   |   |   |   |   |   |   |   |
|---|---|---|---|---|---|---|---|
| X | X |   | O | O | X | O | O |
| X | X | O | O | O | O | O | O |
| X | X |   |   | O | O | O | O |

|  |   |   |   |   |
|--|---|---|---|---|
|  | X | X | X | X |
|  | X | X | X | X |
|  | O | O | O | O |
|  | X | X | O | O |
|  | X | O | X | O |
|  | O | X | O | O |
|  | O | X | O | X |

|   |   |   |   |
|---|---|---|---|
| X | X | X | X |
|---|---|---|---|

|   |   |   |   |
|---|---|---|---|
| X | X | X | X |
|---|---|---|---|



|   |   |   |   |
|---|---|---|---|
| X | X | O | O |
| X | X | X | X |

|   |   |   |   |
|---|---|---|---|
| X | O | O | X |
| X | O | O | X |

|   |   |   |   |
|---|---|---|---|
| X | O | O | O |
|---|---|---|---|

|   |   |   |   |
|---|---|---|---|
| O | O | O | X |
|---|---|---|---|

|   |   |   |   |
|---|---|---|---|
| X | X | O | O |
|---|---|---|---|

|   |   |   |   |
|---|---|---|---|
| X | X | O | O |
|---|---|---|---|

|   |   |
|---|---|
| X | X |
|---|---|

|   |   |
|---|---|
| X | X |
|---|---|

|   |   |
|---|---|
| X | X |
|---|---|

|   |   |
|---|---|
| O | O |
|---|---|

|   |   |
|---|---|
| O | O |
|---|---|

X

**Supplementary Table 6: HFCS Diet vs Chow Diet Gene**

| Gene Symbol | Gene Name                                                | Accession No. | CON Chow F Mean | CON HFHS F Mean | p-val CON F HFHS vs. CON F Chow | Ratio CON F HFHS vs. CON F Chow | REFSEQ ID | NEPHRON (MEAN RPKM) | COLLECTIN G DUCT (MEAN RPKM) |
|-------------|----------------------------------------------------------|---------------|-----------------|-----------------|---------------------------------|---------------------------------|-----------|---------------------|------------------------------|
| COL6A3      | collagen type VI alpha 3 chain(COL6A3)                   | NM_004369     | 103.1           | 136.4           | 0.00078                         | 1.288                           |           |                     |                              |
| ACLY        | ATP citrate lyase(ACLY)                                  | NM_001096     | 317             | 434.6           | 0.00096                         | 1.374                           |           |                     |                              |
|             |                                                          | BQ186959      | 111.6           | 101.8           | 0.00115                         | 0.891                           |           |                     |                              |
| NTRK3       | neurotrophic receptor tyrosine kinase 3(NTRK3)           | NM_002530     | 102.8           | 119.4           | 0.0013                          | 1.13                            |           |                     |                              |
|             |                                                          | XM_944079     | 122.9           | 159.3           | 0.00131                         | 1.257                           |           |                     |                              |
| PPP1CA      | protein phosphatase 1 catalytic subunit alpha(PPP1CA)    | NM_002708     | 121.5           | 107.1           | 0.00182                         | 0.861                           |           |                     |                              |
|             |                                                          | AW081577      | 104.5           | 123.6           | 0.00203                         | 1.156                           |           |                     |                              |
|             |                                                          | XM_944499     | 109.3           | 100.2           | 0.0026                          | 0.897                           |           |                     |                              |
| C1QTNF6     | C1q and tumor necrosis factor related protein 6(C1QTNF6) | NM_031910     | 106.2           | 114.9           | 0.00271                         | 1.136                           | NM_017193 | 356.13              | 8.18                         |
| C1QTNF6     | C1q and tumor necrosis factor related protein 6(C1QTNF6) | NM_031910     | 110.3           | 128.7           | 0.00271                         | 1.136                           | NM_017193 | 356.13              | 8.18                         |

|         |                                                                |              |       |       |         |       |           |        |      |
|---------|----------------------------------------------------------------|--------------|-------|-------|---------|-------|-----------|--------|------|
| SMAGP   | small cell adhesion glycoprotein(SMAGP)                        | NM_001033873 | 190.5 | 156.5 | 0.00286 | 0.813 | NM_017193 | 356.13 | 8.18 |
| SIDT2   | SID1 transmembrane family member 2(SIDT2)                      | NM_001040455 | 350   | 417.7 | 0.00289 | 1.205 | NM_017193 | 356.13 | 8.18 |
| FAP     | fibroblast activation protein alpha(FAP)                       | NM_004460    | 96.4  | 127.9 | 0.0029  | 1.298 |           |        |      |
| ISPD    | isoprenoid synthase domain containing(ISPD)                    | NM_001101417 | 118.8 | 104   | 0.00308 | 0.854 |           |        |      |
|         |                                                                | XM_941979    | 99.2  | 125.3 | 0.00341 | 1.217 |           |        |      |
| ABCA9   | ATP binding cassette subfamily A member 9(ABCA9)               | NM_080283    | 115.9 | 144.3 | 0.00348 | 1.218 |           |        |      |
| CEP63   | centrosomal protein 63(CEP63)                                  | NM_025180    | 139.3 | 186.9 | 0.00359 | 1.326 |           |        |      |
| SCD     | stearoyl-CoA desaturase(SCD)                                   | NM_005063    | 116.4 | 281.9 | 0.00363 | 2.346 |           |        |      |
| CD248   | CD248 molecule(CD248)                                          | NM_020404    | 120.3 | 190.8 | 0.00367 | 1.546 |           |        |      |
| DCUN1D5 | defective in cullin neddylation 1 domain containing 5(DCUN1D5) | AK094744     | 121.4 | 108.2 | 0.00378 | 0.87  |           |        |      |
| ISM1    | isthmin 1(ISM1)                                                | NM_080826    | 93.4  | 114   | 0.00384 | 1.189 |           |        |      |
| GORAB   | golgin, RAB6 interacting(GORAB)                                | NM_152281    | 114.4 | 130.8 | 0.00439 | 1.118 |           |        |      |
| NUAK1   | NUAK family kinase 1(NUAK1)                                    | NM_014840    | 266.5 | 438.6 | 0.00475 | 1.605 |           |        |      |

|        |                                                      |              |       |       |         |       |
|--------|------------------------------------------------------|--------------|-------|-------|---------|-------|
| MRPL34 | mitochondrial ribosomal protein L34(MRPL34)          | NM_023937    | 399.5 | 330.5 | 0.00481 | 0.823 |
|        |                                                      | XM_044178    | 107.6 | 90.6  | 0.00495 | 0.832 |
| POSTN  | periostin(POSTN)                                     | NM_006475    | 91.7  | 128.2 | 0.00508 | 1.367 |
| NFASC  | neurofascin(NFASC)                                   | NM_001005387 | 102.8 | 118.8 | 0.0052  | 1.126 |
| CPXM1  | carboxypeptidase X, M14 family member 1(CPXM1)       | NM_019609    | 116.2 | 154.4 | 0.00551 | 1.302 |
| PCSK5  | proprotein convertase subtilisin/kexin type 5(PCSK5) | NM_006200    | 111.9 | 151.8 | 0.00588 | 1.325 |
| CRK    | CRK proto-oncogene, adaptor protein(CRK)             | NM_016823    | 150.3 | 166.2 | 0.00589 | 1.287 |
| CRK    | CRK proto-oncogene, adaptor protein(CRK)             | NM_016823    | 153.7 | 144.3 | 0.00589 | 1.287 |
| CRK    | CRK proto-oncogene, adaptor protein(CRK)             | NM_016823    | 260.4 | 339.6 | 0.00589 | 1.287 |
| COL6A3 | collagen type VI alpha 3 chain(COL6A3)               | NM_057165    | 305   | 592.9 | 0.00608 | 1.983 |
| ECM2   | extracellular matrix protein 2(ECM2)                 | NM_001393    | 105.9 | 139.8 | 0.0061  | 1.292 |
| ECM2   | extracellular matrix protein 2(ECM2)                 | NM_001393    | 204.9 | 348.7 | 0.0061  | 1.292 |
| NSDHL  | NAD(P) dependent steroid dehydrogenase-like(NSDHL)   | NM_015922    | 185.9 | 232.8 | 0.00695 | 1.235 |

|         |                                                                        |              |       |       |         |       |
|---------|------------------------------------------------------------------------|--------------|-------|-------|---------|-------|
| PMEPA1  | prostate transmembrane protein, androgen induced 1(PMEPA1)             | NM_199169    | 119.3 | 126.9 | 0.0071  | 1.383 |
| PMEPA1  | prostate transmembrane protein, androgen induced 1(PMEPA1)             | NM_199169    | 134   | 189.8 | 0.0071  | 1.383 |
| KCNH2   | potassium voltage-gated channel subfamily H member 2(KCNH2)            | NM_172056    | 108.1 | 127.8 | 0.00748 | 1.153 |
| THBS2   | thrombospondin 2(THBS2)                                                | NM_003247    | 143.9 | 291.4 | 0.00795 | 1.976 |
| OLFML2B | olfactomedin like 2B(OLFML2B)                                          | XM_001724468 | 114.1 | 132.4 | 0.00859 | 1.129 |
| SRPX    | sushi repeat containing protein, X-linked(SRPX)                        | NM_015441    | 132.8 | 169.1 | 0.00893 | 1.242 |
| SRPX    | sushi repeat containing protein, X-linked(SRPX)                        | NM_006307    | 165.6 | 376.1 | 0.00915 | 2.23  |
| YIF1B   | Yip1 interacting factor homolog B, membrane trafficking protein(YIF1B) | NM_033557    | 124   | 110.9 | 0.00937 | 0.876 |
| MPV17L  | MPV17 mitochondrial inner membrane protein like(MPV17L)                | NM_173803    | 109.6 | 95.4  | 0.00967 | 0.858 |
| MPV17L  | MPV17 mitochondrial inner membrane protein like(MPV17L)                | AA447555     | 118.4 | 99.9  | 0.00973 | 0.827 |
| XRCC5   | X-ray repair cross complementing 5(XRCC5)                              | NM_021141    | 161.5 | 137.8 | 0.00996 | 0.845 |

|        |                         |          |        |        |         |       |
|--------|-------------------------|----------|--------|--------|---------|-------|
|        |                         | XM_92722 |        |        |         |       |
|        |                         | 8        | 109.4  | 124.3  | 0.01005 | 1.111 |
|        |                         | DB302602 | 106.4  | 130.3  | 0.0105  | 1.194 |
| TBC1D8 | TBC1 domain family      | NM_0177  |        |        |         |       |
| B      | member 8B(TBC1D8B)      | 52       | 113.6  | 108.2  | 0.01075 | 0.82  |
| TBC1D8 | TBC1 domain family      | NM_0177  |        |        |         |       |
| B      | member 8B(TBC1D8B)      | 52       | 176.8  | 144.8  | 0.01075 | 0.82  |
|        | zinc finger protein     | NM_2073  |        |        |         |       |
| ZNF467 | 467(ZNF467)             | 36       | 264.2  | 196.8  | 0.01105 | 0.755 |
|        | collagen type V alpha 1 | NM_0000  |        |        |         |       |
| COL5A1 | chain(COL5A1)           | 93       | 107.3  | 135.9  | 0.01115 | 1.241 |
| PLA2G2 | phospholipase A2 group  | NM_0145  |        |        |         |       |
| E      | IIE(PLA2G2E)            | 89       | 117.2  | 107.4  | 0.01122 | 0.894 |
|        | protein phosphatase,    |          |        |        |         |       |
|        | Mg2+/Mn2+ dependent     | NM_1779  |        |        |         |       |
| PPM1A  | 1A(PPM1A)               | 52       | 108.1  | 128.4  | 0.01159 | 1.16  |
|        | protein phosphatase,    |          |        |        |         |       |
|        | Mg2+/Mn2+ dependent     | NM_1779  |        |        |         |       |
| PPM1A  | 1A(PPM1A)               | 52       | 216    | 207    | 0.01159 | 1.16  |
|        |                         | XM_00171 |        |        |         |       |
|        |                         | 9616     | 115.5  | 103.7  | 0.0116  | 0.875 |
|        | structure specific      |          |        |        |         |       |
|        | recognition protein     | NM_0031  |        |        |         |       |
| SSRP1  | 1(SSRP1)                | 46       | 101.1  | 119.6  | 0.01178 | 1.148 |
|        | heat shock protein      |          |        |        |         |       |
|        | family E (Hsp10)        | NM_0021  |        |        |         |       |
| hspe1  | member 1(HSPE1)         | 57       | 203.9  | 299.6  | 0.01219 | 1.495 |
|        | heat shock protein      |          |        |        |         |       |
|        | family E (Hsp10)        | NM_0021  |        |        |         |       |
| hspe1  | member 1(HSPE1)         | 57       | 1594.2 | 1583.5 | 0.01219 | 1.495 |

|              |                                                                  |                                   |        |        |         |       |
|--------------|------------------------------------------------------------------|-----------------------------------|--------|--------|---------|-------|
| MT2A         | metallothionein<br>2A(MT2A)                                      | NM_0059<br>53                     | 1492.9 | 2670.6 | 0.01243 | 1.87  |
| LINC00560    | long intergenic non-<br>protein coding RNA<br>560(LINC00560)     | BC043278<br>XM_92802<br>9         | 99.1   | 116.9  | 0.01259 | 1.142 |
| MS4A3        | membrane spanning 4-<br>domains A3(MS4A3)                        | NM_0010<br>31666                  | 103.5  | 87.4   | 0.0129  | 0.824 |
| ADORA1       | adenosine A1<br>receptor(ADORA1)                                 | NM_0006<br>74                     | 112.9  | 113.5  | 0.0132  | 1.264 |
| ADORA1       | adenosine A1<br>receptor(ADORA1)                                 | NM_0006<br>74<br>XM_20982<br>4    | 177.8  | 227.4  | 0.0132  | 1.264 |
|              |                                                                  |                                   | 111    | 125    | 0.0134  | 1.097 |
| HNRNP<br>UL2 | heterogeneous nuclear<br>ribonucleoprotein U like<br>2(HNRNPUL2) | NM_0010<br>79559<br>XM_92941<br>3 | 117.9  | 106.5  | 0.0135  | 0.885 |
|              |                                                                  |                                   | 122.6  | 110.3  | 0.01383 | 0.884 |
| PDGFRL       | platelet derived growth<br>factor receptor<br>like(PDGFRL)       | NM_0062<br>07                     | 117.9  | 143.4  | 0.01399 | 1.186 |
|              |                                                                  | CN304166                          | 104.5  | 120.1  | 0.01405 | 1.118 |
| CILP         | cartilage intermediate<br>layer protein(CILP)                    | NM_0036<br>13                     | 115.1  | 117.1  | 0.01464 | 1.504 |
| CILP         | cartilage intermediate<br>layer protein(CILP)                    | NM_0036<br>13                     | 141    | 218.5  | 0.01464 | 1.504 |

|              |                                                                  |                  |       |       |         |       |               |      |       |
|--------------|------------------------------------------------------------------|------------------|-------|-------|---------|-------|---------------|------|-------|
| NAA60        | N(alpha)-acetyltransferase 60, NatF catalytic subunit(NAA60)     | NM_0010<br>83601 | 250.3 | 198.7 | 0.01467 | 0.804 |               |      |       |
| EIF2S1       | eukaryotic translation initiation factor 2 subunit alpha(EIF2S1) | NM_0040<br>94    | 101.6 | 118.4 | 0.01484 | 1.14  | NM_053<br>502 | 4.02 | 18.01 |
| LARS         | leucyl-tRNA synthetase(LARS)                                     | NM_0201<br>17    | 112.4 | 100.7 | 0.01492 | 0.884 | NM_053<br>502 | 4.02 | 18.01 |
| TSHR         | thyroid stimulating hormone receptor(TSHR)                       | NM_0003<br>69    | 109.8 | 139.1 | 0.01514 | 1.235 | NM_053<br>502 | 4.02 | 18.01 |
| TSHR         | thyroid stimulating hormone receptor(TSHR)                       | NM_0003<br>69    | 118.7 | 145.8 | 0.01514 | 1.235 | NM_053<br>502 | 4.02 | 18.01 |
| KCNJ14       | potassium voltage-gated channel subfamily J member 14(KCNJ14)    | NM_0133<br>48    | 123.1 | 112.7 | 0.01535 | 0.899 |               |      |       |
| COL3A1       | collagen type III alpha 1 chain(COL3A1)                          | NM_0000<br>90    | 114   | 165.3 | 0.01547 | 1.425 |               |      |       |
| TRIM51<br>EP | tripartite motif-containing 51E, pseudogene(TRIM51EP )           | NM_0011<br>36118 | 133.3 | 153.7 | 0.0157  | 1.125 |               |      |       |
| PMP22        | peripheral myelin protein 22(PMP22)                              | NM_1533<br>21    | 140.7 | 211.1 | 0.01582 | 1.461 |               |      |       |
| PMP22        | peripheral myelin protein 22(PMP22)                              | NM_1533<br>21    | 304.6 | 629.2 | 0.01582 | 1.461 |               |      |       |



|              |                                                                    |               |        |       |         |       |                  |       |      |
|--------------|--------------------------------------------------------------------|---------------|--------|-------|---------|-------|------------------|-------|------|
| SRRM2        | serine/arginine<br>repetitive matrix<br>2(SRRM2)                   | NM_0163<br>33 | 2133.6 | 2612  | 0.01594 | 1.25  |                  |       |      |
| hamp         | hepcidin antimicrobial<br>peptide(HAMP)                            | NM_0211<br>75 | 136.1  | 114.2 | 0.01607 | 0.82  | NM_001<br>009670 | 33.30 | 2.04 |
| TBC1D7       | TBC1 domain family<br>member 7(TBC1D7)                             | NM_0164<br>95 | 188.3  | 231.6 | 0.01623 | 1.212 |                  |       |      |
| EFNA3        | ephrin A3(EFNA3)                                                   | NM_0049<br>52 | 153.1  | 134.1 | 0.01654 | 0.859 |                  |       |      |
| NRDC         | nardilysin<br>convertase(NRDC)                                     | NM_0025<br>25 | 473.1  | 377.4 | 0.01664 | 0.808 |                  |       |      |
| CAPN6        | calpain 6(CAPN6)                                                   | NM_0142<br>89 | 100.2  | 117.3 | 0.01678 | 1.141 |                  |       |      |
| GPAM         | glycerol-3-phosphate<br>acyltransferase,<br>mitochondrial(GPAM)    | NM_0209<br>18 | 95.4   | 123.8 | 0.0168  | 3.075 |                  |       |      |
| GPAM         | glycerol-3-phosphate<br>acyltransferase,<br>mitochondrial(GPAM)    | NM_0209<br>18 | 195.7  | 626.4 | 0.0168  | 3.075 |                  |       |      |
| ABCA8        | ATP binding cassette<br>subfamily A member<br>8(ABCA8)             | NM_0071<br>68 | 202.1  | 315.8 | 0.01685 | 1.509 |                  |       |      |
| HAVCR1<br>P1 | hepatitis A virus cellular<br>receptor 1 pseudogene<br>1(HAVCR1P1) | NR_00360<br>3 | 107.9  | 181.6 | 0.01745 | 1.577 |                  |       |      |
| HAVCR1<br>P1 | hepatitis A virus cellular<br>receptor 1 pseudogene<br>1(HAVCR1P1) | NR_00360<br>3 | 115.5  | 149.5 | 0.01745 | 1.577 |                  |       |      |
|              |                                                                    | XM_92720<br>8 | 140.8  | 125.7 | 0.01803 | 0.877 |                  |       |      |

|        |                                                                                         |               |        |       |         |       |
|--------|-----------------------------------------------------------------------------------------|---------------|--------|-------|---------|-------|
| Hpvc1  | human papillomavirus<br>(type 18) E5 central<br>sequence-like<br>1(HPVC1)               | NR_00442<br>2 | 111.2  | 103.6 | 0.01808 | 0.915 |
| HACE1  | HECT domain and<br>ankyrin repeat<br>containing E3 ubiquitin<br>protein ligase 1(HACE1) | NM_0207<br>71 | 127.4  | 113.4 | 0.01813 | 0.878 |
|        |                                                                                         | XM_93933<br>4 | 138    | 123.1 | 0.01831 | 0.878 |
| ECM2   | extracellular matrix<br>protein 2(ECM2)                                                 | NM_0013<br>93 | 105.9  | 139.8 | 0.01923 | 1.67  |
| COL6A5 | collagen type VI alpha 5<br>chain(COL6A5)                                               | NM_1532<br>64 | 104.1  | 123.1 | 0.01926 | 1.149 |
| COL6A5 | collagen type VI alpha 5<br>chain(COL6A5)                                               | NM_1532<br>64 | 109.8  | 111.8 | 0.01926 | 1.149 |
| SKP2   | S-phase kinase<br>associated protein<br>2(SK P2)                                        | NM_0326<br>37 | 103.7  | 126.8 | 0.01927 | 1.193 |
| TOB1   | transducer of ERBB2,<br>1(TOB1)                                                         | NM_0057<br>49 | 1031.1 | 568.8 | 0.01938 | 0.556 |
| ASB8   | ankyrin repeat and<br>SOCS box containing<br>8(ASB8)                                    | NM_0240<br>95 | 118.5  | 110.9 | 0.02023 | 0.913 |
| ASB8   | ankyrin repeat and<br>SOCS box containing<br>8(ASB8)                                    | NM_0240<br>95 | 121.6  | 105.5 | 0.02023 | 0.913 |

|         |                                                        |               |       |        |         |       |
|---------|--------------------------------------------------------|---------------|-------|--------|---------|-------|
| AGPAT2  | 1-acylglycerol-3-phosphate O-acyltransferase 2(AGPAT2) | NM_0064<br>12 | 116   | 160.4  | 0.02024 | 1.347 |
| FASTK   | Fas activated serine/threonine kinase(FASTK)           | NM_0330<br>15 | 120.1 | 113.9  | 0.02038 | 0.86  |
| FASTK   | Fas activated serine/threonine kinase(FASTK)           | NM_0330<br>15 | 212.1 | 183    | 0.02038 | 0.86  |
| ASAH1   | N-acylsphingosine amidohydrolase 1(ASAH1)              | NM_1779<br>24 | 122.3 | 113.9  | 0.02039 | 0.912 |
| GPD1    | glycerol-3-phosphate dehydrogenase 1(GPD1)             | NM_0052<br>76 | 101.2 | 125    | 0.02046 | 1.207 |
| MFAP5   | microfibrillar associated protein 5(MFAP5)             | NM_0034<br>80 | 172.5 | 294.7  | 0.02054 | 1.67  |
| C1orf87 | chromosome 1 open reading frame 87(C1orf87)            | NM_1523<br>77 | 101.7 | 98.6   | 0.02062 | 0.893 |
| C1orf87 | chromosome 1 open reading frame 87(C1orf87)            | NM_1523<br>77 | 115.4 | 105.5  | 0.02062 | 0.893 |
|         |                                                        | XM_94418<br>3 | 114.3 | 126.6  | 0.02101 | 1.083 |
| TRIM45  | tripartite motif containing 45(TRIM45)                 | NM_0251<br>88 | 161   | 145.9  | 0.02102 | 0.894 |
| COL1A1  | collagen type I alpha 1 chain(COL1A1)                  | NM_0000<br>88 | 225.5 | 1069.5 | 0.02116 | 4.674 |

|        |                                                              |           |        |        |         |       |
|--------|--------------------------------------------------------------|-----------|--------|--------|---------|-------|
|        |                                                              | AW13504   |        |        |         |       |
|        |                                                              | 5         | 148.4  | 136.1  | 0.02128 | 0.902 |
| PXK    | PX domain containing serine/threonine kinase like(PXK)       | NM_017771 | 190.4  | 157.8  | 0.02146 | 0.831 |
|        |                                                              | XM_938510 | 106.5  | 126    | 0.0215  | 1.151 |
|        |                                                              | XM_925919 | 112    | 101.5  | 0.02158 | 0.883 |
|        |                                                              | XM_941821 | 117.9  | 129.5  | 0.02159 | 1.074 |
| MCMDC2 | minichromosome maintenance domain containing 2(MCMDC2)       | NM_173518 | 113.7  | 115.6  | 0.02195 | 1.363 |
| MCMDC2 | minichromosome maintenance domain containing 2(MCMDC2)       | NM_173518 | 3072.3 | 4141   | 0.02195 | 1.363 |
| MMADHC | methylmalonic aciduria and homocystinuria, cbID type(MMADHC) | NM_015702 | 232.8  | 223.2  | 0.02229 | 0.753 |
| MMADHC | methylmalonic aciduria and homocystinuria, cbID type(MMADHC) | NM_015702 | 637.9  | 568.3  | 0.02229 | 0.753 |
| MMADHC | methylmalonic aciduria and homocystinuria, cbID type(MMADHC) | NM_015702 | 659.1  | 482.7  | 0.02229 | 0.753 |
| COL1A2 | collagen type I alpha 2 chain(COL1A2)                        | NM_000089 | 184.3  | 825.5  | 0.02232 | 3.163 |
| COL1A2 | collagen type I alpha 2 chain(COL1A2)                        | NM_000089 | 499.5  | 1554.2 | 0.02232 | 3.163 |

|             |                                                  |                  |       |       |         |       |
|-------------|--------------------------------------------------|------------------|-------|-------|---------|-------|
|             |                                                  | XM_00172<br>6262 | 98.8  | 114.1 | 0.02255 | 1.12  |
| TUBA3F<br>P | tubulin alpha 3f<br>pseudogene(TUBA3FP)          | NR_00360<br>8    | 120.7 | 112.3 | 0.02259 | 0.91  |
| FBLN2       | fibulin 2(FBLN2)                                 | NM_0019<br>98    | 115.3 | 182.4 | 0.02275 | 2.255 |
| FBLN2       | fibulin 2(FBLN2)                                 | NM_0019<br>98    | 181   | 416.8 | 0.02275 | 2.255 |
|             |                                                  | XM_00113<br>4012 | 208.6 | 459.5 | 0.02279 | 2.21  |
| FBLN2       | fibulin 2(FBLN2)                                 | NM_0019<br>98    | 115.3 | 182.4 | 0.02301 | 1.546 |
| PI15        | peptidase inhibitor<br>15(PI15)                  | NM_0158<br>86    | 113.6 | 109.2 | 0.02312 | 1.222 |
| PI15        | peptidase inhibitor<br>15(PI15)                  | NM_0158<br>86    | 121   | 151   | 0.02312 | 1.222 |
|             |                                                  | XM_92719<br>6    | 98.2  | 112.7 | 0.0234  | 1.124 |
| MIR591      | microRNA 591(MIR591)                             | NR_03032<br>2    | 144.2 | 126   | 0.02363 | 0.861 |
| COG4        | component of oligomeric<br>golgi complex 4(COG4) | NM_0153<br>86    | 103.1 | 121.6 | 0.02364 | 1.15  |
|             |                                                  | AK129542         | 131.2 | 120.2 | 0.02374 | 0.902 |
| GSTM5       | glutathione S-<br>transferase mu<br>5(GSTM5)     | NM_0008<br>51    | 179.1 | 262.6 | 0.02394 | 1.442 |
| CCDC78      | coiled-coil domain<br>containing 78(CCDC78)      | NM_1734<br>76    | 141.9 | 122.2 | 0.02415 | 0.843 |

|             |                                                                          |                  |         |         |         |       |
|-------------|--------------------------------------------------------------------------|------------------|---------|---------|---------|-------|
| ELOVL5      | ELOVL fatty acid<br>elongase 5(ELOVL5)                                   | NM_0218<br>14    | 103.7   | 133.2   | 0.02431 | 1.256 |
| PPTC7       | PTC7 protein<br>phosphatase<br>homolog(PPTC7)                            | NM_1392<br>83    | 282     | 207.2   | 0.0247  | 0.726 |
| SLC29A<br>1 | solute carrier family 29<br>member 1 (Augustine<br>blood group)(SLC29A1) | NM_0010<br>78174 | 122.3   | 137.1   | 0.02484 | 1.314 |
| SLC29A<br>1 | solute carrier family 29<br>member 1 (Augustine<br>blood group)(SLC29A1) | NM_0010<br>78174 | 162.9   | 217.2   | 0.02484 | 1.314 |
| CTHRC1      | collagen triple helix<br>repeat containing<br>1(CTHRC1)                  | NM_1384<br>55    | 104.2   | 140.4   | 0.02514 | 1.375 |
| CTHRC1      | collagen triple helix<br>repeat containing<br>1(CTHRC1)                  | NM_1384<br>55    | 119     | 165.9   | 0.02514 | 1.375 |
| UBC         | ubiquitin C(UBC)                                                         | NM_0210<br>09    | 10602.5 | 9083.6  | 0.02538 | 0.818 |
| UBC         | ubiquitin C(UBC)                                                         | NM_0210<br>09    | 12020.7 | 12013.2 | 0.02538 | 0.818 |
|             |                                                                          | XM_00171<br>8145 | 121.7   | 109.3   | 0.0256  | 0.88  |
| SOX2        | SRY-box 2(SOX2)                                                          | NM_0031<br>06    | 91.1    | 108     | 0.02573 | 1.154 |
| DACH1       | dachshund family<br>transcription factor<br>1(DACH1)                     | NM_0807<br>59    | 138.1   | 170.6   | 0.02581 | 1.195 |

|         |                                                  |              |       |        |         |       |              |             |
|---------|--------------------------------------------------|--------------|-------|--------|---------|-------|--------------|-------------|
| YBEY    | ybeY metallopeptidase (putative)(YBEY)           | NM_058181    | 104.5 | 105.4  | 0.02612 | 0.81  |              |             |
| YBEY    | ybeY metallopeptidase (putative)(YBEY)           | NM_058181    | 297.8 | 252.3  | 0.02612 | 0.81  |              |             |
| YBEY    | ybeY metallopeptidase (putative)(YBEY)           | NM_058181    | 301   | 246    | 0.02612 | 0.81  |              |             |
| RNASE3  | ribonuclease A family member 3(RNASE3)           | NM_002935    | 84.8  | 183.7  | 0.0262  | 2.088 |              |             |
|         |                                                  | XM_001126483 | 127.7 | 115.4  | 0.02629 | 0.886 |              |             |
| ANXA1   | annexin A1(ANXA1)                                | NM_000700    | 270.9 | 944.9  | 0.02645 | 3.411 |              |             |
| THRSP   | thyroid hormone responsive(THRSP)                | NM_003251    | 110.3 | 389    | 0.02685 | 3.374 | NM_001107943 | 0.63 112.77 |
| EP400NL | EP400 N-terminal like(EP400NL)                   | NM_182613    | 96.8  | 110.7  | 0.02693 | 1.118 |              |             |
|         |                                                  | XM_001726438 | 141.4 | 158.5  | 0.02724 | 1.097 |              |             |
| POLR2J3 | RNA polymerase II subunit J3(POLR2J3)            | NM_001097615 | 525.7 | 409.8  | 0.02754 | 0.774 |              |             |
| HPX     | hemopexin(HPX)                                   | NM_000613    | 145.1 | 109.6  | 0.0279  | 0.737 |              |             |
| TOPBP1  | topoisomerase (DNA) II binding protein 1(TOPBP1) | NM_007027    | 110.4 | 133.2  | 0.02799 | 1.18  |              |             |
| FASN    | fatty acid synthase(FASN)                        | NM_004104    | 337   | 1891.8 | 0.02802 | 5.576 |              |             |
| COL1A2  | collagen type I alpha 2 chain(COL1A2)            | NM_000089    | 184.3 | 825.5  | 0.02838 | 4.39  |              |             |

|         |                                                          |              |       |       |         |       |           |            |
|---------|----------------------------------------------------------|--------------|-------|-------|---------|-------|-----------|------------|
| PGLYRP2 | peptidoglycan recognition protein 2(PGLYRP2)             | NM_052890    | 121.6 | 106.1 | 0.02847 | 0.852 |           |            |
| RERE    | arginine-glutamic acid dipeptide repeats(RERE)           | NM_012102    | 320.9 | 368.4 | 0.02849 | 1.153 |           |            |
| TRIM10  | tripartite motif containing 10(TRIM10)                   | NM_006778    | 123.6 | 115.6 | 0.02856 | 0.917 |           |            |
| TVP23B  | trans-golgi network vesicle protein 23 homolog B(TVP23B) | NM_016078    | 108.5 | 95.1  | 0.02884 | 0.862 |           |            |
| TVP23B  | trans-golgi network vesicle protein 23 homolog B(TVP23B) | NM_016078    | 139.9 | 133.8 | 0.02884 | 0.862 |           |            |
|         |                                                          | XM_933591    | 118.5 | 104.7 | 0.0289  | 0.867 |           |            |
|         |                                                          | XR_019367    | 144.5 | 121.6 | 0.02909 | 0.831 | NM_134372 | 22.51 0.03 |
| DDX19B  | DEAD-box helicase 19B(DDX19B)                            | NM_001014451 | 97.9  | 112.5 | 0.02916 | 1.12  |           |            |
| DDX19B  | DEAD-box helicase 19B(DDX19B)                            | NM_001014451 | 184.1 | 187.7 | 0.02916 | 1.12  |           |            |
| PPARG   | peroxisome proliferator activated receptor gamma(PPARG)  | NM_015869    | 90.1  | 115.6 | 0.02917 | 1.247 |           |            |
| PPARG   | peroxisome proliferator activated receptor gamma(PPARG)  | NM_015869    | 225.9 | 651.8 | 0.02917 | 1.247 |           |            |
| CCKAR   | cholecystokinin A receptor(CCKAR)                        | NM_000730    | 109.5 | 125.2 | 0.0293  | 1.116 |           |            |



|             |                                                     |                  |        |        |         |        |
|-------------|-----------------------------------------------------|------------------|--------|--------|---------|--------|
| FABP5       | fatty acid binding protein 5(FABP5)                 | NM_0014<br>44    | 95     | 136.3  | 0.0293  | 1.398  |
| FABP5       | fatty acid binding protein 5(FABP5)                 | NM_0014<br>44    | 240.5  | 510.9  | 0.0293  | 1.398  |
| SPRY1       | sprouty RTK signaling antagonist 1(SPRY1)           | NM_1993<br>27    | 500.4  | 756.6  | 0.02948 | 1.547  |
|             |                                                     | XM_00172<br>2644 | 116.6  | 104.8  | 0.02949 | 0.88   |
| NDUFB1<br>1 | NADH:ubiquinone oxidoreductase subunit B11(NDUFB11) | NM_0190<br>56    | 1498.6 | 1252.4 | 0.02956 | 0.842  |
|             |                                                     | XM_94396<br>4    | 119.2  | 107.1  | 0.02975 | 0.879  |
|             |                                                     | XM_29409<br>3    | 105    | 120.4  | 0.02978 | 1.117  |
| KLF10       | Kruppel like factor 10(KLF10)                       | NM_0056<br>55    | 154.5  | 141.3  | 0.02987 | 0.832  |
| KLF10       | Kruppel like factor 10(KLF10)                       | NM_0056<br>55    | 192.8  | 157.9  | 0.02987 | 0.832  |
| LGALS1      | galectin 1(LGALS1)                                  | NM_0023<br>05    | 681.2  | 1942.4 | 0.0299  | 2.938  |
| CAV2        | caveolin 2(CAV2)                                    | NM_0012<br>33    | 203.8  | 356.4  | 0.02991 | 1.732  |
| CAV2        | caveolin 2(CAV2)                                    | NM_0012<br>33    | 258    | 425.7  | 0.02991 | 1.732  |
| FABP4       | fatty acid binding protein 4(FABP4)                 | NM_0014<br>42    | 282.6  | 6897.1 | 0.03005 | 24.735 |
| DYNAP       | dynactin associated protein(DYNAP)                  | NM_1736<br>29    | 116    | 106.5  | 0.03015 | 0.899  |

|        |                                                                                        |           |        |        |         |       |              |            |
|--------|----------------------------------------------------------------------------------------|-----------|--------|--------|---------|-------|--------------|------------|
| ATP5G2 | ATP synthase, H+ transporting, mitochondrial Fo complex subunit C2 (subunit 9)(ATP5G2) | NM_005176 | 224.2  | 182.4  | 0.03039 | 0.787 |              |            |
| ATP5G2 | ATP synthase, H+ transporting, mitochondrial Fo complex subunit C2 (subunit 9)(ATP5G2) | NM_005176 | 2815.4 | 2479.8 | 0.03039 | 0.787 |              |            |
|        |                                                                                        | DB337880  | 102.2  | 119.2  | 0.03082 | 1.138 |              |            |
| PON3   | paraoxonase 3(PON3)                                                                    | NM_000940 | 111.4  | 97.8   | 0.03097 | 0.857 | NM_001031645 | 1.93 10.04 |
| CTHRC1 | collagen triple helix repeat containing 1(CTHRC1)                                      | NM_138455 | 104.2  | 140.4  | 0.03101 | 1.317 |              |            |
| AMBN   | ameloblastin(AMBN)                                                                     | NM_016519 | 108.1  | 99.6   | 0.03109 | 0.902 |              |            |
|        |                                                                                        | AI446524  | 98.8   | 116.4  | 0.03117 | 1.144 |              |            |
|        |                                                                                        | XM_932043 | 118.7  | 104.5  | 0.03119 | 0.865 |              |            |
| VN1R5  | vomer nasal 1 receptor 5 (gene/pseudogene)(VN1R5)                                      | NM_173858 | 139.3  | 123.6  | 0.03126 | 0.871 |              |            |
| FBXL8  | F-box and leucine rich repeat protein 8(FBXL8)                                         | NM_018378 | 128.1  | 152.9  | 0.0314  | 1.162 |              |            |
|        |                                                                                        | AI698256  | 112.9  | 135.6  | 0.03157 | 1.174 |              |            |

|         |                                                                         |           |       |       |         |       |           |            |
|---------|-------------------------------------------------------------------------|-----------|-------|-------|---------|-------|-----------|------------|
| OPN1SW  | opsin 1 (cone pigments),<br>short-wave-sensitive(OPN1SW)                | NM_001708 | 99.1  | 119.9 | 0.03174 | 1.179 |           |            |
|         |                                                                         | XR_037520 | 117.1 | 132.8 | 0.03186 | 1.107 |           |            |
| THYN1   | thymocyte nuclear protein 1(THYN1)                                      | NM_199297 | 140.8 | 176.6 | 0.03214 | 1.23  |           |            |
| CEACAM1 | carcinoembryonic antigen related cell adhesion molecule 1(CEACAM1)      | NM_001712 | 120   | 105   | 0.03226 | 0.858 |           |            |
| CPXM2   | carboxypeptidase X, M14 family member 2(CPXM2)                          | NM_198148 | 172.8 | 232.9 | 0.03227 | 1.31  |           |            |
| DSG2    | desmoglein 2(DSG2)                                                      | NM_001943 | 121.4 | 110.8 | 0.03236 | 0.891 |           |            |
| GID4    | GID complex subunit 4 homolog(GID4)                                     | NM_024052 | 99.4  | 115   | 0.03247 | 1.122 |           |            |
| GID4    | GID complex subunit 4 homolog(GID4)                                     | NM_024052 | 131.9 | 129.3 | 0.03247 | 1.122 | NM_144748 | 66.99 0.14 |
|         |                                                                         | XM_933382 | 133.4 | 113.7 | 0.03258 | 0.834 |           |            |
| HEYL    | hes related family bHLH transcription factor with YRPW motif-like(HEYL) | NM_014571 | 168.8 | 269.8 | 0.03269 | 1.587 |           |            |
| GSN     | gelsolin(GSN)                                                           | NM_198252 | 209.4 | 641.6 | 0.03271 | 2.981 |           |            |
| SFRP5   | secreted frizzled related protein 5(SFRP5)                              | NM_003015 | 115.7 | 135.1 | 0.03275 | 1.137 |           |            |

|         |                                                     |           |        |        |         |       |              |       |      |
|---------|-----------------------------------------------------|-----------|--------|--------|---------|-------|--------------|-------|------|
| TIPARP  | TCDD inducible poly(ADP-ribose) polymerase(TIPARP)  | NM_015508 | 396.4  | 317    | 0.03275 | 0.827 |              |       |      |
| MT1IP   | metallothionein 1I, pseudogene(MT1IP)               | NM_175621 | 1211.2 | 2412.2 | 0.03281 | 2.159 |              |       |      |
| NBPF11  | neuroblastoma breakpoint family member 11(NBPF11)   | NM_183372 | 110    | 121.4  | 0.03288 | 1.078 |              |       |      |
|         |                                                     | XM_940358 | 99.1   | 113.2  | 0.03291 | 1.106 |              |       |      |
| MID1IP1 | MID1 interacting protein 1(MID1IP1)                 | NM_021242 | 116    | 116.2  | 0.03294 | 0.815 | NM_001107793 | 77.29 | 6.85 |
| MID1IP1 | MID1 interacting protein 1(MID1IP1)                 | NM_021242 | 199.5  | 159.5  | 0.03294 | 0.815 | NM_001107793 | 77.29 | 6.85 |
|         |                                                     | XM_931329 | 118.7  | 106.5  | 0.03309 | 0.879 | NM_001107793 | 77.29 | 6.85 |
| prdm9   | PR/SET domain 9(PRDM9)                              | NM_020227 | 114    | 126.6  | 0.03339 | 1.088 | NM_001107793 | 77.29 | 6.85 |
| CALR    | calreticulin(CALR)                                  | NM_004343 | 203.4  | 172.4  | 0.03356 | 0.848 |              |       |      |
| HSPB2   | heat shock protein family B (small) member 2(HSPB2) | NM_001541 | 116.3  | 101.6  | 0.03388 | 0.858 |              |       |      |
| FABP5   | fatty acid binding protein 5(FABP5)                 | NM_001444 | 95     | 136.3  | 0.03391 | 2.085 |              |       |      |
| GAS1    | growth arrest specific 1(GAS1)                      | NM_002048 | 271    | 394.7  | 0.034   | 1.42  |              |       |      |

|                  |                                                                   |               |       |       |         |       |
|------------------|-------------------------------------------------------------------|---------------|-------|-------|---------|-------|
| TDGP1            | thymine-DNA<br>glycosylase<br>pseudogene 1(TDGP1)                 | NR_02438<br>2 | 100.4 | 115.6 | 0.03429 | 1.123 |
| IKZF2            | IKAROS family zinc<br>finger 2(IKZF2)                             | NM_0162<br>60 | 114.7 | 131.1 | 0.03431 | 1.12  |
| KCNJ4            | potassium voltage-gated<br>channel subfamily J<br>member 4(KCNJ4) | NM_1528<br>68 | 102.1 | 120.4 | 0.0344  | 1.139 |
| KCNJ4            | potassium voltage-gated<br>channel subfamily J<br>member 4(KCNJ4) | NM_1528<br>68 | 108.7 | 117.6 | 0.0344  | 1.139 |
| GCK              | glucokinase(GCK)                                                  | NM_0335<br>08 | 86.1  | 106.6 | 0.03459 | 1.21  |
| CIDEc            | cell death inducing<br>DFFA like effector<br>c(CIDEc)             | NM_0220<br>94 | 104.1 | 301.9 | 0.03469 | 2.79  |
| CIDEc            | cell death inducing<br>DFFA like effector<br>c(CIDEc)             | NM_0220<br>94 | 105   | 119.1 | 0.03469 | 2.79  |
| GSTA1            | glutathione S-<br>transferase alpha<br>1(GSTA1)                   | NM_1457<br>40 | 107.6 | 99.2  | 0.03469 | 0.683 |
| GSTA1            | glutathione S-<br>transferase alpha<br>1(GSTA1)                   | NM_1457<br>40 | 148.6 | 104.7 | 0.03469 | 0.683 |
| LOC101<br>927635 | uncharacterized<br>LOC101927635(LOC10<br>1927635)                 | BG119374      | 122.9 | 109.5 | 0.03525 | 0.87  |

|            |                                                                          |                  |       |       |         |       |
|------------|--------------------------------------------------------------------------|------------------|-------|-------|---------|-------|
|            | melanocortin 2 receptor<br>accessory<br>protein(MRAP)                    | NM_1788<br>17    | 114.3 | 198.3 | 0.03526 | 1.676 |
| mrp        |                                                                          |                  |       |       |         |       |
| RNASE2     | ribonuclease A family<br>member 2(RNASE2)                                | NM_0029<br>34    | 92.9  | 130.1 | 0.03553 | 1.361 |
|            |                                                                          | XM_94076<br>4    | 98.8  | 117.4 | 0.03563 | 1.164 |
| fgl1       | fibrinogen like 1(FGL1)                                                  | NM_2015<br>53    | 167.9 | 116   | 0.03579 | 0.671 |
| COL6A2     | collagen type VI alpha 2<br>chain(COL6A2)                                | NM_0018<br>49    | 167.7 | 217   | 0.03627 | 1.269 |
| COL6A2     | collagen type VI alpha 2<br>chain(COL6A2)                                | NM_0018<br>49    | 189.9 | 306.3 | 0.03627 | 1.269 |
| CACNG<br>2 | calcium voltage-gated<br>channel auxiliary<br>subunit gamma<br>2(CACNG2) | NM_0060<br>78    | 102.5 | 91.8  | 0.03629 | 0.879 |
| NCALD      | neurocalcin<br>delta(NCALD)                                              | NM_0320<br>41    | 304.1 | 452   | 0.03661 | 1.512 |
|            |                                                                          | XR_03877<br>6    | 132.3 | 116.8 | 0.03678 | 0.866 |
| RNF146     | ring finger protein<br>146(RNF146)                                       | NM_0309<br>63    | 117.2 | 104.1 | 0.0368  | 0.867 |
| RNF146     | ring finger protein<br>146(RNF146)                                       | NM_0309<br>63    | 152.3 | 145.6 | 0.0368  | 0.867 |
| COL6A2     | collagen type VI alpha 2<br>chain(COL6A2)                                | NM_0018<br>49    | 167.7 | 217   | 0.03704 | 1.571 |
|            |                                                                          | XM_00171<br>6052 | 117.9 | 108.2 | 0.03716 | 0.902 |

|           |                                                     |                  |        |        |         |       |                  |               |
|-----------|-----------------------------------------------------|------------------|--------|--------|---------|-------|------------------|---------------|
| c12orf4   | chromosome 12 open reading frame 4(C12orf4)         | NM_0203<br>74    | 140.5  | 125.3  | 0.03717 | 0.872 |                  |               |
| MT1P3     | metallothionein 1 pseudogene 3(MT1P3)               | NM_0807<br>57    | 1313.1 | 2470.2 | 0.03767 | 1.995 |                  |               |
| NDUFA10   | NADH:ubiquinone oxidoreductase subunit A10(NDUFA10) | NM_0045<br>44    | 103.7  | 111.8  | 0.03787 | 1.25  |                  |               |
| NDUFA10   | NADH:ubiquinone oxidoreductase subunit A10(NDUFA10) | NM_0045<br>44    | 105.1  | 133.8  | 0.03787 | 1.25  |                  |               |
| GAGE4     | G antigen 4(GAGE4)                                  | NM_0014<br>74    | 103    | 124.1  | 0.03808 | 1.171 |                  |               |
| MIR1185-1 | microRNA 1185-1(MIR1185-1)                          | NR_03157<br>5    | 138.9  | 155.8  | 0.03814 | 1.092 |                  |               |
| NUGGC     | nuclear GTPase, germinal center associated(NUGGC)   | NM_0010<br>10906 | 117.8  | 104.9  | 0.03852 | 0.872 |                  |               |
| ZNF585A   | zinc finger protein 585A(ZNF585A)                   | NM_1991<br>26    | 137.4  | 117.7  | 0.0386  | 0.834 |                  |               |
| BPY2B     | basic charge, Y-linked, 2B(BPY2B)                   | NM_0010<br>02760 | 111.9  | 101.8  | 0.03865 | 0.89  | NM_001<br>009603 | 28.32<br>0.90 |
| GMFB      | glia maturation factor beta(GMFB)                   | NM_0041<br>24    | 114.4  | 134.3  | 0.03872 | 1.145 |                  |               |
| igsf11    | immunoglobulin superfamily member 11(IGSF11)        | NM_1525<br>38    | 121.3  | 145.2  | 0.03895 | 1.171 |                  |               |
|           |                                                     | XM_93816<br>6    | 161.6  | 291.2  | 0.03911 | 1.759 |                  |               |

|        |                                              |              |        |        |         |       |
|--------|----------------------------------------------|--------------|--------|--------|---------|-------|
| NLRP1  | NLR family pyrin domain containing 1(NLRP1)  | NM_033007    | 113    | 105.6  | 0.03931 | 0.916 |
|        |                                              | XM_001130020 | 130.6  | 118.2  | 0.0394  | 0.898 |
| PHF10  | PHD finger protein 10(PHF10)                 | NM_133325    | 120.3  | 140.2  | 0.03946 | 1.133 |
| CD36   | CD36 molecule(CD36)                          | NM_000072    | 183.5  | 1068.4 | 0.03979 | 5.653 |
| WWOX   | WW domain containing oxidoreductase(WWOX)    | NM_130791    | 123.6  | 141.3  | 0.03993 | 1.113 |
| ALB    | albumin(ALB)                                 | NM_000477    | 1072.9 | 336.1  | 0.03999 | 0.286 |
| ALB    | albumin(ALB)                                 | NM_000477    | 1474.5 | 661.3  | 0.03999 | 0.286 |
| FGF18  | fibroblast growth factor 18(FGF18)           | NM_003862    | 119.7  | 111.1  | 0.04018 | 0.911 |
| TRAF4  | TNF receptor associated factor 4(TRAF4)      | NM_004295    | 117.9  | 106.1  | 0.04081 | 0.879 |
| TNN    | tenascin N(TNN)                              | NM_022093    | 113.7  | 137.7  | 0.04092 | 1.184 |
| CDKN2C | cyclin dependent kinase inhibitor 2C(CDKN2C) | NM_078626    | 151.8  | 336.4  | 0.04102 | 2.146 |
|        |                                              | XM_001721172 | 177.4  | 313.4  | 0.04104 | 1.74  |
| PODN   | podocan(PODN)                                | NM_153703    | 104.5  | 134.7  | 0.04122 | 1.26  |



|             |                                                                      |                  |       |       |         |       |
|-------------|----------------------------------------------------------------------|------------------|-------|-------|---------|-------|
|             | family with sequence<br>similarity 19 member A4,                     |                  |       |       |         |       |
| FAM19A<br>4 | C-C motif chemokine<br>like(FAM19A4)                                 | NM_0010<br>05527 | 103.4 | 115.9 | 0.04132 | 1.097 |
|             | family with sequence<br>similarity 19 member A4,                     |                  |       |       |         |       |
| FAM19A<br>4 | C-C motif chemokine<br>like(FAM19A4)                                 | NM_0010<br>05527 | 106.9 | 121.3 | 0.04132 | 1.097 |
|             |                                                                      | XM_29098<br>5    | 103.8 | 126.5 | 0.04149 | 1.18  |
| GLRB        | glycine receptor<br>beta(GLRB)                                       | NM_0008<br>24    | 146.3 | 255.4 | 0.04167 | 1.678 |
|             | transient receptor<br>potential cation channel<br>subfamily V member |                  |       |       |         |       |
| TRPV4<br>4  | (TRPV4)                                                              | NM_0216<br>25    | 132.3 | 110.5 | 0.04167 | 0.823 |
|             |                                                                      | XM_00172<br>6471 | 109.8 | 137.9 | 0.04173 | 1.23  |
| ORM1        | orosomucoid 1(ORM1)                                                  | NM_0006<br>07    | 141.1 | 97.6  | 0.04187 | 0.671 |
|             | TGF-beta activated<br>kinase 1/MAP3K7<br>binding protein 3(TAB3)     |                  |       |       |         |       |
| TAB3        |                                                                      | NM_1527<br>87    | 99.3  | 113.8 | 0.04197 | 1.117 |
|             |                                                                      | XR_01765<br>9    | 96.9  | 113.8 | 0.042   | 1.133 |
| SLC1A2      | solute carrier family 1<br>member 2(SLC1A2)                          | NM_0041<br>71    | 118.3 | 106.1 | 0.04214 | 0.883 |
| PCBP2       | poly(rC) binding protein<br>2(PCBP2)                                 | NM_0011<br>28913 | 115.9 | 101.3 | 0.04224 | 0.853 |

|             |                                                                             |                  |        |        |         |       |
|-------------|-----------------------------------------------------------------------------|------------------|--------|--------|---------|-------|
| ZIC4        | Zic family member<br>4(ZIC4)                                                | NM_0321<br>53    | 122.2  | 112.7  | 0.04233 | 0.905 |
|             |                                                                             | AW04461<br>5     | 109.8  | 100.2  | 0.04238 | 0.893 |
| TIGD6       | tigger transposable<br>element derived<br>6(TIGD6)                          | NM_0309<br>53    | 121.5  | 114.4  | 0.04251 | 0.921 |
| LY9         | lymphocyte antigen<br>9(LY9)                                                | NM_0010<br>33667 | 84.8   | 125.1  | 0.04273 | 1.441 |
| GC          | GC, vitamin D binding<br>protein(GC)                                        | NM_0005<br>83    | 172    | 110    | 0.04291 | 0.619 |
| abl1        | ABL proto-oncogene 1,<br>non-receptor tyrosine<br>kinase(ABL1)              | NM_0051<br>57    | 591.2  | 660.4  | 0.043   | 1.125 |
| PCYOX1      | prenylcysteine oxidase<br>1(PCYOX1)                                         | NM_0162<br>97    | 132.5  | 160.6  | 0.04301 | 1.181 |
| PCYOX1      | prenylcysteine oxidase<br>1(PCYOX1)                                         | NM_0162<br>97    | 505.8  | 655.5  | 0.04301 | 1.181 |
| CRCP        | CGRP receptor<br>component(CRCP)                                            | NM_0144<br>78    | 116.7  | 110.1  | 0.04322 | 1.398 |
| CRCP        | CGRP receptor<br>component(CRCP)                                            | NM_0144<br>78    | 2497.8 | 3480.4 | 0.04322 | 1.398 |
| FAM124<br>A | family with sequence<br>similarity 124 member<br>A(FAM124A)                 | NM_1450<br>19    | 111.8  | 103.6  | 0.04331 | 0.906 |
| FGB         | fibrinogen beta<br>chain(FGB)                                               | NM_0051<br>41    | 113.2  | 95.6   | 0.04334 | 0.827 |
| PTAR1       | protein<br>prenyltransferase alpha<br>subunit repeat<br>containing 1(PTAR1) | NM_0010<br>99666 | 203.8  | 240    | 0.04337 | 1.149 |

|         |                                                                        |                  |       |       |         |       |
|---------|------------------------------------------------------------------------|------------------|-------|-------|---------|-------|
| FAM196A | family with sequence<br>similarity 196 member<br>A(FAM196A)            | NM_0010<br>39762 | 85.1  | 111.8 | 0.04343 | 1.271 |
| FGG     | fibrinogen gamma<br>chain(FGG)                                         | NM_0005<br>09    | 188.8 | 94.8  | 0.04344 | 0.479 |
|         |                                                                        | XM_94465<br>4    | 107.9 | 120.1 | 0.04361 | 1.086 |
| FAM3D   | family with sequence<br>similarity 3 member<br>D(FAM3D)                | NM_1388<br>05    | 135.4 | 120.8 | 0.04408 | 0.881 |
| GBGT1   | globoside alpha-1,3-N-<br>acetylgalactosaminyltra<br>nsferase 1(GBGT1) | NM_0219<br>96    | 102.9 | 119.4 | 0.04427 | 1.135 |
| CADM3   | cell adhesion molecule<br>3(CADM3)                                     | NM_0211<br>89    | 102.8 | 120.9 | 0.04434 | 1.143 |
| AGPAT2  | 1-acylglycerol-3-<br>phosphate O-<br>acyltransferase<br>2(AGPAT2)      | NM_0010<br>12727 | 138.4 | 213.5 | 0.04444 | 1.507 |
|         |                                                                        | NM_1982<br>89    | 121.8 | 596.8 | 0.0445  | 4.655 |
|         |                                                                        | AA906391         | 145.2 | 172.4 | 0.04457 | 1.17  |
| TGM5    | transglutaminase<br>5(TGM5)                                            | NM_2016<br>31    | 104.3 | 116.6 | 0.04462 | 1.094 |
| CASKIN2 | CASK interacting protein<br>2(CASKIN2)                                 | NM_0207<br>53    | 116.9 | 108   | 0.04484 | 0.905 |
|         |                                                                        | AK002088         | 91.1  | 105.7 | 0.045   | 1.129 |
|         |                                                                        | XM_00172<br>5227 | 115   | 135.7 | 0.04521 | 1.147 |

|           |                                                            |              |        |        |         |        |
|-----------|------------------------------------------------------------|--------------|--------|--------|---------|--------|
| PNPLA2    | patatin like phospholipase domain containing 2(PNPLA2)     | NM_020376    | 282.3  | 634.6  | 0.04534 | 2.133  |
| NACA      | nascent polypeptide-associated complex alpha subunit(NACA) | NM_005594    | 4000.5 | 3255.1 | 0.04555 | 0.822  |
| NACA      | nascent polypeptide-associated complex alpha subunit(NACA) | NM_005594    | 5969.1 | 5262.2 | 0.04555 | 0.822  |
| METRN     | meteorin, glial cell differentiation regulator(METRN)      | NM_024042    | 129.9  | 108    | 0.04557 | 0.821  |
| JADE1     | jade family PHD finger 1(JADE1)                            | NM_024900    | 215    | 183.4  | 0.04598 | 0.844  |
| CIDEA     | cell death-inducing DFFA-like effector a(CIDEA)            | NM_001279    | 101.9  | 1110.9 | 0.04601 | 10.315 |
| ADGRB1    | adhesion G protein-coupled receptor B1(ADGRB1)             | NM_001702    | 123.6  | 111.7  | 0.04606 | 0.883  |
| PLCL1     | phospholipase C like 1(PLCL1)                              | NM_006226    | 116.7  | 104.4  | 0.04609 | 0.884  |
| C14orf180 | chromosome 14 open reading frame 180(C14orf180)            | NM_001008404 | 93.9   | 124.9  | 0.04611 | 1.3    |
| CAV1      | caveolin 1(CAV1)                                           | NM_001753    | 157.8  | 503.2  | 0.04625 | 3.01   |
| CAV1      | caveolin 1(CAV1)                                           | NM_001753    | 159    | 206.6  | 0.04625 | 3.01   |

|         |                                                                |                  |        |        |         |       |
|---------|----------------------------------------------------------------|------------------|--------|--------|---------|-------|
| ALDOC   | aldolase, fructose-<br>biphosphate<br>C(ALDOC)                 | NM_0051<br>65    | 342    | 1042.5 | 0.04629 | 2.928 |
| TDRD1   | tudor domain containing<br>1(TDRD1)                            | NM_1987<br>95    | 194.2  | 244.2  | 0.04638 | 1.388 |
| TDRD1   | tudor domain containing<br>1(TDRD1)                            | NM_1987<br>95    | 247.7  | 334.6  | 0.04638 | 1.388 |
| YTHDF2  | YTH N6-<br>methyladenosine RNA<br>binding protein<br>2(YTHDF2) | NM_0162<br>58    | 288.1  | 238.7  | 0.04649 | 0.845 |
| PSMD8   | proteasome 26S<br>subunit, non-ATPase<br>8(PSMD8)              | NM_0028<br>12    | 333.6  | 278.8  | 0.0467  | 0.828 |
| UBN2    | ubiquitin 2(UBN2)                                              | NM_1735<br>69    | 161.5  | 187.1  | 0.04678 | 1.142 |
| UBN2    | ubiquitin 2(UBN2)                                              | NM_1735<br>69    | 234.7  | 243    | 0.04678 | 1.142 |
| ADIRF   | adipogenesis regulatory<br>factor(ADIRF)                       | NM_0068<br>29    | 2009.5 | 3414.7 | 0.0469  | 1.753 |
| c2orf42 | chromosome 2 open<br>reading frame<br>42(C2orf42)              | NM_0178<br>80    | 125.3  | 110    | 0.04719 | 0.861 |
| MAR2    | membrane associated<br>ring-CH-type finger<br>2(MARCH2)        | NM_0010<br>05416 | 114.7  | 132    | 0.04764 | 1.121 |
| MAR2    | membrane associated<br>ring-CH-type finger<br>2(MARCH2)        | NM_0010<br>05416 | 154    | 163.8  | 0.04764 | 1.121 |

|           |                                                                      |              |        |        |         |       |
|-----------|----------------------------------------------------------------------|--------------|--------|--------|---------|-------|
| NPSR1-AS1 | NPSR1 antisense RNA 1(NPSR1-AS1)                                     | NM_207285    | 136.8  | 127.8  | 0.04773 | 0.915 |
|           |                                                                      | XM_001130790 | 132.7  | 630.3  | 0.04805 | 4.52  |
| ZNF652    | zinc finger protein 652(ZNF652)                                      | NM_014897    | 4290.7 | 5557.2 | 0.04818 | 1.309 |
| KCNV2     | potassium voltage-gated channel modifier subfamily V member 2(KCNV2) | NM_133497    | 102.7  | 117.1  | 0.04832 | 1.107 |
|           |                                                                      | XR_015597    | 94.3   | 112.9  | 0.04842 | 1.166 |
| HECTD2    | HECT domain E3 ubiquitin protein ligase 2(HECTD2)                    | NM_182765    | 137.6  | 138    | 0.04849 | 0.862 |
| HECTD2    | HECT domain E3 ubiquitin protein ligase 2(HECTD2)                    | NM_182765    | 143.7  | 126.4  | 0.04849 | 0.862 |
| TAF6      | TATA-box binding protein associated factor 6(TAF6)                   | NM_005641    | 113.1  | 126.7  | 0.04867 | 1.089 |
|           |                                                                      | XM_001131201 | 110.9  | 126.7  | 0.04884 | 1.106 |
| c1orf216  | chromosome 1 open reading frame 216(C1orf216)                        | NM_152374    | 123.1  | 139.7  | 0.04918 | 1.104 |
|           |                                                                      | XM_001732853 | 113.6  | 104.2  | 0.04945 | 0.896 |
|           |                                                                      | CK299443     | 155.9  | 140.5  | 0.04954 | 0.888 |

|        |                                                               |               |        |        |         |       |
|--------|---------------------------------------------------------------|---------------|--------|--------|---------|-------|
| PPARG  | peroxisome proliferator<br>activated receptor<br>gamma(PPARG) | NM_1387<br>12 | 116.5  | 275.5  | 0.04973 | 2.294 |
| PLTP   | phospholipid transfer<br>protein(PLTP)                        | NM_1826<br>76 | 205.3  | 322.8  | 0.04998 | 1.567 |
| APOPT1 | apoptogenic 1,<br>mitochondrial(APOPT1)                       | NM_0323<br>74 | 1407.8 | 1812.9 | 0.05    | 1.328 |

| Gene<br>Symbol | Gene Name                                                         | Accessio<br>n No. | IUGR<br>Chow F<br>Mean | IUGR<br>HFHS F<br>Mean | p-val<br>IUGR F<br>HFHS vs.<br>IUGR F<br>Chow | Ratio<br>IUGR F<br>HFHS vs.<br>IUGR F<br>Chow | REFSEQ<br>ID | NEPHRON<br>(MEAN<br>RPKM) | COLLECTIN<br>G DUCT<br>(MEAN<br>RPKM) |
|----------------|-------------------------------------------------------------------|-------------------|------------------------|------------------------|-----------------------------------------------|-----------------------------------------------|--------------|---------------------------|---------------------------------------|
|                |                                                                   | XR_03895<br>1     | 520.6                  | 329.4                  | 0.00017                                       | 0.656                                         |              |                           |                                       |
| FNTB           | farnesyltransferase,<br>CAAX box, beta(FNTB)                      | NM_0020<br>28     | 399.5                  | 281.9                  | 0.00023                                       | 0.724                                         |              |                           |                                       |
| CCT7           | chaperonin containing<br>TCP1 subunit 7(CCT7)                     | NM_0064<br>29     | 644.7                  | 445.7                  | 0.00104                                       | 0.745                                         |              |                           |                                       |
| ODC1           | ornithine decarboxylase<br>1(ODC1)                                | NM_0025<br>39     | 725.5                  | 484.4                  | 0.0011                                        | 0.726                                         |              |                           |                                       |
|                |                                                                   | XM_00171<br>9540  | 150.1                  | 130.9                  | 0.00111                                       | 0.859                                         |              |                           |                                       |
| ACTR5          | ARP5 actin-related<br>protein 5<br>homolog(ACTR5)                 | NM_0248<br>55     | 134                    | 122.4                  | 0.00143                                       | 0.885                                         |              |                           |                                       |
| EIF3M          | eukaryotic translation<br>initiation factor 3 subunit<br>M(EIF3M) | NM_0063<br>60     | 464.5                  | 327.5                  | 0.00153                                       | 0.655                                         |              |                           |                                       |

|          |                                               |              |        |        |         |       |           |        |      |
|----------|-----------------------------------------------|--------------|--------|--------|---------|-------|-----------|--------|------|
|          | eukaryotic translation initiation factor      | NM_001416    | 586.5  | 372.4  | 0.00153 | 0.655 |           |        |      |
| EIF4A1   | 4A1(EIF4A1)                                   |              |        |        |         |       |           |        |      |
|          |                                               | XM_934376    | 149.6  | 133.4  | 0.00194 | 0.875 | NM_017193 | 356.13 | 8.18 |
| FLJ41170 | uncharacterized LOC440200(FLJ41170)           | NM_001004332 | 183.1  | 236.5  | 0.00197 | 1.391 | NM_017193 | 356.13 | 8.18 |
|          |                                               | XM_001713654 | 9306.3 | 6648.7 | 0.00201 | 0.835 | NM_017193 | 356.13 | 8.18 |
| RPS26P11 | ribosomal protein S26 pseudogene 11(RPS26P11) | NR_002309    | 9176.8 | 5893.9 | 0.00255 | 0.745 | NM_017193 | 356.13 | 8.18 |
| SMAGP    | small cell adhesion glycoprotein(SMAGP)       | NM_001033873 | 235.3  | 188.5  | 0.00284 | 0.826 |           |        |      |
| JAM2     | junctional adhesion molecule 2(JAM2)          | NM_021219    | 130    | 158    | 0.003   | 1.202 |           |        |      |
| RPS3A    | ribosomal protein S3A(RPS3A)                  | NM_001006    | 8852.1 | 6542.5 | 0.00312 | 0.75  |           |        |      |
| RPS3A    | ribosomal protein S3A(RPS3A)                  | NM_001006    | 9567.1 | 7835.2 | 0.00312 | 0.75  |           |        |      |
| RPS3A    | ribosomal protein S3A(RPS3A)                  | NM_001006    | 9708   | 6189.4 | 0.00312 | 0.75  |           |        |      |
| IFT52    | intraflagellar transport 52(IFT52)            | NM_016004    | 203.8  | 268.1  | 0.00337 | 1.368 |           |        |      |
|          |                                               | BU928253     | 128.8  | 153.7  | 0.00349 | 1.144 |           |        |      |
| POMP     | proteasome maturation protein(POMP)           | NM_015932    | 536.2  | 386.2  | 0.00355 | 0.746 |           |        |      |
| MSLNL    | mesothelin-like(MSLNL)                        | NM_001025190 | 114.5  | 148.6  | 0.00364 | 1.22  |           |        |      |



|        |                                                       |          |        |        |         |       |
|--------|-------------------------------------------------------|----------|--------|--------|---------|-------|
| MSLNL  | mesothelin-like(MSLNL)                                | NM_0010  |        |        |         |       |
|        |                                                       | 25190    | 123.2  | 139.9  | 0.00364 | 1.22  |
|        |                                                       | AA759151 | 111    | 135.2  | 0.00375 | 1.166 |
|        |                                                       | XM_92751 |        |        |         |       |
|        |                                                       | 1        | 128.4  | 119.5  | 0.00389 | 0.899 |
| PDPK1  | 3-phosphoinositide dependent protein kinase 1(PDPK1)  | NM_0312  |        |        |         |       |
|        |                                                       | 68       | 139.4  | 122.7  | 0.00392 | 0.869 |
| PDPK1  | 3-phosphoinositide dependent protein kinase 1(PDPK1)  | NM_0312  |        |        |         |       |
|        |                                                       | 68       | 574    | 543.4  | 0.00392 | 0.869 |
|        |                                                       | CA433902 | 187.2  | 222.9  | 0.00423 | 1.229 |
| PPP1CC | protein phosphatase 1 catalytic subunit gamma(PPP1CC) | NM_0027  |        |        |         |       |
|        |                                                       | 10       | 2359.4 | 1509.3 | 0.00427 | 0.709 |
|        |                                                       | XM_94395 |        |        |         |       |
|        |                                                       | 6        | 110.5  | 132.6  | 0.00429 | 1.135 |
| TRIM36 | tripartite motif containing 36(TRIM36)                | NM_0010  |        |        |         |       |
|        |                                                       | 17397    | 133    | 157    | 0.00445 | 1.145 |
| CLUL1  | clusterin like 1(CLUL1)                               | NM_0144  |        |        |         |       |
|        |                                                       | 10       | 325.6  | 432.9  | 0.0045  | 1.482 |
| NETO1  | neuropilin and tolloid like 1(NETO1)                  | AK123319 | 136.2  | 119.8  | 0.00453 | 0.846 |
| SNORA1 | small nucleolar RNA, H/ACA box 1(SNORA1)              | NR_00302 |        |        |         |       |
|        |                                                       | 6        | 128.2  | 113.9  | 0.00483 | 0.853 |
|        |                                                       | XM_94178 |        |        |         |       |
|        |                                                       | 5        | 106.4  | 126.8  | 0.00491 | 1.122 |
| NGEF   | neuronal guanine nucleotide exchange factor(NGEF)     | NM_0198  |        |        |         |       |
|        |                                                       | 50       | 164.2  | 201.6  | 0.00498 | 1.231 |

|        |                                                                 |               |         |        |         |       |
|--------|-----------------------------------------------------------------|---------------|---------|--------|---------|-------|
| MT1H   | metallothionein<br>1H(MT1H)                                     | NM_0059<br>51 | 97.7    | 143.8  | 0.00502 | 1.354 |
| MT1H   | metallothionein<br>1H(MT1H)                                     | NM_0059<br>51 | 1671.5  | 4509.3 | 0.00502 | 1.354 |
|        |                                                                 | XR_01841<br>2 | 132.9   | 120.8  | 0.00508 | 0.874 |
| MAIP1  | matrix AAA peptidase<br>interacting protein<br>1(MAIP1)         | NM_0245<br>20 | 232.1   | 168.4  | 0.00533 | 0.726 |
| CREB1  | cAMP responsive<br>element binding protein<br>1(CREB1)          | NM_0043<br>79 | 119.2   | 126.4  | 0.00542 | 1.623 |
| CREB1  | cAMP responsive<br>element binding protein<br>1(CREB1)          | NM_0043<br>79 | 1238.6  | 1821.8 | 0.00542 | 1.623 |
| CREB1  | cAMP responsive<br>element binding protein<br>1(CREB1)          | NM_0043<br>79 | 11307.8 | 13499  | 0.00542 | 1.623 |
|        |                                                                 | XM_93875<br>5 | 2625.7  | 1447   | 0.00543 | 0.639 |
| neurl4 | neuralized E3 ubiquitin<br>protein ligase<br>4(NEURL4)          | NM_0324<br>42 | 261     | 323.4  | 0.00549 | 1.313 |
| FAAP20 | Fanconi anemia core<br>complex associated<br>protein 20(FAAP20) | NM_1825<br>33 | 118.1   | 149.6  | 0.00564 | 1.211 |
| FAAP24 | Fanconi anemia core<br>complex associated<br>protein 24(FAAP24) | NM_1522<br>66 | 169.3   | 171.7  | 0.00564 | 1.211 |
| IARS   | isoleucyl-tRNA<br>synthetase(IARS)                              | NM_0021<br>61 | 2887.6  | 3967.8 | 0.00567 | 1.516 |

|             |                                                                     |                  |       |       |         |       |
|-------------|---------------------------------------------------------------------|------------------|-------|-------|---------|-------|
| ZNF584      | zinc finger protein<br>584(ZNF584)                                  | NM_1735<br>48    | 132.1 | 160.3 | 0.00573 | 1.165 |
|             |                                                                     | XM_00172<br>0172 | 722   | 461.2 | 0.00594 | 0.674 |
| USP21       | ubiquitin specific<br>peptidase 21(USP21)                           | NM_0124<br>75    | 142.8 | 137.2 | 0.00597 | 0.822 |
| USP21       | ubiquitin specific<br>peptidase 21(USP21)                           | NM_0124<br>75    | 217.3 | 175.3 | 0.00597 | 0.822 |
| BCL2        | BCL2, apoptosis<br>regulator(BCL2)                                  | NM_0006<br>33    | 138.4 | 127.4 | 0.00605 | 0.641 |
| BCL2L1      | BCL2 like 1(BCL2L1)                                                 | NM_1385<br>78    | 424   | 265.5 | 0.00605 | 0.641 |
| RFX5        | regulatory factor<br>X5(RFX5)                                       | NM_0010<br>25603 | 141.5 | 114.3 | 0.00609 | 0.79  |
|             |                                                                     | XR_03739<br>8    | 261   | 192.5 | 0.00621 | 0.731 |
|             |                                                                     | XR_03750<br>8    | 200.3 | 165.4 | 0.00641 | 0.84  |
| PITPNC<br>1 | phosphatidylinositol<br>transfer protein,<br>cytoplasmic 1(PITPNC1) | NM_1816<br>71    | 201.7 | 153.3 | 0.00649 | 0.773 |
| POLE3       | DNA polymerase<br>epsilon 3, accessory<br>subunit(POLE3)            | NM_0174<br>43    | 402.9 | 289.5 | 0.00651 | 0.744 |
| rbm12       | RNA binding motif<br>protein 12(RBM12)                              | NM_0060<br>47    | 163.5 | 137.4 | 0.00683 | 0.832 |
| rbm12       | RNA binding motif<br>protein 12(RBM12)                              | NM_0060<br>47    | 216.6 | 170.7 | 0.00683 | 0.832 |
| TMEM50<br>B | transmembrane protein<br>50B(TMEM50B)                               | NM_0061<br>34    | 177.2 | 216.2 | 0.00683 | 1.283 |

|             |                                                      |                  |       |        |         |       |
|-------------|------------------------------------------------------|------------------|-------|--------|---------|-------|
| TMEM50<br>B | transmembrane protein<br>50B(TMEM50B)                | NM_0061<br>34    | 568   | 512.4  | 0.00683 | 1.283 |
| MSMO1       | methylsterol<br>monooxygenase<br>1(MSMO1)            | NM_0010<br>17369 | 108.6 | 129.1  | 0.00689 | 1.131 |
| MSMO1       | methylsterol<br>monooxygenase<br>1(MSMO1)            | NM_0010<br>17369 | 230.5 | 219.5  | 0.00689 | 1.131 |
|             |                                                      | XM_93764<br>8    | 134.9 | 162.9  | 0.0071  | 1.181 |
| SLC35A<br>2 | solute carrier family 35<br>member A2(SLC35A2)       | NM_0010<br>32289 | 139.6 | 129.3  | 0.00729 | 0.906 |
| SLC35A<br>2 | solute carrier family 35<br>member A2(SLC35A2)       | NM_0010<br>32289 | 409.1 | 388.8  | 0.00729 | 0.906 |
| cyb5r3      | cytochrome b5<br>reductase 3(CYB5R3)                 | NM_0003<br>98    | 170.6 | 150.8  | 0.00731 | 0.877 |
|             |                                                      | XM_00112<br>8786 | 505.2 | 1486.6 | 0.00756 | 3.49  |
| MIR1253     | microRNA<br>1253(MIR1253)                            | NR_03165<br>4    | 191.4 | 221.4  | 0.00782 | 1.2   |
| VAV3        | vav guanine nucleotide<br>exchange factor<br>3(VAV3) | NM_0061<br>13    | 163.6 | 141.1  | 0.00788 | 0.854 |
| VAV3        | vav guanine nucleotide<br>exchange factor<br>3(VAV3) | NM_0061<br>13    | 282.9 | 264.9  | 0.00788 | 0.854 |
| VAV3        | vav guanine nucleotide<br>exchange factor<br>3(VAV3) | NM_0061<br>13    | 495.5 | 559.3  | 0.00788 | 0.854 |

|           |                                                   |           |        |        |         |       |              |       |       |
|-----------|---------------------------------------------------|-----------|--------|--------|---------|-------|--------------|-------|-------|
|           | olfactory receptor family<br>2 subfamily G member | NM_0010   |        |        |         |       |              |       |       |
| OR2G2     | 2(OR2G2)                                          | 01915     | 167.2  | 202.2  | 0.00793 | 1.277 |              |       |       |
|           | ribosomal protein                                 | NM_0071   |        |        |         |       | NM_053       |       |       |
| RPL10A    | L10a(RPL10A)                                      | 04        | 1974.5 | 1104.7 | 0.00797 | 0.627 | 502          | 4.02  | 18.01 |
|           | ribosomal protein                                 | NM_0071   |        |        |         |       | NM_053       |       |       |
| RPL10A    | L10a(RPL10A)                                      | 04        | 6681.9 | 5179.3 | 0.00797 | 0.627 | 502          | 4.02  | 18.01 |
|           |                                                   | XR_01535  |        |        |         |       | NM_053       |       |       |
|           |                                                   | 1         | 119.9  | 140.9  | 0.00801 | 1.154 | 502          | 4.02  | 18.01 |
|           | DEAH-box helicase                                 | NM_0246   |        |        |         |       | NM_053       |       |       |
| DHX40     | 40(DHX40)                                         | 12        | 172.7  | 146.6  | 0.00811 | 0.847 | 502          | 4.02  | 18.01 |
|           | DEAH-box helicase                                 | NM_0246   |        |        |         |       |              |       |       |
| DHX40     | 40(DHX40)                                         | 12        | 182.5  | 176.2  | 0.00811 | 0.847 |              |       |       |
|           | DEAH-box helicase                                 | NM_0246   |        |        |         |       |              |       |       |
| DHX40     | 40(DHX40)                                         | 12        | 196.8  | 215.6  | 0.00811 | 0.847 |              |       |       |
| MIR1185-1 | microRNA 1185-1(MIR1185-1)                        | NR_031575 | 141.9  | 164.5  | 0.00818 | 1.135 |              |       |       |
|           |                                                   | XM_92623  |        |        |         |       |              |       |       |
|           |                                                   | 1         | 244.2  | 159.5  | 0.00818 | 0.666 |              |       |       |
|           | SPARC related modular calcium binding             | NM_0010   |        |        |         |       |              |       |       |
| SMOC1     | 1(SMOC1)                                          | 34852     | 122.7  | 148.9  | 0.00865 | 1.179 |              |       |       |
|           | SPARC related modular calcium binding             | NM_0010   |        |        |         |       |              |       |       |
| SMOC1     | 1(SMOC1)                                          | 34852     | 132.9  | 136.2  | 0.00865 | 1.179 |              |       |       |
|           |                                                   |           |        |        |         |       |              |       |       |
| ANKRD10   | ankyrin repeat domain 10(ANKRD10)                 | NM_017664 | 229.6  | 204.5  | 0.00871 | 0.87  | NM_001009670 | 33.30 | 2.04  |
|           | ankyrin repeat family A member 2(ANKRA2)          | NM_023039 | 150    | 135.5  | 0.00871 | 0.87  |              |       |       |

|             |                                                                                         |                  |        |        |         |       |
|-------------|-----------------------------------------------------------------------------------------|------------------|--------|--------|---------|-------|
|             |                                                                                         | XR_01839<br>4    | 1706   | 752.9  | 0.00882 | 0.475 |
|             | prolyl-tRNA synthetase<br>associated domain<br>containing 1,<br>pseudogene(PRORS1<br>P) | NM_0010<br>80459 | 157.9  | 134.1  | 0.00901 | 0.828 |
| prorsd1p    |                                                                                         | NM_0161<br>51    | 214.1  | 253.9  | 0.00906 | 1.273 |
| TAOK2       | TAO kinase 2(TAOK2)                                                                     | XR_03889<br>8    | 250    | 168.4  | 0.00906 | 0.659 |
| MCMDC<br>2  | minichromosome<br>maintenance domain<br>containing 2(MCMDC2)                            | NM_1735<br>18    | 119.4  | 134.8  | 0.00946 | 1.382 |
| MCMDC<br>2  | minichromosome<br>maintenance domain<br>containing 2(MCMDC2)                            | NM_1735<br>18    | 4139.8 | 4970.2 | 0.00946 | 1.382 |
| SLC35B<br>2 | solute carrier family 35<br>member B2(SLC35B2)                                          | NM_1781<br>48    | 147.6  | 173.3  | 0.00948 | 1.163 |
| GLE1        | GLE1, RNA export<br>mediator(GLE1)                                                      | NM_0010<br>03722 | 300.9  | 399.2  | 0.00968 | 1.483 |
| PTPA        | protein phosphatase 2<br>phosphatase<br>activator(PTPA)                                 | NM_1780<br>03    | 121.1  | 148.7  | 0.00975 | 1.167 |
| RHBDL2      | rhomboid like<br>2(RHBDL2)                                                              | NM_0178<br>21    | 146.7  | 182.8  | 0.00976 | 1.263 |
| RHBDL2      | rhomboid like<br>2(RHBDL2)                                                              | NM_0178<br>21    | 518.6  | 594.4  | 0.00976 | 1.263 |
| SEH1L       | SEH1 like<br>nucleoporin(SEH1L)                                                         | NM_0010<br>13437 | 209.3  | 160.1  | 0.00976 | 0.76  |

|        |                                                    |          |        |        |         |       |  |
|--------|----------------------------------------------------|----------|--------|--------|---------|-------|--|
| SEH1L  | SEH1 like<br>nucleoporin(SEH1L)                    | NM_0010  |        |        |         |       |  |
|        |                                                    | 13437    | 273.8  | 261.4  | 0.00976 | 0.76  |  |
|        |                                                    | XR_01738 |        |        |         |       |  |
|        |                                                    | 0        | 139.3  | 114.5  | 0.00979 | 0.812 |  |
|        | eukaryotic translation<br>elongation factor 1 beta |          |        |        |         |       |  |
| EEF1B2 | 2(EEF1B2)                                          | NM_0010  |        |        |         |       |  |
|        |                                                    | 37663    | 7295.5 | 5026   | 0.0098  | 0.797 |  |
|        |                                                    | XR_03886 |        |        |         |       |  |
|        |                                                    | 7        | 179.9  | 142.7  | 0.00981 | 0.799 |  |
|        |                                                    | XM_94464 |        |        |         |       |  |
|        |                                                    | 6        | 156.4  | 177.6  | 0.01007 | 1.163 |  |
|        |                                                    | XM_00113 |        |        |         |       |  |
|        |                                                    | 2307     | 112.5  | 139.4  | 0.01019 | 1.177 |  |
| MUC4   | mucin 4, cell surface<br>associated(MUC4)          | NM_0184  |        |        |         |       |  |
|        |                                                    | 06       | 115    | 137.6  | 0.01036 | 1.137 |  |
| DDX19B | DEAD-box helicase<br>19B(DDX19B)                   | NM_0010  |        |        |         |       |  |
|        |                                                    | 14451    | 165    | 133.6  | 0.01038 | 0.799 |  |
| SP3    | Sp3 transcription<br>factor(SP3)                   | NM_0031  |        |        |         |       |  |
|        |                                                    | 11       | 131.7  | 118.4  | 0.01047 | 0.87  |  |
|        |                                                    | XR_03927 |        |        |         |       |  |
|        |                                                    | 8        | 2439.5 | 1596.3 | 0.01057 | 0.724 |  |
| FUT6   | fucosyltransferase<br>6(FUT6)                      | NM_0001  |        |        |         |       |  |
|        |                                                    | 50       | 114    | 131.2  | 0.01061 | 1.686 |  |
| FUT7   | fucosyltransferase<br>7(FUT7)                      | NM_0044  |        |        |         |       |  |
|        |                                                    | 79       | 291    | 423.6  | 0.01061 | 1.686 |  |
|        |                                                    | XM_92934 |        |        |         |       |  |
|        |                                                    | 0        | 173.3  | 128.3  | 0.01073 | 0.722 |  |
|        |                                                    | XM_92934 |        |        |         |       |  |
|        |                                                    | 0        | 4436.9 | 3161.7 | 0.01073 | 0.722 |  |
|        |                                                    | AW18389  |        |        |         |       |  |
|        |                                                    | 4        | 1115.9 | 1640.1 | 0.01111 | 1.644 |  |

|          |                                                                             |               |        |       |         |       |
|----------|-----------------------------------------------------------------------------|---------------|--------|-------|---------|-------|
| KCNC1    | potassium voltage-gated<br>channel subfamily C<br>member 1(KCNC1)           | AK125480      | 137.2  | 170.3 | 0.01117 | 1.223 |
| SPCS2    | signal peptidase<br>complex subunit<br>2(SPCS2)                             | NM_0147<br>52 | 1017.4 | 606.7 | 0.01129 | 0.642 |
|          |                                                                             | AI539492      | 211.5  | 290.5 | 0.01131 | 1.474 |
|          |                                                                             | XM_93397<br>0 | 507.4  | 329.2 | 0.01136 | 0.674 |
| NDUFAF7  | NADH:ubiquinone<br>oxidoreductase complex<br>assembly factor<br>7(NDUFAF7)  | NM_1447<br>36 | 142.2  | 129.7 | 0.01143 | 1.471 |
| NDUFAF7  | NADH:ubiquinone<br>oxidoreductase complex<br>assembly factor<br>7(NDUFAF7)  | NM_1447<br>36 | 314.6  | 418.4 | 0.01143 | 1.471 |
| RIPK4    | receptor interacting<br>serine/threonine kinase<br>4(RIPK4)                 | NM_0206<br>39 | 128.8  | 154.9 | 0.01146 | 1.162 |
| MAPK7    | mitogen-activated<br>protein kinase<br>7(MAPK7)                             | NM_1390<br>32 | 130.6  | 134.8 | 0.01154 | 0.854 |
| MAPK8IP1 | mitogen-activated<br>protein kinase 8<br>interacting protein<br>1(MAPK8IP1) | NM_0054<br>56 | 177    | 151.9 | 0.01154 | 0.854 |
| MRPL3    | mitochondrial ribosomal<br>protein L3(MRPL3)                                | NM_0072<br>08 | 124.7  | 148.7 | 0.01165 | 1.137 |



|              |                                                                     |              |        |        |         |       |
|--------------|---------------------------------------------------------------------|--------------|--------|--------|---------|-------|
|              | eukaryotic translation initiation factor 4E family member 2(EIF4E2) | NM_004846    | 1861.8 | 1286.1 | 0.01191 | 0.771 |
|              |                                                                     | XM_001715717 | 160.7  | 131.4  | 0.01204 | 0.809 |
|              |                                                                     | XM_001715717 | 415.3  | 342.5  | 0.01204 | 0.809 |
| BBS1         | Bardet-Biedl syndrome 1(BBS1)                                       | NM_024649    | 179.1  | 201.5  | 0.01237 | 1.141 |
|              |                                                                     | CR605357     | 133    | 158.6  | 0.01242 | 1.17  |
| CYP4A11      | cytochrome P450 family 4 subfamily A member 11(CYP4A11)             | NM_000778    | 146.1  | 134.9  | 0.01252 | 0.905 |
| LOC105378397 | uncharacterized LOC105378397(LOC105378397)                          | BX092644     | 178.7  | 230.7  | 0.01256 | 1.343 |
|              |                                                                     | NM_003858    | 122.3  | 109.6  | 0.01258 | 0.865 |
| CCNK         | cyclin K(CCNK)                                                      | NM_024056    | 527.8  | 681.4  | 0.01262 | 1.508 |
| TMEM106C     | transmembrane protein 106C(TMEM106C)                                | NM_181716    | 208.1  | 258.5  | 0.01267 | 1.313 |
| cenpv        | centromere protein V(CENPV)                                         | NM_144998    | 416.2  | 502.5  | 0.01267 | 1.313 |
| CENPX        | centromere protein X(CENPX)                                         | NM_022483    | 2771.5 | 4189.6 | 0.01278 | 1.703 |
| TMEM267      | transmembrane protein 267(TMEM267)                                  | NM_000972    | 320.5  | 241.5  | 0.01279 | 0.759 |
| RPL7A        | ribosomal protein L7a(RPL7A)                                        |              |        |        |         |       |

|         |                                                                        |                  |        |        |         |       |
|---------|------------------------------------------------------------------------|------------------|--------|--------|---------|-------|
|         |                                                                        | XR_03691<br>9    | 4757.2 | 2981.9 | 0.01296 | 0.746 |
| EEPD1   | endonuclease/exonuclease/phosphatase family domain containing 1(EEPD1) | NM_0306<br>36    | 295.4  | 224.9  | 0.01307 | 0.778 |
| MAR5    | membrane associated ring-CH-type finger 5(MARCH5)                      | NM_0178<br>24    | 101.3  | 113.9  | 0.01308 | 1.137 |
| MAR6    | membrane associated ring-CH-type finger 6(MARCH6)                      | NM_0058<br>85    | 103.4  | 125.5  | 0.01308 | 1.137 |
|         |                                                                        | XR_03943<br>9    | 155.4  | 129.1  | 0.0132  | 0.495 |
|         |                                                                        | XR_03943<br>9    | 1435   | 675.3  | 0.0132  | 0.495 |
|         |                                                                        | XR_01683<br>2    | 224.8  | 168.2  | 0.01326 | 0.752 |
|         |                                                                        | XR_03810<br>1    | 843.9  | 504.2  | 0.01336 | 0.628 |
| EPB41L5 | erythrocyte membrane protein band 4.1 like 5(EPB41L5)                  | NM_0209<br>09    | 1038.6 | 725.5  | 0.01341 | 0.752 |
|         |                                                                        | XR_03843<br>3    | 297.4  | 177.6  | 0.01345 | 0.569 |
|         |                                                                        | XR_03843<br>3    | 2121.1 | 1243.5 | 0.01345 | 0.569 |
| MPZL1   | myelin protein zero like 1(MPZL1)                                      | NM_0245<br>69    | 121.6  | 102    | 0.01348 | 0.812 |
|         |                                                                        | XM_00113<br>1877 | 117.6  | 139.7  | 0.0135  | 1.136 |

|         |                                             |              |        |        |         |       |              |      |        |
|---------|---------------------------------------------|--------------|--------|--------|---------|-------|--------------|------|--------|
| RUSC1   | RUN and SH3 domain containing 1(RUSC1)      | NM_014328    | 662.7  | 832.5  | 0.01363 | 1.51  |              |      |        |
| THBS3   | thrombospondin 3(THBS3)                     | NM_007112    | 300.1  | 347.7  | 0.01364 | 1.277 |              |      |        |
|         |                                             | NM_001039755 | 5325.7 | 6709   | 0.0137  | 1.431 |              |      |        |
| HBP1    | HMG-box transcription factor 1(HBP1)        | NM_012257    | 180.7  | 166.6  | 0.01374 | 0.744 |              |      |        |
| HBQ1    | hemoglobin subunit theta 1(HBQ1)            | NM_005331    | 337    | 242.9  | 0.01374 | 0.744 |              |      |        |
| RPL19P9 | ribosomal protein L19 pseudogene 9(RPL19P9) | NM_001080544 | 660.6  | 436.1  | 0.01375 | 0.724 |              |      |        |
| RPL19P9 | ribosomal protein L19 pseudogene 9(RPL19P9) | NM_001080544 | 6597.3 | 4381.6 | 0.01375 | 0.724 |              |      |        |
|         |                                             | XR_038693    | 1302   | 690.7  | 0.01381 | 0.563 |              |      |        |
|         |                                             | XR_038693    | 1767.9 | 1231.7 | 0.01381 | 0.563 |              |      |        |
|         |                                             | XM_001723164 | 151.5  | 167.3  | 0.01411 | 1.098 |              |      |        |
|         |                                             | XR_037282    | 263.9  | 176.4  | 0.01417 | 0.673 | NM_001107943 | 0.63 | 112.77 |
| MAFF    | MAF bZIP transcription factor F(MAFF)       | NM_012323    | 146.7  | 136.4  | 0.01423 | 1.957 |              |      |        |
| MAFG    | MAF bZIP transcription factor G(MAFG)       | NM_002359    | 487.8  | 800.6  | 0.01423 | 1.957 |              |      |        |
|         |                                             | XM_001133677 | 106.4  | 116.7  | 0.01429 | 0.882 |              |      |        |

|          |                                                             |              |        |        |         |       |           |       |      |
|----------|-------------------------------------------------------------|--------------|--------|--------|---------|-------|-----------|-------|------|
|          |                                                             | XM_001133677 | 138.9  | 123.4  | 0.01429 | 0.882 |           |       |      |
| MAP2K7   | mitogen-activated protein kinase kinase 7(MAP2K7)           | NM_145185    | 127.2  | 113.2  | 0.0143  | 0.864 |           |       |      |
| PIPSL    | PIP5K1A and PSMD4-like, pseudogene(PIPSL)                   | NR_002319    | 223.4  | 172.6  | 0.01452 | 0.774 |           |       |      |
| ARL17B   | ADP ribosylation factor like GTPase 17B(ARL17B)             | NM_001039083 | 4156   | 5459.5 | 0.01458 | 1.473 |           |       |      |
|          |                                                             | XM_937758    | 805.8  | 480    | 0.01463 | 0.638 |           |       |      |
| c21orf59 | chromosome 21 open reading frame 59(C21orf59)               | NM_021254    | 1267.9 | 1675.6 | 0.01472 | 1.473 |           |       |      |
| PI4KA    | phosphatidylinositol 4-kinase alpha(PI4KA)                  | NM_002650    | 252.8  | 190.5  | 0.01475 | 0.761 |           |       |      |
| ZNF280D  | zinc finger protein 280D(ZNF280D)                           | NM_001002844 | 113.1  | 106.4  | 0.0148  | 0.885 |           |       |      |
|          |                                                             | XM_929608    | 100    | 124.1  | 0.01487 | 1.172 |           |       |      |
| GPRC5A   | G protein-coupled receptor class C group 5 member A(GPRC5A) | NM_003979    | 118.4  | 137.2  | 0.01491 | 1.115 |           |       |      |
|          |                                                             | XR_017653    | 2142.3 | 1463.8 | 0.01502 | 0.77  | NM_134372 | 22.51 | 0.03 |
|          |                                                             | XM_927468    | 125.8  | 115.6  | 0.01503 | 0.884 |           |       |      |
| TRNT1    | tRNA nucleotidyl transferase 1(TRNT1)                       | NM_182916    | 117.5  | 105.4  | 0.01514 | 0.851 |           |       |      |

|             |                                                     |                  |        |        |         |       |
|-------------|-----------------------------------------------------|------------------|--------|--------|---------|-------|
| TRNT1       | tRNA nucleotidyl transferase 1(TRNT1)               | NM_1829<br>16    | 126.2  | 120.2  | 0.01514 | 0.851 |
|             |                                                     | XM_00171<br>9035 | 522.4  | 338.7  | 0.01515 | 0.674 |
| ZDHC2<br>4  | zinc finger DHHC-type containing 24(ZDHC24)         | NM_2073<br>40    | 262.6  | 290.4  | 0.01519 | 1.181 |
| EWSR1       | EWS RNA binding protein 1(EWSR1)                    | NM_0052<br>43    | 222.5  | 298.9  | 0.01527 | 1.489 |
| MROH7       | maestro heat like repeat family member 7(MROH7)     | NM_0010<br>39464 | 215.5  | 355.7  | 0.01531 | 1.862 |
| PLCD4       | phospholipase C delta 4(PLCD4)                      | NM_0327<br>26    | 179.8  | 254.8  | 0.01535 | 1.534 |
| FAM63A      | family with sequence similarity 63 member A(FAM63A) | NM_0183<br>79    | 124.1  | 148.6  | 0.01536 | 1.429 |
| FAM63B      | family with sequence similarity 63 member B(FAM63B) | NM_0010<br>40450 | 626.5  | 784.2  | 0.01536 | 1.429 |
|             |                                                     | XR_01687<br>2    | 308.9  | 200.2  | 0.01544 | 0.646 |
| SLC35E<br>1 | solute carrier family 35 member E1(SLC35E1)         | NM_0248<br>81    | 121.9  | 121.4  | 0.01558 | 1.543 |
| SLC35E<br>1 | solute carrier family 35 member E1(SLC35E1)         | NM_0248<br>81    | 1336.2 | 1830.8 | 0.01558 | 1.543 |
|             |                                                     | XM_92769<br>3    | 142    | 164.3  | 0.01559 | 1.148 |
|             |                                                     | XM_00172<br>1625 | 2052.7 | 2763.4 | 0.0156  | 1.474 |

|          |                                                  |           |         |        |         |       |              |      |       |
|----------|--------------------------------------------------|-----------|---------|--------|---------|-------|--------------|------|-------|
|          | chromosome 1 open                                |           |         |        |         |       |              |      |       |
| C1orf229 | reading frame 229(C1orf229)                      | NM_207401 | 162     | 144.4  | 0.01563 | 0.886 |              |      |       |
| ZNF394   | zinc finger protein 394(ZNF394)                  | NM_032164 | 1925.2  | 2622.5 | 0.01565 | 1.525 |              |      |       |
|          |                                                  | AW450365  | 123.5   | 150.2  | 0.01567 | 1.174 |              |      |       |
|          |                                                  | AA503583  | 153     | 130    | 0.01584 | 0.811 |              |      |       |
| ACTB     | actin beta(ACTB)                                 | NM_001101 | 2599.1  | 1663.7 | 0.01594 | 0.593 |              |      |       |
| ACTB     | actin beta(ACTB)                                 | NM_001101 | 7876.7  | 3772.5 | 0.01594 | 0.593 |              |      |       |
| ACTB     | actin beta(ACTB)                                 | NM_001101 | 13400.8 | 8681.3 | 0.01594 | 0.593 |              |      |       |
| RAMP2    | receptor activity modifying protein 2(RAMP2)     | NM_005854 | 144.1   | 167.6  | 0.01602 | 1.146 | NM_001031645 | 1.93 | 10.04 |
| RAMP2    | receptor activity modifying protein 2(RAMP2)     | NM_005854 | 159.1   | 173.6  | 0.01602 | 1.146 |              |      |       |
|          |                                                  | XM_945223 | 123.9   | 144.5  | 0.01603 | 1.124 |              |      |       |
|          |                                                  | XM_934920 | 250.7   | 170.2  | 0.01607 | 0.703 |              |      |       |
| ZBTB41   | zinc finger and BTB domain containing 41(ZBTB41) | NM_194314 | 132.7   | 112.5  | 0.0162  | 0.831 |              |      |       |
|          |                                                  | XR_037881 | 117.9   | 122.3  | 0.01671 | 0.605 |              |      |       |
|          |                                                  | XR_037881 | 1416.1  | 810.5  | 0.01671 | 0.605 |              |      |       |

|        |                                                                        |                  |        |        |         |       |               |       |      |
|--------|------------------------------------------------------------------------|------------------|--------|--------|---------|-------|---------------|-------|------|
|        |                                                                        | XM_94317         |        |        |         |       |               |       |      |
|        |                                                                        | 4                | 115.6  | 147.2  | 0.01677 | 1.249 |               |       |      |
| SLC26A | solute carrier family 26                                               | NM_1334          |        |        |         |       |               |       |      |
| 10     | member 10(SLC26A10)                                                    | 89               | 99.9   | 105.7  | 0.01684 | 0.882 |               |       |      |
| SLC26A | solute carrier family 26                                               | NM_1334          |        |        |         |       |               |       |      |
| 10     | member 10(SLC26A10)                                                    | 89               | 144.5  | 130.6  | 0.01684 | 0.882 |               |       |      |
| POTEKP | POTE ankyrin domain<br>family member K,<br>pseudogene(POTEKP)          | NM_0010<br>17421 | 5570.2 | 2215.8 | 0.01696 | 0.53  |               |       |      |
| ENTPD1 | ectonucleoside<br>triphosphate<br>diphosphohydrolase<br>1(ENTPD1)      | NM_0010<br>98175 | 276.2  | 200.2  | 0.01706 | 0.738 |               |       |      |
|        |                                                                        | XM_94449         |        |        |         |       |               |       |      |
|        |                                                                        | 9                | 117.6  | 112.3  | 0.01711 | 0.92  |               |       |      |
| PIGL   | phosphatidylinositol<br>glycan anchor<br>biosynthesis class<br>L(PIGL) | NM_0042<br>78    | 128.1  | 120.8  | 0.01714 | 0.905 |               |       |      |
|        |                                                                        | XM_00112         |        |        |         |       |               |       |      |
|        |                                                                        | 9013             | 153.4  | 158.6  | 0.01715 | 1.741 |               |       |      |
|        |                                                                        | XM_00112         |        |        |         |       |               |       |      |
|        |                                                                        | 9013             | 355.1  | 527.1  | 0.01715 | 1.741 | NM_144<br>748 | 66.99 | 0.14 |
| CDK2AP | cyclin dependent kinase<br>2 associated protein<br>2(CDK2AP2)          | NM_0058<br>51    | 166.6  | 209.5  | 0.01716 | 1.28  |               |       |      |
|        |                                                                        | XR_01529         |        |        |         |       |               |       |      |
|        |                                                                        | 5                | 5069.4 | 3031.1 | 0.01726 | 0.674 |               |       |      |
| STK11  | serine/threonine kinase<br>11(STK11)                                   | NM_0004<br>55    | 176.8  | 145.8  | 0.0173  | 0.824 |               |       |      |

|        |                                                          |                  |        |       |         |       |                  |       |      |
|--------|----------------------------------------------------------|------------------|--------|-------|---------|-------|------------------|-------|------|
| EID2B  | EP300 interacting inhibitor of differentiation 2B(EID2B) | NM_1523<br>61    | 122.4  | 120.3 | 0.01733 | 1.477 |                  |       |      |
| EIF1   | eukaryotic translation initiation factor 1(EIF1)         | NM_0058<br>01    | 4551.9 | 6130  | 0.01733 | 1.477 |                  |       |      |
|        |                                                          | XM_00172<br>0210 | 238    | 184.3 | 0.01735 | 0.765 |                  |       |      |
| MUC6   | mucin 6, oligomeric mucus/gel-forming(MUC6)              | NM_0059<br>61    | 129.1  | 126.6 | 0.01737 | 1.502 |                  |       |      |
| MUC6   | mucin 6, oligomeric mucus/gel-forming(MUC6)              | NM_0059<br>61    | 223.8  | 209.8 | 0.01737 | 1.502 |                  |       |      |
| MUC6   | mucin 6, oligomeric mucus/gel-forming(MUC6)              | NM_0059<br>61    | 307.2  | 393.2 | 0.01737 | 1.502 | NM_001<br>107793 | 77.29 | 6.85 |
| ARF1   | ADP ribosylation factor 1(ARF1)                          | NM_0010<br>24228 | 433.4  | 313.9 | 0.01755 | 0.758 | NM_001<br>107793 | 77.29 | 6.85 |
|        |                                                          | XR_01602<br>7    | 194.3  | 150.1 | 0.01759 | 0.784 | NM_001<br>107793 | 77.29 | 6.85 |
| ARSB   | arylsulfatase B(ARSB)                                    | NM_0000<br>46    | 149.2  | 133.2 | 0.01764 | 0.874 | NM_001<br>107793 | 77.29 | 6.85 |
| KANK4  | KN motif and ankyrin repeat domains 4(KANK4)             | NM_1817<br>12    | 105.4  | 142.7 | 0.01773 | 1.263 |                  |       |      |
| KANSL1 | KAT8 regulatory NSL complex subunit 1(KANSL1)            | NM_0154<br>43    | 133.3  | 160.8 | 0.01773 | 1.263 |                  |       |      |



|         |                                                     |          |        |        |         |       |
|---------|-----------------------------------------------------|----------|--------|--------|---------|-------|
|         |                                                     | XM_00171 |        |        |         |       |
|         |                                                     | 9452     | 120.8  | 136.8  | 0.01779 | 1.097 |
| STXBP2  | syntaxin binding protein 2(STXBP2)                  | NM_0069  |        |        |         |       |
|         |                                                     | 49       | 294.2  | 347.2  | 0.01821 | 1.293 |
|         |                                                     | XR_01893 |        |        |         |       |
|         |                                                     | 7        | 392.6  | 238.8  | 0.01828 | 0.616 |
|         |                                                     | XR_01893 |        |        |         |       |
|         |                                                     | 7        | 4367.6 | 3029.7 | 0.01828 | 0.616 |
| TRIM13  | tripartite motif containing 13(TRIM13)              | NM_0010  |        |        |         |       |
|         |                                                     | 07278    | 126.8  | 127    | 0.01839 | 1.482 |
| TRIM13  | tripartite motif containing 13(TRIM13)              | NM_0010  |        |        |         |       |
|         |                                                     | 07278    | 875.2  | 1150.2 | 0.01839 | 1.482 |
| GNG8    | G protein subunit gamma 8(GNG8)                     | NM_0332  |        |        |         |       |
|         |                                                     | 58       | 211.1  | 169.3  | 0.01839 | 0.797 |
| CTDSPL2 | CTD small phosphatase like 2(CTDSPL2)               | NM_0163  |        |        |         |       |
|         |                                                     | 96       | 1542.2 | 1003.5 | 0.01871 | 0.705 |
| CNGA1   | cyclic nucleotide gated channel alpha 1(CNGA1)      | NM_0000  |        |        |         |       |
|         |                                                     | 87       | 147.8  | 133.6  | 0.0188  | 0.869 |
|         |                                                     | XM_00171 |        |        |         |       |
|         |                                                     | 4161     | 171.2  | 192    | 0.01885 | 1.165 |
| C4BPA   | complement component 4 binding protein alpha(C4BPA) | NM_0007  |        |        |         |       |
|         |                                                     | 15       | 168.7  | 148.8  | 0.01889 | 0.876 |
|         |                                                     | XR_01942 |        |        |         |       |
|         |                                                     | 9        | 241.6  | 156.9  | 0.01905 | 0.638 |
| LGALS7B | galectin 7B(LGALS7B)                                | NM_0010  |        |        |         |       |
|         |                                                     | 42507    | 369    | 836.2  | 0.01938 | 2.701 |
| LGALS8  | galectin 8(LGALS8)                                  | NM_2015  |        |        |         |       |
|         |                                                     | 45       | 983    | 2633.4 | 0.01944 | 2.899 |

|        |                       |          |       |        |         |       |  |
|--------|-----------------------|----------|-------|--------|---------|-------|--|
| LGALS7 |                       | NM_0010  |       |        |         |       |  |
| B      | galectin 7B(LGALS7B)  | 42507    | 628   | 1540.9 | 0.01944 | 2.899 |  |
|        | mex-3 RNA binding     |          |       |        |         |       |  |
|        | family member         | NM_0166  |       |        |         |       |  |
| MEX3C  | C(MEX3C)              | 26       | 285.5 | 194.9  | 0.01952 | 0.694 |  |
|        |                       | XM_00112 |       |        |         |       |  |
|        |                       | 5808     | 172.8 | 141.4  | 0.01957 | 0.808 |  |
|        |                       | NM_0095  |       |        |         |       |  |
| Igals9 | galectin 9(LGALS9)    | 87       | 983   | 2633.4 | 0.0196  | 3.156 |  |
|        | proteasome subunit    | NM_1521  |       |        |         |       |  |
| PSMA3  | alpha 3(PSMA3)        | 32       | 701.3 | 478.1  | 0.0198  | 0.733 |  |
|        |                       | XR_03910 |       |        |         |       |  |
|        |                       | 8        | 184.3 | 148.2  | 0.01993 | 0.793 |  |
|        | prostaglandin E       | NM_0066  |       |        |         |       |  |
| PTGES3 | synthase 3(PTGES3)    | 01       | 302.1 | 211.8  | 0.01998 | 0.711 |  |
|        |                       | XR_01871 |       |        |         |       |  |
|        |                       | 0        | 109.6 | 127.1  | 0.02019 | 1.107 |  |
|        | breast cancer         |          |       |        |         |       |  |
|        | metastasis suppressor | NM_0010  |       |        |         |       |  |
| brms1  | 1(BRMS1)              | 24958    | 543.3 | 399.1  | 0.02022 | 0.855 |  |
|        | heat shock protein 90 |          |       |        |         |       |  |
| HSP90A | alpha family class A  | NM_0010  |       |        |         |       |  |
| A1     | member 1(HSP90AA1)    | 17963    | 150.3 | 136.6  | 0.02028 | 0.889 |  |
|        | heat shock protein 90 |          |       |        |         |       |  |
| HSP90A | alpha family class A  | NM_0053  |       |        |         |       |  |
| A1     | member 1(HSP90AA1)    | 48       | 170   | 159.3  | 0.02028 | 0.889 |  |
|        | coronin 1A            |          |       |        |         |       |  |
| LOC606 | pseudogene(LOC60672   | NR_00245 |       |        |         |       |  |
| 724    | 4)                    | 4        | 3790  | 5486.9 | 0.02035 | 1.588 |  |

|             |                                                                                                 |                  |        |        |         |       |                  |               |
|-------------|-------------------------------------------------------------------------------------------------|------------------|--------|--------|---------|-------|------------------|---------------|
| FAM98B      | family with sequence<br>similarity 98 member<br>B(FAM98B)                                       | NM_0010<br>42429 | 361.1  | 418.5  | 0.02036 | 1.25  |                  |               |
| YWHAH       | tyrosine 3-<br>monooxygenase/tryptop<br>han 5-monooxygenase<br>activation protein<br>eta(YWHAH) | NM_0034<br>05    | 3061.8 | 1821.7 | 0.02037 | 0.668 |                  |               |
| GPSM2       | G-protein signaling<br>modulator 2(GPSM2)                                                       | NM_0132<br>96    | 117    | 134    | 0.02039 | 1.106 |                  |               |
| MIR1247     | microRNA<br>1247(MIR1247)                                                                       | NR_03164<br>9    | 125.6  | 119.4  | 0.02039 | 0.905 |                  |               |
| SET         | SET nuclear proto-<br>oncogene(SET)                                                             | NM_0030<br>11    | 358.1  | 275.1  | 0.02042 | 0.764 |                  |               |
| DDX54       | DEAD-box helicase<br>54(DDX54)                                                                  | NM_0240<br>72    | 4076.4 | 5394.3 | 0.02043 | 1.487 |                  |               |
|             |                                                                                                 | BX098521         | 151.7  | 199.5  | 0.02044 | 1.297 |                  |               |
|             |                                                                                                 | XR_00141<br>6    | 248    | 338.7  | 0.02063 | 1.621 | NM_001<br>009603 | 28.32<br>0.90 |
|             |                                                                                                 | XR_01870<br>5    | 230.8  | 157.9  | 0.02067 | 0.677 |                  |               |
| CCDC22      | coiled-coil domain<br>containing 22(CCDC22)                                                     | NM_0140<br>08    | 155.8  | 194.2  | 0.02068 | 1.29  |                  |               |
| DCUN1<br>D1 | defective in cullin<br>neddylation 1 domain<br>containing 1(DCUN1D1)                            | NM_0206<br>40    | 264.6  | 193.2  | 0.02078 | 0.784 |                  |               |

|                  |                                                                                           |                     |        |        |         |       |
|------------------|-------------------------------------------------------------------------------------------|---------------------|--------|--------|---------|-------|
| DCTPP1           | dCTP pyrophosphatase<br>1(DCTPP1)                                                         | NM_0240<br>96       | 226.5  | 177.5  | 0.02078 | 0.784 |
| RBBP5            | RB binding protein 5,<br>histone lysine<br>methyltransferase<br>complex<br>subunit(RBBP5) | NM_0050<br>57       | 134.7  | 127.2  | 0.02091 | 0.916 |
| YY1              | YY1 transcription<br>factor(YY1)                                                          | NM_0034<br>03       | 457.6  | 317.6  | 0.02093 | 0.721 |
| YY1              | YY1 transcription<br>factor(YY1)                                                          | NM_0034<br>03       | 994.4  | 742.5  | 0.02093 | 0.721 |
| DPM1             | dolichyl-phosphate<br>mannosyltransferase<br>subunit 1,<br>catalytic(DPM1)                | NM_0038<br>59       | 233.9  | 190.1  | 0.02098 | 0.825 |
| DPM2             | dolichyl-phosphate<br>mannosyltransferase<br>subunit 2,<br>regulatory(DPM2)               | NM_0038<br>63       | 509.3  | 490    | 0.02098 | 0.825 |
| LOC101<br>930164 | uncharacterized<br>LOC101930164(LOC10<br>1930164)                                         | AK026751<br>NM_0174 | 177.1  | 211.8  | 0.02102 | 1.241 |
| MYO3A            | myosin IIIA(MYO3A)                                                                        | 33                  | 133.9  | 124.2  | 0.02103 | 0.897 |
| PRRG4            | proline rich and Gla<br>domain 4(PRRG4)                                                   | NM_0240<br>81       | 188.1  | 246.5  | 0.02121 | 1.372 |
|                  |                                                                                           | XR_01826<br>1       | 1141.9 | 606.6  | 0.02123 | 0.603 |
| NSA2             | NSA2, ribosome<br>biogenesis<br>homolog(NSA2)                                             | NM_0148<br>86       | 1514.3 | 1136.2 | 0.02126 | 0.779 |

|        |                                                 |              |         |        |         |       |
|--------|-------------------------------------------------|--------------|---------|--------|---------|-------|
| NSA2   | NSA2, ribosome biogenesis homolog(NSA2)         | NM_014886    | 2216.3  | 1551.3 | 0.02126 | 0.779 |
| ZC3H3  | zinc finger CCCH-type containing 3(ZC3H3)       | NM_015117    | 242.7   | 194.5  | 0.02133 | 0.819 |
|        |                                                 | XM_001721430 | 3671.5  | 5101.1 | 0.02148 | 1.503 |
| ACVR1  | activin A receptor type 1(ACVR1)                | NM_001105    | 220.5   | 273.4  | 0.02162 | 1.345 |
| APH1A  | aph-1 homolog A, gamma-secretase subunit(APH1A) | NM_001077628 | 841.1   | 566.5  | 0.02167 | 0.724 |
|        |                                                 | XR_019029    | 175.5   | 155.1  | 0.02168 | 0.88  |
| ACTB   | actin beta(ACTB)                                | NM_001101    | 2599.1  | 1663.7 | 0.0217  | 0.69  |
| ACTB   | actin beta(ACTB)                                | NM_001101    | 7876.7  | 3772.5 | 0.0217  | 0.69  |
| ACTG1  | actin gamma 1(ACTG1)                            | NM_001614    | 13400.8 | 8681.3 | 0.0217  | 0.69  |
|        |                                                 | XR_040489    | 125.3   | 143.6  | 0.02172 | 1.111 |
| ZNF468 | zinc finger protein 468(ZNF468)                 | NM_199132    | 134.6   | 147.4  | 0.02187 | 1.195 |
| ZNF468 | zinc finger protein 468(ZNF468)                 | NM_199132    | 143     | 171.6  | 0.02187 | 1.195 |
| BNIP3L | BCL2 interacting protein 3 like(BNIP3L)         | NM_004331    | 106.5   | 128.3  | 0.02193 | 1.146 |
| BNIP1L | BCL2 interacting protein like(BNIP1L)           | NM_138278    | 136     | 155.3  | 0.02193 | 1.146 |

|              |                                                                 |                  |        |        |         |       |
|--------------|-----------------------------------------------------------------|------------------|--------|--------|---------|-------|
| FLYWC<br>H1  | FLYWCH-type zinc<br>finger 1(FLYWCH1)                           | NM_0209<br>12    | 146.8  | 133.3  | 0.02202 | 0.884 |
|              |                                                                 | XM_93898<br>8    | 1597.3 | 550.1  | 0.02221 | 0.409 |
| POLRMT       | RNA polymerase<br>mitochondrial(POLRMT)                         | NM_0050<br>35    | 252.8  | 290.7  | 0.02229 | 1.226 |
| ETS1         | ETS proto-oncogene 1,<br>transcription<br>factor(ETS1)          | NM_0052<br>38    | 211    | 290.5  | 0.02231 | 1.423 |
| FASTK        | Fas activated<br>serine/threonine<br>kinase(FASTK)              | NM_0067<br>12    | 116.3  | 97     | 0.02255 | 0.796 |
| KLF10        | Kruppel like factor<br>10(KLF10)                                | NM_0056<br>55    | 104.3  | 127.1  | 0.02262 | 1.16  |
|              |                                                                 | XM_94424<br>6    | 587.6  | 345    | 0.0227  | 0.62  |
| CEP192       | centrosomal protein<br>192(CEP192)                              | NM_0321<br>42    | 2713.1 | 3587.6 | 0.02299 | 1.456 |
| ART4         | ADP-ribosyltransferase<br>4 (Dombrock blood<br>group)(ART4)     | NM_0210<br>71    | 106.9  | 131.7  | 0.02317 | 1.146 |
| DYNC1L<br>I2 | dynein cytoplasmic 1<br>light intermediate chain<br>2(DYNC1LI2) | NM_0061<br>41    | 132.2  | 123.3  | 0.02332 | 0.897 |
|              |                                                                 | XR_01956<br>5    | 2110.2 | 1326.2 | 0.02336 | 0.704 |
|              |                                                                 | XR_01956<br>5    | 3209.1 | 2022.7 | 0.02336 | 0.704 |
| DIXDC1       | DIX domain containing<br>1(DIXDC1)                              | NM_0010<br>37954 | 135.7  | 150    | 0.02338 | 1.077 |

|        |                       |          |         |         |         |       |
|--------|-----------------------|----------|---------|---------|---------|-------|
|        |                       | CD237661 | 289.1   | 400.2   | 0.02363 | 1.601 |
|        | ribosomal protein     | NM_0029  |         |         |         |       |
| RPS27A | S27a(RPS27A)          | 54       | 3219    | 2388.2  | 0.02372 | 0.809 |
|        | ribosomal protein     | NM_0029  |         |         |         |       |
| RPS27A | S27a(RPS27A)          | 54       | 17436.1 | 14379.2 | 0.02372 | 0.809 |
|        |                       | BF054947 | 125.4   | 141.5   | 0.02391 | 1.09  |
|        |                       | XR_01638 |         |         |         |       |
|        |                       | 5        | 386.7   | 274.5   | 0.02404 | 0.74  |
|        |                       | XM_37231 |         |         |         |       |
|        |                       | 9        | 138.5   | 160.9   | 0.02422 | 1.165 |
|        |                       | XR_04229 |         |         |         |       |
|        |                       | 5        | 210.8   | 303.1   | 0.02437 | 1.58  |
|        | ribosomal protein     | NM_0010  |         |         |         |       |
| RPL6   | L6(RPL6)              | 24662    | 165.1   | 148.9   | 0.0244  | 0.726 |
|        | ribosomal protein     | NM_0010  |         |         |         |       |
| RPL6   | L6(RPL6)              | 24662    | 2434.3  | 1880.7  | 0.0244  | 0.726 |
|        | ribosomal protein     | NM_0010  |         |         |         |       |
| RPL6   | L6(RPL6)              | 24662    | 5324.9  | 3122.2  | 0.0244  | 0.726 |
|        | transforming growth   |          |         |         |         |       |
|        | factor beta regulator | NM_0047  |         |         |         |       |
| TBRG4  | 4(TBRG4)              | 49       | 159.3   | 143.5   | 0.02451 | 0.886 |
|        |                       | XR_03967 |         |         |         |       |
|        |                       | 8        | 173.8   | 147.4   | 0.02457 | 0.85  |
|        | zinc finger RANBP2-   |          |         |         |         |       |
|        | type containing       | NM_0175  |         |         |         |       |
| ZRANB1 | 1(ZRANB1)             | 80       | 154.2   | 175.2   | 0.02463 | 1.153 |
|        | abhydrolase domain    |          |         |         |         |       |
| ABHD17 | containing            | NM_0160  |         |         |         |       |
| B      | 17B(ABHD17B)          | 14       | 114.5   | 126.7   | 0.02471 | 0.817 |

|               |                                                                        |                                   |                 |                |                    |                |
|---------------|------------------------------------------------------------------------|-----------------------------------|-----------------|----------------|--------------------|----------------|
| ABHD17<br>C   | abhydrolase domain<br>containing<br>17C(ABHD17C)                       | NM_0212<br>14<br>XM_00172<br>3141 | 154.7<br>1229.6 | 129.6<br>827.3 | 0.02471<br>0.02472 | 0.817<br>0.736 |
| CCT8L1<br>P   | chaperonin containing<br>TCP1 subunit 8 like 1,<br>pseudogene(CCT8L1P) | NM_0010<br>29866<br>XR_03898<br>4 | 447.8<br>981.9  | 297.4<br>612.8 | 0.0249<br>0.02492  | 0.668<br>0.669 |
| BTG2          | BTG anti-proliferation<br>factor 2(BTG2)                               | NM_0067<br>63                     | 282.1           | 226.1          | 0.02504            | 0.813          |
| HNMT          | histamine N-<br>methyltransferase(HNM<br>T)                            | NM_0068<br>95                     | 108.5           | 130.5          | 0.02506            | 1.127          |
| HNRNP<br>A1   | heterogeneous nuclear<br>ribonucleoprotein<br>A1(HNRNPA1)              | NM_0311<br>57<br>AW27647<br>9     | 113.3<br>1131.4 | 119.9<br>1642  | 0.02506<br>0.02509 | 1.127<br>1.62  |
| GSKIP         | GSK3B interacting<br>protein(GSKIP)                                    | NM_0164<br>72                     | 98.9            | 124.5          | 0.02511            | 1.164          |
| PXMP4         | peroxisomal membrane<br>protein 4(PXMP4)                               | NM_1833<br>97                     | 150.9           | 177.8          | 0.02518            | 1.171          |
| SHROOM4<br>M4 | shroom family member<br>4(SHROOM4)                                     | NM_0207<br>17                     | 135.1           | 165.1          | 0.0252             | 1.633          |
| SHROOM4<br>M4 | shroom family member<br>4(SHROOM4)                                     | NM_0207<br>17                     | 729             | 1031.1         | 0.0252             | 1.633          |
| ENO1          | enolase 1(ENO1)                                                        | NM_0014<br>28                     | 159.2           | 193.5          | 0.02526            | 1.233          |



|              |                                                                                  |                  |        |       |         |       |
|--------------|----------------------------------------------------------------------------------|------------------|--------|-------|---------|-------|
| SEC22C       | SEC22 homolog C,<br>vesicle trafficking<br>protein(SEC22C)                       | NM_0329<br>70    | 124.4  | 114.1 | 0.02528 | 0.884 |
| SEC22C       | SEC22 homolog C,<br>vesicle trafficking<br>protein(SEC22C)                       | NM_0329<br>70    | 130.9  | 135.7 | 0.02528 | 0.884 |
| EFCAB5       | EF-hand calcium<br>binding domain<br>5(EFCAB5)                                   | NM_0010<br>33562 | 335.3  | 263   | 0.02532 | 0.811 |
| EIF4E3       | eukaryotic translation<br>initiation factor 4E family<br>member 3(EIF4E3)        | NM_1733<br>59    | 207.5  | 174.1 | 0.02538 | 1.41  |
| EIF4EBP<br>2 | eukaryotic translation<br>initiation factor 4E<br>binding protein<br>2(EIF4EBP2) | NM_0040<br>96    | 232.9  | 286.3 | 0.02538 | 1.41  |
| CSNK2A<br>1  | casein kinase 2 alpha<br>1(CSNK2A1)                                              | NM_0018<br>95    | 190.8  | 163.3 | 0.02543 | 0.856 |
|              |                                                                                  | XR_01756<br>5    | 605.1  | 385.7 | 0.02553 | 0.652 |
|              |                                                                                  | XR_03885<br>1    | 505.1  | 672.8 | 0.02554 | 1.552 |
| TDRD1        | tudor domain containing<br>1(TDRD1)                                              | NM_1987<br>95    | 273.5  | 350.9 | 0.02562 | 1.341 |
| TDRD1        | tudor domain containing<br>1(TDRD1)                                              | NM_1987<br>95    | 346    | 425.7 | 0.02562 | 1.341 |
|              |                                                                                  | XR_03914<br>6    | 344.3  | 230.4 | 0.02562 | 0.673 |
|              |                                                                                  | XM_29208<br>5    | 1828.7 | 890.3 | 0.02569 | 0.531 |

|              |                                                                 |               |        |        |         |       |               |      |       |
|--------------|-----------------------------------------------------------------|---------------|--------|--------|---------|-------|---------------|------|-------|
| SSPO         | SCO-spondin(SSPO)                                               | NM_1984<br>55 | 119.1  | 153.3  | 0.02596 | 1.222 |               |      |       |
|              | ATPase H+ transporting                                          |               |        |        |         |       |               |      |       |
| ATP6V0<br>E1 | V0 subunit<br>e1(ATP6V0E1)                                      | NM_0039<br>45 | 338.6  | 416.2  | 0.02619 | 1.308 |               |      |       |
|              |                                                                 | W91949        | 129.6  | 107.7  | 0.02624 | 0.791 |               |      |       |
|              | glycerophosphodiester<br>phosphodiesterase<br>domain containing |               |        |        |         |       |               |      |       |
| GDPD3        | 3(GDPD3)                                                        | NM_0243<br>07 | 340.3  | 412.8  | 0.02631 | 1.35  |               |      |       |
|              | chaperonin containing                                           |               |        |        |         |       |               |      |       |
| CCT3         | TCP1 subunit 3(CCT3)                                            | NM_0059<br>98 | 466.1  | 354    | 0.02635 | 0.793 |               |      |       |
|              | chromosome 1 open<br>reading frame                              |               |        |        |         |       |               |      |       |
| c1orf116     | 116(C1orf116)                                                   | NM_0239<br>38 | 171.1  | 202.7  | 0.02646 | 1.27  |               |      |       |
|              | chromosome 1 open<br>reading frame                              |               |        |        |         |       |               |      |       |
| C1orf12<br>2 | 122(C1orf122)                                                   | NM_1984<br>46 | 232.5  | 297    | 0.02646 | 1.27  |               |      |       |
|              | INO80 complex                                                   |               |        |        |         |       |               |      |       |
| INO80        | subunit(INO80)                                                  | NM_0175<br>53 | 7156.1 | 8841.3 | 0.02655 | 1.366 |               |      |       |
|              |                                                                 |               |        |        |         |       |               |      |       |
|              |                                                                 | XM_37131<br>4 | 128.5  | 149    | 0.02668 | 1.129 |               |      |       |
|              | G protein-coupled<br>receptor 37(GPR37)                         |               |        |        |         |       |               |      |       |
| GPR37        |                                                                 | NM_0053<br>02 | 167.1  | 146.3  | 0.02682 | 0.87  |               |      |       |
|              | tRNA methyltransferase                                          |               |        |        |         |       |               |      |       |
| TRMO         | O(TRMO)                                                         | NM_0164<br>81 | 296    | 226.6  | 0.0269  | 0.775 |               |      |       |
|              |                                                                 |               |        |        |         |       |               |      |       |
|              |                                                                 | XM_94010<br>3 | 171.6  | 196.9  | 0.02703 | 1.197 | NM_144<br>744 | 0.11 | 40.01 |
|              |                                                                 |               |        |        |         |       |               |      |       |
|              |                                                                 |               |        |        |         |       |               |      |       |
| AKIRIN1      | akirin 1(AKIRIN1)                                               | NM_0245<br>95 | 167.7  | 209.2  | 0.02705 | 1.291 |               |      |       |

|        |                                                                   |              |         |        |         |       |
|--------|-------------------------------------------------------------------|--------------|---------|--------|---------|-------|
| RPS10  | ribosomal protein S10(RPS10)                                      | NM_001014    | 10480.3 | 6847.8 | 0.02706 | 0.756 |
| CLPB   | ClpB homolog, mitochondrial AAA ATPase chaperonin(CLPB)           | NM_030813    | 251.7   | 318.1  | 0.02707 | 1.394 |
| RPL36  | ribosomal protein L36(RPL36)                                      | NM_033643    | 1757.7  | 1029   | 0.0272  | 0.689 |
|        |                                                                   | XR_037945    | 139.2   | 117.9  | 0.02725 | 0.833 |
| CDCA8  | cell division cycle associated 8(CDCA8)                           | NM_018101    | 214.8   | 163.5  | 0.02732 | 0.769 |
|        |                                                                   | XM_928122    | 224.9   | 260.5  | 0.02733 | 1.261 |
| RPL7P9 | ribosomal protein L7 pseudogene 9(RPL7P9)                         | NM_001093763 | 330.3   | 242.5  | 0.02744 | 0.739 |
|        |                                                                   | XM_497182    | 114.3   | 104.9  | 0.02747 | 0.866 |
| COPS4  | COP9 signalosome subunit 4(COPS4)                                 | NM_016129    | 184.8   | 147.3  | 0.02761 | 0.781 |
| magoh  | mago homolog, exon junction complex core component(MAGOH)         | NM_002370    | 158.5   | 197.2  | 0.0278  | 1.242 |
| DPM1   | dolichyl-phosphate mannosyltransferase subunit 1, catalytic(DPM1) | NM_003859    | 135.3   | 118.4  | 0.0278  | 0.854 |
|        |                                                                   | XM_938599    | 827.3   | 479.3  | 0.02787 | 0.628 |

|               |                                                                         |                  |        |        |         |       |
|---------------|-------------------------------------------------------------------------|------------------|--------|--------|---------|-------|
|               |                                                                         | XR_03873<br>8    | 359.9  | 244.6  | 0.02806 | 0.701 |
| BRK1          | BRICK1, SCAR/WAVE<br>actin nucleating<br>complex subunit(BRK1)          | NM_0184<br>62    | 543.3  | 399.1  | 0.02812 | 0.779 |
|               |                                                                         | XM_00112<br>6896 | 137.5  | 127.4  | 0.02812 | 0.9   |
| BRX1          | BRX1, biogenesis of<br>ribosomes(BRIX1)                                 | NM_0183<br>21    | 163.7  | 139.9  | 0.02812 | 0.779 |
|               |                                                                         | DB337588         | 119.6  | 138.6  | 0.02814 | 1.116 |
| HS3ST3<br>A1  | heparan sulfate-<br>glucosamine 3-<br>sulfotransferase<br>3A1(HS3ST3A1) | NM_0060<br>42    | 139.9  | 126.6  | 0.0282  | 0.88  |
|               |                                                                         | XM_93214<br>3    | 246.4  | 292.3  | 0.02853 | 1.259 |
| C14orf1<br>32 | chromosome 14 open<br>reading frame<br>132(C14orf132)                   | NM_0202<br>15    | 189.3  | 156.8  | 0.02853 | 0.827 |
|               |                                                                         | XM_93890<br>3    | 197.6  | 153.7  | 0.02877 | 0.772 |
| ZNF652        | zinc finger protein<br>652(ZNF652)                                      | NM_0148<br>97    | 6050.7 | 7159.2 | 0.02886 | 1.292 |
| MED20         | mediator complex<br>subunit 20(MED20)                                   | NM_0042<br>75    | 542.5  | 381.9  | 0.02887 | 0.75  |
| Tceal7        | transcription elongation<br>factor A like 7(TCEAL7)                     | NM_1522<br>78    | 136.7  | 118.4  | 0.02892 | 0.841 |
| ARMC8         | armadillo repeat<br>containing 8(ARMC8)                                 | NM_0153<br>96    | 296.8  | 352.5  | 0.02894 | 1.304 |

|              |                                                            |                  |         |        |         |       |
|--------------|------------------------------------------------------------|------------------|---------|--------|---------|-------|
| MSLN         | mesothelin(MSLN)                                           | NM_0134<br>04    | 120.5   | 139.3  | 0.02896 | 1.115 |
| LRRFIP2      | LRR binding FLII<br>interacting protein<br>2(LRRFIP2)      | NM_0177<br>24    | 1687.3  | 2879.9 | 0.02898 | 1.937 |
| SHISA4       | shisa family member<br>4(SHISA4)                           | NM_1981<br>49    | 103.6   | 122.5  | 0.02903 | 1.112 |
|              |                                                            | XR_01667<br>0    | 139.4   | 125.4  | 0.02906 | 0.87  |
| SIL1         | SIL1 nucleotide<br>exchange factor(SIL1)                   | NM_0010<br>37633 | 167.1   | 180.6  | 0.02911 | 1.372 |
| SIL1         | SIL1 nucleotide<br>exchange factor(SIL1)                   | NM_0010<br>37633 | 332.5   | 405.8  | 0.02911 | 1.372 |
| COLGAL<br>T1 | collagen beta(1-<br>O)galactosyltransferase<br>1(COLGALT1) | NM_0246<br>56    | 211.1   | 272.1  | 0.02925 | 1.385 |
| PLCD1        | phospholipase C delta<br>1(PLCD1)                          | NM_0062<br>25    | 212.9   | 264.2  | 0.02952 | 1.277 |
| FCER1G       | Fc fragment of IgE<br>receptor Ig(FCER1G)                  | NM_0041<br>06    | 1717.1  | 2748.9 | 0.02961 | 1.797 |
|              |                                                            | XM_37642<br>0    | 10758.5 | 7086   | 0.02965 | 0.747 |
| ZNF548       | zinc finger protein<br>548(ZNF548)                         | NM_1529<br>09    | 174.9   | 153.3  | 0.02966 | 0.875 |
| TNPO1        | transportin 1(TNPO1)                                       | NM_1531<br>88    | 139.4   | 132.5  | 0.02976 | 0.751 |
| TNPO1        | transportin 1(TNPO1)                                       | NM_1531<br>88    | 266.6   | 235.8  | 0.02976 | 0.751 |
| TNPO1        | transportin 1(TNPO1)                                       | NM_1531<br>88    | 463.8   | 330.8  | 0.02976 | 0.751 |
|              |                                                            | BX111413         | 115.3   | 141.8  | 0.02997 | 1.191 |

|        |                                             |                  |        |        |         |       |
|--------|---------------------------------------------|------------------|--------|--------|---------|-------|
| CRCP   | CGRP receptor component(CRCP)               | NM_0144<br>78    | 125.3  | 131.5  | 0.03    | 1.344 |
| CRCT1  | cysteine rich C-terminal 1(CRCT1)           | NM_0190<br>60    | 3804.2 | 4477.9 | 0.03    | 1.344 |
| TRIM45 | tripartite motif containing 45(TRIM45)      | NM_0251<br>88    | 179.4  | 192.9  | 0.03024 | 1.101 |
| NEK11  | NIMA related kinase 11(NEK11)               | NM_1459<br>10    | 118.5  | 140.4  | 0.03027 | 1.14  |
| PSMG1  | proteasome assembly chaperone 1(PSMG1)      | NM_2034<br>33    | 595    | 441.6  | 0.03029 | 0.784 |
|        |                                             | BX091766         | 141.2  | 160.9  | 0.03045 | 1.14  |
|        |                                             | AK095707         | 178.6  | 224.2  | 0.03046 | 1.343 |
| BTF3L4 | basic transcription factor 3 like 4(BTF3L4) | NM_1522<br>65    | 224.9  | 184.8  | 0.03066 | 0.811 |
| BTG1   | BTG anti-proliferation factor 1(BTG1)       | NM_0017<br>31    | 282.1  | 226.1  | 0.03066 | 0.811 |
|        |                                             | XM_93738<br>2    | 120.7  | 138.1  | 0.03067 | 1.094 |
| BICC1  | BicC family RNA binding protein 1(BICC1)    | NM_0010<br>80512 | 105.2  | 134.3  | 0.03069 | 1.203 |
|        |                                             | XM_94110<br>7    | 125.4  | 146    | 0.03087 | 1.131 |
|        |                                             | XM_92637<br>0    | 171.7  | 134.2  | 0.03095 | 0.778 |
| NOXA1  | NADPH oxidase activator 1(NOXA1)            | NM_0066<br>47    | 269.4  | 350.3  | 0.031   | 1.421 |
| RBM34  | RNA binding motif protein 34(RBM34)         | NM_0150<br>14    | 123    | 110.9  | 0.03116 | 0.863 |
| ZNF80  | zinc finger protein 80(ZNF80)               | NM_0071<br>36    | 120.4  | 140.4  | 0.0312  | 1.121 |

|         |                                                    |                  |       |       |         |       |
|---------|----------------------------------------------------|------------------|-------|-------|---------|-------|
| BAIAP2  | BAI1 associated protein 2(BAIAP2)                  | NM_0063<br>40    | 130.3 | 152.2 | 0.0313  | 1.127 |
| BAIAP2  | BAI1 associated protein 2(BAIAP2)                  | NM_0174<br>50    | 195.3 | 221.3 | 0.0313  | 1.127 |
|         |                                                    | CF552427         | 186.5 | 227.4 | 0.03139 | 1.315 |
| NFYA    | nuclear transcription factor Y subunit alpha(NFYA) | NM_0025<br>05    | 138.8 | 126   | 0.03151 | 0.895 |
| CACYBP  | calcyclin binding protein(CACYBP)                  | NM_0144<br>12    | 151.6 | 140.4 | 0.03156 | 0.915 |
|         |                                                    | XR_03937<br>3    | 261.1 | 185.7 | 0.03168 | 0.712 |
|         |                                                    | XM_00172<br>0622 | 150.1 | 130.2 | 0.03172 | 0.851 |
| ZNF2    | zinc finger protein 2(ZNF2)                        | NM_0210<br>88    | 117.1 | 138.6 | 0.03172 | 1.125 |
| OSBPL2  | oxysterol binding protein like 2(OSBPL2)           | NM_0010<br>01691 | 146.9 | 170.7 | 0.03173 | 1.143 |
| PLAC8L1 | PLAC8 like 1(PLAC8L1)                              | NM_0010<br>29869 | 127.1 | 117.6 | 0.03174 | 0.882 |
| AGXT    | alanine-glyoxylate aminotransferase(AGXT)          | NM_0000<br>30    | 117.7 | 140.3 | 0.03175 | 1.134 |
| ALAD    | aminolevulinate dehydratase(ALAD)                  | NM_0010<br>03945 | 125.9 | 139.5 | 0.03182 | 1.559 |
|         |                                                    | XM_92941<br>8    | 140.6 | 130.1 | 0.03182 | 0.901 |
| ALAS1   | 5'-aminolevulinate synthase 1(ALAS1)               | NM_0006<br>88    | 282.5 | 411   | 0.03182 | 1.559 |
| CGN     | cingulin(CGN)                                      | NM_0207<br>70    | 217.7 | 177.4 | 0.03185 | 0.812 |

|          |                                                          |          |        |        |         |       |
|----------|----------------------------------------------------------|----------|--------|--------|---------|-------|
|          | SUMO1 activating enzyme subunit                          | NM_0055  |        |        |         |       |
| SAE1     | 1(SAE1)                                                  | 00       | 793.7  | 462.1  | 0.03205 | 0.628 |
|          | PPFIA binding protein                                    | NM_0036  |        |        |         |       |
| PPFIBP1  | 1(PPFIBP1)                                               | 22       | 120.6  | 140.5  | 0.0321  | 0.827 |
|          | PPFIA binding protein                                    | NM_0036  |        |        |         |       |
| PPFIBP1  | 1(PPFIBP1)                                               | 22       | 128.3  | 110.6  | 0.0321  | 0.827 |
|          | PPFIA binding protein                                    | NM_0036  |        |        |         |       |
| PPFIBP1  | 1(PPFIBP1)                                               | 22       | 183    | 171.5  | 0.0321  | 0.827 |
|          | ARP3 actin related protein 3 homolog                     | NM_0204  |        |        |         |       |
| ACTR3B   | B(ACTR3B)                                                | 45       | 310.8  | 169.9  | 0.0321  | 0.555 |
|          | AKT serine/threonine kinase 3(AKT3)                      | NM_0054  |        |        |         |       |
| AKT3     |                                                          | 65       | 642.2  | 479.4  | 0.03212 | 0.795 |
|          |                                                          | XR_03767 |        |        |         |       |
|          |                                                          | 3        | 2180.1 | 1427.4 | 0.03212 | 0.712 |
|          |                                                          | XM_94106 |        |        |         |       |
|          |                                                          | 4        | 124.6  | 143.6  | 0.03213 | 1.104 |
|          | v-mos Moloney murine sarcoma viral oncogene homolog(MOS) | NM_0053  |        |        |         |       |
| MOS      |                                                          | 72       | 116.5  | 111.6  | 0.03233 | 0.909 |
| KIAA0513 |                                                          | NM_0147  |        |        |         |       |
|          | KIAA0513(KIAA0513)                                       | 32       | 389.9  | 525.8  | 0.03238 | 1.61  |
|          |                                                          | NM_0147  |        |        |         |       |
| SLK      | STE20 like kinase(SLK)                                   | 20       | 153.9  | 138.2  | 0.03257 | 0.872 |
|          |                                                          | XM_00171 |        |        |         |       |
|          |                                                          | 6468     | 127.3  | 151    | 0.03262 | 1.168 |



|         |                                                                              |              |       |       |         |       |
|---------|------------------------------------------------------------------------------|--------------|-------|-------|---------|-------|
| SPECC1L | sperm antigen with calponin homology and coiled-coil domains 1 like(SPECC1L) | NM_015330    | 130.9 | 118.1 | 0.03266 | 0.855 |
| SPECC1L | sperm antigen with calponin homology and coiled-coil domains 1 like(SPECC1L) | NM_015330    | 736   | 609.6 | 0.03266 | 0.855 |
| KLHL28  | kelch like family member 28(KLHL28)                                          | NM_017658    | 224.6 | 210.3 | 0.03268 | 1.416 |
| KLHL3   | kelch like family member 3(KLHL3)                                            | NM_017415    | 291.1 | 369.6 | 0.03268 | 1.416 |
|         |                                                                              | XM_001717865 | 124.3 | 138.6 | 0.03272 | 1.082 |
| HINFP   | histone H4 transcription factor(HINFP)                                       | NM_015517    | 276.6 | 207.7 | 0.03275 | 0.756 |
| HIKESHI | Hikeshi, heat shock protein nuclear import factor(HIKESHI)                   | NM_016401    | 136.8 | 132.8 | 0.03275 | 0.756 |
| NUMA1   | nuclear mitotic apparatus protein 1(NUMA1)                                   | NM_006185    | 158   | 149.5 | 0.03284 | 0.849 |
| NUMA1   | nuclear mitotic apparatus protein 1(NUMA1)                                   | NM_006185    | 368.7 | 296   | 0.03284 | 0.849 |
| CNIH2   | cornichon family AMPA receptor auxiliary protein 2(CNIH2)                    | NM_182553    | 396.4 | 282.3 | 0.03292 | 0.736 |
| CNIH1   | cornichon family AMPA receptor auxiliary protein 1(CNIH1)                    | NM_005776    | 290.2 | 227.5 | 0.03292 | 0.736 |

|         |                                                   |              |         |        |         |       |
|---------|---------------------------------------------------|--------------|---------|--------|---------|-------|
|         |                                                   | XM_37678     |         |        |         |       |
|         |                                                   | 7            | 323.8   | 214.6  | 0.03295 | 0.663 |
| GNB3    | G protein subunit beta 3(GNB3)                    | NM_002075    | 150.3   | 133.3  | 0.03302 | 0.871 |
|         |                                                   | XM_001722111 | 1860.4  | 2514.9 | 0.03305 | 1.48  |
| ZKSCAN8 | zinc finger with KRAB and SCAN domains 8(ZKSCAN8) | NM_006298    | 119.2   | 108.3  | 0.03323 | 0.861 |
|         |                                                   | CV318379     | 146.9   | 159.7  | 0.03346 | 1.073 |
|         |                                                   | XM_938181    | 11401.5 | 8116   | 0.03346 | 0.793 |
| RPS4X   | ribosomal protein S4, X-linked(RPS4X)             | NM_001007    | 4554.2  | 2742.6 | 0.03348 | 0.735 |
| RPS4X   | ribosomal protein S4, X-linked(RPS4X)             | NM_001007    | 4921    | 3536.8 | 0.03348 | 0.735 |
| FBXW5   | F-box and WD repeat domain containing 5(FBXW5)    | NM_018998    | 173.6   | 137.2  | 0.03351 | 0.794 |
|         |                                                   | XM_927451    | 138.7   | 146.7  | 0.03351 | 0.68  |
|         |                                                   | XM_927451    | 727.6   | 471.4  | 0.03351 | 0.68  |
| IL9     | interleukin 9(IL9)                                | NM_000590    | 291.5   | 203.4  | 0.03356 | 0.735 |
| PAXIP1  | PAX interacting protein 1(PAXIP1)                 | NM_007349    | 237.5   | 195.8  | 0.03361 | 0.832 |
| AMY1B   | amylase, alpha 1B (salivary)(AMY1B)               | NM_001008218 | 127.8   | 133.2  | 0.03373 | 0.655 |

|             |                                                                                                                        |                  |         |         |         |       |
|-------------|------------------------------------------------------------------------------------------------------------------------|------------------|---------|---------|---------|-------|
| AMY1C       | amylase, alpha 1C<br>(salivary)(AMY1C)                                                                                 | NM_0010<br>08219 | 2362.1  | 1459.6  | 0.03373 | 0.655 |
| SMARCD1     | SWI/SNF related, matrix<br>associated, actin<br>dependent regulator of<br>chromatin, subfamily d,<br>member 1(SMARCD1) | NM_0030<br>76    | 315.6   | 249.2   | 0.03397 | 0.811 |
| AFTPH       | aftiphilin(AFTPH)                                                                                                      | NM_0176<br>57    | 131.3   | 118.2   | 0.03407 | 0.866 |
| IL19        | interleukin 19(IL19)                                                                                                   | NM_0133<br>71    | 11297.9 | 13722.9 | 0.03409 | 1.276 |
| CEP104      | centrosomal protein<br>104(CEP104)                                                                                     | NM_0147<br>04    | 176.3   | 167.3   | 0.03415 | 1.172 |
| CEP112      | centrosomal protein<br>112(CEP112)                                                                                     | NM_1450<br>36    | 204.2   | 229.3   | 0.03415 | 1.172 |
| RPL36A<br>L | ribosomal protein L36a<br>like(RPL36AL)                                                                                | NM_0010<br>01    | 273.2   | 205.1   | 0.03418 | 0.761 |
| RPL36A<br>L | ribosomal protein L36a<br>like(RPL36AL)                                                                                | NM_0010<br>01    | 2736.2  | 2005.2  | 0.03418 | 0.761 |
| GPX3        | glutathione peroxidase<br>3(GPX3)                                                                                      | NM_0020<br>84    | 3152.3  | 6021.5  | 0.03421 | 2.02  |
|             |                                                                                                                        | XR_01724<br>9    | 146.2   | 125.6   | 0.03424 | 0.832 |
| EIF4G2      | eukaryotic translation<br>initiation factor 4 gamma<br>2(EIF4G2)                                                       | NM_0014<br>18    | 557.7   | 376.5   | 0.03426 | 0.71  |
| EIF4G2      | eukaryotic translation<br>initiation factor 4 gamma<br>2(EIF4G2)                                                       | NM_0014<br>18    | 2383.3  | 1905.2  | 0.03426 | 0.71  |

|              |                                                               |          |        |        |         |       |        |       |       |
|--------------|---------------------------------------------------------------|----------|--------|--------|---------|-------|--------|-------|-------|
|              | eukaryotic translation<br>initiation factor 4 gamma           | NM_0014  |        |        |         |       |        |       |       |
| EIF4G2       | 2(EIF4G2)                                                     | 18       | 4924.9 | 3901.3 | 0.03426 | 0.71  |        |       |       |
|              | chorionic gonadotropin<br>beta subunit 5(CGB5)                | NM_0330  |        |        |         |       | NM_017 |       |       |
| CGB5         |                                                               | 43       | 118.3  | 138.9  | 0.03426 | 1.129 | 196    | 14.73 | 0.69  |
|              |                                                               | AI198908 | 128.7  | 116.2  | 0.03434 | 0.874 | 196    | 14.73 | 0.69  |
|              | tubulin alpha<br>1a(TUBA1A)                                   | NM_0060  |        |        |         |       |        |       |       |
| TUBA1A       |                                                               | 09       | 777.6  | 439.7  | 0.03443 | 0.595 |        |       |       |
|              | tubulin alpha<br>1a(TUBA1A)                                   | NM_0060  |        |        |         |       | NM_017 |       |       |
| TUBA1A       |                                                               | 09       | 6647.5 | 4557.3 | 0.03443 | 0.595 | 196    | 14.73 | 0.69  |
| ARHGA<br>P12 | Rho GTPase activating<br>protein 12(ARHGAP12)                 | NM_0182  |        |        |         |       |        |       |       |
|              |                                                               | 87       | 907.2  | 943    | 0.03445 | 1.153 |        |       |       |
|              |                                                               | XM_93367 |        |        |         |       |        |       |       |
|              |                                                               | 9        | 125.4  | 155.5  | 0.03449 | 0.777 |        |       |       |
|              |                                                               | XM_93367 |        |        |         |       |        |       |       |
|              |                                                               | 9        | 198    | 156.2  | 0.03449 | 0.777 |        |       |       |
|              | short chain<br>dehydrogenase/reducta<br>se family 42E, member | NM_1451  |        |        |         |       | NM_031 |       |       |
| SDR42E<br>1  | 1(SDR42E1)                                                    | 68       | 119.1  | 135.3  | 0.03451 | 1.091 | 356    | 5.43  | 24.53 |
|              |                                                               | XM_00112 |        |        |         |       | NM_031 |       |       |
|              |                                                               | 8866     | 1655.9 | 2265.5 | 0.03495 | 1.475 | 356    | 5.43  | 24.53 |
|              |                                                               | XR_01702 |        |        |         |       |        |       |       |
|              |                                                               | 9        | 113.3  | 134.8  | 0.0351  | 1.142 |        |       |       |
|              | HYLS1, centriolar and<br>ciliogenesis<br>associated(HYLS1)    | NM_1450  |        |        |         |       |        |       |       |
| HYLS1        |                                                               | 14       | 269.1  | 318.3  | 0.0351  | 1.266 |        |       |       |
|              |                                                               | BF996074 | 1010.1 | 1588.9 | 0.03514 | 1.785 |        |       |       |
|              |                                                               | XM_94451 |        |        |         |       |        |       |       |
|              |                                                               | 3        | 116.1  | 140.1  | 0.0352  | 1.144 |        |       |       |

|          |                                                         |                  |        |        |         |       |               |       |      |
|----------|---------------------------------------------------------|------------------|--------|--------|---------|-------|---------------|-------|------|
|          |                                                         | XR_03787         |        |        |         |       |               |       |      |
|          |                                                         | 3                | 1822.1 | 1195.7 | 0.03524 | 0.738 |               |       |      |
| KIF16B   | kinesin family member<br>16B(KIF16B)                    | NM_0247<br>04    | 649.9  | 787.4  | 0.03528 | 1.355 |               |       |      |
| PPHLN1   | periphilin 1(PPHLN1)                                    | NM_2014<br>40    | 269.4  | 184.8  | 0.03533 | 0.684 |               |       |      |
| FBXO38   | F-box protein<br>38(FBXO38)                             | NM_0307<br>93    | 405.8  | 287    | 0.03534 | 0.724 |               |       |      |
|          |                                                         | XM_00172<br>3702 | 241.1  | 177.9  | 0.0354  | 0.717 |               |       |      |
| ZNF564   | zinc finger protein<br>564(ZNF564)                      | NM_1449<br>76    | 288.5  | 214.5  | 0.0354  | 0.771 |               |       |      |
| ZNF256   | zinc finger protein<br>256(ZNF256)                      | NM_0057<br>73    | 190.1  | 141.7  | 0.03546 | 0.74  |               |       |      |
|          |                                                         | BX093647         | 124.4  | 136    | 0.03547 | 1.056 |               |       |      |
| CDK6     | cyclin dependent kinase<br>6(CDK6)                      | NM_0012<br>59    | 711.9  | 927.2  | 0.03549 | 1.454 |               |       |      |
| RAD9A    | RAD9 checkpoint clamp<br>component A(RAD9A)             | NM_0045<br>84    | 206.7  | 259.8  | 0.03566 | 1.297 |               |       |      |
| NECTIN4  | nectin cell adhesion<br>molecule 4(NECTIN4)             | NM_0309<br>16    | 107.5  | 131.7  | 0.03586 | 1.154 | NM_017<br>135 | 41.45 | 2.88 |
| CSN1S1   | casein alpha<br>s1(CSN1S1)                              | NM_0018<br>90    | 114.5  | 135.7  | 0.0359  | 1.118 | NM_017<br>135 | 41.45 | 2.88 |
|          |                                                         | XM_94251<br>6    | 128.7  | 120.3  | 0.03591 | 0.91  | NM_017<br>135 | 41.45 | 2.88 |
| plekhab2 | pleckstrin homology<br>domain containing<br>B2(PLEKHB2) | NM_0179<br>58    | 124.6  | 126.5  | 0.0361  | 1.306 | NM_017<br>135 | 41.45 | 2.88 |

|             |                                                                |               |        |        |         |       |                  |       |      |
|-------------|----------------------------------------------------------------|---------------|--------|--------|---------|-------|------------------|-------|------|
| plekhb2     | pleckstrin homology domain containing B2(PLEKHB2)              | NM_0179<br>58 | 161.6  | 209.6  | 0.0361  | 1.306 | NM_017<br>135    | 41.45 | 2.88 |
| APP         | amyloid beta precursor protein(APP)                            | NM_2014<br>14 | 1835.9 | 2194.8 | 0.03616 | 1.293 |                  |       |      |
| TBC1D2<br>5 | TBC1 domain family member 25(TBC1D25)                          | NM_0025<br>36 | 130    | 130.3  | 0.03624 | 0.913 |                  |       |      |
| TBC1D2<br>5 | TBC1 domain family member 25(TBC1D25)                          | NM_0025<br>36 | 161.6  | 147.7  | 0.03624 | 0.913 |                  |       |      |
| PIP4K2B     | phosphatidylinositol-5-phosphate 4-kinase type 2 beta(PIP4K2B) | NM_1386<br>87 | 2108.7 | 2678.9 | 0.03626 | 1.448 |                  |       |      |
| DLD         | dihydrolipoamide dehydrogenase(DLD)                            | NM_0001<br>08 | 121.3  | 141.5  | 0.03626 | 1.112 |                  |       |      |
| RHAG        | Rh-associated glycoprotein(RHAG)                               | NM_0003<br>24 | 123.4  | 145.3  | 0.03629 | 1.157 |                  |       |      |
| SCRT1       | scratch family transcriptional repressor 1(SCRT1)              | NM_0313<br>09 | 183.5  | 164.7  | 0.0363  | 0.891 |                  |       |      |
| TXNDC5      | thioredoxin domain containing 5(TXNDC5)                        | NM_0220<br>85 | 203.3  | 147    | 0.03632 | 0.729 | NM_001<br>033653 | 43.46 | 1.56 |
| ITPKB       | inositol-trisphosphate 3-kinase B(ITPKB)                       | NM_0022<br>21 | 4382.8 | 5647.3 | 0.03635 | 1.399 |                  |       |      |
| ITGA9       | integrin subunit alpha 9(ITGA9)                                | NM_0022<br>07 | 178.2  | 204.6  | 0.0364  | 1.182 |                  |       |      |
| NISCH       | nischarin(NISCH)                                               | NM_0071<br>84 | 389.5  | 455.4  | 0.03644 | 1.274 |                  |       |      |
|             |                                                                | XR_01958<br>8 | 9256.9 | 6133.3 | 0.03644 | 0.779 |                  |       |      |

|          |                                                                             |           |        |        |         |       |
|----------|-----------------------------------------------------------------------------|-----------|--------|--------|---------|-------|
| DAZL     | deleted in azoospermia like(DAZL)                                           | NM_001351 | 185.8  | 217.9  | 0.03654 | 1.23  |
|          |                                                                             | XM_937091 | 142.2  | 162.4  | 0.03662 | 1.134 |
|          |                                                                             | XR_041286 | 1954   | 1155.3 | 0.03669 | 0.707 |
|          |                                                                             | XR_041286 | 5828   | 3336.9 | 0.03669 | 0.707 |
| CCDC103  | coiled-coil domain containing 103(CCDC103)                                  | NM_213607 | 3129.2 | 3781.1 | 0.03679 | 1.348 |
| KHK      | ketohexokinase(KHK)                                                         | NM_000221 | 300    | 214.6  | 0.03679 | 0.795 |
| KHDRBS3  | KH RNA binding domain containing, signal transduction associated 3(KHDRBS3) | NM_006558 | 153.4  | 125.1  | 0.03679 | 0.795 |
| HSCB     | HscB mitochondrial iron-sulfur cluster cochaperone(HSCB)                    | NM_172002 | 213.9  | 244.4  | 0.03683 | 1.189 |
| HSD11B1  | hydroxysteroid 11-beta dehydrogenase 1(HSD11B1)                             | NM_181755 | 411.9  | 490.6  | 0.03683 | 1.189 |
| CMTM6    | CKLF like MARVEL transmembrane domain containing 6(CMTM6)                   | NM_017801 | 209.9  | 235.3  | 0.03685 | 1.184 |
| EPB41L4B | erythrocyte membrane protein band 4.1 like 4B(EPB41L4B)                     | NM_019114 | 1100.7 | 755.6  | 0.03692 | 0.736 |

|         |                                                       |          |        |        |         |       |        |       |       |
|---------|-------------------------------------------------------|----------|--------|--------|---------|-------|--------|-------|-------|
|         |                                                       | XR_01595 |        |        |         |       |        |       |       |
|         |                                                       | 4        | 195.4  | 151.5  | 0.03709 | 0.781 |        |       |       |
|         |                                                       | XR_03856 |        |        |         |       |        |       |       |
|         |                                                       | 8        | 1456.6 | 749.2  | 0.0371  | 0.592 |        |       |       |
|         |                                                       | XR_03856 |        |        |         |       |        |       |       |
|         |                                                       | 8        | 2160.6 | 1272.1 | 0.0371  | 0.592 |        |       |       |
| CNOT7   | CCR4-NOT transcription complex subunit 7(CNOT7)       | NM_0133  |        |        |         |       |        |       |       |
|         |                                                       | 54       | 300.1  | 245.7  | 0.03711 | 0.835 |        |       |       |
| CNOT8   | CCR4-NOT transcription complex subunit 8(CNOT8)       | NM_0047  |        |        |         |       |        |       |       |
|         |                                                       | 79       | 472.5  | 373.6  | 0.03711 | 0.835 |        |       |       |
| REXO2   | RNA exonuclease 2(REXO2)                              | NM_0155  |        |        |         |       |        |       |       |
|         |                                                       | 23       | 1022.6 | 690.5  | 0.03718 | 0.758 |        |       |       |
| CSTF2   | cleavage stimulation factor subunit 2(CSTF2)          | NM_0013  |        |        |         |       |        |       |       |
|         |                                                       | 25       | 163.5  | 147    | 0.03721 | 0.889 |        |       |       |
| LYPLA1  | lysophospholipase I(LYPLA1)                           | NM_0063  |        |        |         |       |        |       |       |
|         |                                                       | 30       | 121.9  | 115.9  | 0.03728 | 0.898 |        |       |       |
| ATP9A   | ATPase phospholipid transporting 9A (putative)(ATP9A) | NM_0060  |        |        |         |       | NM_134 |       |       |
|         |                                                       | 45       | 275.1  | 167.7  | 0.03729 | 0.599 | 407    | 50.47 | 11.16 |
| MRPS18A | mitochondrial ribosomal protein S18A(MRPS18A)         | NM_0181  |        |        |         |       |        |       |       |
|         |                                                       | 35       | 324.5  | 352.4  | 0.03732 | 1.217 |        |       |       |
| SAMD9   | sterile alpha motif domain containing 9(SAMD9)        | NM_0176  |        |        |         |       |        |       |       |
|         |                                                       | 54       | 120.6  | 141.6  | 0.03741 | 1.146 |        |       |       |
| CEPT1   | choline/ethanolamine phosphotransferase 1(CEPT1)      | NM_0060  |        |        |         |       |        |       |       |
|         |                                                       | 90       | 154.2  | 174.9  | 0.03741 | 1.121 |        |       |       |



|         |                                                                            |           |        |        |         |       |
|---------|----------------------------------------------------------------------------|-----------|--------|--------|---------|-------|
| PCDHGB2 | protocadherin gamma subfamily B, 2(PCDHGB2)                                | NM_032096 | 143.8  | 130.5  | 0.03748 | 0.894 |
| CREB1   | cAMP responsive element binding protein 1(CREB1)                           | NM_004379 | 128.9  | 222.5  | 0.03756 | 1.945 |
| UBXN6   | UBX domain protein 6(UBXN6)                                                | NM_025241 | 534    | 616.5  | 0.03757 | 1.293 |
| SNAP23  | synaptosome associated protein 23(SNAP23)                                  | NM_003825 | 130.1  | 127.7  | 0.03759 | 0.848 |
| SNAP23  | synaptosome associated protein 23(SNAP23)                                  | NM_003825 | 188    | 159.5  | 0.03759 | 0.848 |
| CCZ1    | CCZ1 homolog, vacuolar protein trafficking and biogenesis associated(CCZ1) | NM_015622 | 1404.8 | 1039.2 | 0.03761 | 0.811 |
|         |                                                                            | XR_037525 | 501.1  | 353.6  | 0.03764 | 0.722 |
|         |                                                                            | XR_017589 | 227.2  | 170.5  | 0.03766 | 0.738 |
|         |                                                                            | XM_928982 | 96.2   | 117.8  | 0.03772 | 1.145 |
| DYRK1B  | dual specificity tyrosine phosphorylation regulated kinase 1B(DYRK1B)      | NM_006484 | 145    | 132.5  | 0.03774 | 0.886 |
|         |                                                                            | BU078529  | 120.8  | 137.8  | 0.03804 | 1.097 |

|            |                                                                        |                  |       |       |         |       |                  |      |       |
|------------|------------------------------------------------------------------------|------------------|-------|-------|---------|-------|------------------|------|-------|
| DSP        | desmoplakin(DSP)                                                       | NM_0010<br>08844 | 185.5 | 209.3 | 0.03811 | 1.906 |                  |      |       |
| DST        | dystonin(DST)                                                          | NM_0017<br>23    | 195.6 | 312.7 | 0.03811 | 1.906 |                  |      |       |
| MAX        | MYC associated factor<br>X(MAX)                                        | NM_0023<br>82    | 150.3 | 127.4 | 0.03814 | 0.839 |                  |      |       |
| MBTPS1     | membrane bound<br>transcription factor<br>peptidase, site<br>1(MBTPS1) | NM_0037<br>91    | 210.8 | 197.6 | 0.03838 | 0.84  |                  |      |       |
| MBTPS1     | membrane bound<br>transcription factor<br>peptidase, site<br>1(MBTPS1) | NM_0037<br>91    | 264.4 | 221.2 | 0.03838 | 0.84  |                  |      |       |
| MRPL47     | mitochondrial ribosomal<br>protein L47(MRPL47)                         | NM_0204<br>09    | 181.6 | 147.8 | 0.03839 | 0.802 | NM_001<br>033706 | 2.42 | 10.86 |
|            |                                                                        | XR_01748<br>1    | 146.9 | 129.8 | 0.03843 | 0.876 |                  |      |       |
|            |                                                                        | XR_01561<br>1    | 213.1 | 161.5 | 0.03843 | 0.754 |                  |      |       |
| C1R        | complement C1r(C1R)                                                    | NM_0017<br>33    | 127.4 | 103.8 | 0.03859 | 0.791 |                  |      |       |
|            |                                                                        | XM_93484<br>6    | 144.2 | 174.7 | 0.03862 | 1.208 |                  |      |       |
|            |                                                                        | XM_00172<br>0379 | 792.6 | 491.2 | 0.03869 | 0.63  |                  |      |       |
| COMMD<br>6 | COMM domain<br>containing 6(COMMD6)                                    | NM_2034<br>97    | 700.5 | 520   | 0.03893 | 0.795 | NM_153<br>300    | 0.14 | 61.17 |
|            |                                                                        | XM_00113<br>0742 | 575   | 671.1 | 0.0391  | 1.465 |                  |      |       |

|        |                                                                           |                  |        |        |         |       |               |        |      |
|--------|---------------------------------------------------------------------------|------------------|--------|--------|---------|-------|---------------|--------|------|
|        |                                                                           | XM_00113<br>0742 | 1793.8 | 2373.7 | 0.0391  | 1.465 | NM_032<br>416 | 108.51 | 1.87 |
|        |                                                                           | XR_03893<br>0    | 7887.1 | 5231.1 | 0.03915 | 0.796 |               |        |      |
| ACTR8  | ARP8 actin-related<br>protein 8<br>homolog(ACTR8)                         | NM_0228<br>99    | 169.9  | 145.6  | 0.0392  | 0.855 |               |        |      |
| EIF2B5 | eukaryotic translation<br>initiation factor 2B<br>subunit epsilon(EIF2B5) | NM_0039<br>07    | 450.7  | 360    | 0.03923 | 0.843 |               |        |      |
|        |                                                                           | XR_01780<br>4    | 3711.5 | 2721.1 | 0.03927 | 0.745 |               |        |      |
|        |                                                                           | XR_01780<br>4    | 6448.1 | 3895.8 | 0.03927 | 0.745 |               |        |      |
|        |                                                                           | XM_00172<br>4539 | 729.2  | 435.7  | 0.03931 | 0.651 |               |        |      |
|        |                                                                           | XR_03809<br>7    | 359.1  | 231.6  | 0.03941 | 0.672 |               |        |      |
| KRT2   | keratin 2(KRT2)                                                           | NM_0004<br>23    | 280.2  | 409.7  | 0.03945 | 1.712 |               |        |      |
| EIF2B4 | eukaryotic translation<br>initiation factor 2B<br>subunit delta(EIF2B4)   | NM_1721<br>95    | 450.7  | 360    | 0.03947 | 0.842 |               |        |      |
| EIF2B4 | eukaryotic translation<br>initiation factor 2B<br>subunit delta(EIF2B4)   | NM_0156<br>36    | 398.2  | 321.2  | 0.03947 | 0.842 |               |        |      |
| h2afy  | H2A histone family<br>member Y(H2AFY)                                     | NM_1386<br>09    | 203.6  | 176    | 0.03952 | 0.79  |               |        |      |
| H2AFY2 | H2A histone family<br>member Y2(H2AFY2)                                   | NM_0186<br>49    | 317.1  | 244.3  | 0.03952 | 0.79  |               |        |      |

|            |                                                                                     |                  |        |        |         |       |                  |         |      |
|------------|-------------------------------------------------------------------------------------|------------------|--------|--------|---------|-------|------------------|---------|------|
|            |                                                                                     | XM_00171<br>5145 | 4374.5 | 5415.3 | 0.03959 | 1.418 |                  |         |      |
| CUTA       | cutA divalent cation<br>tolerance<br>homolog(CUTA)                                  | NM_0010<br>14840 | 172.7  | 223.9  | 0.03966 | 1.433 |                  |         |      |
| NCCRP<br>1 | non-specific cytotoxic<br>cell receptor protein 1<br>homolog<br>(zebrafish)(NCCRP1) | NM_0010<br>01414 | 110.2  | 132.7  | 0.03967 | 1.163 | NM_001<br>191088 | 10.07   | 0.03 |
| NCCRP<br>1 | non-specific cytotoxic<br>cell receptor protein 1<br>homolog<br>(zebrafish)(NCCRP1) | NM_0010<br>01414 | 150.6  | 162.5  | 0.03967 | 1.163 | NM_001<br>191088 | 10.07   | 0.03 |
|            |                                                                                     | XM_94358<br>3    | 177.1  | 199.1  | 0.03969 | 1.141 | NM_001<br>191088 | 10.07   | 0.03 |
| NIP7       | NIP7, nucleolar pre-<br>rRNA processing<br>protein(NIP7)                            | NM_0161<br>01    | 238    | 183.9  | 0.03981 | 0.791 |                  |         |      |
| IMPACT     | impact RWD domain<br>protein(IMPACT)                                                | NM_0184<br>39    | 191.3  | 163.5  | 0.03986 | 0.853 |                  |         |      |
|            |                                                                                     | XM_00172<br>5448 | 162.6  | 147.2  | 0.03987 | 0.884 |                  |         |      |
|            |                                                                                     | XM_93289<br>0    | 350.2  | 472.2  | 0.0399  | 1.572 | NM_012<br>496    | 1095.39 | 8.76 |
| SPAG9      | sperm associated<br>antigen 9(SPAG9)                                                | NM_0039<br>71    | 134.7  | 123.2  | 0.04018 | 0.887 |                  |         |      |
| SPAG9      | sperm associated<br>antigen 9(SPAG9)                                                | NM_0039<br>71    | 152.5  | 146.2  | 0.04018 | 0.887 |                  |         |      |
| RPL7       | ribosomal protein<br>L7(RPL7)                                                       | NM_0009<br>71    | 456.2  | 334.9  | 0.04021 | 0.774 |                  |         |      |

|         |                                                                                  |                  |        |        |         |       |
|---------|----------------------------------------------------------------------------------|------------------|--------|--------|---------|-------|
|         | T-cell activation                                                                |                  |        |        |         |       |
| TAGAP   | RhoGTPase activating protein(TAGAP)                                              | NM_0541<br>14    | 137.6  | 116.2  | 0.04031 | 0.825 |
| SIVA1   | SIVA1 apoptosis inducing factor(SIVA1)                                           | NM_0064<br>27    | 265.6  | 244    | 0.04034 | 0.765 |
| SIVA1   | SIVA1 apoptosis inducing factor(SIVA1)                                           | NM_0064<br>27    | 303.4  | 228.5  | 0.04034 | 0.765 |
| WAPL    | WAPL cohesin release factor(WAPL)                                                | NM_0150<br>45    | 274.2  | 229.6  | 0.04046 | 0.86  |
| IFRD2   | interferon related developmental regulator 2(IFRD2)                              | NM_0067<br>64    | 105.8  | 128    | 0.04062 | 1.151 |
| SPCS2P4 | signal peptidase complex subunit 2 homolog (S. cerevisiae) pseudogene 4(SPSC2P4) | NM_0010<br>80536 | 268.6  | 202    | 0.04067 | 0.741 |
|         |                                                                                  | XM_00171<br>5568 | 146.4  | 164.2  | 0.04069 | 1.108 |
| SRGAP3  | SLIT-ROBO Rho GTPase activating protein 3(SRGAP3)                                | NM_0010<br>33117 | 124.3  | 157.2  | 0.04079 | 1.232 |
| SRGAP3  | SLIT-ROBO Rho GTPase activating protein 3(SRGAP3)                                | NM_0010<br>33117 | 195.8  | 246.7  | 0.04079 | 1.232 |
| MT1B    | metallothionein 1B(MT1B)                                                         | NM_0059<br>47    | 1509.5 | 5464.9 | 0.04085 | 3.475 |
| ZNF583  | zinc finger protein 583(ZNF583)                                                  | NM_1524<br>78    | 136.1  | 121.5  | 0.04086 | 0.881 |
| NOP14   | NOP14 nucleolar protein(NOP14)                                                   | NM_0037<br>03    | 121.1  | 144.3  | 0.04086 | 1.152 |

|              |                                                                                  |                  |       |       |         |       |
|--------------|----------------------------------------------------------------------------------|------------------|-------|-------|---------|-------|
| FBXO30       | F-box protein<br>30(FBXO30)                                                      | NM_0321<br>45    | 136   | 116.2 | 0.04094 | 0.842 |
| FBXO32       | F-box protein<br>32(FBXO32)                                                      | NM_0582<br>29    | 154.8 | 154.4 | 0.04094 | 0.842 |
| OGFOD1       | 2-oxoglutarate and iron<br>dependent oxygenase<br>domain containing<br>1(OGFOD1) | NM_0182<br>33    | 128.5 | 113.4 | 0.04099 | 0.851 |
| OGFOD1       | 2-oxoglutarate and iron<br>dependent oxygenase<br>domain containing<br>1(OGFOD1) | NM_0182<br>33    | 132.2 | 128.5 | 0.04099 | 0.851 |
| DYRK1A       | dual specificity tyrosine<br>phosphorylation<br>regulated kinase<br>1A(DYRK1A)   | NM_1304<br>38    | 274.5 | 200.8 | 0.04102 | 0.716 |
| DYRK1A       | dual specificity tyrosine<br>phosphorylation<br>regulated kinase<br>1A(DYRK1A)   | NM_1304<br>37    | 135.2 | 138.6 | 0.04102 | 0.716 |
| RPL17P<br>39 | ribosomal protein L17<br>pseudogene<br>39(RPL17P39)                              | NM_0010<br>93733 | 880.1 | 593.3 | 0.04125 | 0.735 |
| MCHR2        | melanin concentrating<br>hormone receptor<br>2(MCHR2)                            | NM_0325<br>03    | 132.4 | 161.4 | 0.04131 | 1.191 |
|              |                                                                                  | XM_00171<br>8864 | 238.7 | 158.9 | 0.04134 | 0.653 |
|              |                                                                                  | XM_93664<br>0    | 120   | 137.9 | 0.0414  | 1.103 |

|             |                                                                                            |                  |       |       |         |       |
|-------------|--------------------------------------------------------------------------------------------|------------------|-------|-------|---------|-------|
| KLK10       | kallikrein related<br>peptidase 10(KLK10)<br>family with sequence<br>similarity 131 member | NM_0027<br>76    | 576.6 | 407.6 | 0.04141 | 0.747 |
| FAM131<br>B | B(FAM131B)                                                                                 | NM_0146<br>90    | 141.3 | 130   | 0.04142 | 0.894 |
| ZNF100      | zinc finger protein<br>100(ZNF100)                                                         | NM_1735<br>31    | 127.9 | 147.3 | 0.04142 | 1.119 |
| MANBAL      | mannosidase beta<br>like(MANBAL)                                                           | NM_0010<br>03897 | 250   | 286.6 | 0.04144 | 1.226 |
| BTBD6       | BTB domain containing<br>6(BTBD6)                                                          | NM_0332<br>71    | 187.2 | 158   | 0.04147 | 0.851 |
| NOSTRI<br>N | nitric oxide synthase<br>trafficking(NOSTRIN)                                              | NM_0529<br>46    | 223.1 | 288.6 | 0.04147 | 1.434 |
| BTBD3       | BTB domain containing<br>3(BTBD3)                                                          | NM_0149<br>62    | 121.8 | 122.7 | 0.04147 | 0.851 |
| HAX1        | HCLS1 associated<br>protein X-1(HAX1)                                                      | NM_0061<br>18    | 119.9 | 137.9 | 0.04151 | 1.107 |
|             |                                                                                            | XM_00113<br>2706 | 123   | 113.9 | 0.04153 | 0.888 |
| TOPORS      | TOP1 binding<br>arginine/serine rich<br>protein(TOPORS)                                    | NM_0058<br>02    | 136.1 | 120.4 | 0.04162 | 0.858 |
|             |                                                                                            | AI215519         | 149.9 | 167.1 | 0.04181 | 1.127 |
|             |                                                                                            | BG058337         | 238   | 287.3 | 0.04181 | 1.391 |
| PAQR9       | progesterone and adipoQ<br>receptor family member<br>9(PAQR9)                              | NM_1985<br>04    | 128.3 | 264.7 | 0.04194 | 2.447 |
| ZFX         | zinc finger protein, X-<br>linked(ZFX)                                                     | NM_0034<br>10    | 127.2 | 115.6 | 0.04196 | 0.877 |

|           |                                                  |              |        |        |         |       |           |            |
|-----------|--------------------------------------------------|--------------|--------|--------|---------|-------|-----------|------------|
| ZSCAN2    | zinc finger and SCAN domain containing 2(ZSCAN2) | NM_017894    | 124.8  | 140.2  | 0.04197 | 1.084 |           |            |
|           |                                                  | XM_944905    | 142.5  | 159.9  | 0.0421  | 1.098 |           |            |
| KRTAP4-7  | keratin associated protein 4-7(KRTAP4-7)         | NM_033061    | 170.2  | 199.7  | 0.04217 | 1.181 |           |            |
| NRG3      | neuregulin 3(NRG3)                               | NM_001010848 | 199.5  | 227.4  | 0.04225 | 1.213 | NM_013059 | 21.02 0.11 |
|           |                                                  | XR_041205    | 1685.5 | 963.5  | 0.04225 | 0.66  |           |            |
| ADAMTS L4 | ADAMTS like 4(ADAMTSL4)                          | NM_025008    | 172.3  | 150.6  | 0.04228 | 0.865 |           |            |
|           |                                                  | XM_001717156 | 5234.3 | 3571.6 | 0.04231 | 0.82  |           |            |
| CDYL2     | chromodomain Y-like 2(CDYL2)                     | AK023660     | 96.8   | 149.2  | 0.04232 | 1.591 |           |            |
| MED1      | mediator complex subunit 1(MED1)                 | NM_004774    | 204.6  | 169.2  | 0.04239 | 0.827 |           |            |
| MED1      | mediator complex subunit 1(MED1)                 | NM_004774    | 307.3  | 332    | 0.04239 | 0.827 |           |            |
| RTN4IP1   | reticulon 4 interacting protein 1(RTN4IP1)       | NM_032730    | 190.4  | 217.2  | 0.04241 | 1.158 |           |            |
| FNBP1L    | formin binding protein 1 like(FNBP1L)            | NM_001024948 | 122.4  | 146.7  | 0.04244 | 1.138 |           |            |
|           |                                                  | XR_037721    | 388.4  | 306.5  | 0.04263 | 0.837 |           |            |
| LY86      | lymphocyte antigen 86(LY86)                      | NM_004271    | 110    | 145.1  | 0.04263 | 1.304 |           |            |
| KIAA0319L | KIAA0319 like(KIAA0319L)                         | NM_024874    | 329    | 264.8  | 0.04271 | 0.82  |           |            |



|        |                           |          |        |        |         |       |        |       |      |
|--------|---------------------------|----------|--------|--------|---------|-------|--------|-------|------|
|        |                           | XM_00113 |        |        |         |       |        |       |      |
|        |                           | 3527     | 123.9  | 127.7  | 0.04274 | 1.157 |        |       |      |
|        |                           | XM_00113 |        |        |         |       |        |       |      |
|        |                           | 3527     | 142.3  | 165.4  | 0.04274 | 1.157 |        |       |      |
|        |                           | XM_00172 |        |        |         |       | NM_012 |       |      |
|        |                           | 6456     | 155    | 139.4  | 0.04277 | 0.889 | 816    | 19.78 | 2.28 |
| ZNF283 | zinc finger protein       | NM_1818  |        |        |         |       | NM_012 |       |      |
|        | 283(ZNF283)               | 45       | 114.2  | 106.6  | 0.0428  | 0.878 | 816    | 19.78 | 2.28 |
|        | homocysteine inducible    |          |        |        |         |       |        |       |      |
|        | ER protein with ubiquitin |          |        |        |         |       |        |       |      |
| HERPU  | like domain               | NM_0010  |        |        |         |       |        |       |      |
| D1     | 1(HERPUD1)                | 10990    | 278.9  | 211.9  | 0.04286 | 0.775 |        |       |      |
|        | apoptosis associated      | NM_0010  |        |        |         |       |        |       |      |
| AATK   | tyrosine kinase(AATK)     | 80395    | 323.6  | 368.1  | 0.0429  | 1.24  |        |       |      |
|        |                           | XM_94496 |        |        |         |       |        |       |      |
|        |                           | 8        | 107.3  | 125.4  | 0.04293 | 1.095 |        |       |      |
|        | pyroglutamylated          |          |        |        |         |       |        |       |      |
|        | RFamide peptide           | NM_1981  |        |        |         |       |        |       |      |
| QRFPR  | receptor(QRFPR)           | 79       | 1460.7 | 1944.9 | 0.04295 | 1.456 |        |       |      |
|        | LRRC3 downstream          |          |        |        |         |       |        |       |      |
| LRRC3D | neighbor (non-protein     | AL117578 | 125.1  | 118.2  | 0.04296 | 0.902 |        |       |      |
| N      | coding)(LRRC3DN)          |          |        |        |         |       |        |       |      |
|        | meiosis/spermiogenesis    | NM_0010  |        |        |         |       |        |       |      |
| MEIG1  | associated 1(MEIG1)       | 80836    | 129.8  | 146.9  | 0.04297 | 1.102 |        |       |      |
|        | molybdenum cofactor       | NM_0059  |        |        |         |       |        |       |      |
| MOCS1  | synthesis 1(MOCS1)        | 43       | 234.1  | 268.7  | 0.04301 | 1.237 |        |       |      |
|        | CDC like kinase           | NM_0040  |        |        |         |       |        |       |      |
| CLK1   | 1(CLK1)                   | 71       | 219.6  | 172.9  | 0.04302 | 0.787 |        |       |      |
|        | small nuclear             |          |        |        |         |       |        |       |      |
|        | ribonucleoprotein D2      | NM_0045  |        |        |         |       |        |       |      |
| SNRPD2 | polypeptide(SNRPD2)       | 97       | 221.5  | 182.7  | 0.04304 | 0.818 |        |       |      |

|              |                                                      |                  |        |        |         |       |               |      |       |
|--------------|------------------------------------------------------|------------------|--------|--------|---------|-------|---------------|------|-------|
| SNORA18      | small nucleolar RNA,<br>H/ACA box<br>18(SNORA18)     | NR_00295<br>9    | 172    | 154.4  | 0.04316 | 0.892 |               |      |       |
| IL17RE       | interleukin 17 receptor<br>E(IL17RE)                 | NM_1534<br>83    | 120.4  | 137.7  | 0.04321 | 1.093 |               |      |       |
| MYO3B        | myosin IIIB(MYO3B)                                   | NM_1389<br>95    | 696.5  | 949    | 0.04324 | 1.567 |               |      |       |
|              |                                                      | XM_00172<br>1589 | 739.6  | 475.3  | 0.04328 | 0.679 |               |      |       |
| SRSF1        | serine and arginine rich<br>splicing factor 1(SRSF1) | NM_0010<br>78166 | 1563.3 | 1172.5 | 0.0433  | 0.803 |               |      |       |
|              |                                                      | XM_93343<br>7    | 161.6  | 189.5  | 0.0433  | 1.176 |               |      |       |
|              |                                                      | XR_01831<br>6    | 715.5  | 385.9  | 0.0434  | 0.559 |               |      |       |
|              |                                                      | XM_00173<br>2883 | 123.4  | 112.3  | 0.04342 | 0.878 |               |      |       |
| HDLBP        | high density lipoprotein<br>binding protein(HDLBP)   | NM_2033<br>46    | 312.5  | 375    | 0.04353 | 1.404 |               |      |       |
| HDLBP        | high density lipoprotein<br>binding protein(HDLBP)   | NM_0053<br>36    | 111.9  | 118.4  | 0.04353 | 1.404 |               |      |       |
|              |                                                      | XM_93682<br>2    | 199.4  | 156.9  | 0.04358 | 0.781 |               |      |       |
|              |                                                      | XR_01549<br>5    | 137.6  | 122.6  | 0.04358 | 0.87  | NM_031<br>544 | 4.79 | 38.59 |
| SERPIN<br>B7 | serpin family B member<br>7(SERPINB7)                | NM_0037<br>84    | 123.3  | 145.1  | 0.04377 | 1.234 | NM_031<br>544 | 4.79 | 38.59 |

|              |                                                           |                  |        |        |         |       |
|--------------|-----------------------------------------------------------|------------------|--------|--------|---------|-------|
| SERPIN<br>B7 | serpin family B member<br>7(SERPINB7)                     | NM_0037<br>84    | 171.6  | 205.1  | 0.04377 | 1.234 |
| FKBP14       | FK506 binding protein<br>14(FKBP14)                       | NM_0179<br>46    | 142.6  | 156    | 0.04379 | 1.371 |
| FKBP1A       | FK506 binding protein<br>1A(FKBP1A)                       | NM_0008<br>01    | 2187.3 | 2702.4 | 0.04379 | 1.371 |
| PPA2         | pyrophosphatase<br>(inorganic) 2(PPA2)                    | NM_0069<br>03    | 4900.5 | 5967   | 0.04389 | 1.367 |
| RPL21P<br>16 | ribosomal protein L21<br>pseudogene<br>16(RPL21P16)       | NM_0011<br>39505 | 117    | 104.5  | 0.04391 | 0.864 |
|              |                                                           | XR_03786<br>0    | 625.2  | 358.5  | 0.04396 | 0.608 |
| CDCA4        | cell division cycle<br>associated 4(CDCA4)                | NM_1457<br>01    | 134.6  | 101.2  | 0.04402 | 0.741 |
|              |                                                           | XR_03854<br>3    | 5646.2 | 3974   | 0.04404 | 0.775 |
| RAP1GD<br>S1 | Rap1 GTPase-GDP<br>dissociation stimulator<br>1(RAP1GDS1) | NM_0211<br>59    | 215.8  | 175.3  | 0.04412 | 0.831 |
| TRAPPC<br>2  | trafficking protein<br>particle complex<br>2(TRAPPC2)     | NM_0010<br>11658 | 140.7  | 131.4  | 0.04412 | 0.918 |
|              |                                                           | XR_03940<br>7    | 620.8  | 465    | 0.04422 | 0.801 |
| NANS         | N-acetylneuraminatase<br>synthase(NANS)                   | NM_0189<br>46    | 223.9  | 169    | 0.04426 | 0.748 |
| SEC23A       | Sec23 homolog A, coat<br>complex II<br>component(SEC23A)  | NM_0063<br>64    | 115.2  | 133.6  | 0.04427 | 1.109 |

|              |                                                    |               |        |        |         |       |
|--------------|----------------------------------------------------|---------------|--------|--------|---------|-------|
| SEC23A       | Sec23 homolog A, coat complex II component(SEC23A) | NM_0063<br>64 | 132.4  | 130.5  | 0.04427 | 1.109 |
| ADAMD<br>EC1 | ADAM like decysin 1(ADAMDEC1)                      | NM_0144<br>79 | 121.7  | 106.7  | 0.04427 | 0.86  |
| RHEB         | Ras homolog enriched in brain(RHEB)                | NM_0056<br>14 | 376    | 314.4  | 0.0443  | 0.861 |
| RNA5S9       | RNA, 5S ribosomal 9(RNA5S9)                        | NR_02337<br>1 | 186.3  | 225.7  | 0.0443  | 1.246 |
| RAX2         | retina and anterior neural fold homeobox 2(RAX2)   | NM_0327<br>53 | 174.1  | 214.2  | 0.0444  | 1.273 |
| RAX2         | retina and anterior neural fold homeobox 2(RAX2)   | NM_0327<br>53 | 1050.1 | 1081.8 | 0.0444  | 1.273 |
| XRCC2        | X-ray repair cross complementing 2(XRCC2)          | NM_0054<br>31 | 118.1  | 123.6  | 0.04448 | 1.462 |
| XRCC2        | X-ray repair cross complementing 2(XRCC2)          | NM_0054<br>31 | 1119.2 | 1461.7 | 0.04448 | 1.462 |
|              |                                                    | XR_01561<br>5 | 212.3  | 247.8  | 0.04478 | 1.255 |
|              |                                                    | XR_03808<br>1 | 104.2  | 124.1  | 0.04482 | 1.134 |
| LNPEP        | leucyl and cystinyl aminopeptidase(LNPEP )         | NM_0055<br>75 | 1079.3 | 1296.6 | 0.04486 | 1.342 |
| BNIP1        | BCL2 interacting protein 1(BNIP1)                  | NM_0139<br>80 | 2942.2 | 4061.6 | 0.04487 | 1.536 |

|        |                                                   |                  |        |       |         |       |
|--------|---------------------------------------------------|------------------|--------|-------|---------|-------|
|        |                                                   | NM_0010<br>80831 | 206.3  | 168   | 0.0449  | 0.82  |
| AKTIP  | AKT interacting<br>protein(AKTIP)                 | NM_0010<br>12398 | 117.9  | 111.6 | 0.04493 | 0.881 |
| SUGP1  | SURP and G-patch<br>domain containing<br>1(SUGP1) | NM_1828<br>12    | 189.5  | 213.6 | 0.04506 | 1.172 |
|        |                                                   | XR_03711<br>7    | 201.4  | 150.5 | 0.0452  | 0.664 |
|        |                                                   | XR_03711<br>7    | 1539.6 | 919.6 | 0.0452  | 0.664 |
|        |                                                   | XM_93746<br>9    | 111.1  | 133.5 | 0.04522 | 1.142 |
|        |                                                   | XM_00172<br>5687 | 1333   | 862.6 | 0.04531 | 0.72  |
|        |                                                   | BM977869         | 133.1  | 121.8 | 0.04538 | 0.89  |
| ZNF654 | zinc finger protein<br>654(ZNF654)                | NM_0182<br>93    | 99.8   | 106.1 | 0.04544 | 0.876 |
| ZNF654 | zinc finger protein<br>654(ZNF654)                | NM_0182<br>93    | 116.2  | 112.9 | 0.04544 | 0.876 |
| ZNF654 | zinc finger protein<br>654(ZNF654)                | NM_0182<br>93    | 120.1  | 110.9 | 0.04544 | 0.876 |
| ZNF654 | zinc finger protein<br>654(ZNF654)                | NM_0182<br>93    | 130.5  | 119.2 | 0.04544 | 0.876 |
|        |                                                   | XM_04529<br>0    | 611.7  | 424.1 | 0.04551 | 0.745 |
| ZDHHC1 | zinc finger DHHC-type<br>containing 1(ZDHHC1)     | NM_0133<br>04    | 240.9  | 295.7 | 0.04553 | 1.287 |
| DMC1   | DNA meiotic<br>recombinase 1(DMC1)                | NM_0070<br>68    | 321.1  | 355.3 | 0.04558 | 1.21  |

|             |                                                                       |                  |        |        |         |       |
|-------------|-----------------------------------------------------------------------|------------------|--------|--------|---------|-------|
| RPS21       | ribosomal protein<br>S21(RPS21)                                       | NM_0010<br>24    | 165.5  | 149.7  | 0.04564 | 0.898 |
|             |                                                                       | XM_00171<br>9081 | 312.4  | 211.5  | 0.04572 | 0.682 |
|             |                                                                       | XM_93590<br>7    | 658.5  | 437.2  | 0.04581 | 0.702 |
| SLC10A<br>7 | solute carrier family 10<br>member 7(SLC10A7)                         | NM_0010<br>29998 | 132.8  | 127.5  | 0.04595 | 0.932 |
| SLC10A<br>7 | solute carrier family 10<br>member 7(SLC10A7)                         | NM_0010<br>29998 | 150.1  | 141.2  | 0.04595 | 0.932 |
|             |                                                                       | BU622756         | 122.4  | 141.6  | 0.04598 | 1.108 |
| SNHG8       | small nucleolar RNA<br>host gene 8(SNHG8)                             | NR_00358<br>4    | 607.7  | 410.6  | 0.046   | 0.724 |
| ZKSCAN<br>3 | zinc finger with KRAB<br>and SCAN domains<br>3(ZKSCAN3)               | NM_0244<br>93    | 132.8  | 124.1  | 0.04603 | 0.896 |
| NECAB2      | N-terminal EF-hand<br>calcium binding protein<br>2(NECAB2)            | NM_0190<br>65    | 166.7  | 183.6  | 0.04606 | 1.104 |
| KYAT1       | kynurenine<br>aminotransferase<br>1(KYAT1)                            | NM_0040<br>59    | 155.2  | 136.1  | 0.04607 | 0.857 |
| MFSD14<br>C | major facilitator<br>superfamily domain<br>containing<br>14C(MFSD14C) | NR_00289<br>4    | 3646.4 | 4446.2 | 0.04622 | 1.378 |
| GLE1        | GLE1, RNA export<br>mediator(GLE1)                                    | NM_0010<br>03722 | 468.2  | 977    | 0.04625 | 2.408 |
|             |                                                                       | XM_92929<br>7    | 131.5  | 147.9  | 0.04627 | 1.092 |

|        |                                                              |                  |        |        |         |       |
|--------|--------------------------------------------------------------|------------------|--------|--------|---------|-------|
| CBX5   | chromobox 5(CBX5)                                            | NM_0121<br>17    | 173.6  | 145.5  | 0.04627 | 0.821 |
| TPM1   | tropomyosin 1<br>(alpha)(TPM1)                               | NM_0010<br>18008 | 130.7  | 155.5  | 0.04645 | 1.158 |
| TPM1   | tropomyosin 1<br>(alpha)(TPM1)                               | NM_0010<br>18008 | 141.1  | 143.1  | 0.04645 | 1.158 |
| GRK3   | G protein-coupled<br>receptor kinase<br>3(GRK3)              | NM_0051<br>60    | 1794   | 2516.4 | 0.04659 | 1.552 |
| RANBP1 | RAN binding protein<br>1(RANBP1)                             | NM_0028<br>82    | 344.3  | 225    | 0.04659 | 0.677 |
| RANBP1 | RAN binding protein<br>1(RANBP1)                             | NM_0028<br>82    | 879.4  | 649.2  | 0.04659 | 0.677 |
| ANXA1  | annexin A1(ANXA1)                                            | NM_0007<br>00    | 277.1  | 186    | 0.04679 | 0.663 |
|        |                                                              | XR_04049<br>7    | 152.9  | 188.2  | 0.04695 | 1.212 |
|        |                                                              | XM_93973<br>0    | 126.9  | 148.6  | 0.04695 | 1.123 |
| ZNF549 | zinc finger protein<br>549(ZNF549)                           | NM_1532<br>63    | 178.3  | 196.9  | 0.04698 | 1.137 |
| ZNF549 | zinc finger protein<br>549(ZNF549)                           | NM_1532<br>63    | 6038.9 | 7142.4 | 0.04698 | 1.137 |
|        |                                                              | XM_92722<br>8    | 137.4  | 131.4  | 0.04711 | 0.927 |
|        |                                                              | BI827719         | 117.1  | 135.8  | 0.04713 | 1.102 |
| GUSB   | glucuronidase<br>beta(GUSB)                                  | NM_0001<br>81    | 454.5  | 489.2  | 0.04715 | 1.158 |
| HMG3   | high mobility group<br>nucleosomal binding<br>domain 3(HMG3) | NM_0042<br>42    | 1643.4 | 877.1  | 0.04716 | 0.603 |

|        |                                                                         |              |         |         |         |       |
|--------|-------------------------------------------------------------------------|--------------|---------|---------|---------|-------|
| HMG2   | high mobility group nucleosomal binding domain 2(HMG2)                  | NM_005517    | 177.1   | 154.4   | 0.04716 | 0.603 |
| AMACR  | alpha-methylacyl-CoA racemase(AMACR)                                    | NM_203382    | 168.3   | 125.4   | 0.04725 | 0.726 |
| SPOPL  | speckle type BTB/POZ protein like(SPOPL)                                | NM_001001664 | 148.1   | 127.6   | 0.04729 | 0.849 |
|        |                                                                         | XM_001719439 | 302.5   | 194.1   | 0.04737 | 0.638 |
|        |                                                                         | XR_039723    | 346     | 218.3   | 0.04738 | 0.652 |
| CDC123 | cell division cycle 123(CDC123)                                         | NM_006023    | 126.8   | 148.1   | 0.04739 | 1.139 |
| ZNF600 | zinc finger protein 600(ZNF600)                                         | NM_198457    | 243.7   | 303.9   | 0.04742 | 1.353 |
| PIGO   | phosphatidylinositol glycan anchor biosynthesis class O(PIGO)           | NM_152850    | 207.2   | 251.3   | 0.04745 | 1.247 |
| WBP11  | WW domain binding protein 11(WBP11)                                     | NM_016312    | 436.2   | 358.1   | 0.04749 | 0.867 |
| PDCD7  | programmed cell death 7(PDCD7)                                          | NM_005707    | 333.5   | 266.3   | 0.04761 | 0.828 |
| PDCD7  | programmed cell death 7(PDCD7)                                          | NM_005707    | 24825.1 | 30661.9 | 0.04761 | 0.828 |
| TRPV5  | transient receptor potential cation channel subfamily V member 5(TRPV5) | NM_019841    | 189.7   | 224.8   | 0.04764 | 1.241 |
| tfc2   | transcription factor CP2(TFCP2)                                         | NM_005653    | 206.7   | 170.4   | 0.0477  | 0.837 |



|             |                                                            |                  |        |        |         |       |
|-------------|------------------------------------------------------------|------------------|--------|--------|---------|-------|
|             |                                                            | XM_94481         |        |        |         |       |
|             |                                                            | 3                | 121.3  | 138.3  | 0.04772 | 1.084 |
|             |                                                            | XM_94320         |        |        |         |       |
|             |                                                            | 8                | 145.5  | 159.1  | 0.04772 | 1.081 |
| SH2D1A      | SH2 domain containing<br>1A(SH2D1A)                        | NM_0023<br>51    | 120.3  | 114.5  | 0.04772 | 0.895 |
| YPEL2       | yippee like 2(YPEL2)                                       | NM_0010<br>05404 | 160    | 141.3  | 0.04795 | 0.867 |
| GET4        | golgi to ER traffic protein<br>4(GET4)                     | NM_0159<br>49    | 102.4  | 126.3  | 0.04797 | 1.171 |
| RPS7        | ribosomal protein<br>S7(RPS7)                              | NM_0010<br>11    | 145.4  | 127.6  | 0.04804 | 0.852 |
| RPS7        | ribosomal protein<br>S7(RPS7)                              | NM_0010<br>11    | 194.3  | 202.8  | 0.04804 | 0.852 |
|             |                                                            | XM_00172         |        |        |         |       |
|             |                                                            | 2060             | 1000.1 | 1216.9 | 0.04813 | 1.363 |
| CCNG2       | cyclin G2(CCNG2)                                           | NM_0043<br>54    | 125    | 116.1  | 0.04814 | 0.678 |
| CCNH        | cyclin H(CCNH)                                             | NM_0012<br>39    | 226.2  | 154.9  | 0.04814 | 0.678 |
| RPS8        | ribosomal protein<br>S8(RPS8)                              | NM_0010<br>12    | 1470.6 | 725    | 0.04814 | 0.592 |
|             |                                                            | XM_00171         |        |        |         |       |
|             |                                                            | 5097             | 129.9  | 149.6  | 0.04821 | 1.136 |
| HNRNP<br>AB | heterogeneous nuclear<br>ribonucleoprotein<br>A/B(HNRNPAB) | NM_0044<br>99    | 146.7  | 132    | 0.04826 | 0.877 |
| SNRPF       | small nuclear<br>ribonucleoprotein<br>polypeptide F(SNRPF) | NM_0030<br>95    | 641.8  | 423.4  | 0.04829 | 0.681 |

|        |                                                      |           |        |        |         |       |           |       |      |
|--------|------------------------------------------------------|-----------|--------|--------|---------|-------|-----------|-------|------|
| SNRPF  | small nuclear ribonucleoprotein polypeptide F(SNRPF) | NM_003095 | 1328.4 | 906.8  | 0.04829 | 0.681 |           |       |      |
| DSC3   | desmocollin 3(DSC3)                                  | NM_024423 | 111.2  | 182.1  | 0.04845 | 1.811 |           |       |      |
| TMEM54 | transmembrane protein 54(TMEM54)                     | NM_033504 | 145.8  | 179.7  | 0.04849 | 1.251 |           |       |      |
| CDK7   | cyclin dependent kinase 7(CDK7)                      | NM_001799 | 719.1  | 859.7  | 0.04854 | 1.352 |           |       |      |
| SGSM2  | small G protein signaling modulator 2(SGSM2)         | NM_014853 | 912.5  | 950.8  | 0.04855 | 1.16  |           |       |      |
|        |                                                      | XM_939709 | 186    | 214.1  | 0.04856 | 1.229 |           |       |      |
| ERAP2  | endoplasmic reticulum aminopeptidase 2(ERAP2)        | NM_022350 | 206.1  | 179.1  | 0.0487  | 1.453 |           |       |      |
| ERBB2  | erb-b2 receptor tyrosine kinase 2(ERBB2)             | NM_004448 | 5897.6 | 7862.8 | 0.0487  | 1.453 |           |       |      |
|        |                                                      | DB336496  | 165.9  | 196.3  | 0.04875 | 1.22  |           |       |      |
| NOC4L  | nucleolar complex associated 4 homolog(NOC4L)        | NM_024078 | 117.2  | 136.9  | 0.04876 | 1.124 |           |       |      |
| NOC4L  | nucleolar complex associated 4 homolog(NOC4L)        | NM_024078 | 177.9  | 206.1  | 0.04876 | 1.124 | NM_031012 | 19.39 | 0.85 |
|        |                                                      | XR_039555 | 179.2  | 126.1  | 0.04876 | 0.683 |           |       |      |
| RPL23  | ribosomal protein L23(RPL23)                         | NM_000978 | 5124.5 | 3196.8 | 0.04884 | 0.747 |           |       |      |

|        |                                                                          |              |        |        |         |       |           |             |
|--------|--------------------------------------------------------------------------|--------------|--------|--------|---------|-------|-----------|-------------|
| ACTL6A | actin like 6A(ACTL6A)                                                    | NM_004301    | 1214.3 | 784.4  | 0.04888 | 0.684 |           |             |
| OSTC   | oligosaccharyltransferase complex non-catalytic subunit(OSTC)            | NM_021227    | 199.2  | 178.3  | 0.04891 | 0.751 | NM_012904 | 10.16 55.22 |
| OSTC   | oligosaccharyltransferase complex non-catalytic subunit(OSTC)            | NM_021227    | 757.8  | 544.9  | 0.04891 | 0.751 |           |             |
| BAIAP2 | BAI1 associated protein 2(BAIAP2)                                        | NM_006340    | 127.9  | 121.8  | 0.04894 | 0.918 |           |             |
| CRHR1  | corticotropin releasing hormone receptor 1(CRHR1)                        | NM_004382    | 99.8   | 151.5  | 0.04895 | 1.552 |           |             |
|        |                                                                          | AI738931     | 137.8  | 172.3  | 0.04898 | 1.258 |           |             |
| MBLAC2 | metallo-beta-lactamase domain containing 2(MBLAC2)                       | NM_203406    | 127.6  | 120.1  | 0.04907 | 0.915 |           |             |
| LSM5   | LSM5 homolog, U6 small nuclear RNA and mRNA degradation associated(LSM5) | NM_012322    | 177.6  | 142.4  | 0.04934 | 0.796 |           |             |
| LSM7   | LSM7 homolog, U6 small nuclear RNA and mRNA degradation associated(LSM7) | NM_016199    | 566.5  | 466.3  | 0.04934 | 0.796 |           |             |
| rps15a | ribosomal protein S15a(RPS15A)                                           | NM_001019    | 182.9  | 136.5  | 0.04938 | 0.741 |           |             |
| rps15a | ribosomal protein S15a(RPS15A)                                           | NM_001019    | 1616   | 913.9  | 0.04938 | 0.741 |           |             |
| RPS14  | ribosomal protein S14(RPS14)                                             | NM_001025070 | 8805.8 | 5307.3 | 0.04948 | 0.725 |           |             |

|        |                                                       |          |       |       |         |       |        |       |      |
|--------|-------------------------------------------------------|----------|-------|-------|---------|-------|--------|-------|------|
|        |                                                       | XM_00172 |       |       |         |       |        |       |      |
|        |                                                       | 4343     | 839.5 | 430.9 | 0.04948 | 0.571 |        |       |      |
|        |                                                       | XM_92846 |       |       |         |       | NM_012 |       |      |
|        |                                                       | 4        | 435.7 | 340.4 | 0.0495  | 0.831 | 823    | 17.52 | 0.04 |
|        |                                                       | XR_03893 |       |       |         |       |        |       |      |
|        |                                                       | 7        | 954.2 | 614.2 | 0.04961 | 0.694 |        |       |      |
| DRD3   | dopamine receptor D3(DRD3)                            | NM_0007  |       |       |         |       |        |       |      |
|        |                                                       | 96       | 113.3 | 125.7 | 0.04964 | 0.895 |        |       |      |
|        | developmentally regulated GTP binding protein 1(DRG1) | NM_0041  |       |       |         |       |        |       |      |
| DRG1   |                                                       | 47       | 146.9 | 133.5 | 0.04964 | 0.895 |        |       |      |
|        |                                                       | XR_03841 |       |       |         |       |        |       |      |
|        |                                                       | 0        | 135.6 | 120.5 | 0.04965 | 0.866 |        |       |      |
|        | coiled-coil domain containing 53(CCDC53)              | NM_0160  |       |       |         |       |        |       |      |
| CCDC53 |                                                       | 53       | 365.4 | 244.6 | 0.04973 | 0.687 |        |       |      |
|        | tubulin folding cofactor E(TBCE)                      | NM_0010  |       |       |         |       |        |       |      |
| TBCE   |                                                       | 79515    | 415.5 | 461.1 | 0.04975 | 1.225 |        |       |      |
|        |                                                       | XR_01736 |       |       |         |       |        |       |      |
|        |                                                       | 6        | 139   | 124.6 | 0.04983 | 0.886 |        |       |      |
|        |                                                       | XM_93034 |       |       |         |       |        |       |      |
|        |                                                       | 4        | 500.6 | 383.9 | 0.04997 | 0.799 |        |       |      |
| RHBDD  | rhomboid domain containing 3(RHBDD3)                  | NM_0122  |       |       |         |       |        |       |      |
| 3      |                                                       | 65       | 207.7 | 257.5 | 0.05    | 1.319 |        |       |      |

| Gene Symbol | Gene Name | Accession No. | CON Chow Mean | CON HFHS Mean | p-val CON vs. CON Chow | Ratio CON HFHS vs. CON Chow | REFSEQ ID | NEPHRON (MEAN RPKM) | COLLECTIN G DUCT (MEAN RPKM) |
|-------------|-----------|---------------|---------------|---------------|------------------------|-----------------------------|-----------|---------------------|------------------------------|
|             |           | XM_92751      |               |               |                        |                             |           |                     |                              |
|             |           | 1             | 115.2         | 97.2          | 0.00001                | 0.813                       |           |                     |                              |

|         |                                                                           |                  |        |       |         |       |               |                |
|---------|---------------------------------------------------------------------------|------------------|--------|-------|---------|-------|---------------|----------------|
| ADCK2   | aarF domain containing kinase 2(ADCK2)                                    | NM_0528<br>53    | 107.3  | 133.3 | 0.00016 | 1.171 |               |                |
| RPS26   | ribosomal protein S26(RPS26)                                              | NM_0010<br>29    | 89.2   | 109.3 | 0.00018 | 1.183 |               |                |
| RPS26   | ribosomal protein S26(RPS26)                                              | NM_0010<br>29    | 1360.8 | 1666  | 0.00018 | 1.183 |               |                |
| C3      | complement C3(C3)                                                         | NM_0000<br>64    | 116.5  | 99.5  | 0.00024 | 0.805 |               |                |
| SLC38A3 | solute carrier family 38 member 3(SLC38A3)                                | NM_0068<br>41    | 210.4  | 129.1 | 0.00044 | 0.564 |               |                |
|         |                                                                           | XM_37231<br>9    | 144.1  | 116.9 | 0.00046 | 0.762 |               |                |
| KLF9    | Kruppel like factor 9(KLF9)                                               | NM_0012<br>06    | 332.5  | 774.2 | 0.00046 | 1.981 |               |                |
| MTHFD2L | methylenetetrahydrofolate dehydrogenase (NADP+ dependent) 2-like(MTHFD2L) | NM_0010<br>04346 | 95.7   | 122.6 | 0.00063 | 1.219 | NM_017<br>193 | 356.13<br>8.18 |
| TSPAN1  | tetraspanin 1(TSPAN1)                                                     | NM_0057<br>27    | 96     | 132.6 | 0.00076 | 1.291 | NM_017<br>193 | 356.13<br>8.18 |
|         |                                                                           | XM_00171<br>5244 | 115.4  | 105.2 | 0.00082 | 0.864 | NM_017<br>193 | 356.13<br>8.18 |
| SNRPC   | small nuclear ribonucleoprotein polypeptide C(SNRPC)                      | NM_0030<br>93    | 237.3  | 363.8 | 0.00102 | 1.336 | NM_017<br>193 | 356.13<br>8.18 |
| SNRPC   | small nuclear ribonucleoprotein polypeptide C(SNRPC)                      | NM_0030<br>93    | 355.1  | 429.4 | 0.00102 | 1.336 |               |                |
| PHF14   | PHD finger protein 14(PHF14)                                              | NM_0146<br>60    | 120.2  | 109.4 | 0.00107 | 0.883 |               |                |

|              |                                                                    |                  |        |       |         |       |
|--------------|--------------------------------------------------------------------|------------------|--------|-------|---------|-------|
|              |                                                                    | XM_00172<br>3369 | 125.5  | 110.8 | 0.00135 | 0.85  |
| ATP6V0<br>E2 | ATPase H+ transporting<br>V0 subunit<br>e2(ATP6V0E2)               | NM_1452<br>30    | 1451.1 | 1696  | 0.00139 | 1.281 |
| ATP6V0<br>E1 | ATPase H+ transporting<br>V0 subunit<br>e1(ATP6V0E1)               | NM_0039<br>45    | 625.7  | 926.7 | 0.00139 | 1.281 |
| UGGT2        | UDP-glucose<br>glycoprotein<br>glucosyltransferase<br>2(UGGT2)     | NM_0201<br>21    | 135.8  | 193.7 | 0.00139 | 1.276 |
| EFNB2        | ephrin B2(EFNB2)                                                   | NM_0040<br>93    | 99.5   | 121   | 0.00143 | 1.17  |
| IRF2BP2      | interferon regulatory<br>factor 2 binding protein<br>2(IRF2BP2)    | NM_1829<br>72    | 165.2  | 239.2 | 0.00163 | 1.302 |
| IRF2BPL      | interferon regulatory<br>factor 2 binding protein<br>like(IRF2BPL) | NM_0244<br>96    | 218.4  | 267.1 | 0.00163 | 1.302 |
| KCNH4        | potassium voltage-gated<br>channel subfamily H<br>member 4(KCNH4)  | NM_0122<br>85    | 108.7  | 135   | 0.002   | 1.181 |
| BZW1         | basic leucine zipper and<br>W2 domains 1(BZW1)                     | NM_0146<br>70    | 124.8  | 114.3 | 0.00206 | 0.878 |
| MYLK         | myosin light chain<br>kinase(MYLK)                                 | NM_0530<br>26    | 142.6  | 204   | 0.00209 | 1.297 |
|              |                                                                    | XM_92915<br>3    | 99.5   | 131.8 | 0.00212 | 1.246 |

|         |                                                                          |              |        |        |         |       |
|---------|--------------------------------------------------------------------------|--------------|--------|--------|---------|-------|
| ADPRHL2 | ADP-ribosylhydrolase like 2(ADPRHL2)                                     | NM_017825    | 145.2  | 133.9  | 0.00222 | 0.856 |
| SHARPN  | SHANK associated RH domain interactor(SHARPIN)                           | NM_030974    | 114.9  | 152.9  | 0.00224 | 1.261 |
|         |                                                                          | XM_933942    | 144.2  | 131.5  | 0.00226 | 0.86  |
| CDAN1   | codanin 1(CDAN1)                                                         | NM_138477    | 200.4  | 163.3  | 0.00254 | 0.732 |
| POTEE   | POTE ankyrin domain family member E(POTEE)                               | NM_001083538 | 102.3  | 133.2  | 0.00259 | 1.239 |
| C8orf59 | chromosome 8 open reading frame 59(C8orf59)                              | NM_001099672 | 268.8  | 691.5  | 0.00279 | 2.227 |
| PHF7    | PHD finger protein 7(PHF7)                                               | NM_016483    | 116.6  | 108.1  | 0.00286 | 0.891 |
| ARSB    | arylsulfatase B(ARSB)                                                    | NM_000046    | 124.2  | 109.9  | 0.00294 | 0.848 |
| ARSD    | arylsulfatase D(ARSD)                                                    | NM_001669    | 149.8  | 144.3  | 0.00294 | 0.848 |
| NEDD8   | neural precursor cell expressed, developmentally down-regulated 8(NEDD8) | NM_006156    | 265.5  | 457.3  | 0.00295 | 1.49  |
| NEDD8   | neural precursor cell expressed, developmentally down-regulated 8(NEDD8) | NM_006156    | 2116.6 | 2390.9 | 0.00295 | 1.49  |
| Amy1a   | amylase, alpha 1A (salivary)(AMY1A)                                      | NM_001008221 | 94     | 117    | 0.00296 | 1.191 |

|         |                                                                     |               |        |        |         |       |
|---------|---------------------------------------------------------------------|---------------|--------|--------|---------|-------|
| KALRN   | kalirin, RhoGEF kinase(KALRN)                                       | NM_0039<br>47 | 3577.2 | 5517.9 | 0.00297 | 1.382 |
| LRBA    | LPS responsive beige-like anchor protein(LRBA)                      | NM_0067<br>26 | 104.3  | 129.4  | 0.00298 | 1.196 |
|         |                                                                     | XM_93886<br>7 | 98.8   | 117.9  | 0.003   | 1.168 |
| LYPD6B  | LY6/PLAUR domain containing 6B(LYPD6B)                              | NM_1779<br>64 | 135.8  | 123    | 0.00306 | 0.861 |
| CES5A   | carboxylesterase 5A(CES5A)                                          | NM_1450<br>24 | 120.8  | 105    | 0.00307 | 0.818 |
|         |                                                                     | XM_94522<br>3 | 118    | 104.2  | 0.00314 | 0.851 |
| CPNE1   | copine 1(CPNE1)                                                     | NM_1529<br>31 | 96.3   | 119.8  | 0.00315 | 1.186 |
|         |                                                                     | AI082160      | 151    | 131.1  | 0.00332 | 0.818 |
| CASP6   | caspase 6(CASP6)                                                    | NM_0012<br>26 | 94.5   | 118    | 0.00333 | 1.193 |
| CASP6   | caspase 6(CASP6)                                                    | NM_0329<br>92 | 108.7  | 115.2  | 0.00333 | 1.193 |
| RSRC2   | arginine and serine rich coiled-coil 2(RSRC2)                       | NM_0230<br>12 | 127.2  | 139.8  | 0.00359 | 1.329 |
| RSRC2   | arginine and serine rich coiled-coil 2(RSRC2)                       | NM_0230<br>12 | 585.6  | 906.9  | 0.00359 | 1.329 |
| TIGD1   | tigger transposable element derived 1(TIGD1)                        | NM_1457<br>02 | 107.1  | 98.1   | 0.0036  | 0.865 |
| SLCO3A1 | solute carrier organic anion transporter family member 3A1(SLCO3A1) | NM_0132<br>72 | 98.3   | 138.1  | 0.00374 | 1.349 |



|          |                                                                     |              |       |       |         |       |
|----------|---------------------------------------------------------------------|--------------|-------|-------|---------|-------|
| SLCO3A1  | solute carrier organic anion transporter family member 3A1(SLCO3A1) | NM_013272    | 130.5 | 204.6 | 0.00374 | 1.349 |
|          |                                                                     | XM_001717918 | 126.8 | 112.3 | 0.00389 | 0.848 |
| bag4     | BCL2 associated athanogene 4(BAG4)                                  | NM_004874    | 120.2 | 107   | 0.00402 | 0.852 |
| ARMCX6   | armadillo repeat containing, X-linked 6(ARMCX6)                     | NM_019007    | 99    | 114.4 | 0.00404 | 1.292 |
| ARMT1    | acidic residue methyltransferase 1(ARMT1)                           | NM_024573    | 115.1 | 160.1 | 0.00404 | 1.292 |
|          |                                                                     | XM_927848    | 123   | 149.3 | 0.00405 | 1.158 |
| CNRIP1   | cannabinoid receptor interacting protein 1(CNRIP1)                  | NM_015463    | 96.3  | 119.1 | 0.00412 | 1.194 |
| SCARNA12 | small Cajal body-specific RNA 12(SCARNA12)                          | NR_003010    | 128   | 164   | 0.00432 | 1.201 |
|          |                                                                     | XM_933083    | 143.5 | 127.5 | 0.00439 | 0.848 |
| BPHL     | biphenyl hydrolase like(BPHL)                                       | NM_004332    | 106.6 | 95.8  | 0.00458 | 0.852 |
| MIR21    | microRNA 21(MIR21)                                                  | NR_029493    | 104   | 177.3 | 0.00469 | 1.562 |

|             |                                                                                      |                  |       |       |         |       |
|-------------|--------------------------------------------------------------------------------------|------------------|-------|-------|---------|-------|
|             | nuclear pore complex<br>interacting protein family<br>member B15(NPIP B15)           | NM_0010<br>18059 | 118.4 | 107.9 | 0.00493 | 0.86  |
| NPIP B15    |                                                                                      |                  |       |       |         |       |
| RTBDN       | retbindin(RTBDN)                                                                     | NM_0010<br>80997 | 130.6 | 122.6 | 0.00515 | 0.897 |
|             | KH RNA binding domain<br>containing, signal<br>transduction associated<br>3(KHDRBS3) | NM_0065<br>58    | 558.2 | 965.9 | 0.00558 | 1.485 |
| KHDRB<br>S3 |                                                                                      |                  |       |       |         |       |
| ODF3L2      | outer dense fiber of<br>sperm tails 3 like<br>2(ODF3L2)                              | NM_1825<br>77    | 137.8 | 124   | 0.00563 | 0.854 |
| MS4A6A      | membrane spanning 4-<br>domains A6A(MS4A6A)                                          | NM_0223<br>49    | 98.3  | 118.2 | 0.00567 | 1.16  |
| VRK3        | vaccinia related kinase<br>3(VRK3)                                                   | NM_0010<br>25778 | 106.9 | 104.7 | 0.00571 | 0.867 |
| VRK3        | vaccinia related kinase<br>3(VRK3)                                                   | NM_0010<br>25778 | 167.3 | 155.2 | 0.00571 | 0.867 |
| NFX1        | nuclear transcription<br>factor, X-box binding<br>1(NFX1)                            | NM_1471<br>33    | 121.5 | 116.9 | 0.00592 | 0.866 |
| NFX1        | nuclear transcription<br>factor, X-box binding<br>1(NFX1)                            | NM_1471<br>33    | 181.8 | 169   | 0.00592 | 0.866 |
|             |                                                                                      | AV649055         | 126.1 | 113.6 | 0.00593 | 0.854 |
| SON         | SON DNA binding<br>protein(SON)                                                      | NM_1389<br>27    | 119.6 | 153.9 | 0.00594 | 1.189 |
| SON         | SON DNA binding<br>protein(SON)                                                      | NM_1389<br>27    | 171.9 | 234   | 0.00594 | 1.189 |

|         |                                                        |                  |        |        |         |       |                  |       |       |
|---------|--------------------------------------------------------|------------------|--------|--------|---------|-------|------------------|-------|-------|
| SON     | SON DNA binding protein(SON)                           | NM_1389<br>27    | 1267.9 | 1431.2 | 0.00594 | 1.189 | NM_053<br>502    | 4.02  | 18.01 |
| CLDN14  | claudin 14(CLDN14)                                     | NM_0121<br>30    | 124.8  | 393.1  | 0.00605 | 2.736 | NM_053<br>502    | 4.02  | 18.01 |
| CHRNA6  | cholinergic receptor nicotinic alpha 6 subunit(CHRNA6) | NM_0041<br>98    | 116.5  | 103.1  | 0.00626 | 0.82  | NM_053<br>502    | 4.02  | 18.01 |
| BCLAF1  | BCL2 associated transcription factor 1(BCLAF1)         | NM_0010<br>77440 | 107.8  | 128.6  | 0.00629 | 1.504 | NM_053<br>502    | 4.02  | 18.01 |
| BCO1    | beta-carotene oxygenase 1(BCO1)                        | NM_0174<br>29    | 556.2  | 960.4  | 0.00629 | 1.504 |                  |       |       |
| dnase2  | deoxyribonuclease 2, lysosomal(DNASE2)                 | NM_0013<br>75    | 107.8  | 132.5  | 0.00635 | 1.163 |                  |       |       |
| ZFP36L1 | ZFP36 ring finger protein like 1(ZFP36L1)              | NM_0049<br>26    | 802.6  | 1633.2 | 0.00639 | 1.854 |                  |       |       |
|         |                                                        | XM_93177<br>5    | 134.4  | 125.6  | 0.00661 | 0.887 |                  |       |       |
| TICAM1  | toll like receptor adaptor molecule 1(TICAM1)          | NM_1829<br>19    | 94.4   | 122.5  | 0.00681 | 1.255 |                  |       |       |
| TICAM1  | toll like receptor adaptor molecule 1(TICAM1)          | NM_1829<br>19    | 114.1  | 118.3  | 0.00681 | 1.255 |                  |       |       |
| RUNDC1  | RUN domain containing 1(RUNDC1)                        | AW27466<br>9     | 124.3  | 110.5  | 0.00689 | 0.861 | NM_001<br>009670 | 33.30 | 2.04  |
|         |                                                        | NM_1730<br>79    | 97.3   | 127.8  | 0.00692 | 1.262 |                  |       |       |
| MLPH    | melanophilin(MLPH)                                     | NM_0010<br>42467 | 128.6  | 115.1  | 0.00698 | 0.861 |                  |       |       |

|         |                          |          |       |       |         |       |
|---------|--------------------------|----------|-------|-------|---------|-------|
|         |                          | XR_00143 |       |       |         |       |
|         |                          | 4        | 123.5 | 114.5 | 0.00698 | 0.88  |
|         | uncharacterized          |          |       |       |         |       |
| LOC100  | LOC100190986(LOC10       | NR_02445 |       |       |         |       |
| 190986  | 0190986)                 | 6        | 123.5 | 109   | 0.00701 | 0.852 |
| BRIX1   | BRX1, biogenesis of      | NM_0183  |       |       |         |       |
|         | ribosomes(BRIX1)         | 21       | 121.9 | 109.5 | 0.00741 | 0.871 |
| ALG13   | ALG13, UDP-N-            | NM_0184  |       |       |         |       |
|         | acetylglucosaminyltransf | 66       | 131   | 121.9 | 0.00742 | 0.874 |
|         | erase subunit(ALG13)     |          |       |       |         |       |
| KLF7    | Kruppel like factor      | NM_0037  |       |       |         |       |
|         | 7(KLF7)                  | 09       | 159.5 | 275.6 | 0.00745 | 1.504 |
| ankrd40 | ankyrin repeat domain    | NM_0528  |       |       |         |       |
|         | 40(ANKRD40)              | 55       | 114.4 | 199.7 | 0.00753 | 1.599 |
| OGFOD1  | 2-oxoglutarate and iron  | NM_0182  |       |       |         |       |
|         | dependent oxygenase      | 33       | 99.3  | 130   | 0.00761 | 1.228 |
|         | domain containing        |          |       |       |         |       |
| OGFOD1  | 1(OGFOD1)                | NM_0182  |       |       |         |       |
|         | 2-oxoglutarate and iron  | 33       | 108.8 | 120.6 | 0.00761 | 1.228 |
|         | dependent oxygenase      |          |       |       |         |       |
|         | domain containing        |          |       |       |         |       |
| ACYP1   | acylphosphatase          | NM_0011  |       |       |         |       |
|         | 1(ACYP1)                 | 07       | 147.2 | 120.3 | 0.00766 | 0.776 |
| ATCAY   | ATCAY,                   | XM_00172 |       |       |         |       |
|         | caytaxin(ATCAY)          | 3164     | 130.4 | 153.2 | 0.00769 | 1.108 |
|         | WD repeat and FYVE       | NM_0330  |       |       |         |       |
|         | domain containing        | 64       | 110.4 | 135.2 | 0.00773 | 1.172 |
| WDFY3   | 3(WDFY3)                 | NM_1785  |       |       |         |       |
|         |                          | 83       | 113.6 | 103.2 | 0.00775 | 0.856 |

|        |                                                                     |              |       |       |         |       |
|--------|---------------------------------------------------------------------|--------------|-------|-------|---------|-------|
|        |                                                                     | XR_03819     |       |       |         |       |
|        |                                                                     | 5            | 115.5 | 105.7 | 0.00799 | 0.883 |
| DNMT3L | DNA methyltransferase 3 like(DNMT3L)                                | NM_013369    | 135.1 | 124.2 | 0.00805 | 0.868 |
| DNMT3B | DNA methyltransferase 3 beta(DNMT3B)                                | NM_006892    | 100.9 | 100.9 | 0.00805 | 0.868 |
| OPRM1  | opioid receptor mu 1(OPRM1)                                         | NM_001008505 | 109   | 127.7 | 0.00808 | 1.105 |
| OPRM1  | opioid receptor mu 1(OPRM1)                                         | NM_001008505 | 178.1 | 175   | 0.00808 | 1.105 |
| ADIPOQ | adiponectin, C1Q and collagen domain containing(ADIPOQ)             | NM_004797    | 91.8  | 113.8 | 0.00808 | 1.184 |
| CACNB1 | calcium voltage-gated channel auxiliary subunit beta 1(CACNB1)      | NM_199247    | 123   | 112.6 | 0.00821 | 0.888 |
| ENTPD6 | ectonucleoside triphosphate diphosphohydrolase 6 (putative)(ENTPD6) | NM_001247    | 86.8  | 106.3 | 0.00831 | 1.194 |
| ENTPD7 | ectonucleoside triphosphate diphosphohydrolase 7(ENTPD7)            | NM_020354    | 101.7 | 105.3 | 0.00831 | 1.194 |
| rab41  | RAB41, member RAS oncogene family(RAB41)                            | NM_001032726 | 159.4 | 138.4 | 0.00832 | 0.823 |
| FAM83F | family with sequence similarity 83 member F(FAM83F)                 | NM_138435    | 124.2 | 103.8 | 0.00838 | 0.795 |

|        |                                                                         |                  |       |       |         |       |
|--------|-------------------------------------------------------------------------|------------------|-------|-------|---------|-------|
| PGA3   | pepsinogen 3, group I<br>(pepsinogen A)(PGA3)                           | NM_0010<br>79807 | 90.1  | 96.1  | 0.00851 | 0.845 |
| PGA3   | pepsinogen 3, group I<br>(pepsinogen A)(PGA3)                           | NM_0010<br>79807 | 113.2 | 103.8 | 0.00851 | 0.845 |
| PGA3   | pepsinogen 3, group I<br>(pepsinogen A)(PGA3)                           | NM_0010<br>79807 | 130.2 | 116.3 | 0.00851 | 0.845 |
| SNX13  | sorting nexin 13(SNX13)                                                 | NM_0151<br>32    | 124   | 166.1 | 0.00852 | 1.259 |
| TDGP1  | thymine-DNA<br>glycosylase<br>pseudogene 1(TDGP1)                       | NR_02438<br>2    | 94.7  | 117.4 | 0.00859 | 1.164 |
| CCT5   | chaperonin containing<br>TCP1 subunit 5(CCT5)                           | NM_0120<br>73    | 453.4 | 761.3 | 0.00873 | 1.48  |
| PRAM1  | PML-RARA regulated<br>adaptor molecule<br>1(PRAM1)                      | NM_0321<br>52    | 117.5 | 111   | 0.00876 | 0.897 |
| SDIM1  | stress responsive<br>DNAJB4 interacting<br>membrane protein<br>1(SDIM1) | AK129633         | 111.7 | 100.4 | 0.00883 | 0.846 |
| RHBDL1 | rhomboid like<br>1(RHBDL1)                                              | NM_0039<br>61    | 125.4 | 110.9 | 0.00884 | 0.858 |
| RBM48  | RNA binding motif<br>protein 48(RBM48)                                  | NM_0321<br>20    | 111.5 | 147.3 | 0.00888 | 1.228 |
| RBM48  | RNA binding motif<br>protein 48(RBM48)                                  | NM_0321<br>20    | 113.2 | 123.3 | 0.00888 | 1.228 |
| PBXIP1 | PBX homeobox<br>interacting protein<br>1(PBXIP1)                        | NM_0205<br>24    | 161.6 | 143.6 | 0.00892 | 0.842 |
|        |                                                                         | NM_0010<br>04302 | 103.3 | 131.4 | 0.00904 | 1.218 |

|         |                                                       |          |       |       |         |       |
|---------|-------------------------------------------------------|----------|-------|-------|---------|-------|
|         |                                                       | XM_00112 |       |       |         |       |
|         |                                                       | 6650     | 93.7  | 111.4 | 0.00908 | 1.155 |
| LMBRD1  | LMBR1 domain containing 1(LMBRD1)                     | NM_0183  |       |       |         |       |
|         |                                                       | 68       | 147.4 | 118.6 | 0.00911 | 0.755 |
|         |                                                       | XR_01907 |       |       |         |       |
|         |                                                       | 6        | 93.7  | 108.9 | 0.0092  | 1.124 |
|         |                                                       | AI351498 | 120.3 | 109.6 | 0.00935 | 0.879 |
| TRIM3   | tripartite motif containing 3(TRIM3)                  | NM_0064  |       |       |         |       |
|         |                                                       | 58       | 150.2 | 141.6 | 0.0094  | 0.809 |
| TRIM3   | tripartite motif containing 3(TRIM3)                  | NM_0064  |       |       |         |       |
|         |                                                       | 58       | 207.4 | 183.2 | 0.0094  | 0.809 |
|         |                                                       | XM_00113 |       |       |         |       |
|         |                                                       | 1286     | 127.8 | 120.4 | 0.00948 | 0.887 |
|         |                                                       | BG951912 | 120.2 | 108.2 | 0.0095  | 0.873 |
| ALX3    | ALX homeobox 3(ALX3)                                  | NM_0064  |       |       |         |       |
|         |                                                       | 92       | 116.8 | 226.2 | 0.00957 | 1.705 |
| ALX1    | ALX homeobox 1(ALX1)                                  | NM_0069  |       |       |         |       |
|         |                                                       | 82       | 91.2  | 242.9 | 0.00957 | 1.705 |
| TUBA3FP | tubulin alpha 3f pseudogene(TUBA3FP)                  | NR_00360 |       |       |         |       |
|         |                                                       | 8        | 118.3 | 110.9 | 0.00964 | 0.896 |
| TSNAX   | translin associated factor X(TSNAX)                   | NM_0059  |       |       |         |       |
|         |                                                       | 99       | 167.6 | 278.8 | 0.00969 | 1.43  |
|         |                                                       | XM_94166 |       |       |         |       |
|         |                                                       | 5        | 377.1 | 707.9 | 0.00979 | 1.679 |
| TAGLN   | transgelin(TAGLN) family with sequence                | NM_0010  |       |       |         |       |
|         |                                                       | 01522    | 126.5 | 115   | 0.00986 | 0.86  |
| FAM193A | family with sequence similarity 193 member A(FAM193A) | NM_0037  |       |       |         |       |
|         |                                                       | 04       | 246   | 398.6 | 0.00989 | 1.403 |

|              |                                                                                      |                  |       |       |         |       |
|--------------|--------------------------------------------------------------------------------------|------------------|-------|-------|---------|-------|
| RNF146       | ring finger protein<br>146(RNF146)                                                   | NM_0309<br>63    | 99.4  | 102.1 | 0.00991 | 1.355 |
| RNF146       | ring finger protein<br>146(RNF146)                                                   | NM_0309<br>63    | 122.5 | 189.7 | 0.00991 | 1.355 |
|              |                                                                                      | BX105500         | 111.7 | 98.4  | 0.00991 | 0.852 |
| PCYOX1<br>L  | prenylcysteine oxidase<br>1 like(PCYOX1L)                                            | NM_0240<br>28    | 100.8 | 119.2 | 0.00991 | 1.136 |
| SQLE         | squalene<br>epoxidase(SQLE)                                                          | NM_0031<br>29    | 103   | 141.6 | 0.00998 | 1.296 |
| SQLE         | squalene<br>epoxidase(SQLE)                                                          | NM_0031<br>29    | 105   | 115.6 | 0.00998 | 1.296 |
|              |                                                                                      | CR593338         | 122.9 | 114.7 | 0.00999 | 0.873 |
| KDM4B        | lysine demethylase<br>4B(KDM4B)                                                      | NM_0150<br>15    | 333.1 | 517.7 | 0.01009 | 1.343 |
| UBE2DN<br>L  | ubiquitin conjugating<br>enzyme E2 D N-terminal<br>like<br>(pseudogene)(UBE2DN<br>L) | NR_02406<br>2    | 105.1 | 95.2  | 0.01014 | 0.861 |
| C11orf5<br>8 | chromosome 11 open<br>reading frame<br>58(C11orf58)                                  | NM_0011<br>42705 | 191.7 | 170.1 | 0.01023 | 0.818 |
| PRKAR2<br>A  | protein kinase cAMP-<br>dependent type II<br>regulatory subunit<br>alpha(PRKAR2A)    | NM_0041<br>57    | 98.8  | 121.2 | 0.01026 | 1.171 |
| DNAJC1<br>0  | DnaJ heat shock protein<br>family (Hsp40) member<br>C10(DNAJC10)                     | NM_0189<br>81    | 102.7 | 114.7 | 0.01029 | 1.362 |



|             |                                                                       |                  |        |        |         |       |                  |                |
|-------------|-----------------------------------------------------------------------|------------------|--------|--------|---------|-------|------------------|----------------|
| DNAJC1<br>1 | DnaJ heat shock protein<br>family (Hsp40) member<br>C11(DNAJC11)      | NM_0181<br>98    | 514.6  | 812.9  | 0.01029 | 1.362 |                  |                |
| DNAH6       | dynein axonemal heavy<br>chain 6(DNAH6)                               | AB051484         | 149.9  | 117.8  | 0.01039 | 0.756 |                  |                |
| RHEB        | Ras homolog enriched<br>in brain(RHEB)                                | NM_0056<br>14    | 256    | 358.2  | 0.01042 | 1.225 |                  |                |
| DHX15       | DEAH-box helicase<br>15(DHX15)                                        | NM_0013<br>58    | 230    | 328    | 0.01045 | 1.632 |                  |                |
| DHX16       | DEAH-box helicase<br>16(DHX16)                                        | NM_0035<br>87    | 752.7  | 1388.1 | 0.01045 | 1.632 |                  |                |
|             |                                                                       | XM_00112<br>6824 | 150.6  | 135.5  | 0.01048 | 0.85  |                  |                |
|             |                                                                       | XM_00171<br>6052 | 110.8  | 100.1  | 0.01052 | 0.87  |                  |                |
| AMY1B       | amylase, alpha 1B<br>(salivary)(AMY1B)                                | NM_0010<br>08218 | 112.2  | 120.4  | 0.01056 | 1.624 |                  |                |
| AMY1C       | amylase, alpha 1C<br>(salivary)(AMY1C)                                | NM_0010<br>08219 | 1317.4 | 2434.2 | 0.01056 | 1.624 |                  |                |
| TMEM12<br>3 | transmembrane protein<br>123(TMEM123)                                 | NM_0529<br>32    | 418.7  | 722.5  | 0.01061 | 1.498 | NM_001<br>107943 | 0.63<br>112.77 |
| LEO1        | LEO1 homolog,<br>Paf1/RNA polymerase II<br>complex<br>component(LEO1) | NM_1387<br>92    | 107.1  | 125    | 0.01068 | 1.12  |                  |                |
| QKI         | QKI, KH domain<br>containing RNA<br>binding(QKI)                      | NM_0067<br>75    | 96.4   | 119.5  | 0.01078 | 1.165 |                  |                |

|         |                                                   |              |       |        |         |       |
|---------|---------------------------------------------------|--------------|-------|--------|---------|-------|
| QKI     | QKI, KH domain containing RNA binding(QKI)        | NM_006775    | 105.3 | 119.9  | 0.01078 | 1.165 |
|         |                                                   | XM_937684    | 132.4 | 125.1  | 0.01083 | 0.894 |
| MIR33B  | microRNA 33b(MIR33B)                              | NR_030361    | 88.7  | 105.8  | 0.01083 | 1.168 |
| HNRNP K | heterogeneous nuclear ribonucleoprotein K(HNRNPK) | NM_031263    | 184.4 | 274.4  | 0.01088 | 1.348 |
| HNRNP K | heterogeneous nuclear ribonucleoprotein K(HNRNPK) | NM_031263    | 825.9 | 1283.7 | 0.01088 | 1.348 |
| HNRNP K | heterogeneous nuclear ribonucleoprotein K(HNRNPK) | NM_031263    | 988.8 | 1505.9 | 0.01088 | 1.348 |
|         |                                                   | XM_001716310 | 107   | 100.3  | 0.01118 | 0.89  |
|         |                                                   | XM_936314    | 127.8 | 114.9  | 0.01119 | 0.86  |
| FBXW5   | F-box and WD repeat domain containing 5(FBXW5)    | NM_178226    | 251.7 | 240.3  | 0.01125 | 0.839 |
|         |                                                   | XM_496269    | 99.6  | 121.5  | 0.01127 | 1.159 |
| GSTM1   | glutathione S-transferase mu 1(GSTM1)             | NM_000561    | 98.9  | 115.8  | 0.01133 | 1.126 |

|             |                                                              |                  |       |       |         |       |        |       |      |
|-------------|--------------------------------------------------------------|------------------|-------|-------|---------|-------|--------|-------|------|
|             | ADAM metallopeptidase<br>with thrombospondin<br>type 1 motif | NM_1979          |       |       |         |       | NM_134 |       |      |
| ADAMTS<br>6 | 6(ADAMTS6)                                                   | 41               | 170.6 | 291.4 | 0.01137 | 1.484 | 372    | 22.51 | 0.03 |
|             | formin homology 2<br>domain containing                       | NM_0132          |       |       |         |       |        |       |      |
| FHOD1       | 1(FHOD1)                                                     | 41               | 296.4 | 997   | 0.01144 | 2.926 |        |       |      |
|             |                                                              | XM_00171<br>5275 | 115   | 106.1 | 0.01146 | 0.877 |        |       |      |
|             |                                                              | XM_93467<br>2    | 106.9 | 102.5 | 0.01155 | 0.918 |        |       |      |
|             | cytochrome P450 family<br>39 subfamily A member              | NM_0165          |       |       |         |       |        |       |      |
| CYP39A<br>1 | 1(CYP39A1)                                                   | 93               | 134.6 | 121   | 0.01157 | 0.858 |        |       |      |
|             | hydroxysteroid 17-beta<br>dehydrogenase                      | NM_0004          |       |       |         |       |        |       |      |
| HSD17B<br>4 | 4(HSD17B4)                                                   | 14               | 97.4  | 225.8 | 0.01161 | 2.07  |        |       |      |
|             | methylsterol<br>monooxygenase                                | NM_0010          |       |       |         |       |        |       |      |
| MSMO1       | 1(MSMO1)                                                     | 17369            | 104.2 | 119.7 | 0.01162 | 1.113 |        |       |      |
|             | methylsterol<br>monooxygenase                                | NM_0010          |       |       |         |       |        |       |      |
| MSMO1       | 1(MSMO1)                                                     | 17369            | 204.8 | 217.2 | 0.01162 | 1.113 |        |       |      |
|             | RNA binding protein<br>with multiple<br>splicing             | NM_0010          |       |       |         |       |        |       |      |
| RBPMS       | (RBPMS)                                                      | 08710            | 109.3 | 149.7 | 0.01162 | 1.274 |        |       |      |
|             | pleckstrin homology like<br>domain family A                  | NM_0073          |       |       |         |       |        |       |      |
| PHLDA1      | member 1(PHLDA1)                                             | 50               | 110.5 | 108.7 | 0.01165 | 1.361 |        |       |      |
|             | pleckstrin homology like<br>domain family A                  | NM_0073          |       |       |         |       |        |       |      |
| PHLDA1      | member 1(PHLDA1)                                             | 50               | 186.5 | 293   | 0.01165 | 1.361 |        |       |      |

|             |                                                                                                |                  |       |       |         |       |
|-------------|------------------------------------------------------------------------------------------------|------------------|-------|-------|---------|-------|
| ZFHx4       | zinc finger homeobox<br>4(ZFHx4)                                                               | NM_0247<br>21    | 80.5  | 98.4  | 0.01169 | 1.213 |
| rbm12       | RNA binding motif<br>protein 12(RBM12)                                                         | NM_0060<br>47    | 121.2 | 152.4 | 0.0118  | 1.177 |
| rbm12       | RNA binding motif<br>protein 12(RBM12)                                                         | NM_0060<br>47    | 138.8 | 179.8 | 0.0118  | 1.177 |
|             |                                                                                                | DB336481         | 136.1 | 128.4 | 0.0118  | 0.882 |
| HSD3B2      | hydroxy-delta-5-steroid<br>dehydrogenase, 3 beta-<br>and steroid delta-<br>isomerase 2(HSD3B2) | NM_0001<br>98    | 98.5  | 113.7 | 0.01189 | 1.111 |
| CCDC87      | coiled-coil domain<br>containing 87(CCDC87)                                                    | NM_0182<br>19    | 116.5 | 102.2 | 0.01196 | 0.848 |
| SLC35A<br>2 | solute carrier family 35<br>member A2(SLC35A2)                                                 | NM_0010<br>32289 | 109.9 | 126.1 | 0.01206 | 1.094 |
| SLC35A<br>2 | solute carrier family 35<br>member A2(SLC35A2)                                                 | NM_0010<br>32289 | 345.8 | 386   | 0.01206 | 1.094 |
|             |                                                                                                | AW04461<br>5     | 120.4 | 110.6 | 0.01257 | 0.877 |
|             |                                                                                                | XM_00172<br>0423 | 149.9 | 130   | 0.01262 | 0.833 |
| Snora41     | small nucleolar RNA,<br>H/ACA box<br>41(SNORA41)                                               | NR_00259<br>0    | 109.5 | 143.7 | 0.01267 | 1.264 |
| RBFOX2      | RNA binding protein, fox-<br>1 homolog 2(RBFOX2)                                               | NM_0010<br>82576 | 234.9 | 422.2 | 0.0128  | 1.554 |

|          |                                                                       |           |        |        |         |       |              |      |       |
|----------|-----------------------------------------------------------------------|-----------|--------|--------|---------|-------|--------------|------|-------|
| HTR3A    | 5-hydroxytryptamine receptor 3A(HTR3A)                                | NM_000869 | 106.4  | 96.9   | 0.01282 | 0.871 | NM_001031645 | 1.93 | 10.04 |
| HTR3A    | 5-hydroxytryptamine receptor 3A(HTR3A)                                | NM_213621 | 147.9  | 157.9  | 0.01282 | 0.871 |              |      |       |
| MATR3    | matrin 3(MATR3)                                                       | NM_199189 | 97.7   | 103.8  | 0.01297 | 1.418 |              |      |       |
| MATR3    | matrin 3(MATR3)                                                       | NM_199189 | 100.8  | 111    | 0.01297 | 1.418 |              |      |       |
| MATR3    | matrin 3(MATR3)                                                       | NM_199189 | 1659.9 | 2694.5 | 0.01297 | 1.418 |              |      |       |
| MTX1     | metaxin 1(MTX1)                                                       | NM_198883 | 171.5  | 158.1  | 0.01297 | 0.84  |              |      |       |
| MOXD1    | monooxygenase DBH like 1(MOXD1)                                       | NM_015529 | 102.9  | 168.3  | 0.01312 | 1.524 |              |      |       |
| TMEM136  | transmembrane protein 136(TMEM136)                                    | NM_174926 | 86.9   | 106.7  | 0.01314 | 1.197 |              |      |       |
| AHCTF1   | AT-hook containing transcription factor 1(AHCTF1)                     | NM_015446 | 1763.1 | 731.7  | 0.01316 | 0.351 |              |      |       |
| AP4E1    | adaptor related protein complex 4 epsilon 1 subunit(AP4E1)            | NM_007347 | 168.8  | 150.5  | 0.01317 | 0.84  |              |      |       |
| MAPKBP1  | mitogen-activated protein kinase binding protein 1(MAPKBP1)           | NM_014994 | 125.3  | 135    | 0.01326 | 1.139 |              |      |       |
| MAPKAPK5 | mitogen-activated protein kinase-activated protein kinase 5(MAPKAPK5) | NM_139078 | 91.6   | 107.7  | 0.01326 | 1.139 |              |      |       |

|         |                                                                                               |              |       |        |         |       |           |       |      |
|---------|-----------------------------------------------------------------------------------------------|--------------|-------|--------|---------|-------|-----------|-------|------|
| SF3A3   | splicing factor 3a subunit 3(SF3A3)                                                           | NM_006802    | 817.1 | 1234.5 | 0.01327 | 1.327 |           |       |      |
| IFT172  | intraflagellar transport 172(IFT172)                                                          | NM_015662    | 164.7 | 216.9  | 0.01331 | 1.2   |           |       |      |
| B3GAT1  | beta-1,3-glucuronyltransferase 1(B3GAT1)                                                      | NM_054025    | 102.7 | 124.5  | 0.01357 | 1.164 |           |       |      |
| RAC3    | ras-related C3 botulinum toxin substrate 3 (rho family, small GTP binding protein Rac3)(RAC3) | NM_005052    | 238.8 | 189.4  | 0.01379 | 0.732 | NM_144748 | 66.99 | 0.14 |
|         |                                                                                               | XM_371878    | 94.4  | 114.5  | 0.01381 | 1.173 |           |       |      |
| MSANTD4 | Myb/SANT DNA binding domain containing 4 with coiled-coils(MSANTD4)                           | NM_032424    | 171.2 | 239.6  | 0.01392 | 1.249 |           |       |      |
| SEBOX   | SEBOX homeobox(SEBOX)                                                                         | NM_001080837 | 114.6 | 106.1  | 0.01403 | 0.876 |           |       |      |
| NAPEPLD | N-acyl phosphatidylethanolamine phospholipase D(NAPEPLD)                                      | NM_198990    | 117.5 | 121.5  | 0.01417 | 1.212 |           |       |      |
| NAPEPLD | N-acyl phosphatidylethanolamine phospholipase D(NAPEPLD)                                      | NM_198990    | 151.5 | 203.1  | 0.01417 | 1.212 |           |       |      |
| CHAD    | chondroadherin(CHAD)                                                                          | NM_001267    | 100   | 122.7  | 0.01418 | 1.187 |           |       |      |

|        |                                                     |                  |       |       |         |       |                  |       |      |
|--------|-----------------------------------------------------|------------------|-------|-------|---------|-------|------------------|-------|------|
| PPIE   | peptidylprolyl isomerase E(PPIE)                    | NM_0061<br>12    | 124.6 | 165.2 | 0.01427 | 1.224 |                  |       |      |
|        |                                                     | XR_03767<br>2    | 112.5 | 135.6 | 0.01433 | 1.148 |                  |       |      |
| HAUS2  | HAUS augmin like complex subunit 2(HAUS2)           | NM_0180<br>97    | 172.6 | 247   | 0.01436 | 1.288 | NM_001<br>107793 | 77.29 | 6.85 |
| HAT1   | histone acetyltransferase 1(HAT1)                   | NM_0036<br>42    | 134.1 | 151   | 0.01436 | 1.288 | NM_001<br>107793 | 77.29 | 6.85 |
|        |                                                     | XM_93150<br>6    | 106.7 | 125.6 | 0.01442 | 1.128 | NM_001<br>107793 | 77.29 | 6.85 |
| HOXD3  | homeobox D3(HOXD3)                                  | NM_0068<br>98    | 201.9 | 444.6 | 0.0146  | 1.94  | NM_001<br>107793 | 77.29 | 6.85 |
| BTLA   | B and T lymphocyte associated(BTLA)                 | NM_1817<br>80    | 105   | 97.1  | 0.01464 | 0.878 |                  |       |      |
| FAM26D | family with sequence similarity 26 member D(FAM26D) | NM_1530<br>36    | 106.6 | 112.5 | 0.01474 | 0.902 |                  |       |      |
| FAM26F | family with sequence similarity 26 member F(FAM26F) | NM_0010<br>10919 | 121.7 | 114.9 | 0.01474 | 0.902 |                  |       |      |
| PI15   | peptidase inhibitor 15(PI15)                        | NM_0158<br>86    | 95.2  | 113.2 | 0.01484 | 1.136 |                  |       |      |
| PI15   | peptidase inhibitor 15(PI15)                        | NM_0158<br>86    | 136.8 | 127.6 | 0.01484 | 1.136 |                  |       |      |

|              |                                                                   |                  |       |       |         |       |
|--------------|-------------------------------------------------------------------|------------------|-------|-------|---------|-------|
| ELP2         | elongator<br>acetyltransferase<br>complex subunit<br>2(ELP2)      | NM_0182<br>55    | 133.4 | 268.5 | 0.01485 | 1.733 |
| ELOVL6       | ELOVL fatty acid<br>elongase 6(ELOVL6)                            | NM_0240<br>90    | 113.7 | 173.4 | 0.01485 | 1.733 |
| FNDC4        | fibronectin type III<br>domain containing<br>4(FNDC4)             | NM_0228<br>23    | 338.7 | 599.5 | 0.01487 | 1.536 |
| CAPRIN<br>2  | caprin family member<br>2(CAPRIN2)                                | NM_0239<br>25    | 160.4 | 234.6 | 0.01487 | 1.311 |
| MPHOS<br>PH6 | M-phase<br>phosphoprotein<br>6(MPHOSPH6)                          | NM_0057<br>92    | 127.5 | 164.8 | 0.01492 | 1.202 |
| CPSF4        | cleavage and<br>polyadenylation specific<br>factor 4(CPSF4)       | NM_0010<br>81559 | 152.5 | 191.1 | 0.01498 | 1.18  |
| CPSF3L       | cleavage and<br>polyadenylation specific<br>factor 3-like(CPSF3L) | NM_0178<br>71    | 97.9  | 122.7 | 0.01498 | 1.18  |
|              |                                                                   | XM_00113<br>2711 | 142.6 | 127.2 | 0.01513 | 0.848 |
| CCDC12<br>4  | coiled-coil domain<br>containing<br>124(CCDC124)                  | NM_1384<br>42    | 91.1  | 110.5 | 0.0153  | 1.189 |
| RARB         | retinoic acid receptor<br>beta(RARB)                              | NM_0009<br>65    | 122.7 | 195.1 | 0.01545 | 1.398 |
| RARB         | retinoic acid receptor<br>beta(RARB)                              | NM_0009<br>65    | 126.3 | 251.4 | 0.01545 | 1.398 |



|          |                                                                       |                                   |       |       |         |       |
|----------|-----------------------------------------------------------------------|-----------------------------------|-------|-------|---------|-------|
| MSLNL    | mesothelin-like(MSLNL)                                                | NM_0010<br>25190                  | 108.4 | 101   | 0.01554 | 0.856 |
| MSLNL    | mesothelin-like(MSLNL)                                                | NM_0010<br>25190                  | 113.5 | 102   | 0.01554 | 0.856 |
| rtf1     | RTF1 homolog,<br>Paf1/RNA polymerase II<br>complex<br>component(RTF1) | NM_0151<br>38                     | 152.7 | 142.8 | 0.01576 | 0.873 |
| FZD1     | frizzled class receptor<br>1(FZD1)                                    | NM_0035<br>05                     | 117.6 | 110.1 | 0.01589 | 0.88  |
| FZD2     | frizzled class receptor<br>2(FZD2)                                    | NM_0014<br>66                     | 251.1 | 258.2 | 0.01589 | 0.88  |
| CSNK2A1  | casein kinase 2 alpha<br>1(CSNK2A1)                                   | NM_0018<br>95                     | 125.5 | 163.4 | 0.01591 | 1.199 |
| SYTL2    | synaptotagmin like<br>2(SYTL2)                                        | NM_0329<br>43                     | 90.5  | 116.1 | 0.01595 | 1.231 |
| tmem132a | transmembrane protein<br>132A(TMEM132A)                               | NM_1780<br>31                     | 98.8  | 130.8 | 0.01611 | 1.252 |
| MORF4L2  | mortality factor 4 like<br>2(MORF4L2)                                 | NM_0122<br>86                     | 583.1 | 916.9 | 0.01613 | 1.377 |
| GDI1     | GDP dissociation<br>inhibitor 1(GDI1)                                 | NM_0010<br>04349<br>NM_0014<br>93 | 124.5 | 112.3 | 0.01613 | 0.847 |
| CDHR5    | cadherin related family<br>member 5(CDHR5)                            | NM_0219<br>24                     | 140.3 | 129.6 | 0.01617 | 0.872 |
| ZCCHC8   | zinc finger CCHC-type<br>containing 8(ZCCHC8)                         | NM_0176<br>12                     | 150   | 193.1 | 0.01618 | 1.171 |
| NOXO1    | NADPH oxidase<br>organizer 1(NOXO1)                                   | NM_1721<br>67                     | 142.3 | 115.5 | 0.01621 | 0.757 |

|         |                                                           |              |        |        |         |       |              |            |
|---------|-----------------------------------------------------------|--------------|--------|--------|---------|-------|--------------|------------|
| ORAI3   | ORAI calcium release-activated calcium modulator 3(ORAI3) | NM_152288    | 180.3  | 165.3  | 0.01627 | 0.85  |              |            |
| mgarp   | mitochondria localized glutamic acid rich protein(MGARP)  | NM_032623    | 87.5   | 107.8  | 0.01629 | 1.203 |              |            |
| mgarp   | mitochondria localized glutamic acid rich protein(MGARP)  | NM_032623    | 97.1   | 148.2  | 0.01629 | 1.203 |              |            |
| MT1X    | metallothionein 1X(MT1X)                                  | NM_005952    | 6772.5 | 2593.9 | 0.01632 | 0.32  |              |            |
| ZNF174  | zinc finger protein 174(ZNF174)                           | NM_001032292 | 108.9  | 108.1  | 0.01637 | 1.156 |              |            |
| ZNF174  | zinc finger protein 174(ZNF174)                           | NM_001032292 | 110.7  | 135.4  | 0.01637 | 1.156 | NM_001009603 | 28.32 0.90 |
| H2AFJ   | H2A histone family member J(H2AFJ)                        | NM_018267    | 111.7  | 104.7  | 0.01649 | 0.888 |              |            |
| DCAF4L1 | DDB1 and CUL4 associated factor 4 like 1(DCAF4L1)         | NM_001029955 | 99.8   | 117.6  | 0.01649 | 1.121 |              |            |
| FLYWCH1 | FLYWCH-type zinc finger 1(FLYWCH1)                        | NM_020912    | 124.4  | 112.4  | 0.01661 | 0.874 |              |            |
| LRRC46  | leucine rich repeat containing 46(LRRC46)                 | NM_033413    | 113.2  | 103.7  | 0.01672 | 0.856 |              |            |
| LRRC45  | leucine rich repeat containing 45(LRRC45)                 | NM_144999    | 110.5  | 99.2   | 0.01672 | 0.856 |              |            |
| NME3    | NME/NM23 nucleoside diphosphate kinase 3(NME3)            | NM_002513    | 1065.4 | 800.5  | 0.01674 | 0.659 |              |            |

|                  |                                                                                        |                  |        |        |         |       |
|------------------|----------------------------------------------------------------------------------------|------------------|--------|--------|---------|-------|
| LIPT1            | lipoyltransferase<br>1(LIPT1)                                                          | NM_0159<br>29    | 101.6  | 127.9  | 0.01677 | 1.198 |
| LITAF            | lipopolysaccharide<br>induced TNF<br>factor(LITAF)                                     | NM_0048<br>62    | 109    | 116.6  | 0.01677 | 1.198 |
| HM13             | histocompatibility minor<br>13(HM13)                                                   | NM_1785<br>80    | 132.4  | 145.5  | 0.01679 | 1.248 |
| HM13             | histocompatibility minor<br>13(HM13)                                                   | NM_1785<br>82    | 175    | 246.4  | 0.01679 | 1.248 |
| CCZ1             | CCZ1 homolog,<br>vacuolar protein<br>trafficking and<br>biogenesis<br>associated(CCZ1) | NM_0156<br>22    | 868.3  | 1276   | 0.01691 | 1.288 |
|                  |                                                                                        | XM_94348<br>2    | 115.3  | 107.2  | 0.01716 | 0.878 |
| ITPA             | inosine<br>triphosphatase(ITPA)                                                        | NM_0334<br>53    | 1119.3 | 1967.5 | 0.01725 | 1.573 |
| ITM2C            | integral membrane<br>protein 2C(ITM2C)                                                 | NM_0010<br>12516 | 735.9  | 1104.2 | 0.01725 | 1.573 |
| LOC105<br>378397 | uncharacterized<br>LOC105378397(LOC10<br>5378397)                                      | BX092644         | 201.8  | 162.1  | 0.01735 | 0.754 |
| CSNK1G<br>1      | casein kinase 1 gamma<br>1(CSNK1G1)                                                    | NM_0220<br>48    | 142.1  | 200.6  | 0.01737 | 1.399 |
| csnk1e           | casein kinase 1<br>epsilon(CSNK1E)                                                     | NM_1522<br>21    | 127.6  | 197.4  | 0.01737 | 1.399 |
| TSACC            | TSSK6 activating<br>cochaperone(TSACC)                                                 | NM_1446<br>27    | 106.5  | 133.2  | 0.01756 | 1.213 |
| ZNF77            | zinc finger protein<br>77(ZNF77)                                                       | NM_0212<br>17    | 108.6  | 137.3  | 0.0176  | 1.194 |

|         |                                                        |              |       |       |         |       |
|---------|--------------------------------------------------------|--------------|-------|-------|---------|-------|
| TMEM237 | transmembrane protein 237(TMEM237)                     | NM_001044385 | 145.7 | 225.7 | 0.01761 | 1.367 |
| PCM1    | pericentriolar material 1(PCM1)                        | NM_006197    | 268.7 | 361.1 | 0.01767 | 1.172 |
| PCM1    | pericentriolar material 1(PCM1)                        | NM_006197    | 382.6 | 494   | 0.01767 | 1.172 |
| GSTO1   | glutathione S-transferase omega 1(GSTO1)               | NM_004832    | 122.2 | 115.2 | 0.0177  | 0.905 |
|         |                                                        | XM_001714310 | 111.4 | 105.1 | 0.01797 | 0.9   |
| PPIL2   | peptidylprolyl isomerase like 2(PPIL2)                 | NM_014337    | 132.2 | 117.2 | 0.01812 | 0.844 |
| PPIL2   | peptidylprolyl isomerase like 2(PPIL2)                 | NM_014337    | 182.9 | 188.4 | 0.01812 | 0.844 |
| PHF12   | PHD finger protein 12(PHF12)                           | NM_020889    | 114   | 135.7 | 0.01823 | 1.14  |
| TTC19   | tetratricopeptide repeat domain 19(TTC19)              | NM_017775    | 97.6  | 113.4 | 0.01824 | 1.114 |
| CAMK1D  | calcium/calmodulin dependent protein kinase ID(CAMK1D) | AK097377     | 263.2 | 521.1 | 0.01826 | 1.717 |
| DUSP10  | dual specificity phosphatase 10(DUSP10)                | NM_007207    | 103.7 | 94.9  | 0.01855 | 0.862 |
| BRD7    | bromodomain containing 7(BRD7)                         | NM_013263    | 111.9 | 104.4 | 0.01868 | 0.878 |
| SOX4    | SRY-box 4(SOX4)                                        | NM_003107    | 227.9 | 498.5 | 0.01876 | 1.891 |
| HIF3A   | hypoxia inducible factor 3 alpha subunit(HIF3A)        | NM_022462    | 114.3 | 139.9 | 0.01887 | 1.166 |

|              |                                                                        |                  |       |       |         |       |
|--------------|------------------------------------------------------------------------|------------------|-------|-------|---------|-------|
|              |                                                                        | XM_00171<br>5696 | 116.8 | 111   | 0.01896 | 0.91  |
| MAFF         | MAF bZIP transcription<br>factor F(MAFF)                               | NM_0123<br>23    | 183.4 | 173.6 | 0.01903 | 0.855 |
| TRIM47       | tripartite motif containing<br>47(TRIM47)                              | NM_0334<br>52    | 104.5 | 123.2 | 0.01921 | 1.118 |
| ADCY7        | adenylate cyclase<br>7(ADCY7)                                          | NM_0011<br>14    | 260.2 | 480.8 | 0.01934 | 1.625 |
| ADCY6        | adenylate cyclase<br>6(ADCY6)                                          | NM_0209<br>83    | 173   | 239.1 | 0.01934 | 1.625 |
| MAP3K4       | mitogen-activated<br>protein kinase kinase<br>kinase 4(MAP3K4)         | NM_0059<br>22    | 157   | 140.3 | 0.01935 | 0.822 |
|              |                                                                        | XM_93383<br>6    | 122.2 | 115.4 | 0.01944 | 0.907 |
| HLA-<br>DQB2 | major histocompatibility<br>complex, class II, DQ<br>beta 2(HLA-DQB2)  | NM_1825<br>49    | 147.6 | 137.5 | 0.01945 | 0.88  |
|              |                                                                        | XR_01768<br>9    | 128.7 | 124.7 | 0.01946 | 0.914 |
| ASAP2        | ArfGAP with SH3<br>domain, ankyrin repeat<br>and PH domain<br>2(ASAP2) | NM_0038<br>87    | 112.3 | 100   | 0.01946 | 0.869 |
| ASAP2        | ArfGAP with SH3<br>domain, ankyrin repeat<br>and PH domain<br>2(ASAP2) | NM_0038<br>87    | 280.6 | 369.1 | 0.01946 | 0.869 |

|             |                                                                  |                  |        |        |         |       |
|-------------|------------------------------------------------------------------|------------------|--------|--------|---------|-------|
| ASAP2       | ArfGAP with SH3 domain, ankyrin repeat and PH domain<br>2(ASAP2) | NM_0038<br>87    | 293    | 451.6  | 0.01946 | 0.869 |
|             |                                                                  | AW08871<br>7     | 87.6   | 105.6  | 0.01956 | 1.168 |
| FOXO4       | forkhead box<br>O4(FOXO4)                                        | NM_0059<br>38    | 273    | 450.4  | 0.0196  | 1.44  |
| FOXO3       | forkhead box<br>O3(FOXO3)                                        | NM_2015<br>59    | 197.9  | 344.8  | 0.0196  | 1.44  |
| ACER3       | alkaline ceramidase<br>3(ACER3)                                  | NM_0183<br>67    | 123.9  | 121.4  | 0.01965 | 0.699 |
| ACHE        | acetylcholinesterase<br>(Cartwright blood group)(ACHE)           | NM_0158<br>31    | 213.5  | 160    | 0.01965 | 0.699 |
| HNRNP<br>H1 | heterogeneous nuclear<br>ribonucleoprotein H1<br>(H)(HNRNPH1)    | NM_0055<br>20    | 144.4  | 155.1  | 0.01969 | 1.357 |
| HNRNP<br>H1 | heterogeneous nuclear<br>ribonucleoprotein H1<br>(H)(HNRNPH1)    | NM_0055<br>20    | 144.8  | 200.9  | 0.01969 | 1.357 |
| HNRNP<br>H1 | heterogeneous nuclear<br>ribonucleoprotein H1<br>(H)(HNRNPH1)    | NM_0055<br>20    | 1152.8 | 1768.4 | 0.01969 | 1.357 |
| CCNK        | cyclin K(CCNK)                                                   | NM_0038<br>58    | 93.5   | 110.5  | 0.01975 | 1.141 |
| DEFA1B      | defensin alpha<br>1B(DEFA1B)                                     | NM_0010<br>42500 | 92.5   | 114.2  | 0.01976 | 1.177 |
| OR2B6       | olfactory receptor family<br>2 subfamily B member<br>6(OR2B6)    | NM_0123<br>67    | 113.9  | 108.7  | 0.01984 | 0.919 |

|             |                                                              |                  |        |        |         |       |
|-------------|--------------------------------------------------------------|------------------|--------|--------|---------|-------|
| BRD9        | bromodomain<br>containing 9(BRD9)                            | NM_0239<br>24    | 387.8  | 306.3  | 0.01987 | 0.71  |
| BRD8        | bromodomain<br>containing 8(BRD8)                            | NM_1833<br>59    | 205.6  | 261.6  | 0.01987 | 0.71  |
| PRPF40<br>B | pre-mRNA processing<br>factor 40 homolog<br>B(PRPF40B)       | NM_0010<br>31698 | 113.8  | 138.2  | 0.01988 | 1.165 |
| CTAG2       | cancer/testis antigen<br>2(CTAG2)                            | NM_0209<br>94    | 119.5  | 107    | 0.02006 | 0.879 |
| ATL3        | atlastin GTPase 3(ATL3)                                      | NM_0154<br>59    | 88.8   | 106.2  | 0.02007 | 1.169 |
| ZFHX3       | zinc finger homeobox<br>3(ZFHX3)                             | NM_0068<br>85    | 161.7  | 298.1  | 0.02023 | 1.591 |
|             |                                                              | XM_92607<br>3    | 121.5  | 115.3  | 0.02028 | 0.903 |
|             |                                                              | XM_00112<br>5745 | 102.8  | 105.3  | 0.02028 | 0.861 |
|             |                                                              | XM_00112<br>5745 | 104.3  | 94.6   | 0.02028 | 0.861 |
| TCTE3       | t-complex-associated-<br>testis-expressed<br>3(TCTE3)        | NM_1749<br>10    | 95.5   | 117.8  | 0.02032 | 1.186 |
|             |                                                              | XM_92861<br>9    | 177.5  | 168.5  | 0.02033 | 0.882 |
| ACSS2       | acyl-CoA synthetase<br>short-chain family<br>member 2(ACSS2) | NM_0010<br>76552 | 116.3  | 101.8  | 0.0204  | 0.822 |
| ACSS2       | acyl-CoA synthetase<br>short-chain family<br>member 2(ACSS2) | NM_0186<br>77    | 1898.7 | 1215.1 | 0.0204  | 0.822 |

|             |                                                                                     |                  |       |         |         |       |
|-------------|-------------------------------------------------------------------------------------|------------------|-------|---------|---------|-------|
| ITGB2       | integrin subunit beta<br>2(ITGB2)                                                   | NM_0002<br>11    | 717.3 | 1190.7  | 0.02047 | 1.437 |
| PPP2R2<br>B | protein phosphatase 2<br>regulatory subunit<br>Bbeta(PPP2R2B)                       | NM_1816<br>76    | 96.8  | 121.6   | 0.0205  | 1.224 |
| PPP2R2<br>B | protein phosphatase 2<br>regulatory subunit<br>Bbeta(PPP2R2B)                       | NM_1816<br>76    | 165.8 | 336     | 0.0205  | 1.224 |
| ZNF451      | zinc finger protein<br>451(ZNF451)                                                  | NM_0010<br>31623 | 101.2 | 112.8   | 0.02055 | 1.245 |
| ZNF451      | zinc finger protein<br>451(ZNF451)                                                  | NM_0010<br>31623 | 105.3 | 136.7   | 0.02055 | 1.245 |
|             |                                                                                     | XM_94072<br>6    | 110.2 | 98.1    | 0.02058 | 0.847 |
|             |                                                                                     | XM_94072<br>6    | 136.9 | 138.7   | 0.02058 | 0.847 |
| f2rl2       | coagulation factor II<br>thrombin receptor like<br>2(F2RL2)                         | NM_0041<br>01    | 16746 | 19918.8 | 0.02059 | 1.189 |
|             |                                                                                     | XM_92795<br>7    | 130.6 | 118.9   | 0.02066 | 0.856 |
| GUF1        | GUF1 homolog,<br>GTPase(GUF1)                                                       | NM_0219<br>27    | 109   | 151.7   | 0.02068 | 1.295 |
| or8g1       | olfactory receptor family<br>8 subfamily G member 1<br>(gene/pseudogene)(OR<br>8G1) | NM_0010<br>02905 | 111.3 | 102.1   | 0.02076 | 0.875 |
| ADD1        | adducin 1(ADD1)                                                                     | NM_0011<br>19    | 135.1 | 102.5   | 0.02083 | 0.732 |



|              |                                                 |              |        |        |         |       |           |      |       |
|--------------|-------------------------------------------------|--------------|--------|--------|---------|-------|-----------|------|-------|
|              | uncharacterized                                 |              |        |        |         |       |           |      |       |
| LOC102724002 | LOC102724002(LOC102724002)                      | AK025166     | 110.4  | 127.3  | 0.02097 | 1.116 |           |      |       |
| TOR2A        | torsin family 2 member A(TOR2A)                 | NM_130459    | 93     | 122.1  | 0.02099 | 1.263 |           |      |       |
|              |                                                 | XM_001133423 | 98.7   | 115.5  | 0.02112 | 1.112 |           |      |       |
| LRRN4CL      | LRRN4 C-terminal like(LRRN4CL)                  | NM_203422    | 176.6  | 309.6  | 0.02115 | 1.57  |           |      |       |
| SERTAD1      | SERTA domain containing 1(SERTAD1)              | NM_013376    | 288.4  | 483.5  | 0.02118 | 1.464 |           |      |       |
| RSBN1L       | round spermatid basic protein 1 like(RSBN1L)    | NM_198467    | 107.1  | 132.8  | 0.02119 | 1.186 |           |      |       |
| c14orf166    | chromosome 14 open reading frame 166(C14orf166) | NM_016039    | 185.8  | 441.1  | 0.02125 | 2.099 |           |      |       |
| SAFB2        | scaffold attachment factor B2(SAFB2)            | NM_014649    | 125.4  | 127.8  | 0.0213  | 0.788 |           |      |       |
| SAFB2        | scaffold attachment factor B2(SAFB2)            | NM_014649    | 758.5  | 683    | 0.0213  | 0.788 |           |      |       |
|              |                                                 | CK299443     | 149.4  | 135.7  | 0.02132 | 0.864 |           |      |       |
| ELAVL1       | ELAV like RNA binding protein 1(ELAVL1)         | NM_001419    | 1332.8 | 1198.1 | 0.02133 | 0.763 | NM_144744 | 0.11 | 40.01 |
| DKKL1        | dickkopf like acrosomal protein 1(DKKL1)        | NM_014419    | 847.9  | 2015.2 | 0.02142 | 2.089 |           |      |       |
| DPH3         | diphthamide biosynthesis 3(DPH3)                | NM_001047434 | 422.9  | 685.1  | 0.02147 | 1.426 |           |      |       |

|             |                                                                                |                  |       |       |         |       |
|-------------|--------------------------------------------------------------------------------|------------------|-------|-------|---------|-------|
|             | aminoacyl tRNA<br>synthetase complex<br>interacting<br>multifunctional protein | NM_0063<br>03    | 125.2 | 114.1 | 0.02159 | 0.878 |
| AIMP2       | 2(AIMP2)                                                                       | XM_37937<br>8    | 108.6 | 127.6 | 0.0216  | 1.113 |
| ILK         | integrin linked<br>kinase(ILK)                                                 | NM_0045<br>17    | 200.8 | 295   | 0.02166 | 1.285 |
| MBTPS1      | membrane bound<br>transcription factor<br>peptidase, site<br>1(MBTPS1)         | NM_0037<br>91    | 166.4 | 241.1 | 0.02168 | 1.307 |
| MBTPS1      | membrane bound<br>transcription factor<br>peptidase, site<br>1(MBTPS1)         | NM_0037<br>91    | 182.9 | 208.1 | 0.02168 | 1.307 |
| C1orf74     | chromosome 1 open<br>reading frame<br>74(C1orf74)                              | NM_1524<br>85    | 117.9 | 107.9 | 0.02172 | 0.873 |
|             |                                                                                | XM_00172<br>1243 | 92.6  | 110.3 | 0.02172 | 1.146 |
| SNORA2<br>C | small nucleolar RNA,<br>H/ACA box<br>2C(SNORA2C)                               | NR_00296<br>8    | 100.9 | 119.4 | 0.02172 | 1.125 |
|             |                                                                                | XM_00171<br>6887 | 115.4 | 154.2 | 0.02184 | 1.268 |
|             |                                                                                | XM_94035<br>3    | 114.2 | 106.7 | 0.02191 | 0.894 |
| TAGLN       | transgelin(TAGLN)                                                              | NM_0031<br>86    | 343.4 | 753.9 | 0.02196 | 1.675 |

|             |                                                        |                  |        |        |         |       |
|-------------|--------------------------------------------------------|------------------|--------|--------|---------|-------|
| TAGLN       | transgelin(TAGLN)                                      | NM_0031<br>86    | 1523   | 2874.1 | 0.02196 | 1.675 |
| CEPT1       | choline/ethanolamine<br>phosphotransferase<br>1(CEPT1) | NM_0060<br>90    | 139.7  | 130.3  | 0.02205 | 0.872 |
| MYL9        | myosin light chain<br>9(MYL9)                          | NM_0060<br>97    | 185.8  | 203.6  | 0.02227 | 1.349 |
| MYL9        | myosin light chain<br>9(MYL9)                          | NM_0060<br>97    | 222    | 341.8  | 0.02227 | 1.349 |
|             |                                                        | XM_92719<br>6    | 109.4  | 103.7  | 0.02243 | 0.892 |
| S100A1<br>3 | S100 calcium binding<br>protein A13(S100A13)           | NM_0010<br>24211 | 122.2  | 200.3  | 0.02246 | 1.49  |
| S100A1<br>3 | S100 calcium binding<br>protein A13(S100A13)           | NM_0010<br>24211 | 170.6  | 178    | 0.02246 | 1.49  |
| PDGFA       | platelet derived growth<br>factor subunit A(PDGFA)     | NM_0330<br>23    | 123.1  | 166.8  | 0.02255 | 1.263 |
| SIDT2       | SID1 transmembrane<br>family member 2(SIDT2)           | NM_0010<br>40455 | 350.6  | 349.9  | 0.02287 | 0.87  |
| SEPT4       | septin 4(SEPT4)                                        | NM_0804<br>15    | 1066.6 | 1678.5 | 0.02295 | 1.379 |
| TGIF1       | TGFB induced factor<br>homeobox 1(TGIF1)               | NM_1706<br>95    | 197.5  | 302.5  | 0.02298 | 1.35  |
| TGIF1       | TGFB induced factor<br>homeobox 1(TGIF1)               | NM_1706<br>95    | 284.3  | 451.6  | 0.02298 | 1.35  |
|             |                                                        | XM_49896<br>9    | 203.5  | 155.4  | 0.02308 | 0.718 |

|         |                                                                        |               |       |       |         |       |
|---------|------------------------------------------------------------------------|---------------|-------|-------|---------|-------|
| ATG4A   | autophagy related 4A<br>cysteine<br>peptidase(ATG4A)                   | NM_1782<br>70 | 100.5 | 93.6  | 0.02313 | 0.877 |
| ORC3    | origin recognition<br>complex subunit<br>3(ORC3)                       | NM_1818<br>37 | 100.3 | 134.1 | 0.02325 | 1.267 |
| ZFX     | zinc finger protein, X-<br>linked(ZFX)                                 | NM_0034<br>10 | 95.7  | 116.2 | 0.02342 | 1.16  |
|         |                                                                        | XR_03720<br>3 | 378   | 584.7 | 0.02343 | 1.362 |
|         |                                                                        | AI005586      | 101   | 122.5 | 0.02367 | 1.144 |
| NIPAL1  | NIPA like domain<br>containing 1(NIPAL1)                               | NM_2073<br>30 | 127.6 | 148.1 | 0.02372 | 1.113 |
|         |                                                                        | XM_92872<br>2 | 125.3 | 118.7 | 0.02373 | 0.911 |
| C1orf87 | chromosome 1 open<br>reading frame<br>87(C1orf87)                      | NM_1523<br>77 | 94.1  | 109.7 | 0.02376 | 1.141 |
| C1QA    | complement C1q A<br>chain(C1QA)                                        | NM_0159<br>91 | 104.5 | 115.3 | 0.02376 | 1.141 |
| AMZ2P1  | archaelysin family<br>metallopeptidase 2<br>pseudogene 1(AMZ2P1)       | NM_1530<br>32 | 302.1 | 551.9 | 0.02377 | 1.58  |
| PIGV    | phosphatidylinositol<br>glycan anchor<br>biosynthesis class<br>V(PIGV) | NM_0178<br>37 | 112   | 104.2 | 0.02381 | 0.875 |

|          |                                                        |              |        |        |         |       |
|----------|--------------------------------------------------------|--------------|--------|--------|---------|-------|
|          | transmembrane protein<br>158                           |              |        |        |         |       |
| TMEM158  | (gene/pseudogene)(TMEM158)                             | NM_015444    | 224.3  | 1619.8 | 0.02384 | 6.279 |
| scaf8    | SR-related CTD associated factor 8(SCAF8)              | NM_014892    | 144.7  | 214    | 0.02396 | 1.296 |
| APCS     | amyloid P component, serum(APCS)                       | NM_001639    | 130.2  | 304.7  | 0.02396 | 2.035 |
|          |                                                        | XM_001716882 | 119.4  | 187.4  | 0.02399 | 1.452 |
| DCP1A    | decapping mRNA 1A(DCP1A)                               | NM_018403    | 433.8  | 1278.5 | 0.02402 | 2.633 |
|          |                                                        | BC035064     | 95     | 108.8  | 0.02409 | 1.105 |
| setmar   | SET domain and mariner transposase fusion gene(SETMAR) | NM_006515    | 201    | 301.3  | 0.02416 | 1.305 |
| GDF9     | growth differentiation factor 9(GDF9)                  | NM_005260    | 89.5   | 107.5  | 0.02425 | 1.163 |
| SGCE     | sarcoglycan epsilon(SGCE)                              | NM_001099400 | 391.5  | 695.5  | 0.02436 | 1.536 |
| ZNF789   | zinc finger protein 789(ZNF789)                        | NM_001013258 | 112.3  | 154.8  | 0.02438 | 1.284 |
|          |                                                        | XM_941746    | 101.5  | 130.2  | 0.02441 | 1.219 |
| KIAA1429 | KIAA1429(KIAA1429)                                     | NM_183009    | 93.6   | 111.7  | 0.02442 | 1.152 |
| PTK2     | protein tyrosine kinase 2(PTK2)                        | NM_005607    | 1002.1 | 1702.9 | 0.02444 | 1.484 |

|         |                                          |              |       |       |         |       |
|---------|------------------------------------------|--------------|-------|-------|---------|-------|
| PDX1    | pancreatic and duodenal homeobox 1(PDX1) | NM_000209    | 150.3 | 142   | 0.02458 | 0.886 |
| MYLK    | myosin light chain kinase(MYLK)          | NM_053032    | 239.3 | 559.1 | 0.02464 | 1.993 |
|         |                                          | XR_017001    | 118.2 | 108.6 | 0.02469 | 0.868 |
|         |                                          | XR_017364    | 236.8 | 160.9 | 0.02471 | 0.62  |
| DNM3    | dynamamin 3(DNM3)                        | NM_015569    | 132   | 123.2 | 0.02486 | 0.878 |
|         |                                          | XR_018230    | 90.2  | 109.7 | 0.02487 | 1.179 |
|         |                                          | XM_001713713 | 101.5 | 116.1 | 0.02491 | 1.1   |
| RPS6KA3 | ribosomal protein S6 kinase A3(RPS6KA3)  | NM_004586    | 99.5  | 115   | 0.02507 | 1.236 |
| RPS6KA3 | ribosomal protein S6 kinase A3(RPS6KA3)  | NM_004586    | 127.2 | 176.7 | 0.02507 | 1.236 |
| HOXC10  | homeobox C10(HOXC10)                     | NM_017409    | 343.8 | 869.4 | 0.02507 | 2.234 |
| CBL     | Cbl proto-oncogene(CBL)                  | NM_005188    | 171.7 | 142.1 | 0.02513 | 0.799 |
| GPN1    | GPN-loop GTPase 1(GPN1)                  | NM_007266    | 129.6 | 315.4 | 0.0252  | 1.183 |
| GPM6B   | glycoprotein M6B(GPM6B)                  | NM_001001995 | 96.8  | 119.1 | 0.0252  | 1.183 |
|         |                                          | XM_370711    | 108.5 | 100.6 | 0.02535 | 0.885 |

|              |                                                                               |                  |       |        |         |       |
|--------------|-------------------------------------------------------------------------------|------------------|-------|--------|---------|-------|
| ORMDL<br>1   | ORMDL sphingolipid<br>biosynthesis regulator<br>1(ORMDL1)                     | NM_0164<br>67    | 107.8 | 129.3  | 0.02553 | 1.158 |
| IFNGR2       | interferon gamma<br>receptor 2 (interferon<br>gamma transducer<br>1)(IFNGR2)  | NM_0055<br>34    | 79.7  | 98.7   | 0.02557 | 1.218 |
| SLC13A<br>2  | solute carrier family 13<br>member 2(SLC13A2)                                 | NM_0039<br>84    | 281.3 | 207.6  | 0.02559 | 0.68  |
| FAM98B       | family with sequence<br>similarity 98 member<br>B(FAM98B)                     | NM_0010<br>42429 | 347.8 | 311    | 0.02568 | 0.795 |
| CEACA<br>M21 | carcinoembryonic<br>antigen related cell<br>adhesion molecule<br>21(CEACAM21) | NM_0010<br>98506 | 106.4 | 130.3  | 0.02569 | 1.163 |
| RUFY3        | RUN and FYVE domain<br>containing 3(RUFY3)                                    | NM_0010<br>37442 | 104   | 121.5  | 0.02572 | 1.124 |
| RUFY3        | RUN and FYVE domain<br>containing 3(RUFY3)                                    | NM_0010<br>37442 | 349.3 | 465.4  | 0.02572 | 1.124 |
| OSGEPL<br>1  | O-sialoglycoprotein<br>endopeptidase like<br>1(OSGEPL1)                       | NM_0223<br>53    | 107.6 | 116.1  | 0.02575 | 0.911 |
| OSGEPL<br>1  | O-sialoglycoprotein<br>endopeptidase like<br>1(OSGEPL1)                       | NM_0223<br>53    | 111.9 | 105.9  | 0.02575 | 0.911 |
|              |                                                                               | CD242195         | 119.9 | 113.3  | 0.02585 | 0.896 |
| GOLGB1       | golgin B1(GOLGB1)                                                             | NM_0044<br>87    | 767   | 1093.7 | 0.026   | 1.244 |

|         |                                                                         |              |       |       |         |       |
|---------|-------------------------------------------------------------------------|--------------|-------|-------|---------|-------|
| FKBP8   | FK506 binding protein 8(FKBP8)                                          | NM_012181    | 194.9 | 170.1 | 0.02609 | 0.813 |
| HTR3A   | 5-hydroxytryptamine receptor 3A(HTR3A)                                  | NM_000869    | 109.4 | 162.8 | 0.02612 | 1.411 |
| PRR4    | proline rich 4 (lacrimal)(PRR4)                                         | NM_001098538 | 116.9 | 108.1 | 0.02613 | 0.858 |
| OGFOD3  | 2-oxoglutarate and iron dependent oxygenase domain containing 3(OGFOD3) | NM_175902    | 108.8 | 99    | 0.02616 | 0.867 |
|         |                                                                         | XM_001725354 | 119.8 | 108.9 | 0.02617 | 0.865 |
| VWA1    | von Willebrand factor A domain containing 1(VWA1)                       | NM_022834    | 101.9 | 125.3 | 0.02625 | 1.189 |
| fcr12   | Fc receptor like 2(FCRL2)                                               | NM_030764    | 187.4 | 135.9 | 0.02637 | 0.675 |
| PSEN1   | presenilin 1(PSEN1)                                                     | NM_007318    | 111.6 | 130.4 | 0.02646 | 1.108 |
| Dgcr5   | DiGeorge syndrome critical region gene 5 (non-protein coding)(DGCR5)    | NR_002733    | 98.8  | 122.5 | 0.02684 | 1.163 |
| TUBGCP4 | tubulin gamma complex associated protein 4(TUBGCP4)                     | NM_014444    | 96.3  | 114.7 | 0.02686 | 1.148 |
| PCP4    | Purkinje cell protein 4(PCP4)                                           | NM_006198    | 96.1  | 159.9 | 0.02691 | 1.528 |
| PSMA7   | proteasome subunit alpha 7(PSMA7)                                       | NM_152255    | 114.1 | 103   | 0.02694 | 0.857 |



|        |                                                                |                  |        |        |         |       |
|--------|----------------------------------------------------------------|------------------|--------|--------|---------|-------|
| TPP1   | tripeptidyl peptidase<br>1(TPP1)                               | NM_0003<br>91    | 1257   | 865.7  | 0.02701 | 0.592 |
| UTRN   | utrophin(UTRN)                                                 | NM_0071<br>24    | 106.4  | 147.9  | 0.02706 | 1.298 |
| MYO1C  | myosin IC(MYO1C)                                               | NM_0333<br>75    | 146.8  | 136.1  | 0.02711 | 0.886 |
| CDK4   | cyclin dependent kinase<br>4(CDK4)                             | NM_0000<br>75    | 1229.8 | 2746.6 | 0.02714 | 2.031 |
|        |                                                                | AA484800         | 107.6  | 93.7   | 0.02724 | 0.846 |
| TARBP2 | TARBP2, RISC loading<br>complex RNA binding<br>subunit(TARBP2) | NM_1343<br>23    | 100    | 119.5  | 0.02734 | 1.137 |
| XRRA1  | X-ray radiation<br>resistance associated<br>1(XRRA1)           | NM_1829<br>69    | 134.2  | 125.3  | 0.02735 | 0.889 |
| CRK    | CRK proto-oncogene,<br>adaptor protein(CRK)                    | NM_0168<br>23    | 128.2  | 168.4  | 0.02736 | 1.209 |
| CRK    | CRK proto-oncogene,<br>adaptor protein(CRK)                    | NM_0168<br>23    | 147.1  | 173    | 0.02736 | 1.209 |
| CRK    | CRK proto-oncogene,<br>adaptor protein(CRK)                    | NM_0168<br>23    | 250.1  | 347.5  | 0.02736 | 1.209 |
|        |                                                                | XM_00171<br>3654 | 6200.5 | 6337.7 | 0.02746 | 0.888 |
| VCL    | vinculin(VCL)                                                  | NM_0140<br>00    | 1068   | 1829.8 | 0.02752 | 1.505 |
| PLPP2  | phospholipid<br>phosphatase 2(PLPP2)                           | NM_1775<br>26    | 102.4  | 119.2  | 0.02753 | 1.123 |
| AMOTL2 | angiomotin like<br>2(AMOTL2)                                   | NM_0162<br>01    | 284.1  | 233.1  | 0.02772 | 0.729 |
| LCE1B  | late cornified envelope<br>1B(LCE1B)                           | NM_1783<br>49    | 131.2  | 120    | 0.02772 | 0.875 |

|          |                                                     |              |       |       |         |       |
|----------|-----------------------------------------------------|--------------|-------|-------|---------|-------|
|          |                                                     | AW34125      |       |       |         |       |
|          |                                                     | 7            | 126.1 | 117.1 | 0.02774 | 0.848 |
| GPX5     | glutathione peroxidase 5(GPX5)                      | NM_001509    | 124.2 | 106.9 | 0.02786 | 0.784 |
| GPX8     | glutathione peroxidase 8 (putative)(GPX8)           | NM_001008397 | 135.3 | 109.9 | 0.02786 | 0.784 |
| SCN7A    | sodium voltage-gated channel alpha subunit 7(SCN7A) | NM_002976    | 143.4 | 125.8 | 0.02787 | 0.838 |
| ZNF691   | zinc finger protein 691(ZNF691)                     | NM_015911    | 146.1 | 131.7 | 0.02793 | 0.838 |
|          |                                                     | XM_001126896 | 121.5 | 113.4 | 0.02794 | 0.9   |
| c1orf116 | chromosome 1 open reading frame 116(C1orf116)       | NM_023938    | 249.6 | 190.8 | 0.02798 | 0.674 |
|          |                                                     | CD514751     | 111.1 | 106.3 | 0.028   | 0.917 |
|          |                                                     | XM_001713613 | 100.5 | 93.9  | 0.02801 | 0.878 |
| ccdc15   | coiled-coil domain containing 15(CCDC15)            | NM_025004    | 94.6  | 99.7  | 0.02803 | 1.132 |
| CCDC150  | coiled-coil domain containing 150(CCDC150)          | NM_173646    | 107.3 | 128.6 | 0.02803 | 1.132 |
|          |                                                     | XR_015544    | 218.2 | 193   | 0.02813 | 0.808 |
| MSMO1    | methylsterol monooxygenase 1(MSMO1)                 | NM_006745    | 144.3 | 246.1 | 0.0282  | 1.452 |

|             |                                                   |              |       |        |         |       |           |       |      |
|-------------|---------------------------------------------------|--------------|-------|--------|---------|-------|-----------|-------|------|
| POGZ        | pogo transposable element with ZNF domain(POGZ)   | NM_015100    | 112.2 | 150.6  | 0.02825 | 1.248 |           |       |      |
| SERTAD4-AS1 | SERTAD4 antisense RNA 1(SERTAD4-AS1)              | NR_024337    | 112.5 | 153.9  | 0.02827 | 1.291 |           |       |      |
|             |                                                   | XM_937676    | 143.9 | 135.7  | 0.02827 | 0.89  |           |       |      |
| FERD3L      | Fer3 like bHLH transcription factor(FERD3L)       | NM_152898    | 249.8 | 267    | 0.02837 | 0.86  |           |       |      |
| FER1L5      | fer-1 like family member 5(FER1L5)                | NM_001077400 | 167.4 | 152.7  | 0.02837 | 0.86  |           |       |      |
| FGF13       | fibroblast growth factor 13(FGF13)                | NM_033642    | 95.8  | 111    | 0.02843 | 1.118 |           |       |      |
|             |                                                   | XM_001715647 | 137.4 | 129.6  | 0.02845 | 0.89  |           |       |      |
| NGDN        | neuroguidin(NGDN)                                 | NM_015514    | 125   | 127.8  | 0.02871 | 1.31  | NM_017196 | 14.73 | 0.69 |
| NGDN        | neuroguidin(NGDN)                                 | NM_015514    | 160.8 | 240    | 0.02871 | 1.31  | NM_017196 | 14.73 | 0.69 |
| ITGA2       | integrin subunit alpha 2(ITGA2)                   | NM_002203    | 693.2 | 1187.6 | 0.02886 | 1.504 |           |       |      |
| HNRNPU      | heterogeneous nuclear ribonucleoprotein U(HNRNPU) | NM_004501    | 475.3 | 1009.4 | 0.02894 | 1.854 | NM_017196 | 14.73 | 0.69 |
| HNRNPR      | heterogeneous nuclear ribonucleoprotein R(HNRNPR) | NM_005826    | 402.4 | 867.3  | 0.02894 | 1.854 |           |       |      |
| LOC441666   | zinc finger protein 91 pseudogene(LOC441666)      | NR_024380    | 122.9 | 112.8  | 0.02896 | 0.875 |           |       |      |

|               |                                                        |                  |       |        |         |       |               |      |       |
|---------------|--------------------------------------------------------|------------------|-------|--------|---------|-------|---------------|------|-------|
|               |                                                        | XM_00112<br>8586 | 95.5  | 121.3  | 0.029   | 1.186 |               |      |       |
| NETO1         | neuropilin and tolloid like 1(NETO1)                   | AK123319         | 118.2 | 111.3  | 0.02906 | 0.889 | NM_031<br>356 | 5.43 | 24.53 |
| AVP           | arginine vasopressin(AVP)                              | NM_0004<br>90    | 133.2 | 124.1  | 0.02907 | 0.894 | NM_031<br>356 | 5.43 | 24.53 |
| AVPI1         | arginine vasopressin induced 1(AVPI1)                  | NM_0217<br>32    | 139.9 | 163.5  | 0.02907 | 0.894 |               |      |       |
|               |                                                        | XM_00171<br>8145 | 94.8  | 113.1  | 0.02919 | 1.145 |               |      |       |
| ZC2HC1<br>A   | zinc finger C2HC-type containing 1A(ZC2HC1A)           | NM_0160<br>10    | 101.2 | 108.9  | 0.0292  | 1.306 |               |      |       |
| ZC2HC1<br>A   | zinc finger C2HC-type containing 1A(ZC2HC1A)           | NM_0160<br>10    | 126.1 | 180    | 0.0292  | 1.306 |               |      |       |
| HVCN1         | hydrogen voltage gated channel 1(HVCN1)                | NM_0010<br>40107 | 120.9 | 111.6  | 0.02928 | 0.871 |               |      |       |
| DIXDC1        | DIX domain containing 1(DIXDC1)                        | NM_0010<br>37954 | 117   | 163.8  | 0.02932 | 1.305 |               |      |       |
| DKC1          | dyskerin pseudouridine synthase 1(DKC1)                | NM_0013<br>63    | 154.8 | 168.3  | 0.02932 | 1.305 |               |      |       |
| CD36          | CD36 molecule(CD36)                                    | NM_0000<br>72    | 536.7 | 1163.6 | 0.02933 | 1.957 |               |      |       |
| CD34          | CD34 molecule(CD34)                                    | NM_0017<br>73    | 157.2 | 158.6  | 0.02933 | 1.957 |               |      |       |
| CD34          | CD34 molecule(CD34)                                    | NM_0017<br>73    | 408.5 | 908.2  | 0.02933 | 1.957 |               |      |       |
| LINC011<br>32 | long intergenic non-protein coding RNA 1132(LINC01132) | AK125357         | 112.3 | 105    | 0.02951 | 0.883 |               |      |       |

|         |                                             |              |       |       |         |       |           |       |      |
|---------|---------------------------------------------|--------------|-------|-------|---------|-------|-----------|-------|------|
|         | single stranded DNA binding protein         | NM_0326      |       |       |         |       |           |       |      |
| SSBP4   | 4(SSBP4)                                    | 27           | 124.6 | 189.1 | 0.02955 | 1.401 |           |       |      |
|         | ribosomal protein                           | NM_0154      |       |       |         |       |           |       |      |
| RPL36   | L36(RPL36)                                  | 14           | 95.5  | 115.4 | 0.02965 | 1.161 |           |       |      |
|         |                                             | XM_001713717 | 162   | 255.8 | 0.0297  | 1.381 |           |       |      |
|         |                                             | XM_001717999 | 174.3 | 148.6 | 0.0297  | 0.797 | NM_017135 | 41.45 | 2.88 |
|         | hypoxia inducible factor                    | NM_0015      |       |       |         |       | NM_017135 |       |      |
| HIF1A   | 1 alpha subunit(HIF1A)                      | 30           | 97.6  | 121.3 | 0.02976 | 1.203 | NM_017135 | 41.45 | 2.88 |
|         | hypoxia inducible factor                    | NM_1810      |       |       |         |       | NM_017135 |       |      |
| HIF1A   | 1 alpha subunit(HIF1A)                      | 54           | 116.8 | 189.3 | 0.02976 | 1.203 | NM_017135 | 41.45 | 2.88 |
|         |                                             | XM_001719745 | 104.4 | 149.5 | 0.02976 | 1.313 | NM_017135 | 41.45 | 2.88 |
|         | argonaute 3, RISC catalytic component(AGO3) | NM_1774      |       |       |         |       | NM_017135 |       |      |
| AGO3    |                                             | 22           | 159   | 149   | 0.02976 | 0.857 | NM_017135 | 41.45 | 2.88 |
|         | FK506 binding protein                       | NM_0540      |       |       |         |       |           |       |      |
| FKBP1A  | 1A(FKBP1A)                                  | 14           | 147.4 | 154.1 | 0.02979 | 1.329 |           |       |      |
|         | FK506 binding protein                       | NM_0540      |       |       |         |       |           |       |      |
| FKBP1A  | 1A(FKBP1A)                                  | 14           | 368.7 | 566.7 | 0.02979 | 1.329 |           |       |      |
|         | FK506 binding protein                       | NM_0540      |       |       |         |       |           |       |      |
| FKBP1A  | 1A(FKBP1A)                                  | 14           | 412.5 | 668   | 0.02979 | 1.329 |           |       |      |
|         | zinc finger protein                         | NM_0034      |       |       |         |       |           |       |      |
| ZNF177  | 177(ZNF177)                                 | 51           | 170.1 | 215.6 | 0.02983 | 1.139 |           |       |      |
|         | dynein light chain roadblock-type           | NM_0141      |       |       |         |       |           |       |      |
| DYNLRB1 | 1(DYNLRB1)                                  | 83           | 112.6 | 121.7 | 0.02987 | 1.216 |           |       |      |

|          |                                               |           |       |        |         |       |              |       |      |
|----------|-----------------------------------------------|-----------|-------|--------|---------|-------|--------------|-------|------|
|          | dynein light chain                            |           |       |        |         |       |              |       |      |
| DYNLRB1  | roadblock-type 1(DYNLRB1)                     | NM_014183 | 125.6 | 164.1  | 0.02987 | 1.216 |              |       |      |
|          | dynein light chain                            |           |       |        |         |       |              |       |      |
| DYNLRB1  | roadblock-type 1(DYNLRB1)                     | NM_014183 | 214.3 | 285.7  | 0.02987 | 1.216 |              |       |      |
|          | dynein light chain                            |           |       |        |         |       |              |       |      |
| DYNLRB1  | roadblock-type 1(DYNLRB1)                     | NM_014183 | 899.2 | 1510.4 | 0.02987 | 1.216 | NM_001033653 | 43.46 | 1.56 |
|          |                                               | XM_932276 | 98.7  | 115.2  | 0.0299  | 1.112 |              |       |      |
|          | receptor tyrosine kinase like orphan receptor |           |       |        |         |       |              |       |      |
| ROR2     | 2(ROR2)                                       | NM_004560 | 97.2  | 124.8  | 0.02991 | 1.234 |              |       |      |
| GOLGA6B  | golgin A6 family member B(GOLGA6B)            | NM_018652 | 193.4 | 265.4  | 0.02996 | 1.204 |              |       |      |
|          | WD repeat and SOCS box containing 1           |           |       |        |         |       |              |       |      |
| WSB1     | (WSB1)                                        | NM_134264 | 187.5 | 351    | 0.02996 | 1.625 |              |       |      |
|          | extracellular matrix protein 2                |           |       |        |         |       |              |       |      |
| ECM2     | (ECM2)                                        | NM_001393 | 119.7 | 152    | 0.02998 | 1.191 |              |       |      |
|          | family with sequence similarity 131 member A  |           |       |        |         |       |              |       |      |
| FAM131A  | (FAM131A)                                     | NM_144635 | 200.9 | 487.4  | 0.03022 | 2.11  |              |       |      |
|          |                                               | XM_938232 | 106.2 | 97.7   | 0.03028 | 0.871 |              |       |      |
|          | family with sequence similarity 160 member B2 |           |       |        |         |       |              |       |      |
| FAM160B2 | (FAM160B2)                                    | NM_022749 | 114.1 | 121    | 0.03036 | 1.137 |              |       |      |

|             |                                                       |              |       |       |         |       |
|-------------|-------------------------------------------------------|--------------|-------|-------|---------|-------|
| FAM161A     | family with sequence similarity 161 member A(FAM161A) | NM_032180    | 124.6 | 151.9 | 0.03036 | 1.137 |
| TRIL        | TLR4 interactor with leucine rich repeats(TRIL)       | NM_014817    | 318.2 | 748.9 | 0.03036 | 2.049 |
| BAK1        | BCL2 antagonist/killer 1(BAK1)                        | NM_001188    | 306.1 | 198.8 | 0.03038 | 0.597 |
| NRXN2       | neurexin 2(NRXN2)                                     | NM_138734    | 127.5 | 125.9 | 0.03055 | 0.877 |
| NRXN2       | neurexin 2(NRXN2)                                     | NM_138734    | 159.3 | 148   | 0.03055 | 0.877 |
| taf7        | TATA-box binding protein associated factor 7(TAF7)    | NM_005642    | 167.2 | 279.4 | 0.03059 | 1.448 |
| Hist2h2a a3 | histone cluster 2 H2A family member a3(HIST2H2AA3)    | NM_003516    | 99.5  | 120.8 | 0.03063 | 1.178 |
| P4HA1       | prolyl 4-hydroxylase subunit alpha 1(P4HA1)           | NM_000917    | 98.8  | 118.6 | 0.03064 | 1.136 |
|             |                                                       | AA883754     | 111.4 | 102.9 | 0.03065 | 0.876 |
| SELENOM     | selenoprotein M(SELENOM)                              | NM_080430    | 137.8 | 236   | 0.03069 | 1.523 |
| arfip1      | ADP ribosylation factor interacting protein 1(ARFIP1) | NM_001025595 | 99.4  | 121.9 | 0.03071 | 1.19  |
| B4GALT3     | beta-1,4-galactosyltransferase 3(B4GALT3)             | NM_003779    | 118.7 | 106.1 | 0.03077 | 0.874 |

|              |                                                                   |               |       |        |         |       |               |       |       |
|--------------|-------------------------------------------------------------------|---------------|-------|--------|---------|-------|---------------|-------|-------|
| SRSF3        | serine and arginine rich<br>splicing factor 3(SRSF3)              | NM_0030<br>17 | 160.3 | 248.6  | 0.03078 | 1.312 |               |       |       |
| CD34         | CD34 molecule(CD34)                                               | NM_0017<br>73 | 157.2 | 158.6  | 0.03083 | 1.913 |               |       |       |
| CD34         | CD34 molecule(CD34)                                               | NM_0017<br>73 | 408.5 | 908.2  | 0.03083 | 1.913 |               |       |       |
| CD34         | CD34 molecule(CD34)                                               | NM_0017<br>73 | 536.7 | 1163.6 | 0.03083 | 1.913 | NM_134<br>407 | 50.47 | 11.16 |
| TCF12        | transcription factor<br>12(TCF12)                                 | NM_2070<br>38 | 163.4 | 248    | 0.03084 | 1.308 |               |       |       |
| STAT5B       | signal transducer and<br>activator of transcription<br>5B(STAT5B) | NM_0124<br>48 | 206.4 | 175.5  | 0.03084 | 0.777 |               |       |       |
|              |                                                                   | XM_37354<br>7 | 101.1 | 116.1  | 0.03085 | 1.111 |               |       |       |
| ATP6V1<br>C1 | ATPase H+ transporting<br>V1 subunit<br>C1(ATP6V1C1)              | NM_0016<br>95 | 101.3 | 102.8  | 0.03087 | 0.858 |               |       |       |
| ATP6V1<br>C2 | ATPase H+ transporting<br>V1 subunit<br>C2(ATP6V1C2)              | NM_1445<br>83 | 130.8 | 121.1  | 0.03087 | 0.858 |               |       |       |
| ERF          | ETS2 repressor<br>factor(ERF)                                     | NM_0064<br>94 | 116.7 | 136.3  | 0.03088 | 1.118 |               |       |       |
| MOSPD<br>2   | motile sperm domain<br>containing 2(MOSPD2)                       | NM_1525<br>81 | 122.9 | 116.4  | 0.03089 | 0.903 |               |       |       |
| MOSPD<br>2   | motile sperm domain<br>containing 2(MOSPD2)                       | NM_1525<br>81 | 151.1 | 152.7  | 0.03089 | 0.903 |               |       |       |
| FAM65C       | family with sequence<br>similarity 65 member<br>C(FAM65C)         | NM_0808<br>29 | 453.2 | 344.6  | 0.03096 | 0.669 |               |       |       |



|        |                                              |           |        |       |         |       |              |      |       |
|--------|----------------------------------------------|-----------|--------|-------|---------|-------|--------------|------|-------|
|        |                                              | XM_93638  |        |       |         |       |              |      |       |
|        |                                              | 2         | 138.4  | 126.5 | 0.03096 | 0.867 |              |      |       |
|        |                                              | XM_00171  |        |       |         |       |              |      |       |
|        |                                              | 6660      | 116    | 103.6 | 0.03107 | 0.85  |              |      |       |
| MBIP   | MAP3K12 binding inhibitory protein 1(MBIP)   | NM_016586 | 97.4   | 117.6 | 0.03129 | 1.358 |              |      |       |
| MBIP   | MAP3K12 binding inhibitory protein 1(MBIP)   | NM_016586 | 168.4  | 261.3 | 0.03129 | 1.358 |              |      |       |
| ZNF777 | zinc finger protein 777(ZNF777)              | NM_015694 | 122.1  | 125.8 | 0.03145 | 1.213 |              |      |       |
| ZNF777 | zinc finger protein 777(ZNF777)              | NM_015694 | 141.1  | 183.9 | 0.03145 | 1.213 |              |      |       |
| ZRANB2 | zinc finger RANBP2-type containing 2(ZRANB2) | NM_005455 | 117.1  | 148.5 | 0.03154 | 1.191 |              |      |       |
| ZRANB2 | zinc finger RANBP2-type containing 2(ZRANB2) | NM_005455 | 155.9  | 197.1 | 0.03154 | 1.191 |              |      |       |
| RCN1   | reticulocalbin 1(RCN1)                       | NM_002901 | 116.1  | 167.2 | 0.03157 | 1.345 |              |      |       |
| QPRT   | quinolinate phosphoribosyltransferase(QPRT)  | NM_014298 | 1274.1 | 671.9 | 0.03159 | 0.45  |              |      |       |
| MRO    | maestro(MRO)                                 | NM_031939 | 127.7  | 109   | 0.03161 | 0.799 | NM_001033706 | 2.42 | 10.86 |
|        |                                              | XM_929740 | 115.6  | 110.6 | 0.03163 | 0.91  |              |      |       |

|        |                                                                        |           |       |       |         |       |           |        |       |
|--------|------------------------------------------------------------------------|-----------|-------|-------|---------|-------|-----------|--------|-------|
| WRNIP1 | Werner helicase interacting protein 1(WRNIP1)                          | NM_020135 | 148.8 | 203.6 | 0.03164 | 1.226 |           |        |       |
|        |                                                                        | XM_926143 | 107.9 | 100.7 | 0.03167 | 0.879 |           |        |       |
| BEND6  | BEN domain containing 6(BEND6)                                         | NM_152731 | 93.3  | 110.4 | 0.03181 | 1.152 |           |        |       |
| BEND7  | BEN domain containing 7(BEND7)                                         | NM_152751 | 98.5  | 110.8 | 0.03181 | 1.152 |           |        |       |
| MOCS1  | molybdenum cofactor synthesis 1(MOCS1)                                 | NM_005943 | 221.3 | 192.3 | 0.03183 | 0.786 | NM_153300 | 0.14   | 61.17 |
| Miat   | myocardial infarction associated transcript (non-protein coding)(MIAT) | NR_003491 | 110.1 | 138   | 0.03188 | 1.197 |           |        |       |
| EFNA4  | ephrin A4(EFNA4)                                                       | NM_182689 | 149.9 | 139.8 | 0.03197 | 0.878 | NM_032416 | 108.51 | 1.87  |
| EXT2   | exostosin glycosyltransferase 2(EXT2)                                  | NM_000401 | 242.3 | 383.3 | 0.03198 | 1.364 |           |        |       |
| NSMCE1 | NSE1 homolog, SMC5-SMC6 complex component(NSMCE1)                      | NM_145080 | 243.5 | 237   | 0.03205 | 0.849 |           |        |       |
| HYDIN  | HYDIN, axonemal central pair apparatus protein(HYDIN)                  | NM_032821 | 103   | 115.2 | 0.03205 | 0.868 |           |        |       |
| HYDIN  | HYDIN, axonemal central pair apparatus protein(HYDIN)                  | NM_032821 | 112.7 | 118.8 | 0.03205 | 0.868 |           |        |       |

|              |                                                             |                  |       |       |         |       |                  |       |      |
|--------------|-------------------------------------------------------------|------------------|-------|-------|---------|-------|------------------|-------|------|
| HYDIN        | HYDIN, axonemal<br>central pair apparatus<br>protein(HYDIN) | NM_0328<br>21    | 137.8 | 124   | 0.03205 | 0.868 |                  |       |      |
| HYDIN        | HYDIN, axonemal<br>central pair apparatus<br>protein(HYDIN) | NM_0328<br>21    | 150.8 | 144.1 | 0.03205 | 0.868 |                  |       |      |
| N4BP2L<br>2  | NEDD4 binding protein<br>2 like 2(N4BP2L2)                  | NM_0148<br>87    | 242.5 | 324.2 | 0.0321  | 1.183 |                  |       |      |
| SMAGP        | small cell adhesion<br>glycoprotein(SMAGP)                  | NM_0010<br>31628 | 112.3 | 133.5 | 0.0321  | 1.139 |                  |       |      |
| RCN3         | reticulocalbin 3(RCN3)                                      | NM_0206<br>50    | 151.3 | 142.6 | 0.03212 | 0.886 |                  |       |      |
| DYNLL2       | dynein light chain LC8-<br>type 2(DYNLL2)                   | NM_0806<br>77    | 265.3 | 487.6 | 0.03212 | 1.593 |                  |       |      |
|              |                                                             | XR_03801<br>8    | 343.3 | 292.2 | 0.03218 | 0.75  |                  |       |      |
| C6orf13<br>6 | chromosome 6 open<br>reading frame<br>136(C6orf136)         | NM_1450<br>29    | 226.6 | 175.9 | 0.03234 | 0.719 |                  |       |      |
| c6orf106     | chromosome 6 open<br>reading frame<br>106(C6orf106)         | NM_0242<br>94    | 102.6 | 107.1 | 0.03234 | 0.719 |                  |       |      |
| PTGS2        | prostaglandin-<br>endoperoxide synthase<br>2(PTGS2)         | NM_0009<br>63    | 114.5 | 293.7 | 0.0324  | 2.188 |                  |       |      |
| ADAMTS<br>L2 | ADAMTS like<br>2(ADAMTSL2)                                  | NM_0146<br>94    | 100.9 | 116.1 | 0.03243 | 1.104 | NM_001<br>191088 | 10.07 | 0.03 |
| SETBP1       | SET binding protein<br>1(SETBP1)                            | NM_0155<br>59    | 176   | 271.4 | 0.03246 | 1.362 | NM_001<br>191088 | 10.07 | 0.03 |

|          |                                                                |              |       |        |         |       |              |         |      |
|----------|----------------------------------------------------------------|--------------|-------|--------|---------|-------|--------------|---------|------|
| H3f3c    | H3 histone family member 3C(H3F3C)                             | NM_001013699 | 100.1 | 119.8  | 0.03247 | 1.156 | NM_001191088 | 10.07   | 0.03 |
| H6PD     | hexose-6-phosphate dehydrogenase/glucose 1-dehydrogenase(H6PD) | NM_004285    | 103.7 | 114.7  | 0.03247 | 1.156 |              |         |      |
| PCBP3    | poly(rC) binding protein 3(PCBP3)                              | NM_020528    | 148.1 | 134.5  | 0.0325  | 0.867 |              |         |      |
| SLC10A7  | solute carrier family 10 member 7(SLC10A7)                     | NM_001029998 | 103.4 | 112.9  | 0.03264 | 1.15  |              |         |      |
| SLC10A7  | solute carrier family 10 member 7(SLC10A7)                     | NM_001029998 | 125.2 | 152.1  | 0.03264 | 1.15  | NM_012496    | 1095.39 | 8.76 |
|          |                                                                | XM_001125904 | 126.9 | 168.5  | 0.03274 | 1.239 |              |         |      |
|          |                                                                | XM_927568    | 118.9 | 112    | 0.03275 | 0.891 |              |         |      |
| SNORA14B | small nucleolar RNA, H/ACA box 14B(SNORA14B)                   | NR_002956    | 106.5 | 124.6  | 0.03278 | 1.103 |              |         |      |
|          |                                                                | XM_926372    | 112.8 | 102.5  | 0.03282 | 0.871 |              |         |      |
| APPBP2   | amyloid beta precursor protein binding protein 2(APPBP2)       | NM_006380    | 977.2 | 2039.5 | 0.03291 | 1.862 |              |         |      |
| APP      | amyloid beta precursor protein(APP)                            | NM_201414    | 658.1 | 1613.9 | 0.03291 | 1.862 |              |         |      |
| ARMCX3   | armadillo repeat containing, X-linked 3(ARMCX3)                | NM_177947    | 278.8 | 350    | 0.03296 | 1.32  |              |         |      |

|        |                                                                     |              |       |        |         |       |
|--------|---------------------------------------------------------------------|--------------|-------|--------|---------|-------|
| ARMCX3 | armadillo repeat containing, X-linked 3(ARMCX3)                     | NM_177948    | 343.6 | 527.9  | 0.03296 | 1.32  |
| TUBB4A | tubulin beta 4A class IVa(TUBB4A)                                   | NM_006087    | 171.7 | 154.1  | 0.03321 | 0.84  |
| PASK   | PAS domain containing serine/threonine kinase(PASK)                 | NM_015148    | 114   | 137.2  | 0.03337 | 1.143 |
| PASK   | PAS domain containing serine/threonine kinase(PASK)                 | NM_015148    | 160   | 181.6  | 0.03337 | 1.143 |
| CLSTN1 | calsyntenin 1(CLSTN1)                                               | NM_001009566 | 107.6 | 129.2  | 0.03337 | 1.142 |
| CLSTN1 | calsyntenin 1(CLSTN1)                                               | NM_001009566 | 123.5 | 152.2  | 0.03337 | 1.142 |
| CLSTN1 | calsyntenin 1(CLSTN1)                                               | NM_001009566 | 2058  | 2595.3 | 0.03337 | 1.142 |
|        |                                                                     | XM_930029    | 348.7 | 287.2  | 0.03353 | 0.73  |
| NUMBL  | NUMB like, endocytic adaptor protein(NUMBL)                         | NM_004756    | 94.2  | 109.7  | 0.03374 | 1.124 |
| APRT   | adenine phosphoribosyltransferase(APRT)                             | NM_000485    | 265.9 | 407.6  | 0.03376 | 1.315 |
| NPIP13 | nuclear pore complex interacting protein family, member B13(NPIP13) | NR_002555    | 209   | 172.2  | 0.03407 | 0.769 |
| DDX5   | DEAD-box helicase 5(DDX5)                                           | NM_004396    | 217.9 | 303.9  | 0.03409 | 1.215 |

|               |                                                              |                  |       |        |         |       |
|---------------|--------------------------------------------------------------|------------------|-------|--------|---------|-------|
| SELENO<br>S   | selenoprotein<br>S(SELENOS)                                  | NM_0184<br>45    | 167.6 | 266.4  | 0.03411 | 1.38  |
| SELENO<br>S   | selenoprotein<br>S(SELENOS)                                  | NM_0184<br>45    | 911.9 | 1149.3 | 0.03411 | 1.38  |
| CCDC25        | coiled-coil domain<br>containing 25(CCDC25)                  | NM_0182<br>46    | 117   | 176.1  | 0.03412 | 1.34  |
| CCDC28<br>A   | coiled-coil domain<br>containing<br>28A(CCDC28A)             | NM_0154<br>39    | 280.8 | 296.2  | 0.03412 | 1.34  |
|               |                                                              | XM_93327<br>7    | 112   | 105.3  | 0.03414 | 0.896 |
|               |                                                              | XM_93770<br>6    | 375.2 | 306.2  | 0.03416 | 0.724 |
|               |                                                              | XM_00112<br>9527 | 218.6 | 388.6  | 0.03418 | 1.568 |
| INHBC         | inhibin beta C<br>subunit(INHBC)                             | NM_0055<br>38    | 109.7 | 133.3  | 0.03419 | 1.173 |
| ANO1          | anoctamin 1(ANO1)                                            | NM_0180<br>43    | 112.4 | 167.9  | 0.03426 | 1.329 |
| ANO10         | anoctamin 10(ANO10)                                          | NM_0180<br>75    | 116.6 | 168.9  | 0.03426 | 1.329 |
| SNHG3         | small nucleolar RNA<br>host gene 3(SNHG3)                    | NR_00290<br>9    | 120.3 | 112.3  | 0.0343  | 0.897 |
| LINC009<br>50 | long intergenic non-<br>protein coding RNA<br>950(LINC00950) | NR_02400<br>6    | 122.7 | 112.3  | 0.03435 | 0.87  |
| SUPT3H        | SPT3 homolog, SAGA<br>and STAGA complex<br>component(SUPT3H) | NM_1813<br>56    | 105.8 | 132.3  | 0.03445 | 1.191 |

|          |                                                         |           |       |       |         |       |           |       |      |
|----------|---------------------------------------------------------|-----------|-------|-------|---------|-------|-----------|-------|------|
| PLA2G2D  | phospholipase A2 group IID(PLA2G2D)                     | NM_012400 | 103.8 | 98.5  | 0.03448 | 0.902 |           |       |      |
| PLA2G2D  | phospholipase A2 group IID(PLA2G2D)                     | NM_012400 | 457.9 | 475.7 | 0.03448 | 0.902 |           |       |      |
| AAMDC    | adipogenesis associated Mth938 domain containing(AAMDC) | NM_024684 | 122.9 | 125.6 | 0.0346  | 1.123 |           |       |      |
| AAK1     | AP2 associated kinase 1(AAK1)                           | NM_014911 | 104.7 | 123.6 | 0.0346  | 1.123 |           |       |      |
| SSBP2    | single stranded DNA binding protein 2(SSBP2)            | NM_012446 | 312.9 | 513.6 | 0.03464 | 1.437 |           |       |      |
| SPTY2D1  | SPT2 chromatin protein domain containing 1(SPTY2D1)     | NM_194285 | 111.3 | 140.2 | 0.03469 | 1.191 |           |       |      |
| C1orf162 | chromosome 1 open reading frame 162(C1orf162)           | NM_174896 | 142.2 | 129   | 0.03471 | 0.866 |           |       |      |
| THOC7    | THO complex 7(THOC7)                                    | NM_025075 | 495.7 | 685   | 0.03473 | 1.198 |           |       |      |
| PCDHGA10 | protocadherin gamma subfamily A, 10(PCDHGA10)           | NM_032090 | 117.9 | 141.5 | 0.03496 | 1.149 |           |       |      |
|          |                                                         | NM_058183 | 97.7  | 115.6 | 0.03498 | 1.127 |           |       |      |
|          |                                                         | XM_942687 | 128.6 | 164.4 | 0.03501 | 1.218 | NM_013059 | 21.02 | 0.11 |
|          |                                                         | XM_942687 | 160.6 | 189.5 | 0.03501 | 1.218 |           |       |      |

|         |                                                                   |              |        |       |         |       |
|---------|-------------------------------------------------------------------|--------------|--------|-------|---------|-------|
| SLC7A8  | solute carrier family 7 member 8(SLC7A8)                          | NM_182728    | 87.1   | 101.3 | 0.03503 | 1.126 |
| SLC7A8  | solute carrier family 7 member 8(SLC7A8)                          | NM_182728    | 295.1  | 183.7 | 0.03503 | 1.126 |
| MAP2K3  | mitogen-activated protein kinase kinase 3(MAP2K3)                 | NM_002756    | 118.9  | 101.4 | 0.03505 | 0.846 |
|         |                                                                   | XM_932354    | 142.7  | 130.1 | 0.03512 | 0.874 |
| MLXIPL  | MLX interacting protein like(MLXIPL)                              | NM_032953    | 1590.4 | 709.9 | 0.03513 | 0.394 |
| FBXO11  | F-box protein 11(FBXO11)                                          | NM_025133    | 351.7  | 461.9 | 0.03518 | 1.215 |
| FBXO15  | F-box protein 15(FBXO15)                                          | NM_152676    | 514.1  | 726.3 | 0.03518 | 1.215 |
| BRINP3  | BMP/retinoic acid inducible neural specific 3(BRINP3)             | NM_199051    | 102.6  | 173.8 | 0.03519 | 1.557 |
| PLEKHH2 | pleckstrin homology, MyTH4 and FERM domain containing H2(PLEKHH2) | NM_172069    | 146.6  | 195.1 | 0.03523 | 1.261 |
| DNAJC10 | DnaJ heat shock protein family (Hsp40) member C10(DNAJC10)        | NM_018981    | 146.3  | 185   | 0.03526 | 1.163 |
|         |                                                                   | NM_001013840 | 122.3  | 145.6 | 0.03533 | 1.127 |
|         |                                                                   | NM_001013840 | 130.5  | 147.3 | 0.03533 | 1.127 |



|         |                                                      |              |        |       |         |       |           |       |      |
|---------|------------------------------------------------------|--------------|--------|-------|---------|-------|-----------|-------|------|
| NECAB3  | N-terminal EF-hand calcium binding protein 3(NECAB3) | NM_031231    | 124    | 115   | 0.03539 | 0.868 | NM_012816 | 19.78 | 2.28 |
| FAM30A  | family with sequence similarity 30, member A(FAM30A) | NM_014792    | 95     | 112.5 | 0.0354  | 1.134 | NM_012816 | 19.78 | 2.28 |
|         |                                                      | AW664435     | 110.1  | 103.1 | 0.03543 | 0.864 |           |       |      |
|         |                                                      | XM_001715935 | 426.2  | 210.4 | 0.03552 | 0.451 |           |       |      |
| MT1IP   | metallothionein 1I, pseudogene(MT1IP)                | NM_175621    | 1855.3 | 812.8 | 0.03556 | 0.385 |           |       |      |
| ABAT    | 4-aminobutyrate aminotransferase(ABAT)               | NM_000663    | 131.5  | 137.6 | 0.03556 | 0.888 |           |       |      |
| AATK    | apoptosis associated tyrosine kinase(AATK)           | NM_001080395 | 121.1  | 112.4 | 0.03556 | 0.888 |           |       |      |
| HOXA5   | homeobox A5(HOXA5)                                   | NM_019102    | 124.7  | 164.9 | 0.03566 | 1.234 |           |       |      |
| MVB12B  | multivesicular body subunit 12B(MVB12B)              | NM_033446    | 108.1  | 145.9 | 0.03576 | 1.257 |           |       |      |
| TAGLN3  | transgelin 3(TAGLN3)                                 | NM_001008273 | 116.1  | 108.1 | 0.03579 | 0.903 |           |       |      |
| DECR1   | 2,4-dienoyl-CoA reductase 1, mitochondrial(DECR1)    | NM_001359    | 121.4  | 155   | 0.03583 | 1.194 |           |       |      |
| SLC5A3  | solute carrier family 5 member 3(SLC5A3)             | AK055913     | 98.8   | 128.4 | 0.03587 | 1.247 |           |       |      |
| RSPH10B | radial spoke head 10 homolog B(RSPH10B)              | NM_173565    | 101    | 96.7  | 0.03593 | 1.309 |           |       |      |

|              |                                                                |               |        |        |         |       |               |               |
|--------------|----------------------------------------------------------------|---------------|--------|--------|---------|-------|---------------|---------------|
| RSPH10<br>B  | radial spoke head 10<br>homolog B(RSPH10B)                     | NM_1735<br>65 | 125.9  | 182.1  | 0.03593 | 1.309 |               |               |
| RSPH10<br>B  | radial spoke head 10<br>homolog B(RSPH10B)                     | NM_1735<br>65 | 137.5  | 227.6  | 0.03593 | 1.309 |               |               |
| RSPH10<br>B  | radial spoke head 10<br>homolog B(RSPH10B)                     | NM_1735<br>65 | 142.1  | 189.9  | 0.03593 | 1.309 |               |               |
| APOD         | apolipoprotein D(APOD)<br>junction                             | NM_0016<br>47 | 105.5  | 125.9  | 0.03605 | 1.134 |               |               |
| JUP          | plakoglobin(JUP)                                               | NM_0022<br>30 | 106.2  | 155.1  | 0.03606 | 1.387 |               |               |
| ALPPL2       | alkaline phosphatase,<br>placental like<br>2(ALPPL2)           | NM_0313<br>13 | 2121.6 | 1017.4 | 0.03611 | 0.405 |               |               |
| SNTA1        | syntrophin alpha<br>1(SNTA1)                                   | NM_0030<br>98 | 221.5  | 198    | 0.03626 | 0.821 |               |               |
| FAM124<br>A  | family with sequence<br>similarity 124 member<br>A(FAM124A)    | NM_1450<br>19 | 118.4  | 112.8  | 0.03626 | 0.92  |               |               |
|              |                                                                | XR_03838<br>0 | 532    | 436    | 0.03629 | 0.714 |               |               |
|              |                                                                | XM_92713<br>6 | 104.8  | 123    | 0.03638 | 1.117 | NM_031<br>544 | 4.79<br>38.59 |
| C11ORF<br>49 | chromosome 11 open<br>reading frame<br>49(C11orf49)            | NM_0241<br>13 | 105.1  | 98     | 0.0366  | 0.889 | NM_031<br>544 | 4.79<br>38.59 |
| ANGPTL<br>3  | angiopoietin like<br>3(ANGPTL3)                                | NM_0144<br>95 | 91.2   | 132.8  | 0.03662 | 1.391 |               |               |
| RABGGT<br>A  | Rab<br>geranylgeranyltransfera<br>se alpha<br>subunit(RABGGTA) | NM_1828<br>36 | 93.8   | 112.5  | 0.03674 | 1.173 |               |               |

|          |                                                             |              |         |         |         |       |
|----------|-------------------------------------------------------------|--------------|---------|---------|---------|-------|
|          |                                                             | XM_37887     |         |         |         |       |
|          |                                                             | 6            | 127.6   | 120.8   | 0.03679 | 0.892 |
|          |                                                             | AW05197      |         |         |         |       |
|          |                                                             | 8            | 132.7   | 126.6   | 0.03685 | 0.903 |
|          | chromosome 16 open reading frame                            | NM_1735      |         |         |         |       |
| c16orf52 | 52(C16orf52)                                                | 01           | 108.6   | 125.1   | 0.03687 | 1.121 |
|          | ATPase phospholipid transporting 8B4                        | NM_0248      |         |         |         |       |
| ATP8B4   | (putative)(ATP8B4)                                          | 37           | 139     | 130.6   | 0.03691 | 0.877 |
| CSNK2A1  | casein kinase 2 alpha 1(CSNK2A1)                            | NM_001895    | 133.1   | 194.4   | 0.03697 | 1.316 |
| CSNK2A2  | casein kinase 2 alpha 2(CSNK2A2)                            | NM_001896    | 270     | 294.8   | 0.03697 | 1.316 |
|          | nuclear casein kinase and cyclin dependent kinase substrate |              |         |         |         |       |
| NUCKS1   | 1(NUCKS1)                                                   | AK095855     | 1253.8  | 1798.2  | 0.03699 | 1.26  |
|          |                                                             | XM_001723239 | 13523.8 | 16849.9 | 0.03706 | 1.176 |
|          | dual specificity phosphatase                                | NM_0201      |         |         |         |       |
| DUSP22   | 22(DUSP22)                                                  | 85           | 118.8   | 173     | 0.03711 | 1.35  |
|          | dual specificity phosphatase                                | NM_0178      |         |         |         |       |
| DUSP23   | 23(DUSP23)                                                  | 23           | 177.7   | 290.6   | 0.03711 | 1.35  |
| ILF3     | interleukin enhancer binding factor 3(ILF3)                 | NM_012218    | 307.4   | 481.7   | 0.03712 | 1.378 |
| PCGF1    | polycomb group ring finger 1(PCGF1)                         | NM_032673    | 144.5   | 182.6   | 0.03728 | 1.136 |

|           |                                                               |                       |        |        |         |       |
|-----------|---------------------------------------------------------------|-----------------------|--------|--------|---------|-------|
| DYNLRB1   | dynein light chain roadblock-type 1(DYNLRB1)                  | NM_014183             | 1232.5 | 2157.6 | 0.0373  | 1.567 |
| SYTL2     | synaptotagmin like 2(SYTL2)                                   | NM_206928             | 149.7  | 221.5  | 0.0373  | 1.32  |
| STXBP4    | syntaxin binding protein 4(STXBP4)                            | NM_178509             | 104.3  | 137.7  | 0.03735 | 1.232 |
| SPTLC1    | serine palmitoyltransferase long chain base subunit 1(SPTLC1) | NM_006415             | 120    | 150.5  | 0.03752 | 1.193 |
| TNC       | tenascin C(TNC)                                               | NM_002160             | 118.4  | 248.5  | 0.03754 | 1.897 |
| TNC       | tenascin C(TNC)                                               | NM_002160             | 128.4  | 274.8  | 0.03754 | 1.897 |
| RAB11FIP2 | RAB11 family interacting protein 2(RAB11FIP2)                 | NM_014904             | 202.9  | 342.1  | 0.03765 | 1.378 |
| RAB11FIP2 | RAB11 family interacting protein 2(RAB11FIP2)                 | NM_014904             | 250.6  | 399.4  | 0.03765 | 1.378 |
| LOC372028 | uncharacterized LOC105372028(LOC105372028)                    | DA128369              | 111.1  | 102.8  | 0.03765 | 0.893 |
| SIRT6     | sirtuin 6(SIRT6)                                              | BQ021435<br>NM_016539 | 121.2  | 113.1  | 0.03773 | 0.89  |
| CNIH2     | cornichon family AMPA receptor auxiliary protein 2(CNIH2)     | NM_182553             | 142.2  | 123.1  | 0.03774 | 0.826 |
|           |                                                               |                       | 260.4  | 346.5  | 0.03775 | 1.302 |

|       |                                                           |              |       |       |         |       |
|-------|-----------------------------------------------------------|--------------|-------|-------|---------|-------|
| CNIH1 | cornichon family AMPA receptor auxiliary protein 1(CNIH1) | NM_005776    | 202.1 | 301.9 | 0.03775 | 1.302 |
| VWA1  | von Willebrand factor A domain containing 1(VWA1)         | NM_199121    | 106.7 | 100.5 | 0.03777 | 0.886 |
| TPM1  | tropomyosin 1 (alpha)(TPM1)                               | NM_001018008 | 108.4 | 139   | 0.0378  | 1.199 |
| TPM1  | tropomyosin 1 (alpha)(TPM1)                               | NM_001018008 | 109.7 | 138.8 | 0.0378  | 1.199 |
| CD14  | CD14 molecule(CD14)                                       | NM_001040021 | 116.6 | 145.8 | 0.03783 | 1.17  |
|       |                                                           | XR_017376    | 95.8  | 117.6 | 0.03787 | 1.202 |
|       |                                                           | XR_017376    | 127.2 | 134.8 | 0.03787 | 1.202 |
| PKM   | pyruvate kinase, muscle(PKM)                              | NM_182470    | 180.2 | 326.4 | 0.03789 | 1.586 |
| DHCR7 | 7-dehydrocholesterol reductase(DHCR7)                     | NM_001360    | 105.3 | 134   | 0.03791 | 1.205 |
| DHDDS | dehydrodolichyl diphosphate synthase subunit(DHDDS)       | NM_024887    | 164   | 196.9 | 0.03791 | 1.205 |
| FGG   | fibrinogen gamma chain(FGG)                               | NM_000509    | 385.4 | 236.6 | 0.03808 | 0.551 |
| ZFAT  | zinc finger and AT-hook domain containing(ZFAT)           | NM_001029939 | 133.6 | 116.7 | 0.03809 | 0.818 |

|              |                                                                   |                  |        |        |         |       |
|--------------|-------------------------------------------------------------------|------------------|--------|--------|---------|-------|
|              | mitogen-activated<br>protein kinase kinase<br>kinase kinase       | NM_1456          |        |        |         |       |
| map4k4       | 4(MAP4K4)                                                         | 87               | 212.7  | 330.9  | 0.03818 | 1.324 |
|              | spermine<br>oxidase(SMOX)                                         | NM_1758          |        |        |         |       |
| SMOX         | 42                                                                | 42               | 108.9  | 121.2  | 0.03821 | 0.769 |
|              | spermine<br>oxidase(SMOX)                                         | NM_1758          |        |        |         |       |
| SMOX         | 42                                                                | 42               | 204.4  | 168.1  | 0.03821 | 0.769 |
| ARHGA<br>P28 | Rho GTPase activating<br>protein 28(ARHGAP28)                     | NM_0306<br>72    | 116.5  | 106.3  | 0.03831 | 0.874 |
|              | charged multivesicular<br>body protein 5(CHMP5)                   | NM_0164<br>10    | 217.8  | 321.6  | 0.03832 | 1.439 |
| CHMP5        | 10                                                                | 10               | 369.6  | 623.7  | 0.03832 | 1.439 |
|              | charged multivesicular<br>body protein 5(CHMP5)                   | NM_0164<br>10    | 1042.1 | 1140.5 | 0.03832 | 1.439 |
| CHMP5        | 10                                                                | 0                | 121.2  | 109.9  | 0.03833 | 0.874 |
|              | sortilin related VPS10<br>domain containing<br>receptor 2(SORCS2) | NM_0207<br>77    | 92.2   | 141.6  | 0.0384  | 1.451 |
| SORCS2       | 77                                                                | 77               | 119.7  | 160.1  | 0.03841 | 1.498 |
|              | kelch like family member<br>5(KLHL5)                              | NM_0010<br>07075 | 133.1  | 132.3  | 0.03841 | 1.498 |
| KLHL5        | 07075                                                             | 07075            | 401.5  | 695.6  | 0.03841 | 1.498 |
|              | kelch like family member<br>5(KLHL5)                              | NM_0010<br>07075 | 147.6  | 189.4  | 0.03843 | 1.192 |
| KLHL5        | 07075                                                             | 97               |        |        |         |       |
|              | ubiquitin like modifier<br>activating enzyme<br>3(UBA3)           | NM_1981<br>97    |        |        |         |       |
| UBA3         | 97                                                                |                  |        |        |         |       |

|          |                                                                  |                  |       |       |         |       |
|----------|------------------------------------------------------------------|------------------|-------|-------|---------|-------|
| PCYT2    | phosphate<br>cytidyltransferase 2,<br>ethanolamine(PCYT2)        | NM_0028<br>61    | 161.6 | 142.2 | 0.03852 | 0.821 |
| EFS      | embryonal Fyn-<br>associated<br>substrate(EFS)                   | NM_0324<br>59    | 87    | 108.4 | 0.03855 | 1.219 |
| HYLS1    | HYLS1, centriolar and<br>ciliogenesis<br>associated(HYLS1)       | NM_1450<br>14    | 242.1 | 208.1 | 0.03856 | 0.771 |
| c12orf73 | chromosome 12 open<br>reading frame<br>73(C12orf73)              | NM_0011<br>35570 | 99.3  | 115.3 | 0.03857 | 1.112 |
| CFH      | complement factor<br>H(CFH)                                      | NM_0010<br>14975 | 98.3  | 116.7 | 0.03872 | 1.512 |
| CFH      | complement factor<br>H(CFH)                                      | NM_0010<br>14975 | 109.6 | 183.6 | 0.03872 | 1.512 |
| CFH      | complement factor<br>H(CFH)                                      | NM_0010<br>14975 | 111.8 | 131.7 | 0.03872 | 1.512 |
| MAP1A    | microtubule associated<br>protein 1A(MAP1A)                      | NM_0023<br>73    | 117.1 | 159.4 | 0.0388  | 1.248 |
|          |                                                                  | BU622756         | 122.1 | 118.7 | 0.03894 | 0.903 |
| MTFMT    | mitochondrial methionyl-<br>tRNA<br>formyltransferase(MTFM<br>T) | NM_1392<br>42    | 136.7 | 124.5 | 0.03904 | 0.865 |
| MTFMT    | mitochondrial methionyl-<br>tRNA<br>formyltransferase(MTFM<br>T) | NM_1392<br>42    | 184   | 212.3 | 0.03904 | 0.865 |

|        |                                                                 |                  |       |       |         |       |
|--------|-----------------------------------------------------------------|------------------|-------|-------|---------|-------|
| MOAP1  | modulator of apoptosis<br>1(MOAP1)                              | NM_0221<br>51    | 116.8 | 149.8 | 0.0391  | 1.191 |
|        |                                                                 | XM_94186<br>1    | 259.1 | 350.4 | 0.03912 | 1.18  |
|        |                                                                 | XM_93557<br>5    | 104.3 | 129.7 | 0.0393  | 1.202 |
| MKRN2  | makorin ring finger<br>protein 2(MKRN2)                         | NM_0141<br>60    | 227.6 | 334.8 | 0.03931 | 1.298 |
| VCL    | vinculin(VCL)                                                   | NM_0033<br>73    | 139.4 | 198.9 | 0.03935 | 1.298 |
| TH     | tyrosine<br>hydroxylase(TH)                                     | NM_1992<br>93    | 96.2  | 113.9 | 0.03936 | 1.145 |
| bcam   | basal cell adhesion<br>molecule (Lutheran<br>blood group)(BCAM) | NM_0055<br>81    | 112   | 119.4 | 0.03939 | 1.197 |
| BCAP29 | B-cell receptor<br>associated protein<br>29(BCAP29)             | NM_0010<br>08405 | 120.5 | 152.8 | 0.03939 | 1.197 |
| ORC1   | origin recognition<br>complex subunit<br>1(ORC1)                | NM_0041<br>53    | 118.4 | 141.4 | 0.03942 | 1.142 |
| CFAP69 | cilia and flagella<br>associated protein<br>69(CFAP69)          | NM_0010<br>39706 | 109.5 | 105.8 | 0.03943 | 0.912 |
| RREB1  | ras responsive element<br>binding protein<br>1(RREB1)           | NM_0010<br>03699 | 113.2 | 108   | 0.03947 | 0.898 |
| RREB1  | ras responsive element<br>binding protein<br>1(RREB1)           | NM_0010<br>03699 | 116.1 | 114.1 | 0.03947 | 0.898 |



|       |                                                                     |              |       |       |         |       |
|-------|---------------------------------------------------------------------|--------------|-------|-------|---------|-------|
| RREB1 | ras responsive element binding protein 1(RREB1)                     | NM_00103699  | 118.3 | 138.9 | 0.03947 | 0.898 |
| RREB1 | ras responsive element binding protein 1(RREB1)                     | NM_00103699  | 144.7 | 152.1 | 0.03947 | 0.898 |
| EIF5  | eukaryotic translation initiation factor 5(EIF5)                    | NM_001969    | 200.8 | 318.6 | 0.0395  | 1.387 |
| MMS19 | MMS19 homolog, cytosolic iron-sulfur assembly component(MMS19)      | NM_022362    | 309.1 | 420.5 | 0.03954 | 1.28  |
| MMS19 | MMS19 homolog, cytosolic iron-sulfur assembly component(MMS19)      | NM_022362    | 351.4 | 516.4 | 0.03954 | 1.28  |
| FXVD1 | FXVD domain containing ion transport regulator 1(FXVD1)             | NM_021902    | 148.8 | 122.1 | 0.03956 | 0.786 |
| FXVD1 | FXVD domain containing ion transport regulator 1(FXVD1)             | NM_005031    | 103.2 | 102.9 | 0.03956 | 0.786 |
|       |                                                                     | XM_001714161 | 145.7 | 133.1 | 0.03964 | 0.862 |
| ERCC8 | ERCC excision repair 8, CSA ubiquitin ligase complex subunit(ERCC8) | NM_000082    | 127.1 | 151.5 | 0.03993 | 1.138 |

|             |                                                                     |                  |        |        |         |       |
|-------------|---------------------------------------------------------------------|------------------|--------|--------|---------|-------|
| ERCC4       | ERCC excision repair 4,<br>endonuclease catalytic<br>subunit(ERCC4) | NM_0052<br>36    | 91.9   | 107.8  | 0.03993 | 1.138 |
|             |                                                                     | XM_00112<br>6750 | 93.7   | 107.4  | 0.03996 | 1.116 |
|             |                                                                     | XM_00112<br>6750 | 116.2  | 172    | 0.03996 | 1.116 |
| DZANK1      | double zinc ribbon and<br>ankyrin repeat domains<br>1(DZANK1)       | NM_0010<br>99407 | 102.2  | 126.3  | 0.04004 | 1.181 |
|             |                                                                     | BM705347         | 108.7  | 98.5   | 0.04007 | 0.865 |
| AKT1        | AKT serine/threonine<br>kinase 1(AKT1)                              | NM_0010<br>14432 | 7980.7 | 3741.1 | 0.0401  | 0.397 |
| TMEM21<br>9 | transmembrane protein<br>219(TMEM219)                               | NM_0010<br>83613 | 448.4  | 433    | 0.04012 | 0.833 |
|             |                                                                     | CN283269         | 135    | 131    | 0.04023 | 0.925 |
| ACTL6A      | actin like 6A(ACTL6A)                                               | NM_0043<br>01    | 697.6  | 1184.4 | 0.04033 | 1.478 |
|             |                                                                     | XM_94347<br>2    | 96.5   | 112.8  | 0.04063 | 1.104 |
|             |                                                                     | BX441478         | 90.2   | 106.8  | 0.04063 | 1.155 |
| TMEM64      | transmembrane protein<br>64(TMEM64)                                 | AK095472         | 126.3  | 167.1  | 0.04065 | 1.211 |
| SORL1       | sortilin related receptor<br>1(SORL1)                               | NM_0031<br>05    | 152    | 340.2  | 0.04066 | 1.952 |
| ODF2        | outer dense fiber of<br>sperm tails 2(ODF2)                         | NM_0025<br>40    | 93.2   | 113.4  | 0.04071 | 1.178 |

|        |                                                       |              |        |        |         |       |           |       |       |
|--------|-------------------------------------------------------|--------------|--------|--------|---------|-------|-----------|-------|-------|
| ODF2   | outer dense fiber of sperm tails 2(ODF2)              | NM_002540    | 170.7  | 226.7  | 0.04071 | 1.178 |           |       |       |
| cyp4f3 | cytochrome P450 family 4 subfamily F member 3(CYP4F3) | NM_000896    | 1010.8 | 413.5  | 0.04089 | 0.351 |           |       |       |
|        |                                                       | XM_001725366 | 122.9  | 156.8  | 0.04093 | 1.188 |           |       |       |
| RBP1   | retinol binding protein 1(RBP1)                       | NM_002899    | 169.5  | 313.5  | 0.04103 | 1.598 |           |       |       |
|        |                                                       | XR_017130    | 1504   | 2336.1 | 0.04106 | 1.365 |           |       |       |
| PTK7   | protein tyrosine kinase 7 (inactive)(PTK7)            | NM_152880    | 129.3  | 206.9  | 0.04107 | 1.45  |           |       |       |
| UBQLN1 | ubiquilin 1(UBQLN1)                                   | NM_053067    | 140.8  | 183.7  | 0.04107 | 1.189 |           |       |       |
| UBQLN1 | ubiquilin 1(UBQLN1)                                   | NM_053067    | 268.7  | 364.1  | 0.04107 | 1.189 |           |       |       |
| EXOC7  | exocyst complex component 7(EXOC7)                    | NM_001013839 | 175.7  | 251.2  | 0.0411  | 1.26  | NM_031012 | 19.39 | 0.85  |
|        |                                                       | XR_001336    | 121.5  | 110.1  | 0.04112 | 0.876 |           |       |       |
| CDKL1  | cyclin dependent kinase like 1(CDKL1)                 | NM_004196    | 105    | 127.6  | 0.04113 | 1.137 |           |       |       |
| SCRT1  | scratch family transcriptional repressor 1(SCRT1)     | NM_031309    | 152    | 142.7  | 0.04125 | 0.891 |           |       |       |
| MAU2   | MAU2 sister chromatid cohesion factor(MAU2)           | NM_015329    | 119.3  | 115.2  | 0.04125 | 0.925 | NM_012904 | 10.16 | 55.22 |
| PRMT6  | protein arginine methyltransferase 6(PRMT6)           | NM_018137    | 159.9  | 211    | 0.04125 | 1.188 |           |       |       |

|         |                                                                                   |           |       |       |         |       |           |       |      |
|---------|-----------------------------------------------------------------------------------|-----------|-------|-------|---------|-------|-----------|-------|------|
| PRMT6   | protein arginine methyltransferase 6(PRMT6)                                       | NM_018137 | 217.9 | 271.8 | 0.04125 | 1.188 |           |       |      |
| COPRS   | coordinator of PRMT5 and differentiation stimulator(COPRS)                        | NM_018405 | 104.3 | 122   | 0.04128 | 1.129 |           |       |      |
| CUL7    | cullin 7(CUL7)                                                                    | NM_014780 | 374.7 | 374.2 | 0.04129 | 0.867 |           |       |      |
| ecd     | ecdysoneless cell cycle regulator(ECD)                                            | NM_007265 | 106.6 | 133.6 | 0.04145 | 1.156 |           |       |      |
| ECEL1   | endothelin converting enzyme like 1(ECEL1)                                        | NM_004826 | 106.8 | 133.1 | 0.04145 | 1.156 |           |       |      |
| KCNMB2  | potassium calcium-activated channel subfamily M regulatory beta subunit 2(KCNMB2) | NM_181361 | 117.7 | 109.4 | 0.0415  | 0.85  |           |       |      |
| KCNMB2  | potassium calcium-activated channel subfamily M regulatory beta subunit 2(KCNMB2) | NM_005832 | 107.7 | 106.4 | 0.0415  | 0.85  |           |       |      |
| TBC1D8B | TBC1 domain family member 8B(TBC1D8B)                                             | NM_017752 | 111.7 | 114   | 0.04165 | 1.176 |           |       |      |
| TBC1D8B | TBC1 domain family member 8B(TBC1D8B)                                             | NM_017752 | 129.1 | 166.3 | 0.04165 | 1.176 |           |       |      |
|         |                                                                                   | XM_927939 | 129.4 | 155   | 0.04183 | 1.142 |           |       |      |
|         |                                                                                   | XM_934270 | 103.3 | 121.2 | 0.04184 | 1.132 | NM_012823 | 17.52 | 0.04 |

|             |                                                        |                  |        |        |         |       |
|-------------|--------------------------------------------------------|------------------|--------|--------|---------|-------|
|             |                                                        | NM_1782<br>30    | 2370.4 | 3782.8 | 0.04191 | 1.398 |
|             | VENT homeobox<br>pseudogene                            |                  |        |        |         |       |
| VENTXP<br>1 | 1(VENTXP1)                                             | NR_00155<br>9    | 112.7  | 119.1  | 0.04199 | 0.889 |
|             | VENT homeobox<br>pseudogene                            |                  |        |        |         |       |
| VENTXP<br>1 | 1(VENTXP1)                                             | NR_00155<br>9    | 118.7  | 111.3  | 0.04199 | 0.889 |
|             | myeloid associated<br>differentiation<br>marker(MYADM) |                  |        |        |         |       |
| MYADM       |                                                        | NM_0010<br>20820 | 623.5  | 1205.7 | 0.04203 | 1.735 |
| SLC5A1<br>0 | solute carrier family 5<br>member 10(SLC5A10)          | NM_1523<br>51    | 131.7  | 109.5  | 0.04208 | 0.552 |
| SLC5A1<br>0 | solute carrier family 5<br>member 10(SLC5A10)          | NM_1523<br>51    | 244.8  | 147.2  | 0.04208 | 0.552 |
| PPT2        | palmitoyl-protein<br>thioesterase 2(PPT2)              | NM_1387<br>17    | 97.6   | 115    | 0.0421  | 1.156 |
| PPT2        | palmitoyl-protein<br>thioesterase 2(PPT2)              | NM_1387<br>17    | 172.1  | 220.5  | 0.0421  | 1.156 |
|             |                                                        | XM_00171<br>6173 | 134.1  | 114.2  | 0.0421  | 0.784 |
|             |                                                        | XM_00172<br>2148 | 130.6  | 117.1  | 0.04219 | 0.861 |
| ZNF423      | zinc finger protein<br>423(ZNF423)                     | NM_0150<br>69    | 105    | 118.2  | 0.04221 | 1.274 |
| ZNF423      | zinc finger protein<br>423(ZNF423)                     | NM_0150<br>69    | 128.5  | 177.2  | 0.04221 | 1.274 |
|             |                                                        | XM_11397<br>1    | 141.6  | 208.4  | 0.04226 | 1.312 |

|                |                                                               |                  |        |        |         |       |
|----------------|---------------------------------------------------------------|------------------|--------|--------|---------|-------|
| WIPI2          | WD repeat domain,<br>phosphoinositide<br>interacting 2(WIPI2) | NM_0160<br>03    | 258.2  | 199.3  | 0.04226 | 0.689 |
|                |                                                               | XM_00112<br>6128 | 117.8  | 108.1  | 0.04231 | 0.884 |
| EWSR1          | EWS RNA binding<br>protein 1(EWSR1)                           | NM_0139<br>86    | 765.4  | 1037   | 0.04238 | 1.34  |
| EWSR1          | EWS RNA binding<br>protein 1(EWSR1)                           | NM_0052<br>43    | 464.8  | 719.9  | 0.04238 | 1.34  |
| ZMYM5          | zinc finger MYM-type<br>containing 5(ZMYM5)                   | NM_0010<br>39650 | 113.5  | 135    | 0.04239 | 1.143 |
| CALML3-<br>AS1 | CALML3 antisense RNA<br>1(CALML3-AS1)                         | AL831877         | 3392.2 | 2742.2 | 0.04246 | 0.697 |
| F7             | coagulation factor<br>VII(F7)                                 | NM_0001<br>31    | 92.9   | 107.1  | 0.04254 | 1.124 |
| bola2          | bolA family member<br>2(BOLA2)                                | NM_0010<br>31827 | 107    | 130.3  | 0.04255 | 1.161 |
| bola2          | bolA family member<br>2(BOLA2)                                | NM_0010<br>31827 | 108.1  | 112.6  | 0.04255 | 1.161 |
| bola2          | bolA family member<br>2(BOLA2)                                | NM_0010<br>31827 | 197.4  | 255.1  | 0.04255 | 1.161 |
| bola2          | bolA family member<br>2(BOLA2)                                | NM_0010<br>31827 | 539.5  | 624.5  | 0.04255 | 1.161 |
|                |                                                               | XM_92725<br>6    | 113.3  | 102    | 0.04261 | 0.876 |
|                |                                                               | XM_00172<br>4530 | 116.3  | 110.4  | 0.04266 | 0.899 |
| CRY1           | cryptochrome circadian<br>clock 1(CRY1)                       | NM_0040<br>75    | 105.8  | 116.6  | 0.04272 | 1.26  |
| cryaa          | crystallin alpha<br>A(CRYAA)                                  | NM_0003<br>94    | 121.6  | 166.5  | 0.04272 | 1.26  |

|          |                                                    |           |       |       |         |       |
|----------|----------------------------------------------------|-----------|-------|-------|---------|-------|
| PRMT1    | protein arginine methyltransferase 1(PRMT1)        | NM_198319 | 451.8 | 726.2 | 0.04292 | 1.378 |
| ACOT2    | acyl-CoA thioesterase 2(ACOT2)                     | NM_006821 | 259.5 | 193.4 | 0.04295 | 0.682 |
| RASEF    | RAS and EF-hand domain containing(RASEF)           | NM_152573 | 133.6 | 229.4 | 0.04299 | 1.569 |
| ICA1     | islet cell autoantigen 1(ICA1)                     | NM_004968 | 108.4 | 101.2 | 0.04299 | 0.886 |
| KITLG    | KIT ligand(KITLG)                                  | NM_000899 | 136.5 | 148.7 | 0.04309 | 1.289 |
| KLB      | klotho beta(KLB)                                   | NM_175737 | 179.8 | 265.7 | 0.04309 | 1.289 |
| MRFAP1L1 | Morf4 family associated protein 1 like 1(MRFAP1L1) | NM_203462 | 454.5 | 751.2 | 0.04315 | 1.416 |
| ANKRD17  | ankyrin repeat domain 17(ANKRD17)                  | NM_198889 | 98.6  | 125.5 | 0.04317 | 1.202 |
| MAVS     | mitochondrial antiviral signaling protein(MAVS)    | NM_020746 | 104   | 126.3 | 0.0432  | 1.134 |
| DLX6     | distal-less homeobox 6(DLX6)                       | NM_005222 | 187.9 | 167   | 0.04327 | 0.831 |
| DTNA     | dystrobrevin alpha(DTNA)                           | NM_032980 | 105.6 | 127.8 | 0.04331 | 1.158 |
| IER2     | immediate early response 2(IER2)                   | NM_004907 | 99.8  | 111.9 | 0.04342 | 1.088 |
|          |                                                    | XM_929291 | 103.2 | 96.4  | 0.04361 | 0.897 |

|               |                                                             |                  |       |        |         |       |
|---------------|-------------------------------------------------------------|------------------|-------|--------|---------|-------|
| TM2D3         | TM2 domain containing<br>3(TM2D3)                           | NM_0784<br>74    | 144.6 | 210.6  | 0.0437  | 1.311 |
| zswim5        | zinc finger SWIM-type<br>containing 5(ZSWIM5)               | NM_0208<br>83    | 105.2 | 134.2  | 0.04386 | 1.21  |
| CCDC11<br>5   | coiled-coil domain<br>containing<br>115(CCDC115)            | NM_0323<br>57    | 104.5 | 123.2  | 0.04389 | 1.125 |
| ZNF548        | zinc finger protein<br>548(ZNF548)                          | NM_1529<br>09    | 144.8 | 176.6  | 0.04393 | 1.115 |
| RP2           | retinitis pigmentosa 2 (X-<br>linked recessive)(RP2)        | NM_0069<br>15    | 108.5 | 133.8  | 0.04406 | 1.166 |
| FAM167<br>B   | family with sequence<br>similarity 167 member<br>B(FAM167B) | NM_0326<br>48    | 100.7 | 117.6  | 0.04406 | 1.118 |
| RASSF4        | Ras association domain<br>family member<br>4(RASSF4)        | NM_0320<br>23    | 267.4 | 209.6  | 0.04414 | 0.712 |
| DSCAM         | DS cell adhesion<br>molecule(DSCAM)                         | NM_0013<br>89    | 105.3 | 120.2  | 0.04416 | 1.084 |
|               |                                                             | XR_03927<br>8    | 1398  | 2010.8 | 0.04419 | 1.281 |
| LOC284<br>009 | uncharacterized<br>LOC284009(LOC28400<br>9)                 | NM_0010<br>25459 | 134.1 | 123.9  | 0.0443  | 0.871 |
| RHOT1         | ras homolog family<br>member T1(RHOT1)                      | NM_0010<br>33566 | 192.4 | 280.1  | 0.04439 | 1.266 |
| RHOT1         | ras homolog family<br>member T1(RHOT1)                      | NM_0010<br>33566 | 316.4 | 379.3  | 0.04439 | 1.266 |
|               |                                                             | XM_00113<br>3534 | 544.4 | 1026.9 | 0.04448 | 1.65  |



|       |                                                       |          |       |        |         |       |                  |       |       |
|-------|-------------------------------------------------------|----------|-------|--------|---------|-------|------------------|-------|-------|
|       |                                                       | XM_00113 |       |        |         |       |                  |       |       |
|       |                                                       | 3534     | 742.4 | 1375.2 | 0.04448 | 1.65  |                  |       |       |
|       |                                                       | NM_0530  |       |        |         |       |                  |       |       |
| PFN2  | profilin 2(PFN2)                                      | 24       | 631.9 | 1133.6 | 0.0445  | 1.57  |                  |       |       |
|       |                                                       | NM_0010  |       |        |         |       | NM_017           |       |       |
| PHF6  | PHD finger protein 6(PHF6)                            | 15877    | 113.8 | 149.1  | 0.04466 | 1.232 | 170              | 13.37 | 0.05  |
|       |                                                       | NM_1528  |       |        |         |       |                  |       |       |
| PTK7  | protein tyrosine kinase 7 (inactive)(PTK7)            | 82       | 134.6 | 210.4  | 0.04466 | 1.422 |                  |       |       |
|       |                                                       | BF194881 | 131.1 | 124.9  | 0.04474 | 0.876 |                  |       |       |
|       |                                                       | DB337588 | 118.9 | 112.8  | 0.04487 | 0.908 |                  |       |       |
|       |                                                       | NM_0072  |       |        |         |       |                  |       |       |
| ZHX1  | zinc fingers and homeoboxes 1(ZHX1)                   | 22       | 98.1  | 121    | 0.04493 | 1.171 |                  |       |       |
|       |                                                       | XM_93354 |       |        |         |       |                  |       |       |
|       |                                                       | 3        | 123.3 | 117.8  | 0.04501 | 0.89  |                  |       |       |
|       |                                                       | NM_0014  |       |        |         |       |                  |       |       |
| GAGE4 | G antigen 4(GAGE4)                                    | 74       | 145.7 | 227    | 0.04506 | 1.382 |                  |       |       |
|       |                                                       | NM_0031  |       |        |         |       |                  |       |       |
| SORD  | sorbitol dehydrogenase(SORD)                          | 04       | 145.7 | 111.7  | 0.04511 | 0.696 |                  |       |       |
|       |                                                       | NM_1829  |       |        |         |       |                  |       |       |
| MOBP  | myelin-associated oligodendrocyte basic protein(MOBP) | 35       | 115.1 | 106.7  | 0.04511 | 0.89  |                  |       |       |
|       |                                                       | NR_00131 |       |        |         |       |                  |       |       |
| HCG4B | HLA complex group 4B (non-protein coding)(HCG4B)      | 7        | 110.7 | 130.6  | 0.04511 | 1.11  | NM_001<br>106492 | 2.61  | 10.85 |
|       |                                                       | NM_0010  |       |        |         |       |                  |       |       |
| SUGP2 | SURP and G-patch domain containing 2(SUGP2)           | 17392    | 140.4 | 227.5  | 0.04513 | 1.443 | NM_001<br>106492 | 2.61  | 10.85 |

|         |                                                                 |              |       |        |         |       |              |      |       |
|---------|-----------------------------------------------------------------|--------------|-------|--------|---------|-------|--------------|------|-------|
| ACTR1B  | ARP1 actin-related protein 1 homolog B, contractin beta(ACTR1B) | NM_005735    | 387.6 | 517.3  | 0.04519 | 1.156 | NM_001106492 | 2.61 | 10.85 |
| IRF2BP2 | interferon regulatory factor 2 binding protein 2(IRF2BP2)       | NM_182972    | 147.5 | 139.7  | 0.04519 | 0.895 |              |      |       |
| PURB    | purine rich element binding protein B(PURB)                     | NM_033224    | 536.6 | 838.9  | 0.0452  | 1.356 |              |      |       |
| ABCC4   | ATP binding cassette subfamily C member 4(ABCC4)                | NM_005845    | 90.7  | 102.9  | 0.04522 | 1.425 |              |      |       |
| ABCC5   | ATP binding cassette subfamily C member 5(ABCC5)                | NM_001023587 | 229.1 | 379.6  | 0.04522 | 1.425 |              |      |       |
| DLAT    | dihydrolipoamide S-acetyltransferase(DLAT)                      | NM_001931    | 531.2 | 1140.2 | 0.04524 | 1.862 |              |      |       |
| GPN2    | GPN-loop GTPase 2(GPN2)                                         | NM_018066    | 129.6 | 315.4  | 0.04528 | 2.074 |              |      |       |
|         |                                                                 | XR_015609    | 111.5 | 108.6  | 0.04529 | 0.927 |              |      |       |
| C9orf72 | chromosome 9 open reading frame 72(C9orf72)                     | NM_018325    | 175.1 | 223.9  | 0.0453  | 1.183 |              |      |       |
|         |                                                                 | BQ185080     | 121.5 | 115.2  | 0.04532 | 0.9   |              |      |       |
|         |                                                                 | XM_940079    | 126.1 | 169.1  | 0.0454  | 1.227 |              |      |       |

|         |                                                                             |                  |       |       |         |       |                  |       |      |
|---------|-----------------------------------------------------------------------------|------------------|-------|-------|---------|-------|------------------|-------|------|
| OR4F21  | olfactory receptor family<br>4 subfamily F member<br>21(OR4F21)             | NM_0010<br>05504 | 144.4 | 131.2 | 0.04541 | 0.851 |                  |       |      |
| NOTCH3  | notch 3(NOTCH3)                                                             | NM_0004<br>35    | 196.5 | 302.7 | 0.04549 | 1.365 |                  |       |      |
| LCOR    | ligand dependent<br>nuclear receptor<br>corepressor(LCOR)                   | NM_0324<br>40    | 89.9  | 110.8 | 0.04553 | 1.196 |                  |       |      |
| UBR2    | ubiquitin protein ligase<br>E3 component n-<br>recognin 2(UBR2)             | NM_0152<br>55    | 205.4 | 204.3 | 0.04571 | 0.897 |                  |       |      |
|         |                                                                             | XR_01796<br>3    | 101   | 117.5 | 0.0458  | 1.101 |                  |       |      |
| MARK2   | microtubule affinity<br>regulating kinase<br>2(MARK2)                       | NM_0049<br>54    | 121.8 | 155.8 | 0.04583 | 1.227 |                  |       |      |
| MPRIP   | myosin phosphatase<br>Rho interacting<br>protein(MPRIP)                     | NM_0151<br>34    | 428.3 | 655.7 | 0.04591 | 1.341 |                  |       |      |
| CEACAM1 | carcinoembryonic<br>antigen related cell<br>adhesion molecule<br>1(CEACAM1) | NM_0017<br>12    | 98.8  | 127.4 | 0.04593 | 1.221 |                  |       |      |
| ANG     | angiogenin(ANG)                                                             | NM_0010<br>97577 | 131.7 | 176.3 | 0.04596 | 1.203 | NM_001<br>270681 | 26.79 | 0.09 |
| ARMCX3  | armadillo repeat<br>containing, X-linked<br>3(ARMCX3)                       | NM_1779<br>47    | 275.7 | 414   | 0.04596 | 1.282 |                  |       |      |
| PAPOLG  | poly(A) polymerase<br>gamma(PAPOLG)                                         | NM_0228<br>94    | 122.7 | 113.7 | 0.04608 | 0.904 |                  |       |      |

|        |                                                          |                  |        |       |         |       |               |        |      |
|--------|----------------------------------------------------------|------------------|--------|-------|---------|-------|---------------|--------|------|
| HECTD2 | HECT domain E3<br>ubiquitin protein ligase<br>2(HECTD2)  | NM_1827<br>65    | 499.3  | 744.7 | 0.04616 | 1.298 |               |        |      |
| XRCC5  | X-ray repair cross<br>complementing<br>5(XRCC5)          | NM_0211<br>41    | 116.8  | 140.3 | 0.04621 | 1.154 |               |        |      |
| STAG1  | stromal antigen<br>1(STAG1)                              | NM_0058<br>62    | 104    | 130.1 | 0.0463  | 1.302 |               |        |      |
| STAG1  | stromal antigen<br>1(STAG1)                              | NM_0058<br>62    | 136.5  | 199.9 | 0.0463  | 1.302 |               |        |      |
| TSPYL5 | TSPY like 5(TSPYL5)<br>4-                                | NM_0335<br>12    | 110.9  | 144.3 | 0.0463  | 1.232 | NM_019<br>373 | 263.23 | 1.01 |
| HPD    | hydroxyphenylpyruvate<br>dioxygenase(HPD)                | NM_0021<br>50    | 705.6  | 634.9 | 0.04632 | 0.773 |               |        |      |
| DUSP27 | dual specificity<br>phosphatase 27<br>(putative)(DUSP27) | NM_0010<br>80426 | 177.7  | 290.6 | 0.04634 | 1.441 |               |        |      |
| PML    | promyelocytic<br>leukemia(PML)                           | NM_0332<br>38    | 142.1  | 132.7 | 0.04635 | 0.889 |               |        |      |
| MT2A   | metallothionein<br>2A(MT2A)                              | NM_0059<br>53    | 1687.2 | 886   | 0.04637 | 0.474 |               |        |      |
| POFUT2 | protein O-<br>fucosyltransferase<br>2(POFUT2)            | NM_1336<br>35    | 175.3  | 253.2 | 0.04637 | 1.325 |               |        |      |
| POFUT2 | protein O-<br>fucosyltransferase<br>2(POFUT2)            | NM_1336<br>35    | 210    | 324   | 0.04637 | 1.325 |               |        |      |
|        |                                                          | XM_00171<br>7507 | 150.8  | 134.5 | 0.04639 | 0.844 |               |        |      |

|             |                                                       |                  |        |        |         |       |               |        |         |
|-------------|-------------------------------------------------------|------------------|--------|--------|---------|-------|---------------|--------|---------|
| NAT14       | N-acetyltransferase 14<br>(putative)(NAT14)           | NM_0203<br>78    | 109.4  | 133.7  | 0.04646 | 1.166 |               |        |         |
|             |                                                       | XM_00113<br>0428 | 130.9  | 122.2  | 0.04651 | 0.897 |               |        |         |
| ZNF112      | zinc finger protein<br>112(ZNF112)                    | NM_0010<br>83335 | 124    | 121.6  | 0.04658 | 0.921 |               |        |         |
|             |                                                       | XM_00171<br>8435 | 1858.9 | 3170.4 | 0.04663 | 1.506 |               |        |         |
| CTNS        | cystinosis, lysosomal<br>cystine<br>transporter(CTNS) | NM_0049<br>37    | 92.9   | 109.1  | 0.04668 | 1.131 |               |        |         |
| SLC12A<br>1 | solute carrier family 12<br>member 1(SLC12A1)         | NM_0003<br>38    | 354.4  | 919.4  | 0.04678 | 2.317 | NM_012<br>778 | 744.78 | 0.71    |
|             |                                                       | XM_00172<br>1828 | 127.3  | 114.6  | 0.0468  | 0.874 | NM_012<br>778 | 744.78 | 0.71    |
| AMDHD<br>2  | amidohydrolase domain<br>containing 2(AMDHD2)         | NM_0159<br>44    | 208.4  | 387.2  | 0.04693 | 1.585 | NM_012<br>778 | 744.78 | 0.71    |
| ACYP2       | acylphosphatase<br>2(ACYP2)                           | NM_1384<br>48    | 331    | 583.4  | 0.0471  | 1.561 |               |        |         |
| ACYP1       | acylphosphatase<br>1(ACYP1)                           | NM_0011<br>07    | 111.4  | 116.1  | 0.0471  | 1.561 |               |        |         |
|             |                                                       | XM_37420<br>0    | 110.6  | 105.2  | 0.0472  | 0.914 | NM_012<br>909 | 6.73   | 5427.66 |
|             |                                                       | XR_01888<br>9    | 161.9  | 252.8  | 0.04754 | 1.368 | NM_022<br>181 | 0.40   | 160.77  |
|             |                                                       | XM_94407<br>9    | 145    | 137.5  | 0.04756 | 0.884 | NM_019<br>157 | 14.48  | 0.05    |
| PLPP5       | phospholipid<br>phosphatase 5(PLPP5)                  | NM_0324<br>83    | 234.8  | 413.3  | 0.04771 | 1.501 |               |        |         |

|          |                                                                 |              |       |       |         |       |
|----------|-----------------------------------------------------------------|--------------|-------|-------|---------|-------|
| SLC30A5  | solute carrier family 30 member 5(SLC30A5)                      | NM_022902    | 155.6 | 204.1 | 0.04776 | 1.197 |
| SLC30A5  | solute carrier family 30 member 5(SLC30A5)                      | NM_022902    | 186.1 | 251.5 | 0.04776 | 1.197 |
| RAI1     | retinoic acid induced 1(RAI1)                                   | NM_030665    | 166.5 | 224.9 | 0.04791 | 1.139 |
| RAI1     | retinoic acid induced 1(RAI1)                                   | NM_030665    | 168.9 | 210.7 | 0.04791 | 1.139 |
| PALLD    | palladin, cytoskeletal associated protein(PALLD)                | NM_016081    | 289   | 670.3 | 0.04805 | 1.988 |
| HLA-DQB1 | major histocompatibility complex, class II, DQ beta 1(HLA-DQB1) | NM_002123    | 116.5 | 106.6 | 0.04807 | 0.894 |
| BCHE     | butyrylcholinesterase(BCHE)                                     | NM_000055    | 194.8 | 271.6 | 0.04814 | 1.219 |
| PRSS12   | protease, serine 12(PRSS12)                                     | NM_003619    | 100.3 | 122.6 | 0.0482  | 1.17  |
| UNC50    | unc-50 inner nuclear membrane RNA binding protein(UNC50)        | NM_014044    | 564.2 | 849.1 | 0.04823 | 1.295 |
| CAPRIN1  | cell cycle associated protein 1(CAPRIN1)                        | NM_005898    | 351.4 | 546.6 | 0.04829 | 1.359 |
| DCP2     | decapping mRNA 2(DCP2)                                          | NM_152624    | 142   | 130.8 | 0.0483  | 0.871 |
| DDX24    | DEAD-box helicase 24(DDX24)                                     | NM_020414    | 165.4 | 253.2 | 0.04831 | 1.363 |
|          |                                                                 | XM_001723486 | 116.7 | 107.4 | 0.04842 | 0.861 |

|         |                                                               |               |       |       |         |       |               |      |       |
|---------|---------------------------------------------------------------|---------------|-------|-------|---------|-------|---------------|------|-------|
| CSK     | c-src tyrosine kinase(CSK)                                    | NM_0043<br>83 | 93.3  | 112.9 | 0.04845 | 1.16  |               |      |       |
| KAT2B   | lysine acetyltransferase 2B(KAT2B)                            | NM_0038<br>84 | 132.2 | 120.9 | 0.04847 | 0.865 |               |      |       |
| URGCP   | upregulator of cell proliferation(URGCP)                      | NM_0179<br>20 | 459.2 | 428.6 | 0.0485  | 0.826 |               |      |       |
| UBE2E3  | ubiquitin conjugating enzyme E2 E3(UBE2E3)                    | NM_0063<br>57 | 127.3 | 131.4 | 0.04859 | 1.312 |               |      |       |
| UBE2E3  | ubiquitin conjugating enzyme E2 E3(UBE2E3)                    | NM_0063<br>57 | 157.4 | 234.2 | 0.04859 | 1.312 |               |      |       |
| UBE2E3  | ubiquitin conjugating enzyme E2 E3(UBE2E3)                    | NM_0063<br>57 | 431   | 760.1 | 0.04859 | 1.312 |               |      |       |
| CYP4A11 | cytochrome P450 family 4 subfamily A member 11(CYP4A11)       | NM_0007<br>78 | 124.5 | 120.8 | 0.0486  | 0.927 |               |      |       |
| SOCS5   | suppressor of cytokine signaling 5(SOCS5)                     | NM_0140<br>11 | 149.1 | 221.4 | 0.04864 | 1.291 |               |      |       |
| LRIG3   | leucine rich repeats and immunoglobulin like domains 3(LRIG3) | NM_1533<br>77 | 107.3 | 127.8 | 0.04864 | 1.161 |               |      |       |
| DOK1    | docking protein 1(DOK1)                                       | NM_0013<br>81 | 241.9 | 393.2 | 0.04874 | 1.434 |               |      |       |
|         |                                                               | XM_92956<br>5 | 217.9 | 198.6 | 0.04874 | 0.84  |               |      |       |
|         |                                                               | XR_03876<br>8 | 140.2 | 126.6 | 0.04876 | 0.848 | NM_019<br>168 | 8.26 | 61.49 |
|         |                                                               | AA454665      | 119.9 | 113.6 | 0.04878 | 0.894 |               |      |       |

|        |                                                                                      |           |         |        |         |       |
|--------|--------------------------------------------------------------------------------------|-----------|---------|--------|---------|-------|
| hyal3  | hyaluronoglucosaminidase 3(HYAL3)                                                    | NM_003549 | 1365.7  | 1085.5 | 0.04886 | 0.695 |
| MT1A   | metallothionein 1A(MT1A)                                                             | NM_005946 | 11240.4 | 5630.1 | 0.04894 | 0.441 |
| DPM1   | dolichyl-phosphate mannosyltransferase subunit 1, catalytic(DPM1)                    | NM_003859 | 167.3   | 214.6  | 0.04898 | 1.208 |
| DPM2   | dolichyl-phosphate mannosyltransferase subunit 2, regulatory(DPM2)                   | NM_003863 | 463.5   | 648.1  | 0.04898 | 1.208 |
| TGM5   | transglutaminase 5(TGM5)                                                             | NM_201631 | 110.8   | 106.2  | 0.04898 | 0.915 |
| ACTR5  | ARP5 actin-related protein 5 homolog(ACTR5)                                          | NM_024855 | 106.5   | 117.3  | 0.04901 | 1.071 |
| ZNF616 | zinc finger protein 616(ZNF616)                                                      | NM_178523 | 166.8   | 234    | 0.04903 | 1.24  |
| FGF18  | fibroblast growth factor 18(FGF18)                                                   | NM_003862 | 90.5    | 114.3  | 0.04906 | 1.216 |
| FBXO11 | F-box protein 11(FBXO11)                                                             | NM_018693 | 113.5   | 102.8  | 0.04911 | 0.876 |
| FBXO11 | F-box protein 11(FBXO11)                                                             | NM_025133 | 124.4   | 118.9  | 0.04911 | 0.876 |
| ST13   | suppression of tumorigenicity 13 (colon carcinoma) (Hsp70 interacting protein)(ST13) | NM_003932 | 272.3   | 206.7  | 0.04912 | 0.675 |



|          |                                                                                                              |              |       |        |         |       |
|----------|--------------------------------------------------------------------------------------------------------------|--------------|-------|--------|---------|-------|
| TTC3     | tetratricopeptide repeat domain 3(TTC3)                                                                      | NM_003316    | 282.6 | 435.8  | 0.04931 | 1.339 |
| MYH10    | myosin heavy chain 10(MYH10)                                                                                 | NM_005964    | 999.3 | 1734.4 | 0.04936 | 1.546 |
|          |                                                                                                              | XM_498859    | 118.2 | 110.8  | 0.04938 | 0.898 |
| UGT1A6   | UDP glucuronosyltransferase family 1 member A6(UGT1A6)                                                       | NM_001072    | 146.1 | 129    | 0.0496  | 0.714 |
| UGT1A6   | UDP glucuronosyltransferase family 1 member A6(UGT1A6)                                                       | NM_001072    | 161.1 | 128.8  | 0.0496  | 0.714 |
| ZNF567   | zinc finger protein 567(ZNF567)                                                                              | NM_152603    | 100.2 | 117.6  | 0.04961 | 1.128 |
| ATP5A1   | ATP synthase, H <sup>+</sup> transporting, mitochondrial F1 complex, alpha subunit 1, cardiac muscle(ATP5A1) | NM_004046    | 164.7 | 291.5  | 0.04966 | 1.527 |
| FAM131C  | family with sequence similarity 131 member C(FAM131C)                                                        | NM_182623    | 108.1 | 131.4  | 0.04966 | 1.167 |
| FAM132A  | family with sequence similarity 132 member A(FAM132A)                                                        | NM_001014980 | 173.9 | 170.2  | 0.04966 | 1.167 |
| RAP1GDS1 | Rap1 GTPase-GDP dissociation stimulator 1(RAP1GDS1)                                                          | NM_021159    | 152.2 | 196.2  | 0.04973 | 1.197 |

|             |                                                               |                  |       |        |         |        |
|-------------|---------------------------------------------------------------|------------------|-------|--------|---------|--------|
| sdc1        | syndecan 1(SDC1)                                              | NM_0010<br>06946 | 449.1 | 285.7  | 0.04975 | 0.562  |
| ARMC8       | armadillo repeat<br>containing 8(ARMC8)                       | NM_0153<br>96    | 106.4 | 125.8  | 0.04976 | 1.106  |
| ARMC8       | armadillo repeat<br>containing 8(ARMC8)                       | NM_2136<br>54    | 108.6 | 128.3  | 0.04976 | 1.106  |
| DEFB12<br>3 | defensin beta<br>123(DEFB123)                                 | NM_1533<br>24    | 102.3 | 126.3  | 0.04976 | 1.152  |
| AGPS        | alkylglycerone<br>phosphate<br>synthase(AGPS)                 | NM_0036<br>59    | 153.7 | 145    | 0.04978 | 0.884  |
| SNORD<br>3A | small nucleolar RNA,<br>C/D box 3A(SNORD3A)                   | NR_00688<br>0    | 173.2 | 158.3  | 0.04979 | 0.841  |
| MMGT1       | membrane magnesium<br>transporter 1(MMGT1)                    | NM_1734<br>70    | 182.1 | 208.7  | 0.04979 | 1.271  |
| MMGT1       | membrane magnesium<br>transporter 1(MMGT1)                    | NM_1734<br>70    | 605.3 | 897.2  | 0.04979 | 1.271  |
| OR2B2       | olfactory receptor family<br>2 subfamily B member<br>2(OR2B2) | NM_0330<br>57    | 129.6 | 118    | 0.04984 | 0.839  |
| STX12       | syntaxin 12(STX12)                                            | NM_1774<br>24    | 188.3 | 246.2  | 0.04986 | 1.168  |
| fosl1       | FOS like 1, AP-1<br>transcription factor<br>subunit(FOSL1)    | NM_0054<br>38    | 194.5 | 2066.5 | 0.0499  | 10.276 |
| TBX3        | T-box 3(TBX3)                                                 | NM_0059<br>96    | 111.7 | 132.8  | 0.04995 | 1.121  |
| CHMP2<br>A  | charged multivesicular<br>body protein<br>2A(CHMP2A)          | NM_0144<br>53    | 130   | 152.2  | 0.05    | 1.116  |

| Gene Symbol | Gene Name                                             | Accession No. | IUGR Chow M Mean | IUGR HFHS M Mean | p-val IUGR M HFHS vs. CON M HFHS | Ratio IUGR M HFHS vs. CON M HFHS | REFSEQ ID | NEPHRON (MEAN RPKM) | COLLECTIN G DUCT (MEAN RPKM) |
|-------------|-------------------------------------------------------|---------------|------------------|------------------|----------------------------------|----------------------------------|-----------|---------------------|------------------------------|
|             |                                                       | XM_927511     | 92.1             | 101.9            | 0.00001                          | 1.219                            |           |                     |                              |
| VRK3        | vaccinia related kinase 3(VRK3)                       | NM_001025778  | 96.8             | 95.2             | 0.00003                          | 1.28                             |           |                     |                              |
| VRK3        | vaccinia related kinase 3(VRK3)                       | NM_001025778  | 180.3            | 150.5            | 0.00003                          | 1.28                             |           |                     |                              |
| MPHOSPH10   | M-phase phosphoprotein 10(MPHOSPH10)                  | NM_005791     | 409.1            | 391.6            | 0.00005                          | 1.389                            |           |                     |                              |
|             |                                                       | XM_927848     | 101.2            | 99               | 0.00007                          | 0.784                            |           |                     |                              |
| fam134b     | family with sequence similarity 134 member B(FAM134B) | NM_001034850  | 368.5            | 320.8            | 0.0001                           | 1.602                            |           |                     |                              |
| RPS26       | ribosomal protein S26(RPS26)                          | NM_001029     | 93               | 82.7             | 0.00011                          | 0.838                            |           |                     |                              |
| RPS26       | ribosomal protein S26(RPS26)                          | NM_001029     | 1438.4           | 1055.6           | 0.00011                          | 0.838                            |           |                     |                              |
| TMEM184C    | transmembrane protein 184C(TMEM184C)                  | NM_018241     | 103.1            | 104.8            | 0.00017                          | 1.194                            | NM_017193 | 356.13              | 8.18                         |
| TMEM184C    | transmembrane protein 184C(TMEM184C)                  | NM_018241     | 256.8            | 245.8            | 0.00017                          | 1.194                            | NM_017193 | 356.13              | 8.18                         |
|             |                                                       | XM_001133500  | 129.3            | 163.1            | 0.00018                          | 1.458                            | NM_017193 | 356.13              | 8.18                         |
|             |                                                       | XM_934672     | 104.5            | 101              | 0.00019                          | 1.15                             | NM_017193 | 356.13              | 8.18                         |

|                  |                                                                 |                  |       |       |         |       |
|------------------|-----------------------------------------------------------------|------------------|-------|-------|---------|-------|
|                  |                                                                 | XM_00172<br>3164 | 122.5 | 137.8 | 0.0002  | 1.153 |
| SEZ6L2           | seizure related 6<br>homolog like 2(SEZ6L2)                     | NM_2015<br>75    | 102   | 87.2  | 0.0002  | 0.84  |
| RAI1             | retinoic acid induced<br>1(RAI1)                                | NM_0306<br>65    | 142.8 | 121.4 | 0.00025 | 0.733 |
| RAI1             | retinoic acid induced<br>1(RAI1)                                | NM_0306<br>65    | 164.3 | 172   | 0.00025 | 0.733 |
|                  |                                                                 | AI350600         | 97.7  | 103.8 | 0.00025 | 1.154 |
|                  |                                                                 | XM_00171<br>7043 | 129.2 | 145.6 | 0.00032 | 1.42  |
| TTLL9            | tubulin tyrosine ligase<br>like 9(TTLL9)                        | NM_0010<br>08409 | 92.1  | 100.1 | 0.00035 | 1.257 |
| CCND1            | cyclin D1(CCND1)                                                | NM_0530<br>56    | 138.6 | 148.6 | 0.00039 | 1.304 |
| CCNC             | cyclin C(CCNC)                                                  | NM_0051<br>90    | 126.3 | 128.5 | 0.00039 | 1.304 |
| RRAGB            | Ras related GTP binding<br>B(RRAGB)                             | NM_0060<br>64    | 91.4  | 89    | 0.00041 | 0.653 |
| RRAGB            | Ras related GTP binding<br>B(RRAGB)                             | NM_0060<br>64    | 110.8 | 119.2 | 0.00041 | 0.653 |
| EIF6             | eukaryotic translation<br>initiation factor 6(EIF6)             | NM_1814<br>66    | 457.4 | 426.8 | 0.00046 | 1.382 |
| LOC101<br>927421 | uncharacterized<br>LOC101927421(LOC10<br>1927421)               | BU517015         | 104.6 | 127.7 | 0.00048 | 1.322 |
| OR52N5           | olfactory receptor family<br>52 subfamily N member<br>5(OR52N5) | NM_0010<br>01922 | 99.9  | 106   | 0.0005  | 1.172 |

|         |                                              |              |       |       |         |       |
|---------|----------------------------------------------|--------------|-------|-------|---------|-------|
|         |                                              | XM_001714678 | 99.8  | 102.5 | 0.00053 | 1.178 |
| RORA    | RAR related orphan receptor A(RORA)          | NM_134261    | 96.1  | 108.6 | 0.00054 | 1.188 |
|         |                                              | XM_936101    | 168.2 | 178.1 | 0.00061 | 1.303 |
|         |                                              | XR_039453    | 109.9 | 102.4 | 0.00064 | 1.167 |
|         |                                              | XR_039453    | 203.3 | 176   | 0.00064 | 1.167 |
| TIGD1   | tigger transposable element derived 1(TIGD1) | NM_145702    | 97.5  | 100.2 | 0.0007  | 1.191 |
|         |                                              | BX111977     | 101.4 | 93.1  | 0.00072 | 0.846 |
|         |                                              | XM_942158    | 98.7  | 101.1 | 0.00074 | 1.201 |
| ATCAY   | ATCAY, caytaxin(ATCAY)                       | NM_033064    | 114.3 | 93.6  | 0.00081 | 0.801 |
| ZNF137P | zinc finger protein 137, pseudogene(ZNF137P) | NM_003438    | 123.9 | 107.3 | 0.00083 | 0.786 |
| RPN2    | ribophorin II(RPN2)                          | NM_002951    | 330.9 | 310.2 | 0.00087 | 1.341 |
|         |                                              | XM_927344    | 101.3 | 113.6 | 0.00091 | 1.175 |
|         |                                              | NM_000648    | 93.4  | 90.3  | 0.00092 | 1.291 |
|         |                                              | NM_000648    | 96.7  | 108.6 | 0.00092 | 1.291 |
|         |                                              | BX103136     | 108.4 | 96.7  | 0.00101 | 0.822 |
| MBP     | myelin basic protein(MBP)                    | NM_001025090 | 252.9 | 264.5 | 0.00114 | 1.672 |

|              |                                                                        |                                   |       |       |         |       |
|--------------|------------------------------------------------------------------------|-----------------------------------|-------|-------|---------|-------|
| PPARA        | peroxisome proliferator<br>activated receptor<br>alpha(PPARA)          | NM_0010<br>01928                  | 121.6 | 125.4 | 0.00131 | 1.312 |
| C3orf84      | chromosome 3 open<br>reading frame<br>84(C3orf84)                      | NM_0010<br>80528                  | 110.3 | 112.1 | 0.00132 | 1.229 |
| TRIM51<br>EP | tripartite motif-containing<br>51E,<br>pseudogene(TRIM51EP<br>)        | NM_0011<br>36118<br>XM_93610<br>3 | 115.4 | 121.1 | 0.0015  | 1.191 |
|              |                                                                        |                                   | 158.8 | 169.6 | 0.00153 | 1.502 |
| NAA25        | N(alpha)-<br>acetyltransferase 25,<br>NatB auxiliary<br>subunit(NAA25) | NM_0249<br>53                     | 193.6 | 203.3 | 0.00155 | 1.316 |
| SFTA2        | surfactant associated<br>2(SFTA2)                                      | NM_2058<br>54                     | 100.1 | 91.9  | 0.00165 | 0.839 |
| PCDH18       | protocadherin<br>18(PCDH18)                                            | NM_0190<br>35                     | 117.6 | 102.5 | 0.00171 | 0.774 |
| PCDH18       | protocadherin<br>18(PCDH18)                                            | NM_0190<br>35                     | 223.4 | 162.3 | 0.00171 | 0.774 |
| CYP4X1       | cytochrome P450 family<br>4 subfamily X member<br>1(CYP4X1)            | NM_1780<br>33                     | 97.2  | 104.4 | 0.00191 | 1.245 |
| LRBA         | LPS responsive beige-<br>like anchor<br>protein(LRBA)                  | NM_0067<br>26                     | 99.3  | 92.8  | 0.00204 | 0.828 |
| GPM6B        | glycoprotein<br>M6B(GPM6B)                                             | NM_0010<br>01995                  | 130.7 | 142.1 | 0.00205 | 1.341 |

|            |                                                                  |                  |       |       |         |       |
|------------|------------------------------------------------------------------|------------------|-------|-------|---------|-------|
|            |                                                                  | XM_94465<br>3    | 98.1  | 113.5 | 0.00211 | 1.177 |
| MCTS1      | MCTS1, re-initiation and<br>release factor(MCTS1)                | NM_0140<br>60    | 184.6 | 192.4 | 0.00215 | 1.407 |
| TBC1D7     | TBC1 domain family<br>member 7(TBC1D7)                           | NM_0164<br>95    | 183.5 | 141.2 | 0.00227 | 0.768 |
| AAMDC      | adipogenesis<br>associated Mth938<br>domain<br>containing(AAMDC) | NM_0246<br>84    | 111   | 113.1 | 0.00236 | 0.829 |
| AAK1       | AP2 associated kinase<br>1(AAK1)                                 | NM_0149<br>11    | 100.8 | 89    | 0.00236 | 0.829 |
|            |                                                                  | BM930795         | 105.8 | 117.8 | 0.00236 | 1.192 |
| ARMCX<br>2 | armadillo repeat<br>containing, X-linked<br>2(ARMCX2)            | NM_1779<br>49    | 95.7  | 103   | 0.00247 | 1.19  |
|            |                                                                  | BU587445         | 101.9 | 95.2  | 0.0025  | 0.887 |
| RORA       | RAR related orphan<br>receptor A(RORA)                           | AK055969         | 134.3 | 125.8 | 0.0025  | 1.384 |
| MEG8       | maternally expressed 8<br>(non-protein<br>coding)(MEG8)          | NR_02414<br>9    | 93.2  | 98.6  | 0.00251 | 1.234 |
| TRIM36     | tripartite motif containing<br>36(TRIM36)                        | NM_0010<br>17397 | 87.1  | 88.5  | 0.00253 | 0.842 |
|            |                                                                  | XM_00171<br>7551 | 103.1 | 100.8 | 0.00256 | 1.155 |
|            |                                                                  | XM_00171<br>5747 | 91.4  | 102.4 | 0.00263 | 1.195 |

|        |                                                      |              |       |       |         |       |           |            |
|--------|------------------------------------------------------|--------------|-------|-------|---------|-------|-----------|------------|
| RSRC2  | arginine and serine rich coiled-coil 2(RSRC2)        | NM_023012    | 112.4 | 102.5 | 0.00269 | 0.743 |           |            |
| RSRC2  | arginine and serine rich coiled-coil 2(RSRC2)        | NM_023012    | 607.3 | 465.3 | 0.00269 | 0.743 |           |            |
| OPRM1  | opioid receptor mu 1(OPRM1)                          | NM_001008505 | 105.6 | 96.1  | 0.0027  | 0.889 |           |            |
| OPRM1  | opioid receptor mu 1(OPRM1)                          | NM_001008505 | 143.3 | 135.2 | 0.0027  | 0.889 |           |            |
|        |                                                      | XR_017376    | 105.2 | 92.8  | 0.00277 | 0.809 |           |            |
|        |                                                      | XR_017376    | 108.1 | 99.5  | 0.00277 | 0.809 |           |            |
| HAGH   | hydroxyacylglutathione hydrolase(HAGH)               | NM_005326    | 92.2  | 99.8  | 0.00277 | 1.247 |           |            |
| SPRN   | shadow of prion protein homolog (zebrafish)(SPRN)    | NM_001012508 | 91.6  | 90.4  | 0.0028  | 1.152 |           |            |
| SPRN   | shadow of prion protein homolog (zebrafish)(SPRN)    | NM_001012508 | 98.1  | 105.9 | 0.0028  | 1.152 | NM_053502 | 4.02 18.01 |
| BTLA   | B and T lymphocyte associated(BTLA)                  | NM_181780    | 92.2  | 98.4  | 0.00283 | 1.179 | NM_053502 | 4.02 18.01 |
| PDGFRL | platelet derived growth factor receptor like(PDGFRL) | NM_006207    | 109.9 | 95.1  | 0.00285 | 0.793 | NM_053502 | 4.02 18.01 |
| SPAG6  | sperm associated antigen 6(SPAG6)                    | NM_172242    | 130.5 | 101.6 | 0.00289 | 0.775 | NM_053502 | 4.02 18.01 |
| Amy1a  | amylase, alpha 1A (salivary)(AMY1A)                  | NM_001008221 | 90.5  | 87.3  | 0.00292 | 0.839 |           |            |



|          |                                                                |              |        |        |         |       |              |       |      |
|----------|----------------------------------------------------------------|--------------|--------|--------|---------|-------|--------------|-------|------|
| TMTC3    | transmembrane and tetratricopeptide repeat containing 3(TMTC3) | NM_181783    | 139.4  | 161.3  | 0.00292 | 1.292 |              |       |      |
| ABCF1    | ATP binding cassette subfamily F member 1(ABCF1)               | NM_001025091 | 107.1  | 94.8   | 0.00295 | 0.859 |              |       |      |
|          |                                                                | XM_001725241 | 102.1  | 85.2   | 0.00296 | 0.862 |              |       |      |
| HEPACAM2 | HEPACAM family member 2(HEPACAM2)                              | NM_198151    | 123.5  | 128.7  | 0.00299 | 1.295 |              |       |      |
| KALRN    | kalirin, RhoGEF kinase(KALRN)                                  | NM_003947    | 3377.9 | 2800.3 | 0.003   | 0.724 |              |       |      |
|          |                                                                | XM_944999    | 114.1  | 125    | 0.00301 | 1.21  | NM_001009670 | 33.30 | 2.04 |
| DCTN2    | dynactin subunit 2(DCTN2)                                      | NM_006400    | 139.4  | 129    | 0.00302 | 1.179 |              |       |      |
| DCTN1    | dynactin subunit 1(DCTN1)                                      | NM_004082    | 91     | 99     | 0.00302 | 1.179 |              |       |      |
| GORASP2  | golgi reassembly stacking protein 2(GORASP2)                   | NM_015530    | 103.5  | 98.9   | 0.00303 | 0.888 |              |       |      |
| PPTC7    | PTC7 protein phosphatase homolog(PPTC7)                        | NM_139283    | 238.9  | 261.2  | 0.00311 | 1.449 |              |       |      |
| ZNF548   | zinc finger protein 548(ZNF548)                                | NM_152909    | 137.1  | 117.4  | 0.00315 | 0.836 |              |       |      |
| MYO19    | myosin XIX(MYO19)                                              | NM_025109    | 91.7   | 86.7   | 0.00317 | 0.851 |              |       |      |
|          |                                                                | XM_939706    | 106.9  | 107.8  | 0.00318 | 1.244 |              |       |      |

|        |                                                                      |               |       |       |         |       |
|--------|----------------------------------------------------------------------|---------------|-------|-------|---------|-------|
| ATG4A  | autophagy related 4A<br>cysteine<br>peptidase(ATG4A)                 | NM_1782<br>70 | 91.3  | 96.8  | 0.00324 | 1.193 |
| KCTD10 | potassium channel<br>tetramerization domain<br>containing 10(KCTD10) | NM_0319<br>54 | 96.8  | 82.7  | 0.00325 | 0.836 |
| SCN2B  | sodium voltage-gated<br>channel beta subunit<br>2(SCN2B)             | NM_0045<br>88 | 96.5  | 101.2 | 0.00338 | 1.215 |
| BAG5   | BCL2 associated<br>athanogene 5(BAG5)                                | NM_0048<br>73 | 152.1 | 151.7 | 0.00339 | 1.297 |
| JMJD1C | jumonji domain<br>containing 1C(JMJD1C)                              | NM_0327<br>76 | 103   | 95.9  | 0.00346 | 0.854 |
| JMJD1C | jumonji domain<br>containing 1C(JMJD1C)                              | NM_0327<br>76 | 238.7 | 158.7 | 0.00346 | 0.854 |
| JMJD1C | jumonji domain<br>containing 1C(JMJD1C)                              | NM_0327<br>76 | 396.4 | 291.5 | 0.00346 | 0.854 |
| RRP1B  | ribosomal RNA<br>processing 1B(RRP1B)                                | NM_0150<br>56 | 97.9  | 98.3  | 0.0035  | 1.236 |
| CRHBP  | corticotropin releasing<br>hormone binding<br>protein(CRHBP)         | NM_0018<br>82 | 93.8  | 101   | 0.00351 | 1.189 |
|        |                                                                      | BX109970      | 104.8 | 100.8 | 0.00353 | 0.753 |
|        |                                                                      | XR_01753<br>2 | 214.7 | 191.6 | 0.00358 | 1.368 |
|        |                                                                      | XR_03704<br>7 | 96.6  | 100.5 | 0.00376 | 1.149 |

|        |                                                                     |                  |       |       |         |       |
|--------|---------------------------------------------------------------------|------------------|-------|-------|---------|-------|
| ZNF177 | zinc finger protein<br>177(ZNF177)                                  | NM_0034<br>51    | 153.2 | 134.3 | 0.00385 | 0.827 |
| UBTF   | upstream binding<br>transcription factor, RNA<br>polymerase I(UBTF) | NM_0142<br>33    | 95.9  | 97.8  | 0.00398 | 0.818 |
| UBTF   | upstream binding<br>transcription factor, RNA<br>polymerase I(UBTF) | NM_0142<br>33    | 102.9 | 88.1  | 0.00398 | 0.818 |
| ZNF436 | zinc finger protein<br>436(ZNF436)                                  | NM_0306<br>34    | 90.6  | 95.1  | 0.00409 | 0.798 |
| ZNF436 | zinc finger protein<br>436(ZNF436)                                  | NM_0306<br>34    | 108.6 | 93.7  | 0.00409 | 0.798 |
| ABHD12 | abhydrolase domain<br>containing 12(ABHD12)                         | NM_0010<br>42472 | 93.2  | 98.9  | 0.00415 | 1.155 |
|        |                                                                     | AA722034         | 102.7 | 109.3 | 0.00422 | 1.199 |
| FZD1   | frizzled class receptor<br>1(FZD1)                                  | NM_0035<br>05    | 119.8 | 108.1 | 0.00423 | 1.169 |
| FZD2   | frizzled class receptor<br>2(FZD2)                                  | NM_0014<br>66    | 149.7 | 143.3 | 0.00423 | 1.169 |
| PHF12  | PHD finger protein<br>12(PHF12)                                     | NM_0208<br>89    | 103.9 | 97.8  | 0.0043  | 0.845 |
|        |                                                                     | XM_93079<br>8    | 105.9 | 90.4  | 0.00433 | 0.825 |
| RBCK1  | RANBP2-type and<br>C3HC4-type zinc finger<br>containing 1(RBCK1)    | NM_0064<br>62    | 152.4 | 132.4 | 0.00437 | 1.12  |
|        |                                                                     | XM_94246<br>9    | 105   | 111.7 | 0.00445 | 1.271 |

|         |                                                                               |                  |       |       |         |       |
|---------|-------------------------------------------------------------------------------|------------------|-------|-------|---------|-------|
|         |                                                                               | XM_94246<br>9    | 150.9 | 128.9 | 0.00445 | 1.271 |
| ZNF138  | zinc finger protein<br>138(ZNF138)                                            | NM_0065<br>24    | 93.5  | 98.2  | 0.00447 | 1.177 |
| GMCL1   | germ cell-less,<br>spermatogenesis<br>associated 1(GMCL1)                     | NM_1784<br>39    | 95.1  | 106.3 | 0.00451 | 1.207 |
| GMDS    | GDP-mannose 4,6-<br>dehydratase(GMDS)                                         | NM_0015<br>00    | 160.1 | 135.5 | 0.00451 | 1.207 |
|         |                                                                               | XR_03811<br>9    | 100.7 | 111.4 | 0.00456 | 1.277 |
| LETMD1  | LETM1 domain<br>containing 1(LETMD1)                                          | NM_0154<br>16    | 125.2 | 116.1 | 0.0046  | 1.177 |
| LFNG    | LFNG O-fucosylpeptide<br>3-beta-N-<br>acetylglucosaminyltransf<br>erase(LFNG) | NM_0010<br>40167 | 130.4 | 136.3 | 0.0046  | 1.177 |
|         |                                                                               | XM_92970<br>1    | 102.4 | 108.8 | 0.00463 | 1.149 |
| SEL1L3  | SEL1L family member<br>3(SEL1L3)                                              | NM_0151<br>87    | 116   | 113.6 | 0.00485 | 1.243 |
|         |                                                                               | XR_01842<br>4    | 113.2 | 115.5 | 0.00494 | 1.206 |
| c12orf4 | chromosome 12 open<br>reading frame<br>4(C12orf4)                             | NM_0203<br>74    | 107.1 | 105   | 0.00496 | 1.165 |
| SH3GL1  | SH3 domain containing<br>GRB2 like 1, endophilin<br>A2(SH3GL1)                | NM_0030<br>25    | 113   | 120.5 | 0.00499 | 1.234 |

|          |                                                                        |              |       |       |         |       |
|----------|------------------------------------------------------------------------|--------------|-------|-------|---------|-------|
| ZBTB43   | zinc finger and BTB domain containing 43(ZBTB43)                       | NM_014007    | 139.1 | 120.8 | 0.00505 | 1.24  |
| ST3GAL3  | ST3 beta-galactoside alpha-2,3-sialyltransferase 3(ST3GAL3)            | NM_174970    | 113.1 | 99.8  | 0.00511 | 0.864 |
| LST1     | leukocyte specific transcript 1(LST1)                                  | NM_205840    | 100.3 | 103.6 | 0.00513 | 1.151 |
|          |                                                                        | BM681626     | 92.4  | 97.7  | 0.00513 | 1.18  |
| C11ORF49 | chromosome 11 open reading frame 49(C11orf49)                          | NM_024113    | 90.6  | 99.6  | 0.00514 | 1.177 |
| slc26a6  | solute carrier family 26 member 6(SLC26A6)                             | NM_001040454 | 88.9  | 84.6  | 0.00515 | 0.834 |
| EEPD1    | endonuclease/exonuclease/phosphatase family domain containing 1(EEPD1) | NM_030636    | 112.2 | 118   | 0.00522 | 0.683 |
| HEATR3   | HEAT repeat containing 3(HEATR3)                                       | NM_182922    | 121.4 | 125.9 | 0.00526 | 1.24  |
|          |                                                                        | XR_040021    | 101.4 | 102.6 | 0.00532 | 1.129 |
|          |                                                                        | XR_015689    | 130.6 | 110.2 | 0.00547 | 0.802 |
|          |                                                                        | XM_001720837 | 102.1 | 103.9 | 0.00549 | 1.146 |
|          |                                                                        | AA705831     | 100.3 | 93.9  | 0.00551 | 0.88  |
| CCNL1    | cyclin L1(CCNL1)                                                       | NM_020307    | 105.6 | 109.2 | 0.00556 | 1.195 |

|      |                                                               |           |       |       |         |       |
|------|---------------------------------------------------------------|-----------|-------|-------|---------|-------|
| ASB8 | ankyrin repeat and SOCS box containing 8(ASB8)                | NM_024095 | 104.7 | 99.3  | 0.00562 | 0.891 |
| ASB9 | ankyrin repeat and SOCS box containing 9(ASB9)                | NM_024087 | 106.7 | 92.9  | 0.00562 | 0.891 |
| PIGN | phosphatidylinositol glycan anchor biosynthesis class N(PIGN) | NM_176787 | 95.4  | 94    | 0.00566 | 0.839 |
| PIGN | phosphatidylinositol glycan anchor biosynthesis class N(PIGN) | NM_176787 | 97.6  | 94.8  | 0.00566 | 0.839 |
|      |                                                               | XM_940199 | 96.9  | 103.1 | 0.00573 | 1.14  |
| RORA | RAR related orphan receptor A(RORA)                           | NM_002943 | 97.5  | 98.3  | 0.00574 | 1.262 |
| RORA | RAR related orphan receptor A(RORA)                           | NM_002943 | 127.3 | 119.3 | 0.00574 | 1.262 |
| SS18 | SS18, nBAF chromatin remodeling complex subunit(SS18)         | NM_005637 | 109   | 123   | 0.00577 | 1.326 |
| SS18 | SS18, nBAF chromatin remodeling complex subunit(SS18)         | NM_005637 | 214.4 | 178.5 | 0.00577 | 1.326 |
| SS18 | SS18, nBAF chromatin remodeling complex subunit(SS18)         | NM_005637 | 285.2 | 259.8 | 0.00577 | 1.326 |

|         |                                                                 |              |       |       |         |       |              |      |        |
|---------|-----------------------------------------------------------------|--------------|-------|-------|---------|-------|--------------|------|--------|
| MRGPR D | MAS related GPR family member D(MRGPRD)                         | NM_198923    | 106.7 | 99.2  | 0.00594 | 0.815 |              |      |        |
| CAPN10  | calpain 10(CAPN10)                                              | NM_023083    | 88.4  | 99.8  | 0.00597 | 1.207 |              |      |        |
| CAPN11  | calpain 11(CAPN11)                                              | NM_007058    | 101   | 104   | 0.00597 | 1.207 |              |      |        |
| CAMK1   | calcium/calmodulin dependent protein kinase I(CAMK1)            | NM_003656    | 175.8 | 166   | 0.00599 | 1.243 |              |      |        |
| GCSH    | glycine cleavage system protein H(GCSH)                         | NM_004483    | 110.2 | 89.6  | 0.00601 | 0.785 |              |      |        |
| RAB2B   | RAB2B, member RAS oncogene family(RAB2B)                        | NM_032846    | 348.1 | 310   | 0.00607 | 1.399 |              |      |        |
| E2F4    | E2F transcription factor 4(E2F4)                                | NM_001950    | 110.4 | 95.9  | 0.00616 | 0.871 |              |      |        |
| STMN3   | stathmin 3(STMN3)                                               | NM_015894    | 378.9 | 410.6 | 0.00632 | 1.407 | NM_001107943 | 0.63 | 112.77 |
|         |                                                                 | XR_017962    | 98.1  | 108.7 | 0.00633 | 1.189 |              |      |        |
|         |                                                                 | XR_017962    | 99.9  | 105.9 | 0.00633 | 1.189 |              |      |        |
|         |                                                                 | XM_001133686 | 91.8  | 104.2 | 0.00634 | 1.215 |              |      |        |
| map4k4  | mitogen-activated protein kinase kinase kinase kinase 4(MAP4K4) | NM_145687    | 185.9 | 156.6 | 0.00636 | 0.66  |              |      |        |

|        |                                                                   |          |       |       |         |       |        |       |      |
|--------|-------------------------------------------------------------------|----------|-------|-------|---------|-------|--------|-------|------|
|        |                                                                   | XM_92849 |       |       |         |       |        |       |      |
|        |                                                                   | 5        | 95.6  | 91.9  | 0.00637 | 0.845 |        |       |      |
| TMEM16 | transmembrane protein                                             | NM_0178  |       |       |         |       |        |       |      |
| 1A     | 161A(TMEM161A)                                                    | 14       | 112.1 | 112.7 | 0.00638 | 1.182 |        |       |      |
|        | potassium calcium-<br>activated channel<br>subfamily M regulatory |          |       |       |         |       |        |       |      |
| KCNMB  | beta subunit                                                      | NM_1813  |       |       |         |       |        |       |      |
| 2      | 2(KCNMB2)                                                         | 61       | 106.3 | 103.7 | 0.00644 | 1.136 |        |       |      |
|        | potassium calcium-<br>activated channel<br>subfamily M regulatory |          |       |       |         |       |        |       |      |
| KCNMB  | beta subunit                                                      | NM_0058  |       |       |         |       |        |       |      |
| 2      | 2(KCNMB2)                                                         | 32       | 92.5  | 103   | 0.00644 | 1.136 |        |       |      |
| MIR33B | microRNA 33b(MIR33B)                                              | NR_03036 |       |       |         |       |        |       |      |
|        |                                                                   | 1        | 84.7  | 81.6  | 0.00664 | 0.845 |        |       |      |
| PLXND1 | plexin D1(PLXND1)                                                 | NM_0151  |       |       |         |       |        |       |      |
|        |                                                                   | 03       | 104.3 | 84.3  | 0.00664 | 0.768 |        |       |      |
|        |                                                                   | XM_93203 |       |       |         |       |        |       |      |
|        |                                                                   | 2        | 103.6 | 94.2  | 0.00665 | 0.839 |        |       |      |
|        |                                                                   | XM_00171 |       |       |         |       |        |       |      |
|        |                                                                   | 6372     | 89.9  | 94.9  | 0.00667 | 1.185 |        |       |      |
| MRO    | maestro(MRO)                                                      | NM_0319  |       |       |         |       |        |       |      |
|        | serine peptidase<br>inhibitor, Kunitz type                        | 39       | 106.5 | 115.8 | 0.00679 | 1.332 |        |       |      |
| SPINT1 | 1(SPINT1)                                                         | NM_0037  |       |       |         |       | NM_134 |       |      |
|        | RNA, 5S ribosomal                                                 | 10       | 114.2 | 110.7 | 0.00698 | 0.604 | 372    | 22.51 | 0.03 |
| RNA5S9 | 9(RNA5S9)                                                         | NR_02337 |       |       |         |       |        |       |      |
|        |                                                                   | 1        | 218.1 | 182.1 | 0.00698 | 1.316 |        |       |      |



|          |                                                    |                  |       |       |         |       |
|----------|----------------------------------------------------|------------------|-------|-------|---------|-------|
| c16orf58 | chromosome 16 open reading frame<br>58(C16orf58)   | NM_0227<br>44    | 100.8 | 107.7 | 0.00706 | 1.175 |
| RBBP8    | RB binding protein 8, endonuclease(RBBP8)          | NM_0028<br>94    | 107.6 | 103.9 | 0.00709 | 1.126 |
| NUGGC    | nuclear GTPase, germinal center associated(NUGGC)  | NM_0010<br>10906 | 98.3  | 86.8  | 0.0071  | 0.824 |
| NECTIN1  | nectin cell adhesion molecule 1(NECTIN1)           | XM_00172<br>1670 | 98    | 103.6 | 0.0071  | 1.301 |
| GSKIP    | GSK3B interacting protein(GSKIP)                   | NM_0164<br>72    | 113.8 | 120.3 | 0.00713 | 1.223 |
| CT47A1   | cancer/testis antigen family 47, member A1(CT47A1) | NM_0010<br>80146 | 93.2  | 93.3  | 0.00721 | 1.216 |
| EMC4     | ER membrane protein complex subunit 4(EMC4)        | NM_0010<br>80146 | 101.6 | 99.8  | 0.00721 | 1.167 |
| ZNF398   | zinc finger protein 398(ZNF398)                    | NM_0164<br>54    | 95.5  | 105.9 | 0.00722 | 1.269 |
| ARL5B    | ADP ribosylation factor like GTPase 5B(ARL5B)      | NM_1706<br>86    | 99.8  | 106.7 | 0.00723 | 1.208 |
| DNHD1    | dynein heavy chain domain 1(DNHD1)                 | NM_1788<br>15    | 128.4 | 140   | 0.0073  | 1.332 |
| PRPF40A  | pre-mRNA processing factor 40 homolog A(PRPF40A)   | NM_1735<br>89    | 91.4  | 111   | 0.00735 | 1.379 |
|          |                                                    | NM_0178<br>92    | 102.9 | 107   | 0.00735 | 1.175 |

|         |                                                                 |              |       |       |         |       |              |      |       |
|---------|-----------------------------------------------------------------|--------------|-------|-------|---------|-------|--------------|------|-------|
| UPF3A   | UPF3 regulator of nonsense transcripts homolog A (yeast)(UPF3A) | NM_023011    | 347.5 | 270.1 | 0.00755 | 1.418 |              |      |       |
| NCDN    | neurochondrin(NCDN)                                             | NM_001014839 | 127.3 | 126.2 | 0.00756 | 1.143 |              |      |       |
| OR8J3   | olfactory receptor family 8 subfamily J member 3(OR8J3)         | NM_001004064 | 100.5 | 104.1 | 0.00756 | 1.113 |              |      |       |
|         |                                                                 | XM_928281    | 118.5 | 117.2 | 0.00765 | 1.163 |              |      |       |
| DLGAP4  | DLG associated protein 4(DLGAP4)                                | NM_001042486 | 116   | 92.9  | 0.00777 | 0.799 |              |      |       |
| SNORA12 | small nucleolar RNA, H/ACA box 12(SNORA12)                      | NR_002954    | 110.3 | 100.7 | 0.0079  | 1.243 |              |      |       |
| OVGP1   | oviductal glycoprotein 1(OVGP1)                                 | NM_002557    | 102.4 | 101.3 | 0.00794 | 1.153 |              |      |       |
| EIF1B   | eukaryotic translation initiation factor 1B(EIF1B)              | NM_005875    | 139.4 | 162.7 | 0.00795 | 1.232 |              |      |       |
| EIF1AX  | eukaryotic translation initiation factor 1A, X-linked(EIF1AX)   | NM_001412    | 122.6 | 127   | 0.00795 | 1.232 |              |      |       |
| TSPAN1  | tetraspanin 1(TSPAN1)                                           | NM_005727    | 100.8 | 94.6  | 0.00802 | 0.835 | NM_001031645 | 1.93 | 10.04 |
| RHOT1   | ras homolog family member T1(RHOT1)                             | NM_001033566 | 196.7 | 172.1 | 0.00818 | 1.273 |              |      |       |
| RHOT1   | ras homolog family member T1(RHOT1)                             | NM_001033566 | 316.1 | 331.4 | 0.00818 | 1.273 |              |      |       |

|              |                                                               |                  |       |       |         |       |
|--------------|---------------------------------------------------------------|------------------|-------|-------|---------|-------|
| IP6K1        | inositol<br>hexakisphosphate<br>kinase 1(IP6K1)               | NM_1532<br>73    | 100.8 | 89.3  | 0.00819 | 1.358 |
| IP6K2        | inositol<br>hexakisphosphate<br>kinase 2(IP6K2)               | NM_0010<br>05909 | 320.9 | 350.1 | 0.00819 | 1.358 |
| Snora47      | small nucleolar RNA,<br>H/ACA box<br>47(SNORA47)              | NR_00301<br>4    | 102.4 | 101.7 | 0.00826 | 1.14  |
| SCARN<br>A12 | small Cajal body-<br>specific RNA<br>12(SCARNA12)             | NR_00301<br>0    | 115.5 | 112.6 | 0.00831 | 0.849 |
| CX3CR1       | C-X3-C motif chemokine<br>receptor 1(CX3CR1)                  | NM_0013<br>37    | 94.9  | 106.3 | 0.00831 | 1.225 |
| CXCL10       | C-X-C motif chemokine<br>ligand 10(CXCL10)                    | NM_0015<br>65    | 108.3 | 103.4 | 0.00831 | 1.225 |
| MIR21        | microRNA 21(MIR21)                                            | NR_02949<br>3    | 98.3  | 100.3 | 0.00846 | 0.671 |
| ASCL2        | achaete-scute family<br>bHLH transcription<br>factor 2(ASCL2) | NM_0051<br>70    | 97.6  | 89.5  | 0.0085  | 0.858 |
|              |                                                               | XM_93447<br>1    | 108.4 | 115.5 | 0.00856 | 1.181 |
| fxyd7        | FXYP domain<br>containing ion transport<br>regulator 7(FXYD7) | NM_0220<br>06    | 180.9 | 96.4  | 0.00857 | 1.136 |
| FXYP5        | FXYP domain<br>containing ion transport<br>regulator 5(FXYD5) | NM_1447<br>79    | 113   | 107.7 | 0.00857 | 1.136 |

|           |                                                           |                  |       |       |         |       |                  |       |      |
|-----------|-----------------------------------------------------------|------------------|-------|-------|---------|-------|------------------|-------|------|
|           | eukaryotic translation initiation factor                  | NM_0320          |       |       |         |       |                  |       |      |
| EIF2A     | 2A(EIF2A)                                                 | 25               | 139.4 | 162.7 | 0.00872 | 1.352 |                  |       |      |
| IL21R     | interleukin 21 receptor(IL21R)                            | NM_1810<br>78    | 106.5 | 115.5 | 0.00873 | 1.166 | NM_144<br>748    | 66.99 | 0.14 |
| IL21R     | interleukin 21 receptor(IL21R)                            | NM_1810<br>79    | 114.3 | 113.8 | 0.00873 | 1.166 |                  |       |      |
| DDX19B    | DEAD-box helicase 19B(DDX19B)                             | NM_0010<br>14449 | 219.8 | 201.5 | 0.00874 | 0.834 |                  |       |      |
| DDX19A    | DEAD-box helicase 19A(DDX19A)                             | NM_0183<br>32    | 109   | 114.6 | 0.00874 | 0.834 |                  |       |      |
| ZNF326    | zinc finger protein 326(ZNF326)                           | NM_1829<br>76    | 108.7 | 111.9 | 0.00881 | 1.218 |                  |       |      |
| ZNF326    | zinc finger protein 326(ZNF326)                           | NM_1829<br>76    | 120.3 | 125.4 | 0.00881 | 1.218 |                  |       |      |
|           |                                                           | BX441478         | 85.8  | 80.2  | 0.00884 | 0.821 |                  |       |      |
| ADGRG3    | adhesion G protein-coupled receptor G3(ADGRG3)            | NM_1707<br>76    | 103.4 | 102.1 | 0.00884 | 1.145 |                  |       |      |
| LINC01559 | long intergenic non-protein coding RNA 1559(LINC01559)    | NM_1825<br>58    | 103.4 | 108   | 0.00886 | 1.171 |                  |       |      |
| bcam      | basal cell adhesion molecule (Lutheran blood group)(BCAM) | NM_0055<br>81    | 373.6 | 360.4 | 0.00888 | 1.394 | NM_001<br>107793 | 77.29 | 6.85 |
| C8orf59   | chromosome 8 open reading frame 59(C8orf59)               | NM_0010<br>99672 | 258   | 258.8 | 0.00891 | 0.535 | NM_001<br>107793 | 77.29 | 6.85 |
|           |                                                           | XM_00171<br>5215 | 111.6 | 98.5  | 0.00899 | 0.854 | NM_001<br>107793 | 77.29 | 6.85 |

|        |                                                         |                  |       |       |         |       |                  |       |      |
|--------|---------------------------------------------------------|------------------|-------|-------|---------|-------|------------------|-------|------|
| CEP41  | centrosomal protein<br>41(CEP41)                        | NM_0187<br>18    | 119.8 | 126.7 | 0.00906 | 1.205 | NM_001<br>107793 | 77.29 | 6.85 |
| CEP55  | centrosomal protein<br>55(CEP55)                        | NM_0181<br>31    | 140.2 | 129.6 | 0.00906 | 1.205 |                  |       |      |
| CREBRF | CREB3 regulatory<br>factor(CREBRF)                      | NM_1536<br>07    | 260.6 | 211.6 | 0.00906 | 1.385 |                  |       |      |
| CREBZF | CREB/ATF bZIP<br>transcription<br>factor(CREBZF)        | NM_0010<br>39618 | 332   | 231.8 | 0.00906 | 1.385 |                  |       |      |
|        |                                                         | XM_93902<br>6    | 102.8 | 97.1  | 0.00912 | 0.857 |                  |       |      |
| TONSL  | tonsoku-like, DNA repair<br>protein(TONSL)              | NM_0134<br>32    | 143.4 | 132.6 | 0.00919 | 0.779 |                  |       |      |
| trak1  | trafficking kinesin<br>protein 1(TRAK1)                 | NM_0010<br>42646 | 114.6 | 114.2 | 0.00922 | 1.176 |                  |       |      |
| trak1  | trafficking kinesin<br>protein 1(TRAK1)                 | NM_0010<br>42646 | 131.9 | 136.7 | 0.00922 | 1.176 |                  |       |      |
| TGM5   | transglutaminase<br>5(TGM5)                             | NM_2016<br>31    | 99.9  | 102   | 0.00932 | 1.129 |                  |       |      |
| CHD4   | chromodomain helicase<br>DNA binding protein<br>4(CHD4) | NM_0012<br>73    | 398.3 | 351   | 0.00936 | 0.761 |                  |       |      |
| CHD6   | chromodomain helicase<br>DNA binding protein<br>6(CHD6) | NM_0322<br>21    | 566.9 | 433.9 | 0.00936 | 0.761 |                  |       |      |
| ELK3   | ELK3, ETS transcription<br>factor(ELK3)                 | NM_0052<br>30    | 95.7  | 99.3  | 0.00939 | 1.149 |                  |       |      |
| CPLX2  | complexin 2(CPLX2)                                      | NM_0010<br>08220 | 101.5 | 105.4 | 0.00941 | 1.122 |                  |       |      |

|          |                                                                                                            |              |        |        |         |       |
|----------|------------------------------------------------------------------------------------------------------------|--------------|--------|--------|---------|-------|
| RRBP1    | ribosome binding protein 1(RRBP1)                                                                          | NM_001042576 | 165.2  | 144.5  | 0.00948 | 1.276 |
| RRBP1    | ribosome binding protein 1(RRBP1)                                                                          | NM_001042576 | 314.1  | 310.3  | 0.00948 | 1.276 |
| FBLN1    | fibulin 1(FBLN1)                                                                                           | NM_006486    | 95.7   | 104.7  | 0.00954 | 1.175 |
| ADCK1    | aarF domain containing kinase 1(ADCK1)                                                                     | NM_020421    | 93.2   | 97.5   | 0.00963 | 1.205 |
|          |                                                                                                            | XM_927939    | 121.1  | 106.6  | 0.00977 | 0.835 |
| TENM2    | teneurin transmembrane protein 2(TENM2)                                                                    | NM_001080428 | 108.7  | 106.2  | 0.00979 | 1.127 |
| IL1R2    | interleukin 1 receptor type 2(IL1R2)                                                                       | NM_173343    | 88.6   | 97.1   | 0.00982 | 1.254 |
| TCP10L   | t-complex 10-like(TCP10L)                                                                                  | NM_018277    | 93.8   | 88.8   | 0.00984 | 0.841 |
| c6orf106 | chromosome 6 open reading frame 106(C6orf106)                                                              | NM_024294    | 117.8  | 106.5  | 0.00985 | 0.906 |
| PTP4A1   | protein tyrosine phosphatase type IVA, member 1(PTP4A1)                                                    | NM_003463    | 101.6  | 106.9  | 0.0099  | 1.142 |
| RPL37A   | ribosomal protein L37a(RPL37A)                                                                             | NM_000998    | 4299.1 | 3407.7 | 0.00991 | 0.783 |
| SMARCD3  | SWI/SNF related, matrix associated, actin dependent regulator of chromatin, subfamily d, member 3(SMARCD3) | NM_003078    | 93.2   | 100.2  | 0.00993 | 1.137 |

|         |                                                                           |                           |       |       |         |       |                  |       |      |
|---------|---------------------------------------------------------------------------|---------------------------|-------|-------|---------|-------|------------------|-------|------|
| FREM2   | FRAS1 related<br>extracellular matrix<br>protein 2(FREM2)                 | NM_2073<br>61             | 94.1  | 101.8 | 0.01002 | 1.153 |                  |       |      |
|         |                                                                           | XM_93029<br>2             | 114.3 | 97.8  | 0.01016 | 0.849 |                  |       |      |
|         |                                                                           | DR980429<br>XM_94182<br>1 | 95.6  | 90.7  | 0.01018 | 0.842 |                  |       |      |
|         |                                                                           | XR_01956<br>7             | 100.1 | 107.3 | 0.01025 | 1.086 |                  |       |      |
|         |                                                                           |                           | 104.9 | 106.3 | 0.01035 | 1.185 |                  |       |      |
| TTLL11  | tubulin tyrosine ligase<br>like 11(TTLL11)                                | NM_1942<br>52             | 110.2 | 96.6  | 0.01037 | 0.855 |                  |       |      |
| AGAP3   | ArfGAP with GTPase<br>domain, ankyrin repeat<br>and PH domain<br>3(AGAP3) | NM_0010<br>42535          | 106   | 126.3 | 0.01043 | 1.231 |                  |       |      |
| L3HYPDH | trans-L-3-hydroxyproline<br>dehydratase(L3HYPDH)                          | NM_1445<br>81             | 116.3 | 116.2 | 0.01044 | 1.189 |                  |       |      |
| L3MBTL2 | L3MBTL2 polycomb<br>repressive complex 1<br>subunit(L3MBTL2)              | NM_0314<br>88             | 121   | 118.6 | 0.01044 | 1.189 |                  |       |      |
| UBE3A   | ubiquitin protein ligase<br>E3A(UBE3A)                                    | NM_0004<br>62             | 219.6 | 191.4 | 0.01045 | 1.246 |                  |       |      |
| UBE3A   | ubiquitin protein ligase<br>E3A(UBE3A)                                    | NM_0004<br>62             | 504.6 | 507.7 | 0.01045 | 1.246 |                  |       |      |
| C1QTNF6 | C1q and tumor necrosis<br>factor related protein<br>6(C1QTNF6)            | NM_0319<br>10             | 99.7  | 105   | 0.01046 | 1.112 | NM_001<br>009603 | 28.32 | 0.90 |

| C1q and tumor necrosis |                                                        |           |       |       |         |       |
|------------------------|--------------------------------------------------------|-----------|-------|-------|---------|-------|
| C1QTNF6                | factor related protein 6(C1QTNF6)                      | NM_182486 | 110.2 | 93.5  | 0.01046 | 1.112 |
| RSPH9                  | radial spoke head 9 homolog(RSPH9)                     | NM_152732 | 98.3  | 93.2  | 0.01049 | 0.828 |
| RDH10                  | retinol dehydrogenase 10 (all-trans)(RDH10)            | NM_172037 | 197.6 | 344   | 0.01056 | 1.664 |
| SNRPD3                 | small nuclear ribonucleoprotein D3 polypeptide(SNRPD3) | NM_004175 | 207.8 | 217.9 | 0.01057 | 1.603 |
| RAB13                  | RAB13, member RAS oncogene family(RAB13)               | NM_002870 | 113   | 113   | 0.01059 | 1.16  |
| DBT                    | dihydrolipoamide branched chain transacylase E2(DBT)   | NM_001918 | 94.8  | 99.7  | 0.0106  | 1.173 |
| DCAF1                  | DDB1 and CUL4 associated factor 1(DCAF1)               | NM_014703 | 527   | 473.7 | 0.0106  | 1.173 |
|                        |                                                        | BX114974  | 99.5  | 104   | 0.01064 | 1.196 |
|                        |                                                        | XM_938867 | 97.7  | 91.2  | 0.01069 | 0.881 |
| BZW1                   | basic leucine zipper and W2 domains 1(BZW1)            | NM_014670 | 97.8  | 104.5 | 0.01076 | 1.195 |
| BZW2                   | basic leucine zipper and W2 domains 2(BZW2)            | NM_014038 | 109.2 | 104.1 | 0.01076 | 1.195 |
| GPN1                   | GPN-loop GTPase 1(GPN1)                                | NM_007266 | 137.4 | 156.4 | 0.01078 | 0.819 |



|          |                                                              |                  |       |       |         |       |
|----------|--------------------------------------------------------------|------------------|-------|-------|---------|-------|
| GPM6B    | glycoprotein<br>M6B(GPM6B)                                   | NM_0010<br>01995 | 91.1  | 87.2  | 0.01078 | 0.819 |
| MMP19    | matrix metalloproteinase<br>19(MMP19)                        | NM_0024<br>29    | 98.9  | 88.4  | 0.01079 | 0.881 |
| TUBG1    | tubulin gamma<br>1(TUBG1)                                    | NM_0010<br>70    | 102.4 | 109.8 | 0.01092 | 0.756 |
| TUBG1    | tubulin gamma<br>1(TUBG1)                                    | NM_0010<br>70    | 129.5 | 109.9 | 0.01092 | 0.756 |
| TUBG1    | tubulin gamma<br>1(TUBG1)                                    | NM_0010<br>70    | 164.4 | 186.6 | 0.01092 | 0.756 |
| SIM1     | single-minded family<br>bHLH transcription<br>factor 1(SIM1) | NM_0050<br>68    | 104.1 | 95.8  | 0.01096 | 0.791 |
| slc26a6  | solute carrier family 26<br>member 6(SLC26A6)                | NM_1344<br>26    | 99.6  | 106.9 | 0.011   | 1.275 |
| slc26a6  | solute carrier family 26<br>member 6(SLC26A6)                | NM_1344<br>26    | 112.5 | 122.8 | 0.011   | 1.275 |
| prb1     | proline rich protein BstNI<br>subfamily 1(PRB1)              | NM_1993<br>54    | 94.5  | 102.6 | 0.01106 | 1.151 |
| CTNNB1   | catenin beta 1(CTNNB1)                                       | NM_0010<br>98209 | 96.5  | 96.4  | 0.01106 | 1.239 |
| CTNNB1   | catenin beta 1(CTNNB1)                                       | NM_0010<br>98209 | 148.2 | 145.9 | 0.01106 | 1.239 |
| CTNNBIP1 | catenin beta interacting<br>protein 1(CTNNBIP1)              | NM_0202<br>48    | 154   | 164.5 | 0.01106 | 1.239 |
| C6orf1   | chromosome 6 open<br>reading frame 1(C6orf1)                 | NM_0010<br>08704 | 107.5 | 105.3 | 0.01112 | 1.242 |
|          |                                                              | AW18238<br>5     | 95    | 81.2  | 0.01119 | 0.821 |

|         |                                                                       |           |       |       |         |       |
|---------|-----------------------------------------------------------------------|-----------|-------|-------|---------|-------|
| BAGE2   | B melanoma antigen family member 2(BAGE2)                             | NM_182482 | 170.4 | 172.4 | 0.01119 | 1.245 |
| TTC16   | tetratricopeptide repeat domain 16(TTC16)                             | NM_144965 | 109.5 | 105.2 | 0.0112  | 1.156 |
| PIGM    | phosphatidylinositol glycan anchor biosynthesis class M(PIGM)         | NM_145167 | 112.7 | 92.8  | 0.01129 | 0.797 |
| KDM5D   | lysine demethylase 5D(KDM5D)                                          | NM_004653 | 241   | 203.4 | 0.01132 | 1.415 |
| CCPG1   | cell cycle progression 1(CCPG1)                                       | NM_020739 | 272.5 | 284.1 | 0.01138 | 1.444 |
| Irch4   | leucine rich repeats and calponin homology domain containing 4(LRCH4) | NM_002319 | 99.8  | 86.4  | 0.01141 | 0.856 |
|         |                                                                       | XM_938802 | 108.6 | 109.8 | 0.01146 | 1.222 |
| UGGT2   | UDP-glucose glycoprotein glucosyltransferase 2(UGGT2)                 | NM_020121 | 139.4 | 123.4 | 0.01154 | 0.84  |
| c5orf30 | chromosome 5 open reading frame 30(C5orf30)                           | NM_033211 | 129.9 | 119.6 | 0.01179 | 0.877 |
| MAPK7   | mitogen-activated protein kinase 7(MAPK7)                             | NM_139032 | 107.2 | 99.7  | 0.01189 | 0.85  |

|           |                                                                    |              |       |       |         |       |
|-----------|--------------------------------------------------------------------|--------------|-------|-------|---------|-------|
| MAPK8IP1  | mitogen-activated protein kinase 8 interacting protein 1(MAPK8IP1) | NM_005456    | 126.5 | 107.4 | 0.01189 | 0.85  |
|           |                                                                    | XM_927142    | 112.5 | 105.4 | 0.01196 | 1.174 |
|           |                                                                    | CR748464     | 100   | 101.4 | 0.01198 | 1.13  |
| MBP       | myelin basic protein(MBP)                                          | NM_001025101 | 158   | 179.2 | 0.01202 | 1.301 |
| CAB39L    | calcium binding protein 39 like(CAB39L)                            | NM_001079670 | 96.5  | 98.9  | 0.01209 | 1.176 |
|           |                                                                    | XM_938374    | 85.8  | 98.5  | 0.01209 | 1.231 |
| TBRG4     | transforming growth factor beta regulator 4(TBRG4)                 | NM_004749    | 117   | 101   | 0.0121  | 0.866 |
| EGF       | epidermal growth factor(EGF)                                       | NM_001963    | 119.3 | 109.3 | 0.01217 | 0.816 |
| SQLE      | squalene epoxidase(SQLE)                                           | NM_003129    | 91.9  | 95.3  | 0.01224 | 0.779 |
| SQLE      | squalene epoxidase(SQLE)                                           | NM_003129    | 99.5  | 94.2  | 0.01224 | 0.779 |
|           |                                                                    | XM_001713809 | 664.9 | 830.1 | 0.01224 | 2.787 |
| Hist1h2bk | histone cluster 1 H2B family member k(HIST1H2BK)                   | NM_080593    | 97.5  | 102   | 0.01226 | 1.157 |

|           |                                                            |              |       |       |         |       |
|-----------|------------------------------------------------------------|--------------|-------|-------|---------|-------|
| UAP1L1    | UDP-N-acetylglucosamine pyrophosphorylase 1 like 1(UAP1L1) | NM_207309    | 109.2 | 112.3 | 0.01228 | 1.172 |
|           |                                                            | XM_001723218 | 92.1  | 88.6  | 0.01229 | 0.87  |
| NUFIP2    | NUFIP2, FMR1 interacting protein 2(NUFIP2)                 | NM_020772    | 158.4 | 138.3 | 0.0123  | 1.382 |
| NUFIP2    | NUFIP2, FMR1 interacting protein 2(NUFIP2)                 | NM_020772    | 341.6 | 290.4 | 0.0123  | 1.382 |
| IVNS1A BP | influenza virus NS1A binding protein(IVNS1ABP)             | NM_006469    | 100.2 | 106   | 0.01234 | 1.172 |
| ADGRL2    | adhesion G protein-coupled receptor L2(ADGRL2)             | NM_012302    | 96.7  | 104.6 | 0.01237 | 1.182 |
| ALX3      | ALX homeobox 3(ALX3)                                       | NM_006492    | 110.5 | 116.8 | 0.01242 | 0.513 |
| ALX1      | ALX homeobox 1(ALX1)                                       | NM_006982    | 98.4  | 99.8  | 0.01242 | 0.513 |
| MATN4     | matrilin 4(MATN4)                                          | NM_030592    | 85.9  | 85.7  | 0.01245 | 0.817 |
| MATN4     | matrilin 4(MATN4)                                          | NM_030592    | 89    | 88.4  | 0.01245 | 0.817 |
| TNFRSF10B | TNF receptor superfamily member 10b(TNFRSF10B)             | NM_003842    | 90    | 103.7 | 0.01247 | 1.21  |

|           |                                                       |              |       |       |         |       |
|-----------|-------------------------------------------------------|--------------|-------|-------|---------|-------|
| TNFRSF10B | TNF receptor superfamily member 10b(TNFRSF10B)        | NM_003842    | 98.4  | 95    | 0.01247 | 1.21  |
| ITM2A     | integral membrane protein 2A(ITM2A)                   | NM_004867    | 84.9  | 92.9  | 0.01249 | 1.152 |
| MRPL35    | mitochondrial ribosomal protein L35(MRPL35)           | NM_145644    | 498.9 | 558.5 | 0.01249 | 1.371 |
| GSTM1     | glutathione S-transferase mu 1(GSTM1)                 | NM_000561    | 98.3  | 90.7  | 0.01251 | 0.89  |
| SMIM10L2B | small integral membrane protein 10 like 2B(SMIM10L2B) | NR_024493    | 98.7  | 102.4 | 0.01253 | 1.142 |
|           |                                                       | XM_944438    | 93.3  | 96    | 0.01258 | 1.187 |
| PCYOX1L   | prenylcysteine oxidase 1 like(PCYOX1L)                | NM_024028    | 96    | 92.3  | 0.01264 | 0.885 |
| Snora2b   | small nucleolar RNA, H/ACA box 2B(SNORA2B)            | NR_002951    | 136   | 122.9 | 0.01265 | 1.285 |
|           |                                                       | XR_018309    | 94.4  | 87.4  | 0.01274 | 0.758 |
|           |                                                       | NM_001004302 | 96.2  | 94.7  | 0.01278 | 0.831 |
|           |                                                       | XR_015695    | 104.4 | 93.5  | 0.01282 | 0.862 |
|           |                                                       | XR_001498    | 97.8  | 105   | 0.01286 | 1.243 |
|           |                                                       | XM_931141    | 96.3  | 100.6 | 0.01286 | 1.149 |

|         |                                                                    |              |        |        |         |       |
|---------|--------------------------------------------------------------------|--------------|--------|--------|---------|-------|
| DNMT3L  | DNA methyltransferase 3 like(DNMT3L)                               | NM_013369    | 114.9  | 114.2  | 0.01288 | 1.141 |
| DNMT3B  | DNA methyltransferase 3 beta(DNMT3B)                               | NM_006892    | 86.8   | 90.6   | 0.01288 | 1.141 |
|         |                                                                    | XR_039041    | 3488.4 | 2355.4 | 0.01288 | 0.812 |
|         |                                                                    | DA572372     | 92.6   | 101.7  | 0.01293 | 1.163 |
| EIF2AK1 | eukaryotic translation initiation factor 2 alpha kinase 1(EIF2AK1) | NM_014413    | 522.9  | 441.4  | 0.01296 | 0.753 |
| ZSCAN32 | zinc finger and SCAN domain containing 32(ZSCAN32)                 | NM_017810    | 111.9  | 107.1  | 0.01299 | 1.171 |
| NFASC   | neurofascin(NFASC)                                                 | NM_001005387 | 98.2   | 92.2   | 0.01303 | 0.902 |
| CSMD1   | CUB and Sushi multiple domains 1(CSMD1)                            | NM_033225    | 127.1  | 119.8  | 0.01306 | 0.804 |
|         |                                                                    | XR_037583    | 100.9  | 103.8  | 0.01316 | 1.08  |
| MAVS    | mitochondrial antiviral signaling protein(MAVS)                    | NM_020746    | 108.1  | 92.9   | 0.01321 | 0.85  |
|         |                                                                    | AW297854     | 97.9   | 93.4   | 0.01335 | 0.879 |
| SLC35F1 | solute carrier family 35 member F1(SLC35F1)                        | NM_001029858 | 96.2   | 105.8  | 0.01344 | 1.163 |
|         |                                                                    | AI873192     | 127.3  | 108.1  | 0.01344 | 0.64  |
| MRPL53  | mitochondrial ribosomal protein L53(MRPL53)                        | NM_053050    | 155.2  | 157.6  | 0.01346 | 1.285 |

|              |                                                                |              |       |       |         |       |           |            |
|--------------|----------------------------------------------------------------|--------------|-------|-------|---------|-------|-----------|------------|
|              |                                                                | BX116001     | 97.4  | 106.1 | 0.01352 | 1.171 |           |            |
| LOC102724002 | uncharacterized<br>LOC102724002(LOC102724002)                  |              |       |       |         |       |           |            |
|              |                                                                | AK025166     | 99.7  | 96.9  | 0.01354 | 0.887 |           |            |
|              |                                                                | XM_370758    | 115.6 | 105.4 | 0.01357 | 0.913 |           |            |
| DCUN1D4      | defective in cullin neddylation 1 domain containing 4(DCUN1D4) | NM_015115    | 177.1 | 187.7 | 0.01363 | 1.296 |           |            |
|              |                                                                | NM_001015047 | 100.2 | 108.3 | 0.01365 | 1.154 |           |            |
| SNORA2C      | small nucleolar RNA, H/ACA box 2C(SNORA2C)                     | NR_002968    | 102.5 | 91.1  | 0.01367 | 0.879 | NM_144744 | 0.11 40.01 |
|              |                                                                | XM_930670    | 122.4 | 128.8 | 0.01372 | 1.364 |           |            |
| Mir574       | microRNA 574(MIR574)                                           | NR_030300    | 102.3 | 94.5  | 0.01377 | 0.783 |           |            |
| DENR         | density regulated re-initiation and release factor(DENR)       | NM_003677    | 155.7 | 149.2 | 0.01383 | 1.226 |           |            |
| DEPDC5       | DEP domain containing 5(DEPDC5)                                | NM_001007188 | 843.8 | 567.2 | 0.01383 | 1.226 |           |            |
| ARL17A       | ADP ribosylation factor like GTPase 17A(ARL17A)                | NM_016632    | 163.2 | 163.5 | 0.01388 | 1.274 |           |            |
|              |                                                                | XM_928111    | 92.5  | 99.8  | 0.01393 | 1.106 |           |            |
| SLFN11       | schlafen family member 11(SLFN11)                              | NM_152270    | 102.7 | 95.7  | 0.01394 | 0.876 |           |            |

|        |                                                                                    |               |        |        |         |       |
|--------|------------------------------------------------------------------------------------|---------------|--------|--------|---------|-------|
| SLFN11 | schlafen family member<br>11(SLFN11)                                               | NM_1522<br>70 | 108.1  | 107.6  | 0.01394 | 0.876 |
| SMN1   | survival of motor neuron<br>1, telomeric(SMN1)                                     | NM_0003<br>44 | 98     | 105.1  | 0.01394 | 1.181 |
| PTPN23 | protein tyrosine<br>phosphatase, non-<br>receptor type<br>23(PTPN23)               | NM_0154<br>66 | 106.7  | 107.7  | 0.01397 | 1.191 |
| OFD1   | OFD1, centriole and<br>centriolar satellite<br>protein(OFD1)                       | NM_0036<br>11 | 105.5  | 108.9  | 0.01399 | 1.156 |
| HSCB   | HscB mitochondrial iron-<br>sulfur cluster<br>cochaperone(HSCB)                    | NM_1720<br>02 | 95.2   | 92.9   | 0.01421 | 0.877 |
| NEDD8  | neural precursor cell<br>expressed,<br>developmentally down-<br>regulated 8(NEDD8) | NM_0061<br>56 | 231.6  | 239.3  | 0.01424 | 0.742 |
| NEDD8  | neural precursor cell<br>expressed,<br>developmentally down-<br>regulated 8(NEDD8) | NM_0061<br>56 | 1873.4 | 1679.1 | 0.01424 | 0.742 |
| ARID4B | AT-rich interaction<br>domain 4B(ARID4B)                                           | NM_0163<br>74 | 127.9  | 108.8  | 0.01428 | 1.674 |
| ARID4B | AT-rich interaction<br>domain 4B(ARID4B)                                           | NM_0163<br>74 | 210.3  | 153.7  | 0.01428 | 1.674 |
| ARID4B | AT-rich interaction<br>domain 4B(ARID4B)                                           | NM_0163<br>74 | 430.2  | 318.2  | 0.01428 | 1.674 |



|         |                                                          |              |       |       |         |       |
|---------|----------------------------------------------------------|--------------|-------|-------|---------|-------|
|         | endoplasmic reticulum oxidoreductase 1                   | NM_0198      |       |       |         |       |
| ERO1B   | beta(ERO1B)                                              | 91           | 108.7 | 92.1  | 0.01431 | 0.832 |
|         | rhomboid like                                            | NM_1383      |       |       |         |       |
| RHBDL3  | 3(RHBDL3)                                                | 28           | 141.9 | 115.2 | 0.01436 | 0.808 |
|         | GON7, KEOPS complex subunit homolog(GON7)                | NM_0324      |       |       |         |       |
| GON7    |                                                          | 90           | 97.7  | 103.8 | 0.01446 | 1.223 |
|         | angiopoietin like                                        | NM_0211      |       |       |         |       |
| ANGPTL7 | 7(ANGPTL7)                                               | 46           | 109.6 | 97.3  | 0.01447 | 0.873 |
|         | pleckstrin homology like domain family A                 | NM_0073      |       |       |         |       |
| PHLDA1  | member 1(PHLDA1)                                         | 50           | 99.5  | 105.4 | 0.01451 | 0.745 |
|         | pleckstrin homology like domain family A                 | NM_0073      |       |       |         |       |
| PHLDA1  | member 1(PHLDA1)                                         | 50           | 157.6 | 155.9 | 0.01451 | 0.745 |
|         | v-mos Moloney murine sarcoma viral oncogene homolog(MOS) | NM_0053      |       |       |         |       |
| MOS     |                                                          | 72           | 92.4  | 89.7  | 0.01457 | 0.899 |
|         |                                                          | XM_001130102 | 122.6 | 117.7 | 0.01466 | 1.189 |
|         | cysteine and glycine rich protein 2(CSRP2)               | NM_0013      |       |       |         |       |
| CSRP2   |                                                          | 21           | 102.3 | 91.5  | 0.01466 | 0.903 |
|         | nectin cell adhesion molecule 3(NECTIN3)                 | NM_0154      |       |       |         |       |
| NECTIN3 |                                                          | 80           | 145.6 | 166.7 | 0.0148  | 1.412 |
|         | nectin cell adhesion molecule 3(NECTIN3)                 | NM_0154      |       |       |         |       |
| NECTIN3 |                                                          | 80           | 179.6 | 197.3 | 0.0148  | 1.412 |
|         |                                                          | XM_001720754 | 96.1  | 102.4 | 0.01485 | 1.108 |

|              |                                                          |              |       |       |         |       |
|--------------|----------------------------------------------------------|--------------|-------|-------|---------|-------|
|              | uncharacterized                                          |              |       |       |         |       |
| LOC105372672 | LOC105372672(LOC105372672)                               | AW661821     | 113.6 | 99.2  | 0.01499 | 0.821 |
|              |                                                          | BX107471     | 92.6  | 90.4  | 0.01502 | 0.863 |
| KIF5C        | kinesin family member 5C(KIF5C)                          | NM_004522    | 111.7 | 110.1 | 0.01506 | 0.881 |
| mri1         | methylthioribose-1-phosphate isomerase 1(MRI1)           | NM_001031727 | 118.3 | 118.3 | 0.01512 | 1.33  |
| mri1         | methylthioribose-1-phosphate isomerase 1(MRI1)           | NM_001031727 | 126.3 | 142.2 | 0.01512 | 1.33  |
|              |                                                          | XR_039704    | 100.4 | 90.1  | 0.01516 | 0.84  |
| LENG8        | leukocyte receptor cluster member 8(LENG8)               | NM_052925    | 125.4 | 100.3 | 0.01521 | 0.779 |
| FRS3         | fibroblast growth factor receptor substrate 3(FRS3)      | NM_006653    | 187.5 | 189.9 | 0.01526 | 1.243 |
| MIR657       | microRNA 657(MIR657)                                     | NR_030394    | 91.8  | 97.2  | 0.01527 | 1.278 |
|              |                                                          | XM_001726567 | 139.6 | 137   | 0.01529 | 0.795 |
| C1QTNF1      | C1q and tumor necrosis factor related protein 1(C1QTNF1) | NM_198593    | 101   | 105.7 | 0.01536 | 1.14  |
| C1QTNF1      | C1q and tumor necrosis factor related protein 1(C1QTNF1) | NM_198594    | 139   | 133.4 | 0.01536 | 1.14  |

|        |                                            |              |        |        |         |       |
|--------|--------------------------------------------|--------------|--------|--------|---------|-------|
| DAPL1  | death associated protein like 1(DAPL1)     | NM_001017920 | 159.5  | 127.5  | 0.01541 | 0.71  |
| RBM6   | RNA binding motif protein 6(RBM6)          | NM_005777    | 123.5  | 101.2  | 0.01542 | 0.864 |
| ARSB   | arylsulfatase B(ARSB)                      | NM_000046    | 118.4  | 123.1  | 0.01544 | 1.227 |
| UBN2   | ubiquitin 2(UBN2)                          | NM_173569    | 153.5  | 130.9  | 0.01546 | 0.853 |
| UBN2   | ubiquitin 2(UBN2)                          | NM_173569    | 242.7  | 199.3  | 0.01546 | 0.853 |
| EPS8L3 | EPS8 like 3(EPS8L3)                        | NM_139053    | 91     | 83.7   | 0.01554 | 0.862 |
| MAPT   | microtubule associated protein tau(MAPT)   | NM_016834    | 148.3  | 128.8  | 0.01556 | 0.786 |
| AGFG2  | ArfGAP with FG repeats 2(AGFG2)            | NM_006076    | 183.1  | 177.2  | 0.0156  | 1.351 |
| MIR571 | microRNA 571(MIR571)                       | NR_030297    | 105.3  | 106.7  | 0.01567 | 1.114 |
| SF3B1  | splicing factor 3b subunit 1(SF3B1)        | NM_012433    | 148.3  | 148.7  | 0.01586 | 1.302 |
| SF3B1  | splicing factor 3b subunit 1(SF3B1)        | NM_012433    | 636.6  | 434.5  | 0.01586 | 1.302 |
| GALE   | UDP-galactose-4-epimerase(GALE)            | NM_000403    | 98.9   | 102.7  | 0.0159  | 1.194 |
| RANBP3 | RAN binding protein 3(RANBP3)              | NM_003624    | 101.5  | 97.4   | 0.01593 | 1.132 |
| RANBP3 | RAN binding protein 3(RANBP3)              | NM_003624    | 102.5  | 105.1  | 0.01593 | 1.132 |
| UBE2D3 | ubiquitin conjugating enzyme E2 D3(UBE2D3) | NM_181890    | 1623.6 | 1372.6 | 0.01594 | 1.335 |

|         |                                                            |              |         |         |         |       |
|---------|------------------------------------------------------------|--------------|---------|---------|---------|-------|
| UBE2D3  | ubiquitin conjugating enzyme E2 D3(UBE2D3)                 | NM_181890    | 2032.9  | 1807.8  | 0.01594 | 1.335 |
| BPTF    | bromodomain PHD finger transcription factor(BPTF)          | NM_004459    | 93.9    | 96.4    | 0.01602 | 1.24  |
| FAM220A | family with sequence similarity 220 member A(FAM220A)      | NM_001037163 | 104     | 93.3    | 0.01602 | 0.894 |
| LAIR1   | leukocyte associated immunoglobulin like receptor 1(LAIR1) | NM_021706    | 118     | 114.2   | 0.01603 | 1.234 |
| LAMA2   | laminin subunit alpha 2(LAMA2)                             | NM_000426    | 17263.4 | 17310.7 | 0.01603 | 1.234 |
|         |                                                            | AI341386     | 101.5   | 119     | 0.01616 | 1.28  |
| TMEM217 | transmembrane protein 217(TMEM217)                         | NM_145316    | 99.8    | 106.4   | 0.01617 | 1.149 |
| TMEM217 | transmembrane protein 217(TMEM217)                         | NM_145316    | 142.5   | 140.2   | 0.01617 | 1.149 |
| PARP16  | poly(ADP-ribose) polymerase family member 16(PARP16)       | NM_017851    | 104.5   | 99.1    | 0.01623 | 0.851 |
| TOP3A   | topoisomerase (DNA) III alpha(TOP3A)                       | NM_004618    | 93.7    | 91.8    | 0.01623 | 0.799 |
| TOP3A   | topoisomerase (DNA) III alpha(TOP3A)                       | NM_004618    | 108.4   | 96.4    | 0.01623 | 0.799 |
| BCL2L11 | BCL2 like 11(BCL2L11)                                      | NM_006538    | 98.4    | 103.9   | 0.0163  | 1.193 |
|         |                                                            | BX097731     | 101.5   | 107.1   | 0.01631 | 1.172 |
|         |                                                            | CR619250     | 95.1    | 99.3    | 0.01637 | 1.159 |

|         |                                                                  |           |       |       |         |       |
|---------|------------------------------------------------------------------|-----------|-------|-------|---------|-------|
| CNRIP1  | cannabinoid receptor interacting protein 1(CNRIP1)               | NM_015463 | 102.1 | 91.2  | 0.0164  | 0.87  |
| RBM41   | RNA binding motif protein 41(RBM41)                              | NM_018301 | 154.8 | 157.6 | 0.01644 | 1.28  |
| SAMD9   | sterile alpha motif domain containing 9(SAMD9)                   | NM_017654 | 91.4  | 87.8  | 0.01646 | 0.84  |
| ZNF467  | zinc finger protein 467(ZNF467)                                  | NM_207336 | 185.3 | 202.1 | 0.01655 | 1.278 |
| DDX10   | DEAD-box helicase 10(DDX10)                                      | NM_004398 | 101.9 | 87.7  | 0.0166  | 0.838 |
| LUC7L   | LUC7 like(LUC7L)                                                 | NM_018032 | 160.1 | 144.7 | 0.01666 | 0.858 |
| POLR1B  | RNA polymerase I subunit B(POLR1B)                               | NM_019014 | 103.4 | 92.7  | 0.01669 | 0.864 |
| LGALS12 | galectin 12(LGALS12)                                             | NM_033101 | 100.6 | 105.3 | 0.01674 | 1.14  |
| cyb5r3  | cytochrome b5 reductase 3(CYB5R3)                                | NM_000398 | 113.2 | 106.6 | 0.01675 | 0.887 |
| FAM86JP | family with sequence similarity 86, member A pseudogene(FAM86JP) | NR_024250 | 96.9  | 102.5 | 0.01686 | 1.163 |
| DHX40   | DEAH-box helicase 40(DHX40)                                      | NM_024612 | 117.9 | 110.1 | 0.01687 | 0.864 |
| DHX40   | DEAH-box helicase 40(DHX40)                                      | NM_024612 | 139   | 137.6 | 0.01687 | 0.864 |
| DHX40   | DEAH-box helicase 40(DHX40)                                      | NM_024612 | 169.3 | 171.4 | 0.01687 | 0.864 |

|             |                                                                       |                  |         |         |         |       |
|-------------|-----------------------------------------------------------------------|------------------|---------|---------|---------|-------|
|             | eukaryotic translation<br>initiation factor 2 subunit<br>beta(EIF2S2) | NM_0039<br>08    | 223.4   | 241     | 0.0169  | 1.26  |
| EIF2S2      |                                                                       |                  |         |         |         |       |
|             | XK related 9(XKR9)                                                    | NM_0010<br>11720 | 109.2   | 93.9    | 0.01692 | 0.874 |
| XKR9        |                                                                       |                  |         |         |         |       |
|             | PDZ domain containing<br>8(PDZD8)                                     | NM_1737<br>91    | 285.2   | 267.9   | 0.01699 | 1.213 |
| PDZD8       |                                                                       |                  |         |         |         |       |
|             | nuclear transcription<br>factor, X-box binding<br>1(NFX1)             | NM_1471<br>34    | 107.6   | 102.5   | 0.017   | 1.131 |
| NFX1        |                                                                       |                  |         |         |         |       |
|             | PHD finger protein<br>14(PHF14)                                       | NM_0146<br>60    | 100.5   | 101.6   | 0.01705 | 1.088 |
| PHF14       |                                                                       |                  |         |         |         |       |
|             | zinc finger protein 658B<br>(pseudogene)(ZNF658B<br>)                 | NM_0010<br>32297 | 107.5   | 115.7   | 0.01713 | 1.186 |
| ZNF658<br>B |                                                                       |                  |         |         |         |       |
|             |                                                                       | XM_00172<br>1880 | 101.2   | 98.2    | 0.0172  | 1.153 |
|             |                                                                       |                  |         |         |         |       |
|             |                                                                       | XM_00172<br>1880 | 177.7   | 157.5   | 0.0172  | 1.153 |
|             |                                                                       |                  |         |         |         |       |
|             | F-box and WD repeat<br>domain containing<br>4(FBXW4)                  | NM_0220<br>39    | 111.1   | 114.8   | 0.01739 | 1.195 |
| FBXW4       |                                                                       |                  |         |         |         |       |
|             | EF-hand calcium<br>binding domain<br>13(EFCAB13)                      | NM_1523<br>47    | 96.7    | 96.1    | 0.01742 | 1.122 |
| Efcab13     |                                                                       |                  |         |         |         |       |
|             | leukocyte<br>immunoglobulin like<br>receptor B3(LILRB3)               | NM_0068<br>64    | 129.4   | 93      | 0.01748 | 1.248 |
| LILRB3      |                                                                       |                  |         |         |         |       |
|             | leukocyte<br>immunoglobulin like<br>receptor B4(LILRB4)               | NM_0010<br>81438 | 14279.9 | 13030.4 | 0.01748 | 1.248 |
| LILRB4      |                                                                       |                  |         |         |         |       |

|               |                                                               |               |       |       |         |       |
|---------------|---------------------------------------------------------------|---------------|-------|-------|---------|-------|
| RNA28S<br>5   | RNA, 28S ribosomal<br>5(RNA28S5)                              | NR_00328<br>7 | 371.8 | 466.3 | 0.01766 | 2.305 |
| RNA28S<br>5   | RNA, 28S ribosomal<br>5(RNA28S5)                              | NR_00328<br>7 | 769.5 | 878.2 | 0.01766 | 2.305 |
| STRN          | striatin(STRN)                                                | NM_0031<br>62 | 118.2 | 110.9 | 0.01769 | 0.808 |
|               |                                                               | AI239861      | 98.5  | 102.5 | 0.01771 | 1.116 |
| CSNK1D        | casein kinase 1<br>delta(CSNK1D)                              | NM_1390<br>62 | 256   | 242.1 | 0.01774 | 1.437 |
| LINC010<br>18 | long intergenic non-<br>protein coding RNA<br>1018(LINC01018) | NR_02442<br>4 | 106.9 | 97.3  | 0.01782 | 1.181 |
| LINC010<br>11 | long intergenic non-<br>protein coding RNA<br>1011(LINC01011) | NM_2074<br>95 | 99.4  | 104.9 | 0.01782 | 1.181 |
| PSMD3         | proteasome 26S<br>subunit, non-ATPase<br>3(PSMD3)             | NM_0028<br>09 | 106.3 | 90.9  | 0.01784 | 0.866 |
| TMEM80        | transmembrane protein<br>80(TMEM80)                           | NM_1749<br>40 | 135.9 | 123.3 | 0.01799 | 0.722 |
| COG4          | component of oligomeric<br>golgi complex 4(COG4)              | NM_0153<br>86 | 146.6 | 122   | 0.01803 | 0.77  |
| COG3          | component of oligomeric<br>golgi complex 3(COG3)              | NM_0314<br>31 | 137.6 | 123.3 | 0.01803 | 0.77  |
|               |                                                               | XM_93952<br>1 | 105.4 | 106.4 | 0.01806 | 1.097 |
|               |                                                               | DR980387      | 89.4  | 98.9  | 0.01823 | 1.166 |

|         |                                                       |              |       |        |         |       |
|---------|-------------------------------------------------------|--------------|-------|--------|---------|-------|
| GNB1L   | G protein subunit beta 1 like(GNB1L)                  | NM_053004    | 100.1 | 93.4   | 0.01826 | 1.126 |
|         |                                                       | XM_930349    | 85.2  | 82     | 0.0183  | 0.865 |
|         |                                                       | XM_936804    | 109.4 | 104.4  | 0.01837 | 0.78  |
| ALOX12B | arachidonate 12-lipoxygenase, 12R type(ALOX12B)       | NM_001139    | 102.3 | 103    | 0.01837 | 1.172 |
| ZNF654  | zinc finger protein 654(ZNF654)                       | NM_018293    | 94.7  | 96.7   | 0.01839 | 1.158 |
| ZNF654  | zinc finger protein 654(ZNF654)                       | NM_018293    | 100   | 93.3   | 0.01839 | 1.158 |
| ZNF654  | zinc finger protein 654(ZNF654)                       | NM_018293    | 101.7 | 99.2   | 0.01839 | 1.158 |
| ZNF654  | zinc finger protein 654(ZNF654)                       | NM_018293    | 105.3 | 110.3  | 0.01839 | 1.158 |
|         |                                                       | XM_001724542 | 109.3 | 131.8  | 0.0184  | 1.422 |
| MIR939  | microRNA 939(MIR939)                                  | NR_030635    | 116.6 | 110.5  | 0.01851 | 0.874 |
|         |                                                       | XR_017667    | 9770  | 7036.8 | 0.01851 | 0.742 |
| E2F1    | E2F transcription factor 1(E2F1)                      | NM_005225    | 171.1 | 168.6  | 0.01852 | 1.461 |
| GADD45A | growth arrest and DNA damage inducible alpha(GADD45A) | NM_001924    | 104.9 | 99.7   | 0.01853 | 0.763 |
| ITGB2   | integrin subunit beta 2(ITGB2)                        | NM_000211    | 708.1 | 576.7  | 0.01855 | 0.69  |



|       |                                                         |              |       |       |         |       |           |       |       |
|-------|---------------------------------------------------------|--------------|-------|-------|---------|-------|-----------|-------|-------|
| CCL19 | C-C motif chemokine ligand 19(CCL19)                    | NM_006274    | 110.3 | 112.8 | 0.01867 | 1.212 | NM_017196 | 14.73 | 0.69  |
| OR1K1 | olfactory receptor family 1 subfamily K member 1(OR1K1) | NM_080859    | 100   | 94.1  | 0.01873 | 0.87  | NM_017196 | 14.73 | 0.69  |
|       |                                                         | XM_001130104 | 102   | 95.8  | 0.01878 | 0.881 |           |       |       |
|       |                                                         | XM_001126202 | 194.1 | 183   | 0.01883 | 1.428 | NM_017196 | 14.73 | 0.69  |
|       |                                                         | XM_929153    | 93.8  | 96.7  | 0.0189  | 0.859 |           |       |       |
| FANCE | Fanconi anemia complementation group E(FANCE)           | NM_021922    | 177   | 154.6 | 0.01893 | 1.235 |           |       |       |
|       |                                                         | XM_944342    | 106.9 | 97.6  | 0.01896 | 0.875 |           |       |       |
| VARs  | valyl-tRNA synthetase(VARS)                             | NM_006295    | 181.3 | 149   | 0.01902 | 0.727 | NM_031356 | 5.43  | 24.53 |
|       |                                                         | XM_001127768 | 99.9  | 104.9 | 0.01903 | 1.162 | NM_031356 | 5.43  | 24.53 |
|       |                                                         | XM_001725366 | 110.4 | 104.2 | 0.01904 | 0.815 |           |       |       |
| DTX2  | deltex E3 ubiquitin ligase 2(DTX2)                      | NM_020892    | 109.1 | 113.2 | 0.01918 | 1.159 |           |       |       |
| DTX3  | deltex E3 ubiquitin ligase 3(DTX3)                      | NM_178502    | 438   | 382.6 | 0.01918 | 1.159 |           |       |       |
| dhx37 | DEAH-box helicase 37(DHX37)                             | NM_032656    | 133.3 | 112.5 | 0.0192  | 0.836 |           |       |       |
|       |                                                         | XM_940292    | 97    | 93.7  | 0.01925 | 0.888 |           |       |       |

|          |                                                   |                  |       |       |         |       |               |               |
|----------|---------------------------------------------------|------------------|-------|-------|---------|-------|---------------|---------------|
| SLTM     | SAFB like transcription modulator(SLTM)           | NM_0247<br>55    | 132.4 | 131.2 | 0.01929 | 1.268 |               |               |
| SLTM     | SAFB like transcription modulator(SLTM)           | NM_0247<br>55    | 342.5 | 294.3 | 0.01929 | 1.268 |               |               |
| FIGN     | fidgetin, microtubule severing factor(FIGN)       | NM_0180<br>86    | 93.3  | 99.3  | 0.0193  | 1.132 |               |               |
| slx4ip   | SLX4 interacting protein(SLX4IP)                  | NM_0010<br>09608 | 113.6 | 112   | 0.01934 | 1.119 |               |               |
|          |                                                   | XM_93897<br>7    | 116.5 | 111.7 | 0.01935 | 1.138 |               |               |
| SLC25A20 | solute carrier family 25 member 20(SLC25A20)      | NM_0003<br>87    | 95.2  | 103.1 | 0.0194  | 1.43  |               |               |
| SLC25A20 | solute carrier family 25 member 20(SLC25A20)      | NM_0003<br>87    | 212.9 | 290.9 | 0.0194  | 1.43  |               |               |
| TRAF1    | TNF receptor associated factor 1(TRAF1)           | NM_0056<br>58    | 104.5 | 114.2 | 0.01954 | 1.246 |               |               |
| ABTB1    | ankyrin repeat and BTB domain containing 1(ABTB1) | NM_0325<br>48    | 114.2 | 97.5  | 0.01957 | 0.843 |               |               |
| CHAD     | chondroadherin(CHAD)                              | NM_0012<br>67    | 96.4  | 91.9  | 0.01958 | 0.851 | NM_017<br>135 | 41.45<br>2.88 |
| ZFP82    | ZFP82 zinc finger protein(ZFP82)                  | NM_1334<br>66    | 115.8 | 106.4 | 0.01969 | 0.875 | NM_017<br>135 | 41.45<br>2.88 |
|          |                                                   | XM_93123<br>8    | 108.5 | 104.2 | 0.01984 | 0.719 | NM_017<br>135 | 41.45<br>2.88 |
| SHARPN   | SHANK associated RH domain interactor(SHARPIN)    | NM_0309<br>74    | 116.9 | 108.1 | 0.01985 | 0.852 | NM_017<br>135 | 41.45<br>2.88 |
| CALB2    | calbindin 2(CALB2)                                | NM_0070<br>88    | 103.1 | 113.8 | 0.01986 | 1.279 | NM_017<br>135 | 41.45<br>2.88 |

|           |                                                              |              |       |       |         |       |              |            |
|-----------|--------------------------------------------------------------|--------------|-------|-------|---------|-------|--------------|------------|
|           |                                                              | XM_944717    | 98.9  | 93.9  | 0.01987 | 0.858 |              |            |
|           |                                                              | AW168583     | 90.7  | 97.5  | 0.02005 | 1.164 |              |            |
|           |                                                              | XM_928447    | 97.7  | 102.2 | 0.02008 | 1.203 |              |            |
|           |                                                              | XM_001719479 | 107.4 | 105.1 | 0.0201  | 1.136 |              |            |
| SERPIN B7 | serpin family B member 7(SERPINB7)                           | NM_003784    | 102.5 | 100   | 0.02011 | 0.85  |              |            |
| SERPIN B7 | serpin family B member 7(SERPINB7)                           | NM_003784    | 123.2 | 109.9 | 0.02011 | 0.85  |              |            |
|           |                                                              | XM_931877    | 98.6  | 103.2 | 0.02017 | 1.102 |              |            |
|           |                                                              | XR_039881    | 115.4 | 102.6 | 0.02022 | 1.218 | NM_001033653 | 43.46 1.56 |
| ARMCX3    | armadillo repeat containing, X-linked 3(ARMCX3)              | NM_177947    | 210.1 | 181.4 | 0.02027 | 0.708 |              |            |
| ARMCX3    | armadillo repeat containing, X-linked 3(ARMCX3)              | NM_177948    | 358.4 | 354.8 | 0.02027 | 0.708 |              |            |
| SYNE1     | spectrin repeat containing nuclear envelope protein 1(SYNE1) | NM_033071    | 86.7  | 87.4  | 0.02027 | 0.74  |              |            |
| SEC63     | SEC63 homolog, protein translocation regulator(SEC63)        | NM_007214    | 103.2 | 112.3 | 0.02028 | 1.168 |              |            |

|        |                                                             |               |       |       |         |       |
|--------|-------------------------------------------------------------|---------------|-------|-------|---------|-------|
| TMEM57 | transmembrane protein<br>57(TMEM57)                         | NM_0182<br>02 | 302.2 | 259   | 0.02049 | 1.361 |
|        |                                                             | XR_01927<br>0 | 99.9  | 97.2  | 0.02052 | 0.878 |
| PA2G4  | proliferation-associated<br>2G4(PA2G4)                      | NM_0061<br>91 | 118.1 | 124.9 | 0.02056 | 1.19  |
|        |                                                             | AI056317      | 98.3  | 91.3  | 0.02066 | 0.898 |
|        |                                                             | XR_04176<br>1 | 99    | 104   | 0.02066 | 1.204 |
| NOM1   | nucleolar protein with<br>MIF4G domain 1(NOM1)              | NM_1384<br>00 | 99.5  | 90.9  | 0.02067 | 0.767 |
| HS6ST2 | heparan sulfate 6-O-<br>sulfotransferase<br>2(HS6ST2)       | NM_1471<br>75 | 107.9 | 109.4 | 0.02068 | 1.102 |
| SRSF3  | serine and arginine rich<br>splicing factor 3(SRSF3)        | NM_0030<br>17 | 140.1 | 138.1 | 0.02078 | 0.742 |
| BTBD6  | BTB domain containing<br>6(BTBD6)                           | NM_0332<br>71 | 124.3 | 116.8 | 0.02099 | 0.874 |
| BTBD3  | BTB domain containing<br>3(BTBD3)                           | NM_0149<br>62 | 92.5  | 88.5  | 0.02099 | 0.874 |
| EP300  | E1A binding protein<br>p300(EP300)                          | NM_0014<br>29 | 104.5 | 106.6 | 0.02102 | 1.149 |
| GSTTP2 | glutathione S-<br>transferase theta<br>pseudogene 2(GSTTP2) | NR_00308<br>2 | 176.8 | 173.7 | 0.0211  | 1.158 |

|         |                                                               |              |       |       |         |       |           |       |       |
|---------|---------------------------------------------------------------|--------------|-------|-------|---------|-------|-----------|-------|-------|
| GSTT2B  | glutathione S-transferase theta 2B (gene/pseudogene)(GS TT2B) | NM_001080843 | 92.2  | 106.7 | 0.0211  | 1.158 |           |       |       |
| TM7SF3  | transmembrane 7 superfamily member 3(TM7SF3)                  | NM_016551    | 131.8 | 120.2 | 0.02121 | 0.767 |           |       |       |
| RBM10   | RNA binding motif protein 10(RBM10)                           | NM_152856    | 311.5 | 312.6 | 0.02124 | 1.256 |           |       |       |
|         |                                                               | XM_001713713 | 96.3  | 92.3  | 0.02127 | 0.907 |           |       |       |
| OBSL1   | obscurin like 1(OBSL1)                                        | NM_015311    | 104.6 | 114.2 | 0.02128 | 1.22  |           |       |       |
| cemip   | cell migration inducing hyaluronan binding protein(CEMIP)     | NM_018689    | 99.3  | 96.4  | 0.02131 | 0.883 |           |       |       |
| CCS     | copper chaperone for superoxide dismutase(CCS)                | NM_005125    | 104.2 | 111.5 | 0.02143 | 1.276 |           |       |       |
| CCSER2  | coiled-coil serine rich protein 2(CCSER2)                     | NM_018999    | 117.4 | 111.4 | 0.02143 | 1.276 | NM_134407 | 50.47 | 11.16 |
| CSN1S1  | casein alpha s1(CSN1S1)                                       | NM_001890    | 98.7  | 102.3 | 0.02143 | 1.131 |           |       |       |
| FAHD1   | fumarylacetoacetate hydrolase domain containing 1(FAHD1)      | NM_001018104 | 318.4 | 348.8 | 0.02146 | 1.212 |           |       |       |
| ZFYVE28 | zinc finger FYVE-type containing 28(ZFYVE28)                  | NM_020972    | 92.3  | 96.8  | 0.02152 | 1.133 |           |       |       |
| TNIP2   | TNFAIP3 interacting protein 2(TNIP2)                          | NM_024309    | 108.2 | 102.8 | 0.02163 | 0.884 |           |       |       |

|        |                                                       |               |       |       |         |       |
|--------|-------------------------------------------------------|---------------|-------|-------|---------|-------|
|        | olfactory receptor family<br>11 subfamily H member    | NM_0010       |       |       |         |       |
| OR11H1 | 1(OR11H1)                                             | 05239         | 98.6  | 95.5  | 0.02163 | 0.796 |
| SPTBN5 | spectrin beta, non-<br>erythrocytic 5(SPTBN5)         | NM_0166<br>42 | 131.5 | 123.8 | 0.02163 | 0.785 |
|        |                                                       | XR_01640<br>0 | 98.2  | 93.9  | 0.02165 | 0.884 |
|        |                                                       | XR_01621<br>8 | 114.4 | 112.6 | 0.0218  | 0.428 |
| SKAP2  | src kinase associated<br>phosphoprotein<br>2(SKAP2)   | NM_0039<br>30 | 95    | 93.7  | 0.02188 | 0.803 |
| SKAP2  | src kinase associated<br>phosphoprotein<br>2(SKAP2)   | NM_0039<br>30 | 210   | 162.9 | 0.02188 | 0.803 |
|        |                                                       | XM_93051<br>2 | 95.6  | 100.7 | 0.02189 | 1.191 |
|        |                                                       | XR_01630<br>2 | 83.5  | 92.6  | 0.02199 | 1.169 |
| RAMP3  | receptor activity<br>modifying protein<br>3(RAMP3)    | NM_0058<br>56 | 135.4 | 126.1 | 0.02208 | 1.338 |
| RAMP3  | receptor activity<br>modifying protein<br>3(RAMP3)    | NM_0058<br>56 | 155.8 | 125.8 | 0.02208 | 1.338 |
| adgra3 | adhesion G protein-<br>coupled receptor<br>A3(ADGRA3) | NM_1452<br>90 | 132.7 | 137.6 | 0.02213 | 1.561 |
| BBS2   | Bardet-Biedl syndrome<br>2(BBS2)                      | NM_0318<br>85 | 314.5 | 330.2 | 0.02224 | 0.766 |

|             |                                                              |                  |       |       |         |       |                  |                |
|-------------|--------------------------------------------------------------|------------------|-------|-------|---------|-------|------------------|----------------|
| BBS4        | Bardet-Biedl syndrome<br>4(BBS4)                             | NM_0330<br>28    | 548.9 | 463.4 | 0.02224 | 0.766 |                  |                |
| PPIL2       | peptidylprolyl isomerase<br>like 2(PPIL2)                    | NM_0143<br>37    | 106.2 | 112.2 | 0.02228 | 1.178 |                  |                |
| PPIL2       | peptidylprolyl isomerase<br>like 2(PPIL2)                    | NM_0143<br>37    | 147.3 | 136.1 | 0.02228 | 1.178 |                  |                |
|             |                                                              | XM_94007<br>9    | 121   | 108.1 | 0.02229 | 0.784 | NM_001<br>033706 | 2.42<br>10.86  |
| C9orf85     | chromosome 9 open<br>reading frame<br>85(C9orf85)            | NM_1825<br>05    | 95.9  | 100.4 | 0.02229 | 1.155 |                  |                |
| TRAPPC<br>4 | trafficking protein<br>particle complex<br>4(TRAPPC4)        | NM_0161<br>46    | 351.4 | 304.6 | 0.0223  | 0.842 |                  |                |
| PTK2        | protein tyrosine kinase<br>2(PTK2)                           | NM_1538<br>31    | 103.7 | 106.5 | 0.0223  | 1.088 |                  |                |
|             |                                                              | XM_93718<br>4    | 95.9  | 98.1  | 0.02234 | 1.158 |                  |                |
|             |                                                              | XM_00171<br>3911 | 97    | 98.4  | 0.0224  | 1.166 |                  |                |
| MS4A6A      | membrane spanning 4-<br>domains A6A(MS4A6A)                  | NM_0223<br>49    | 104.3 | 92    | 0.02245 | 0.891 | NM_153<br>300    | 0.14<br>61.17  |
|             |                                                              | XM_00172<br>2445 | 109.3 | 92.3  | 0.02252 | 0.777 |                  |                |
| setmar      | SET domain and<br>mariner transposase<br>fusion gene(SETMAR) | NM_0065<br>15    | 184.2 | 161.7 | 0.02255 | 0.763 | NM_032<br>416    | 108.51<br>1.87 |

|           |                                                               |                  |        |        |         |       |
|-----------|---------------------------------------------------------------|------------------|--------|--------|---------|-------|
|           | potassium voltage-gated channel subfamily J member 14(KCNJ14) | NM_1707<br>20    | 97.9   | 101.8  | 0.02263 | 1.11  |
| KCNJ14    |                                                               |                  |        |        |         |       |
|           | keratin associated protein 12-1(KRTAP12-1)                    | NM_1816<br>86    | 101.8  | 102.5  | 0.02264 | 1.162 |
| KRTAP12-1 |                                                               |                  |        |        |         |       |
|           | vacuolar protein sorting 13 homolog A(VPS13A)                 | NM_0010<br>18038 | 95.7   | 102.8  | 0.0227  | 1.183 |
| VPS13A    |                                                               |                  |        |        |         |       |
|           | vacuolar protein sorting 13 homolog A(VPS13A)                 | NM_0010<br>18038 | 100.6  | 97.6   | 0.0227  | 1.183 |
| VPS13A    |                                                               |                  |        |        |         |       |
|           | nudix hydrolase 22(NUDT22)                                    | NM_0323<br>44    | 148.6  | 154.3  | 0.02273 | 1.244 |
| NUDT22    |                                                               |                  |        |        |         |       |
|           | potassium voltage-gated channel subfamily J member 4(KCNJ4)   | NM_1528<br>68    | 96.8   | 100.4  | 0.02275 | 1.124 |
| KCNJ4     |                                                               |                  |        |        |         |       |
|           | BICD family like cargo adaptor 2(BICDL2)                      | NM_0011<br>03175 | 209.9  | 205.9  | 0.0228  | 1.275 |
| BICDL2    |                                                               |                  |        |        |         |       |
|           |                                                               | XM_00172<br>3741 | 96.8   | 106.1  | 0.02288 | 1.166 |
|           |                                                               |                  |        |        |         |       |
|           | ribosomal protein lateral stalk subunit P2(RPLP2)             | NM_0010<br>04    | 9850.2 | 8202.3 | 0.02299 | 1.4   |
| RPLP2     |                                                               |                  |        |        |         |       |
|           | BCL6 corepressor-like 1(BCORL1)                               | NM_0219<br>46    | 250.5  | 165.9  | 0.02302 | 0.737 |
| BCORL1    |                                                               |                  |        |        |         |       |
|           | proteasome 26S subunit, non-ATPase 5(PSMD5)                   | NM_0050<br>47    | 156.6  | 143.8  | 0.02303 | 0.834 |
| PSMD5     |                                                               |                  |        |        |         |       |
|           | tubulin tyrosine ligase like 3(TTLL3)                         | NM_0156<br>44    | 102.6  | 98.6   | 0.02307 | 0.901 |
| TTLL3     |                                                               |                  |        |        |         |       |



|         |                                                                   |              |        |       |         |       |              |         |      |
|---------|-------------------------------------------------------------------|--------------|--------|-------|---------|-------|--------------|---------|------|
| TTLL3   | tubulin tyrosine ligase like 3(TTLL3)                             | NM_015644    | 152.3  | 116   | 0.02307 | 0.901 |              |         |      |
| TAGLN   | transgelin(TAGLN)                                                 | NM_003186    | 388.2  | 296.4 | 0.02309 | 0.565 |              |         |      |
| TAGLN   | transgelin(TAGLN)                                                 | NM_003186    | 1629.7 | 1263  | 0.02309 | 0.565 | NM_001191088 | 10.07   | 0.03 |
| ZNF419  | zinc finger protein 419(ZNF419)                                   | NM_001098495 | 117.2  | 122.7 | 0.02311 | 1.195 | NM_001191088 | 10.07   | 0.03 |
| TBP     | TATA-box binding protein(TBP)                                     | NM_003194    | 176.5  | 138.7 | 0.02312 | 0.825 | NM_001191088 | 10.07   | 0.03 |
|         |                                                                   | XM_944734    | 105.6  | 105.9 | 0.02315 | 1.137 |              |         |      |
| SDR16C5 | short chain dehydrogenase/reductase family 16C, member 5(SDR16C5) | NM_138969    | 100.6  | 123   | 0.02318 | 1.399 |              |         |      |
| MANEA   | mannosidase endo-alpha(MANEA)                                     | NM_024641    | 284.5  | 258.2 | 0.0232  | 1.18  |              |         |      |
| MANBAL  | mannosidase beta like(MANBAL)                                     | NM_001003897 | 93.3   | 98    | 0.0232  | 1.18  | NM_012496    | 1095.39 | 8.76 |
| TMUB2   | transmembrane and ubiquitin like domain containing 2(TMUB2)       | NM_001076674 | 96.8   | 102.1 | 0.0232  | 1.093 |              |         |      |
| TAF8    | TATA-box binding protein associated factor 8(TAF8)                | NM_138572    | 106    | 117.7 | 0.02321 | 1.203 |              |         |      |

|              |                                                                                   |                           |       |       |         |       |
|--------------|-----------------------------------------------------------------------------------|---------------------------|-------|-------|---------|-------|
|              | translocase of inner<br>mitochondrial<br>membrane domain<br>containing 1(TIMMDC1) | NM_0165<br>89             | 261.6 | 245.6 | 0.0234  | 1.756 |
| TIMMDC<br>1  |                                                                                   |                           |       |       |         |       |
|              | O-acyltransferase like,<br>pseudogene(OACYLP)                                     | NR_02402<br>1             | 95.9  | 92.1  | 0.02342 | 0.881 |
| OACYLP       |                                                                                   |                           |       |       |         |       |
|              | ADAM metalloproteinase<br>with thrombospondin<br>type 1 motif<br>17(ADAMTS17)     | NM_1390<br>57             | 100.2 | 101.2 | 0.02354 | 1.182 |
| ADAMTS<br>17 |                                                                                   |                           |       |       |         |       |
|              | forkhead box I3(FOXI3)                                                            | NM_0011<br>35649          | 125   | 122.7 | 0.02357 | 1.164 |
| FOXI3        |                                                                                   |                           |       |       |         |       |
|              | forkhead box I1(FOXI1)                                                            | NM_0121<br>88             | 95.4  | 100.1 | 0.02357 | 1.164 |
| FOXI1        |                                                                                   |                           |       |       |         |       |
|              | zinc finger protein<br>839(ZNF839)                                                | BM674906<br>NM_0183<br>35 | 97.4  | 104.6 | 0.02358 | 1.129 |
| ZNF839       |                                                                                   |                           | 115.6 | 122.3 | 0.0236  | 1.15  |
|              |                                                                                   | XM_93648<br>6             | 85.9  | 93.8  | 0.02362 | 1.19  |
|              | receptor activity<br>modifying protein<br>2(RAMP2)                                | NM_0058<br>54             | 120.2 | 108.4 | 0.02364 | 1.231 |
| RAMP2        |                                                                                   |                           |       |       |         |       |
|              | receptor activity<br>modifying protein<br>2(RAMP2)                                | NM_0058<br>54             | 122.1 | 133.9 | 0.02364 | 1.231 |
| RAMP2        |                                                                                   |                           |       |       |         |       |
|              | myotubularin related<br>protein 1(MTMR1)                                          | NM_0038<br>28             | 103.1 | 96.4  | 0.02366 | 0.871 |
| MTMR1        |                                                                                   |                           |       |       |         |       |
|              | annexin A6(ANXA6)                                                                 | NM_0011<br>55             | 97    | 97.9  | 0.02369 | 0.603 |
| ANXA6        |                                                                                   |                           |       |       |         |       |

|               |                                                                        |                  |       |       |         |       |
|---------------|------------------------------------------------------------------------|------------------|-------|-------|---------|-------|
|               |                                                                        | XM_00113<br>0122 | 110.9 | 110.4 | 0.02369 | 0.899 |
|               |                                                                        | XM_00113<br>0122 | 119   | 109.5 | 0.02369 | 0.899 |
|               |                                                                        | XM_49860<br>8    | 95.9  | 94    | 0.0237  | 0.897 |
| UQCR11        | ubiquinol-cytochrome c<br>reductase, complex III<br>subunit XI(UQCR11) | NM_0068<br>30    | 102.6 | 110.8 | 0.02379 | 1.137 |
| KRTAP1<br>3-3 | keratin associated<br>protein 13-3(KRTAP13-<br>3)                      | NM_1816<br>22    | 106.2 | 101.1 | 0.02383 | 1.117 |
| FAM76B        | family with sequence<br>similarity 76 member<br>B(FAM76B)              | NM_1446<br>64    | 101.8 | 111.2 | 0.02384 | 1.21  |
| NAPEPL<br>D   | N-acyl<br>phosphatidylethanolami<br>ne phospholipase<br>D(NAPEPLD)     | NM_1989<br>90    | 109.8 | 105.8 | 0.02406 | 0.842 |
| NAPEPL<br>D   | N-acyl<br>phosphatidylethanolami<br>ne phospholipase<br>D(NAPEPLD)     | NM_1989<br>90    | 136.7 | 129.8 | 0.02406 | 0.842 |
| STAR          | steroidogenic acute<br>regulatory<br>protein(STAR)                     | NM_0010<br>07243 | 107   | 91.7  | 0.02412 | 0.732 |
| WDR4          | WD repeat domain<br>4(WDR4)                                            | NM_0336<br>61    | 100.8 | 100.2 | 0.02415 | 1.118 |
| BPIFB3        | BPI fold containing<br>family B member<br>3(BPIFB3)                    | NM_1826<br>58    | 105   | 105.1 | 0.02418 | 1.174 |

|             |                                                                   |                  |       |       |         |       |
|-------------|-------------------------------------------------------------------|------------------|-------|-------|---------|-------|
|             |                                                                   | BX102609         | 97.7  | 94.7  | 0.02426 | 0.88  |
| PRUNE2      | prune homolog<br>2(PRUNE2)                                        | NM_1388<br>18    | 101   | 109.8 | 0.02429 | 1.351 |
| PRUNE2      | prune homolog<br>2(PRUNE2)                                        | NM_1388<br>18    | 101.6 | 102.3 | 0.02429 | 1.351 |
| TRAPPC<br>2 | trafficking protein<br>particle complex<br>2(TRAPPC2)             | NM_0145<br>63    | 100.3 | 90.3  | 0.02438 | 0.846 |
| TRAPPC<br>2 | trafficking protein<br>particle complex<br>2(TRAPPC2)             | NM_0145<br>63    | 204.2 | 161.1 | 0.02438 | 0.846 |
| MLEC        | malectin(MLEC)                                                    | NM_0147<br>30    | 226.4 | 205.3 | 0.02445 | 1.294 |
| MLEC        | malectin(MLEC)                                                    | NM_0147<br>30    | 530.9 | 526.3 | 0.02445 | 1.294 |
| RNF215      | ring finger protein<br>215(RNF215)                                | NM_0010<br>17981 | 101.8 | 89.7  | 0.0245  | 0.865 |
|             |                                                                   | XM_93383<br>6    | 104.9 | 105.5 | 0.02463 | 1.098 |
| GALNT1<br>0 | polypeptide N-<br>acetylgalactosaminyltra<br>nsferase 10(GALNT10) | NM_0175<br>40    | 144   | 142.8 | 0.02463 | 1.372 |
| PCGF6       | polycomb group ring<br>finger 6(PCGF6)                            | NM_0010<br>11663 | 94.3  | 91.5  | 0.02464 | 0.859 |
| KLHDC8<br>B | kelch domain containing<br>8B(KLHDC8B)                            | NM_1735<br>46    | 99    | 101.9 | 0.02474 | 1.127 |
|             |                                                                   | XM_93035<br>0    | 121.4 | 116.3 | 0.02484 | 1.183 |

|         |                                                         |                  |       |       |         |       |               |               |
|---------|---------------------------------------------------------|------------------|-------|-------|---------|-------|---------------|---------------|
| KANK3   | KN motif and ankyrin repeat domains 3(KANK3)            | NM_1984<br>71    | 92    | 96.5  | 0.02484 | 1.131 |               |               |
| BACH2   | BTB domain and CNC homolog 2(BACH2)                     | NM_0218<br>13    | 95    | 99.7  | 0.02486 | 1.145 |               |               |
| BACH2   | BTB domain and CNC homolog 2(BACH2)                     | NM_0218<br>13    | 110.5 | 88.8  | 0.02486 | 1.145 |               |               |
| BACH2   | BTB domain and CNC homolog 2(BACH2)                     | NM_0218<br>13    | 125.9 | 97.7  | 0.02486 | 1.145 |               |               |
| HERPUD2 | HERPUD family member 2(HERPUD2)                         | NM_0223<br>73    | 100.6 | 106.9 | 0.02489 | 1.125 | NM_013<br>059 | 21.02<br>0.11 |
| HES1    | hes family bHLH transcription factor 1(HES1)            | NM_0055<br>24    | 110.3 | 105.6 | 0.02489 | 1.125 |               |               |
| MTIF2   | mitochondrial translational initiation factor 2(MTIF2)  | NM_0010<br>05369 | 724.5 | 656.1 | 0.02491 | 1.3   |               |               |
| TUSC3   | tumor suppressor candidate 3(TUSC3)                     | NM_0067<br>65    | 92.7  | 97    | 0.02493 | 1.19  |               |               |
| TUSC3   | tumor suppressor candidate 3(TUSC3)                     | NM_0067<br>65    | 162.1 | 190.1 | 0.02493 | 1.19  |               |               |
|         |                                                         | XM_00171<br>5936 | 109.1 | 107.4 | 0.02501 | 1.152 |               |               |
| DZANK1  | double zinc ribbon and ankyrin repeat domains 1(DZANK1) | NM_0010<br>99407 | 99.6  | 91.5  | 0.02504 | 0.83  |               |               |
| ZNF471  | zinc finger protein 471(ZNF471)                         | NM_0208<br>13    | 113.7 | 117.6 | 0.02504 | 1.249 |               |               |
| ZNF471  | zinc finger protein 471(ZNF471)                         | NM_0208<br>13    | 131.7 | 127.7 | 0.02504 | 1.249 |               |               |

|             |                                                       |                  |       |       |         |       |               |       |      |
|-------------|-------------------------------------------------------|------------------|-------|-------|---------|-------|---------------|-------|------|
|             |                                                       | XM_00113<br>2307 | 95.6  | 94.6  | 0.02512 | 0.873 |               |       |      |
| mri1        | methylthioribose-1-<br>phosphate isomerase<br>1(MRI1) | NM_0322<br>85    | 138.6 | 130.6 | 0.02515 | 1.226 |               |       |      |
|             |                                                       | XR_01955<br>1    | 118.8 | 121.1 | 0.02526 | 1.225 |               |       |      |
| ABAT        | 4-aminobutyrate<br>aminotransferase(ABAT)             | NM_0006<br>63    | 114.2 | 120.3 | 0.02539 | 1.135 |               |       |      |
| AATK        | apoptosis associated<br>tyrosine kinase(AATK)         | NM_0010<br>80395 | 107.4 | 106.4 | 0.02539 | 1.135 |               |       |      |
| THUMP<br>D1 | THUMP domain<br>containing 1(THUMPD1)                 | NM_0177<br>36    | 141.6 | 149.7 | 0.02554 | 1.191 | NM_012<br>816 | 19.78 | 2.28 |
| LASP1       | LIM and SH3 protein<br>1(LASP1)                       | NM_0061<br>48    | 94.5  | 102   | 0.02565 | 1.111 | NM_012<br>816 | 19.78 | 2.28 |
|             |                                                       | XM_00171<br>7976 | 101.7 | 107.2 | 0.0257  | 1.106 |               |       |      |
| WVOX        | WW domain containing<br>oxidoreductase(WVOX)          | NM_1307<br>91    | 117.4 | 101.4 | 0.02601 | 0.884 |               |       |      |
| Mt1f        | metallothionein<br>1F(MT1F)                           | NM_0059<br>49    | 107.2 | 107.1 | 0.02606 | 1.153 |               |       |      |
| POTEE       | POTE ankyrin domain<br>family member<br>E(POTEE)      | NM_0010<br>83538 | 105.2 | 98.8  | 0.02607 | 0.867 |               |       |      |
| FLNC        | filamin C(FLNC)                                       | NM_0014<br>58    | 102.5 | 88.9  | 0.02607 | 0.81  |               |       |      |
| SNX29       | sorting nexin 29(SNX29)                               | NM_0010<br>09607 | 122.6 | 117.5 | 0.02623 | 1.306 |               |       |      |

|          |                                                                |              |       |       |         |       |
|----------|----------------------------------------------------------------|--------------|-------|-------|---------|-------|
| GGT1     | gamma-glutamyltransferase 1(GGT1)                              | NM_001032364 | 118.8 | 102.1 | 0.02633 | 0.846 |
| HES5     | hes family bHLH transcription factor 5(HES5)                   | NM_001010926 | 101.4 | 107.2 | 0.02635 | 1.16  |
| EBAG9    | estrogen receptor binding site associated, antigen, 9(EBAG9)   | NM_198120    | 116.1 | 136.2 | 0.02635 | 1.35  |
|          |                                                                | XR_037520    | 108.7 | 105   | 0.02637 | 0.903 |
| MED7     | mediator complex subunit 7(MED7)                               | NM_001100816 | 133.3 | 114.7 | 0.02641 | 0.797 |
| MED7     | mediator complex subunit 7(MED7)                               | NM_001100816 | 138.8 | 130.1 | 0.02641 | 0.797 |
|          |                                                                | BX093647     | 97.4  | 103.2 | 0.02646 | 1.059 |
|          |                                                                | BX111229     | 109.1 | 116.9 | 0.02648 | 1.194 |
|          |                                                                | BX109868     | 124.8 | 118.1 | 0.02649 | 1.126 |
| RINT1    | RAD50 interactor 1(RINT1)                                      | NM_021930    | 124.7 | 125.8 | 0.02653 | 1.177 |
|          |                                                                | XR_019645    | 115.4 | 101.5 | 0.02655 | 0.864 |
| SLC16A10 | solute carrier family 16 member 10(SLC16A10)                   | NM_018593    | 238.6 | 234.4 | 0.02665 | 1.749 |
|          |                                                                | XM_944489    | 251.6 | 275   | 0.02668 | 1.242 |
| CAPZA1   | capping actin protein of muscle Z-line alpha subunit 1(CAPZA1) | NM_006135    | 181.8 | 174.9 | 0.02672 | 1.272 |

|              |                                                                                                                       |                  |       |       |         |       |               |      |       |
|--------------|-----------------------------------------------------------------------------------------------------------------------|------------------|-------|-------|---------|-------|---------------|------|-------|
| AASDHP<br>PT | aminoadipate-<br>semialdehyde<br>dehydrogenase-<br>phosphopantetheinyl<br>transferase(AASDHPPT)<br>protease, serine 3 | NM_0154<br>23    | 96.1  | 93.3  | 0.02681 | 0.881 | NM_031<br>544 | 4.79 | 38.59 |
| PRSS3P<br>2  | pseudogene<br>2(PRSS3P2)<br>chromosome 15 open<br>reading frame                                                       | NR_00129<br>6    | 100.1 | 93.1  | 0.02683 | 1.142 | NM_031<br>544 | 4.79 | 38.59 |
| C15orf5<br>6 | 56(C15orf56)<br>suppression of<br>tumorigenicity 13 (colon<br>carcinoma) (Hsp70<br>interacting<br>protein)(ST13)      | NM_0010<br>39905 | 98.3  | 106.9 | 0.02686 | 1.146 |               |      |       |
| ST13         | small nucleolar RNA,<br>H/ACA box                                                                                     | NM_0039<br>32    | 217.8 | 232.6 | 0.02688 | 1.552 |               |      |       |
| Snora26      | 26(SNORA26)<br>proteasome 26S<br>subunit, non-ATPase                                                                  | NR_00301<br>6    | 113.5 | 98.3  | 0.02695 | 0.84  |               |      |       |
| PSMD7        | 7(PSMD7)<br>major facilitator<br>superfamily domain                                                                   | NM_0028<br>11    | 152.8 | 133.6 | 0.02697 | 0.822 |               |      |       |
| MFSD14<br>B  | containing<br>14B(MFSD14B)<br>major facilitator<br>superfamily domain                                                 | NM_0325<br>58    | 95.4  | 95.9  | 0.02706 | 0.864 |               |      |       |
| MFSD14<br>B  | containing<br>14B(MFSD14B)                                                                                            | NM_0325<br>58    | 101.3 | 95.5  | 0.02706 | 0.864 |               |      |       |



|               |                                                                                   |                  |       |       |         |       |
|---------------|-----------------------------------------------------------------------------------|------------------|-------|-------|---------|-------|
| MFSD14        | major facilitator<br>superfamily domain<br>containing                             | NM_0325          |       |       |         |       |
| B             | 14B(MFSD14B)                                                                      | 58               | 101.7 | 94.1  | 0.02706 | 0.864 |
| MFSD14        | major facilitator<br>superfamily domain<br>containing                             | NM_0325          |       |       |         |       |
| B             | 14B(MFSD14B)                                                                      | 58               | 103   | 98.8  | 0.02706 | 0.864 |
| JADE3         | jade family PHD finger<br>3(JADE3)                                                | NM_0010<br>77445 | 150.5 | 135.7 | 0.02712 | 0.817 |
| SRCAP         | Snf2 related CREBBP<br>activator<br>protein(SRCAP)                                | NM_0066<br>62    | 95.9  | 88.6  | 0.02716 | 0.886 |
|               |                                                                                   | AL602970         | 93.8  | 101.5 | 0.02718 | 1.143 |
|               |                                                                                   | XM_00171<br>6887 | 121.9 | 102.5 | 0.02723 | 0.798 |
| folr1         | folate receptor<br>1(FOLR1)                                                       | NM_0167<br>25    | 124.1 | 103.5 | 0.02737 | 0.781 |
| NAE1          | NEDD8 activating<br>enzyme E1 subunit<br>1(NAE1)                                  | NM_0010<br>18160 | 130.8 | 139.5 | 0.02747 | 0.661 |
| NAE1          | NEDD8 activating<br>enzyme E1 subunit<br>1(NAE1)                                  | NM_0010<br>18160 | 248.3 | 193.4 | 0.02747 | 0.661 |
| LOC284<br>009 | uncharacterized<br>LOC284009(LOC28400<br>9)                                       | NM_0010<br>25459 | 110.2 | 117   | 0.02751 | 1.164 |
| FAM99A        | family with sequence<br>similarity 99 member A<br>(non-protein<br>coding)(FAM99A) | NM_0010<br>14374 | 102.9 | 96    | 0.02757 | 1.139 |

|          |                                              |                  |       |       |         |       |
|----------|----------------------------------------------|------------------|-------|-------|---------|-------|
|          |                                              | XM_00171         |       |       |         |       |
|          |                                              | 5669             | 90.3  | 96.4  | 0.02767 | 1.187 |
|          |                                              | NM_0017          |       |       |         |       |
| CD22     | CD22 molecule(CD22)                          | 71               | 94.4  | 98.4  | 0.02776 | 1.113 |
| SLC25A26 | solute carrier family 25 member 26(SLC25A26) | NM_0010<br>09938 | 101.1 | 98.5  | 0.02781 | 1.124 |
|          | RAS protein activator like 2(RASAL2)         | NM_1706<br>92    | 104.5 | 99.8  | 0.02782 | 1.156 |
|          | syntaxin binding protein 1(STXBP1)           | NM_0010<br>32221 | 100.5 | 104.6 | 0.02784 | 1.143 |
|          |                                              | AF009305         | 97.1  | 97.9  | 0.02795 | 1.177 |
|          | origin recognition complex subunit 1(ORC1)   | NM_0041<br>53    | 115.9 | 102.3 | 0.02801 | 0.866 |
| ORC1     |                                              |                  |       |       |         |       |
|          | kelch like family member 5(KLHL5)            | NM_0010<br>07075 | 108.1 | 105.5 | 0.02802 | 0.644 |
| KLHL5    |                                              |                  |       |       |         |       |
|          | kelch like family member 5(KLHL5)            | NM_0010<br>07075 | 111.3 | 104.6 | 0.02802 | 0.644 |
| KLHL5    |                                              |                  |       |       |         |       |
|          | kelch like family member 5(KLHL5)            | NM_0010<br>07075 | 351.6 | 304.8 | 0.02802 | 0.644 |
| KLHL5    |                                              |                  |       |       |         |       |
|          |                                              | XM_00113         |       |       |         |       |
|          |                                              | 1851             | 131.7 | 134.4 | 0.02806 | 1.163 |
|          |                                              | XM_92985         |       |       |         |       |
|          |                                              | 9                | 131.7 | 120.7 | 0.02807 | 0.809 |
|          | mitochondrial ribosomal protein S2(MRPS2)    | NM_0160<br>34    | 158.8 | 151.8 | 0.0281  | 1.263 |
| MRPS2    |                                              |                  |       |       |         |       |
|          |                                              | CV318379         | 116.5 | 109.4 | 0.02813 | 0.93  |

|           |                                                               |              |       |       |         |       |
|-----------|---------------------------------------------------------------|--------------|-------|-------|---------|-------|
| TIAM2     | T-cell lymphoma invasion and metastasis 2(TIAM2)              | NM_012454    | 90.2  | 83    | 0.02818 | 0.869 |
| ZNF544    | zinc finger protein 544(ZNF544)                               | NM_014480    | 139.9 | 139.6 | 0.02822 | 1.251 |
| MMAA      | methylmalonic aciduria (cobalamin deficiency) cbIA type(MMAA) | NM_172250    | 104.1 | 107.6 | 0.02831 | 1.107 |
| HAX1      | HCLS1 associated protein X-1(HAX1)                            | NM_006118    | 106.2 | 95.5  | 0.02836 | 0.896 |
| NFX1      | nuclear transcription factor, X-box binding 1(NFX1)           | NM_147133    | 125.1 | 115   | 0.02839 | 1.188 |
| NFX1      | nuclear transcription factor, X-box binding 1(NFX1)           | NM_147133    | 136.2 | 123.8 | 0.02839 | 1.188 |
| MINOS1    | mitochondrial inner membrane organizing system 1(MINOS1)      | NM_001032363 | 107.5 | 100.1 | 0.0284  | 1.182 |
| MINOS1    | mitochondrial inner membrane organizing system 1(MINOS1)      | NM_001032363 | 110.6 | 123.7 | 0.0284  | 1.182 |
| c19orf60  | chromosome 19 open reading frame 60(C19orf60)                 | NM_001100419 | 97.5  | 105.4 | 0.02846 | 1.138 |
| LINC00161 | long intergenic non-protein coding RNA 161(LINC00161)         | NR_026552    | 94.1  | 102.4 | 0.02847 | 1.135 |
| SLC9A8    | solute carrier family 9 member A8(SLC9A8)                     | NM_015266    | 99    | 96.4  | 0.02853 | 0.878 |

|         |                                                                          |              |        |       |         |       |
|---------|--------------------------------------------------------------------------|--------------|--------|-------|---------|-------|
| POLR2H  | RNA polymerase II subunit H(POLR2H)                                      | NM_006232    | 160.7  | 168.4 | 0.0286  | 1.217 |
|         |                                                                          | BU734093     | 141.7  | 135.8 | 0.02871 | 1.192 |
| lemd3   | LEM domain containing 3(LEMD3)                                           | NM_014319    | 213.3  | 209.3 | 0.02873 | 1.179 |
|         |                                                                          | XM_931518    | 88.3   | 82.8  | 0.02884 | 0.835 |
| NFYA    | nuclear transcription factor Y subunit alpha(NFYA)                       | NM_002505    | 105.6  | 91.6  | 0.02884 | 0.886 |
|         |                                                                          | AW150545     | 101.2  | 98.4  | 0.02887 | 1.115 |
| PIN1    | peptidylprolyl cis/trans isomerase, NIMA-interacting 1(PIN1)             | NM_006221    | 324    | 338.9 | 0.02887 | 1.19  |
|         |                                                                          | XM_001723251 | 129.5  | 128.5 | 0.02892 | 1.16  |
| RFESD   | Rieske Fe-S domain containing(RFESD)                                     | NM_001131066 | 96.8   | 87.2  | 0.02906 | 0.786 |
| EXO5    | exonuclease 5(EXO5)                                                      | NM_022774    | 98     | 94.6  | 0.02922 | 0.808 |
| EXO5    | exonuclease 5(EXO5)                                                      | NM_022774    | 99.5   | 94.6  | 0.02922 | 0.808 |
| EXO5    | exonuclease 5(EXO5)                                                      | NM_022774    | 1035.5 | 803   | 0.02922 | 0.808 |
| SPDYE8P | speedy/RINGO cell cycle regulator family member E8, pseudogene(SPDIYE8P) | NR_003664    | 106.3  | 92.3  | 0.02929 | 0.727 |

|             |                                                                                  |               |       |         |         |       |
|-------------|----------------------------------------------------------------------------------|---------------|-------|---------|---------|-------|
| SPDYE8<br>P | speedy/RINGO cell<br>cycle regulator family<br>member E8,<br>pseudogene(SPDYE8P) | NR_00366<br>4 | 13009 | 11409.6 | 0.02929 | 0.727 |
| TNRC6A      | trinucleotide repeat<br>containing 6A(TNRC6A)                                    | NM_0144<br>94 | 128.5 | 121.8   | 0.0293  | 0.868 |
| TNRC6A      | trinucleotide repeat<br>containing 6A(TNRC6A)                                    | NM_0144<br>94 | 134.2 | 116.6   | 0.0293  | 0.868 |
| TNRC6A      | trinucleotide repeat<br>containing 6A(TNRC6A)                                    | NM_0144<br>94 | 310.9 | 258.5   | 0.0293  | 0.868 |
| OR7C2       | olfactory receptor family<br>7 subfamily C member<br>2(OR7C2)                    | NM_0123<br>77 | 108.8 | 107.4   | 0.0293  | 1.116 |
| GPS1        | G protein pathway<br>suppressor 1(GPS1)                                          | NM_2124<br>92 | 148.3 | 163.4   | 0.02938 | 0.897 |
| GPS1        | G protein pathway<br>suppressor 1(GPS1)                                          | NM_0041<br>27 | 103.2 | 98.9    | 0.02938 | 0.897 |
| BRI3BP      | BRI3 binding<br>protein(BRI3BP)                                                  | NM_0806<br>26 | 117   | 118     | 0.02938 | 1.772 |
| BRI3BP      | BRI3 binding<br>protein(BRI3BP)                                                  | NM_0806<br>26 | 124.8 | 116.6   | 0.02938 | 1.772 |
| BRI3BP      | BRI3 binding<br>protein(BRI3BP)                                                  | NM_0806<br>26 | 305.1 | 288.1   | 0.02938 | 1.772 |
| NPR3        | natriuretic peptide<br>receptor 3(NPR3)                                          | NM_0009<br>08 | 116.2 | 124.6   | 0.02947 | 1.363 |
| TBC1D9<br>B | TBC1 domain family<br>member 9B(TBC1D9B)                                         | NM_0150<br>43 | 112.5 | 98.2    | 0.02948 | 0.814 |

|        |                          |          |       |       |         |       |
|--------|--------------------------|----------|-------|-------|---------|-------|
|        |                          | BQ021435 | 100.1 | 107.3 | 0.02951 | 1.131 |
|        |                          | XM_00172 |       |       |         |       |
|        |                          | 6935     | 113   | 104   | 0.02951 | 0.692 |
| TMEM23 | transmembrane protein    | NM_0010  |       |       |         |       |
| 7      | 237(TMEM237)             | 44385    | 136.9 | 130.4 | 0.02976 | 0.758 |
|        | chaperonin containing    | NM_0064  |       |       |         |       |
| CCT4   | TCP1 subunit 4(CCT4)     | 30       | 164.5 | 174.9 | 0.02979 | 1.323 |
|        | kelch like family member | NM_0176  |       |       |         |       |
| KLHL28 | 28(KLHL28)               | 58       | 145.5 | 125.2 | 0.02984 | 0.745 |
|        |                          | XM_00113 |       |       |         |       |
|        |                          | 2864     | 96    | 93.4  | 0.0299  | 0.844 |
| SLC17A | solute carrier family 17 | NM_0058  |       |       |         |       |
| 2      | member 2(SLC17A2)        | 35       | 94.3  | 100.6 | 0.02994 | 1.194 |
|        |                          | XR_03825 |       |       |         |       |
|        |                          | 2        | 103.7 | 111.8 | 0.03001 | 0.752 |
|        |                          | XR_03825 |       |       |         |       |
|        |                          | 2        | 610.6 | 508.9 | 0.03001 | 0.752 |
| CD300L | CD300 molecule like      | NM_1452  |       |       |         |       |
| G      | family member            | 73       | 99.2  | 93.7  | 0.03002 | 0.879 |
|        | g(CD300LG)               | NM_1453  |       |       |         |       |
| RTKN2  | rhotekin 2(RTKN2)        | 07       | 101.3 | 92.8  | 0.03003 | 0.879 |
|        | protocadherin gamma      | NM_0320  |       |       |         |       |
| PCDHG  | subfamily A,             | 90       | 115.6 | 102.7 | 0.03005 | 0.866 |
| A10    | 10(PCDHGA10)             | XM_94170 |       |       |         |       |
|        |                          | 6        | 99.8  | 85.9  | 0.03012 | 0.849 |
|        | structure specific       | NM_0031  |       |       |         |       |
| SSRP1  | recognition protein      | 46       | 93    | 87.8  | 0.03019 | 0.886 |
|        | 1(SSRP1)                 |          |       |       |         |       |

|             |                                                                  |                  |        |        |         |       |
|-------------|------------------------------------------------------------------|------------------|--------|--------|---------|-------|
|             |                                                                  | XM_00172<br>5293 | 258.1  | 171.5  | 0.03021 | 0.619 |
|             | KH RNA binding domain containing, signal                         |                  |        |        |         |       |
| KHDRB<br>S3 | transduction associated<br>3(KHDRBS3)                            | NM_0065<br>58    | 536.6  | 500.8  | 0.03022 | 0.757 |
| KDM4B       | lysine demethylase<br>4B(KDM4B)                                  | NM_0150<br>15    | 345.9  | 281.4  | 0.03044 | 0.792 |
| HIKESHI     | Hikeshi, heat shock<br>protein nuclear import<br>factor(HIKESHI) | NM_0164<br>01    | 177.8  | 214.5  | 0.03053 | 1.318 |
|             |                                                                  | XR_03870<br>6    | 360.2  | 335.1  | 0.0306  | 1.329 |
|             |                                                                  | AK021616         | 90.9   | 88.8   | 0.03065 | 0.832 |
|             | retinal outer segment membrane protein                           |                  |        |        |         |       |
| ROM1        | 1(ROM1)                                                          | NM_0003<br>27    | 124    | 142.3  | 0.03065 | 1.154 |
|             |                                                                  | AI263926         | 93.6   | 102.7  | 0.03068 | 1.217 |
| SPO11       | SPO11, initiator of<br>meiotic double stranded<br>breaks(SPO11)  | NM_1982<br>65    | 103.7  | 99.5   | 0.03071 | 0.834 |
| SPO11       | SPO11, initiator of<br>meiotic double stranded<br>breaks(SPO11)  | NM_1982<br>65    | 106.4  | 94.2   | 0.03071 | 0.834 |
| JMJD8       | jumonji domain<br>containing 8(JMJD8)                            | NM_0010<br>05920 | 140.9  | 128.2  | 0.03073 | 1.24  |
| ADD3        | adducin 3(ADD3)                                                  | NM_0011<br>21    | 1598.4 | 1405.8 | 0.03086 | 0.847 |

|        |                                                          |                  |        |        |         |       |
|--------|----------------------------------------------------------|------------------|--------|--------|---------|-------|
| PDE8B  | phosphodiesterase<br>8B(PDE8B)                           | NM_0010<br>29851 | 93.6   | 97.1   | 0.03091 | 1.116 |
| PDE8B  | phosphodiesterase<br>8B(PDE8B)                           | NM_0010<br>29851 | 103.8  | 104.3  | 0.03091 | 1.116 |
| TMED9  | transmembrane p24<br>trafficking protein<br>9(TMED9)     | NM_0175<br>10    | 187.4  | 172.8  | 0.03092 | 0.785 |
| TDP1   | tyrosyl-DNA<br>phosphodiesterase<br>1(TDP1)              | NM_0183<br>19    | 94.5   | 101.4  | 0.03101 | 1.125 |
| TDP1   | tyrosyl-DNA<br>phosphodiesterase<br>1(TDP1)              | NM_0183<br>19    | 97.8   | 100.2  | 0.03101 | 1.125 |
| TDP1   | tyrosyl-DNA<br>phosphodiesterase<br>1(TDP1)              | NM_0183<br>19    | 1550.9 | 1032.5 | 0.03101 | 1.125 |
| FGF21  | fibroblast growth factor<br>21(FGF21)                    | NM_0191<br>13    | 99.7   | 108    | 0.03104 | 1.098 |
| SUZ12  | SUZ12 polycomb<br>repressive complex 2<br>subunit(SUZ12) | NM_0153<br>55    | 493.9  | 371.7  | 0.03109 | 1.517 |
|        |                                                          | XR_03752<br>4    | 130.6  | 109.2  | 0.0311  | 0.819 |
| CUL5   | cullin 5(CUL5)                                           | NM_0034<br>78    | 205.7  | 184.3  | 0.03112 | 0.826 |
| ZNF549 | zinc finger protein<br>549(ZNF549)                       | NM_1532<br>63    | 131.5  | 120.3  | 0.03118 | 0.862 |
| ZNF549 | zinc finger protein<br>549(ZNF549)                       | NM_1532<br>63    | 5630.6 | 3969.7 | 0.03118 | 0.862 |



|               |                                                                           |                  |        |       |         |       |               |       |       |
|---------------|---------------------------------------------------------------------------|------------------|--------|-------|---------|-------|---------------|-------|-------|
| ATP1B1        | ATPase Na+/K+<br>transporting subunit<br>beta 1(ATP1B1)                   | NM_0016<br>77    | 109.6  | 96.6  | 0.0312  | 0.878 | NM_031<br>012 | 19.39 | 0.85  |
|               |                                                                           | XM_93669<br>7    | 101.9  | 105.5 | 0.03128 | 1.112 |               |       |       |
| LOC613<br>206 | myeloproliferative<br>disease associated<br>tumor antigen<br>5(LOC613206) | NM_0010<br>33016 | 92.5   | 88    | 0.03131 | 0.876 |               |       |       |
| PUDP          | pseudouridine 5'-<br>phosphatase(PUDP)                                    | NM_0120<br>80    | 99.4   | 110.4 | 0.03144 | 1.166 |               |       |       |
| PCBP2         | poly(rC) binding protein<br>2(PCBP2)                                      | NM_0010<br>98620 | 1075.5 | 729.4 | 0.03147 | 1.288 | NM_012<br>904 | 10.16 | 55.22 |
| DCUN1<br>D5   | defective in cullin<br>neddylation 1 domain<br>containing 5(DCUN1D5)      | NM_0322<br>99    | 109    | 105.9 | 0.03148 | 1.098 |               |       |       |
|               |                                                                           | XM_00171<br>4155 | 100.1  | 99.8  | 0.03152 | 1.164 |               |       |       |
| GSKIP         | GSK3B interacting<br>protein(GSKIP)                                       | NM_0164<br>72    | 260.7  | 206.5 | 0.03153 | 1.212 |               |       |       |
| CHIC2         | cysteine rich<br>hydrophobic domain<br>2(CHIC2)                           | NM_0121<br>10    | 97     | 109.6 | 0.03167 | 1.166 |               |       |       |
| PNMA1         | paraneoplastic Ma<br>antigen 1(PNMA1)                                     | NM_0060<br>29    | 186.3  | 186.8 | 0.03178 | 0.762 |               |       |       |
| AKAP11        | A-kinase anchoring<br>protein 11(AKAP11)                                  | NM_0162<br>48    | 271.4  | 236.4 | 0.03179 | 0.866 |               |       |       |
| AKAP12        | A-kinase anchoring<br>protein 12(AKAP12)                                  | NM_1444<br>97    | 347.5  | 322.1 | 0.03179 | 0.866 |               |       |       |

|         |                                            |              |       |       |         |       |        |       |
|---------|--------------------------------------------|--------------|-------|-------|---------|-------|--------|-------|
|         |                                            | DA266249     | 97.2  | 90.4  | 0.03191 | 0.864 |        |       |
|         | adhesion G protein-coupled receptor        | NM_0784      |       |       |         |       |        |       |
| ADGRE5  | E5(ADGRE5)                                 | 81           | 104.5 | 105.2 | 0.03199 | 1.093 |        |       |
|         | WD repeat domain                           | NM_0190      |       |       |         |       |        |       |
| WDR44   | 44(WDR44)                                  | 45           | 114.7 | 111   | 0.03201 | 1.146 |        |       |
|         | WD repeat domain                           | NM_0190      |       |       |         |       |        |       |
| WDR44   | 44(WDR44)                                  | 45           | 125.3 | 120.4 | 0.03201 | 1.146 |        |       |
|         | RNA polymerase                             | NM_0050      |       |       |         |       | NM_012 |       |
| POLRMT  | mitochondrial(POLRMT)                      | 35           | 202.6 | 175   | 0.03202 | 0.834 | 823    | 17.52 |
|         |                                            | XM_93896     |       |       |         |       |        | 0.04  |
|         |                                            | 5            | 93.5  | 103.4 | 0.03203 | 1.198 |        |       |
| SLC10A7 | solute carrier family 10 member 7(SLC10A7) | NM_001029998 | 96.7  | 103   | 0.03204 | 0.869 |        |       |
| SLC10A7 | solute carrier family 10 member 7(SLC10A7) | NM_001029998 | 115.6 | 108.9 | 0.03204 | 0.869 |        |       |
|         |                                            | XR_01748     |       |       |         |       |        |       |
|         |                                            | 4            | 115.3 | 111.7 | 0.03211 | 0.457 |        |       |
|         | integrator complex                         | NM_1825      |       |       |         |       |        |       |
| INTS6L  | subunit 6 like(INTS6L)                     | 40           | 110.7 | 110.5 | 0.03221 | 1.206 |        |       |
|         |                                            | NM_0184      |       |       |         |       |        |       |
| SOX18   | SRY-box 18(SOX18)                          | 19           | 256.5 | 228.1 | 0.0323  | 1.323 |        |       |
|         |                                            | XM_00171     |       |       |         |       |        |       |
|         |                                            | 3810         | 450.6 | 407.6 | 0.03235 | 1.904 |        |       |
|         | large tumor suppressor                     | NM_0145      |       |       |         |       |        |       |
| LATS2   | kinase 2(LATS2)                            | 72           | 101.1 | 100.5 | 0.0324  | 1.156 |        |       |
|         |                                            | XM_92954     |       |       |         |       |        |       |
|         |                                            | 1            | 94.6  | 98.8  | 0.03246 | 1.115 |        |       |

|         |                                                                    |          |        |        |         |       |
|---------|--------------------------------------------------------------------|----------|--------|--------|---------|-------|
|         | transmembrane BAX inhibitor motif containing                       | NM_0221  |        |        |         |       |
| TMBIM1  | 1(TMBIM1)                                                          | 52       | 229.2  | 278.1  | 0.03251 | 1.328 |
|         |                                                                    | XM_37772 |        |        |         |       |
|         |                                                                    | 5        | 111.5  | 114.1  | 0.03257 | 1.217 |
| SUPV3L  | Suv3 like RNA helicase(SUPV3L1)                                    | NM_0031  |        |        |         |       |
| 1       |                                                                    | 71       | 129.1  | 116.3  | 0.0326  | 0.894 |
|         | phosphoinositide kinase, FYVE-type zinc finger containing(PIKFYVE) | NM_0150  |        |        |         |       |
| PIKFYVE |                                                                    | 40       | 90.8   | 96.9   | 0.03264 | 1.158 |
|         | decapping mRNA                                                     | NM_1526  |        |        |         |       |
| DCP2    | 2(DCP2)                                                            | 24       | 111.9  | 122.2  | 0.0327  | 1.162 |
|         |                                                                    | XM_93818 |        |        |         |       |
|         |                                                                    | 1        | 7544.4 | 7392.2 | 0.0327  | 1.222 |
|         | tyrosine hydroxylase(TH)                                           | NM_1992  |        |        |         |       |
| TH      |                                                                    | 93       | 94     | 88.2   | 0.03272 | 0.868 |
|         |                                                                    | AI732113 | 109.2  | 110.2  | 0.03273 | 1.11  |
| TSPAN3  | tetraspanin                                                        | NM_0059  |        |        |         |       |
| 1       | 31(TSPAN31)                                                        | 81       | 280.4  | 249.8  | 0.03275 | 1.214 |
|         |                                                                    | BQ186959 | 100.2  | 97.5   | 0.03276 | 1.069 |
|         |                                                                    | XM_00172 |        |        |         |       |
|         |                                                                    | 3047     | 99.5   | 95     | 0.03278 | 0.878 |
|         |                                                                    | XM_93764 |        |        |         |       |
|         |                                                                    | 8        | 106.7  | 103.7  | 0.03278 | 0.879 |
|         | transcription elongation factor A like 9(TCEAL9)                   | NM_0010  |        |        |         |       |
| TCEAL9  |                                                                    | 06612    | 167.3  | 169.6  | 0.0328  | 1.264 |
| RHBDD   | rhomboid domain containing 1(RHBDD1)                               | NM_0322  |        |        |         |       |
| 1       |                                                                    | 76       | 90.9   | 97     | 0.03282 | 1.129 |

|               |                                                             |                  |       |       |         |       |
|---------------|-------------------------------------------------------------|------------------|-------|-------|---------|-------|
| RHBDD<br>1    | rhomboid domain<br>containing 1(RHBDD1)                     | NM_0322<br>76    | 166.5 | 160.2 | 0.03282 | 1.129 |
| POLH          | DNA polymerase<br>eta(POLH)                                 | NM_0065<br>02    | 108   | 91.9  | 0.03282 | 0.775 |
|               |                                                             | XM_49936<br>3    | 92.3  | 87    | 0.03283 | 0.895 |
| H2AFJ         | H2A histone family<br>member J(H2AFJ)                       | NM_1779<br>25    | 129.8 | 116.1 | 0.0329  | 0.622 |
| TAPT1-<br>AS1 | TAPT1 antisense RNA 1<br>(head to head)(TAPT1-<br>AS1)      | CA391675         | 112.2 | 98.4  | 0.03294 | 0.883 |
| CLUAP1        | clusterin associated<br>protein 1(CLUAP1)                   | NM_0150<br>41    | 104.7 | 107.7 | 0.03295 | 0.869 |
| CLUAP1        | clusterin associated<br>protein 1(CLUAP1)                   | NM_0247<br>93    | 110.9 | 104.1 | 0.03295 | 0.869 |
|               |                                                             | XM_37055<br>7    | 98.3  | 90.5  | 0.03298 | 0.864 |
|               |                                                             | XM_37055<br>7    | 111.8 | 105   | 0.03298 | 0.864 |
|               |                                                             | XM_94446<br>9    | 90    | 79.1  | 0.03299 | 0.781 |
| SLC35C<br>2   | solute carrier family 35<br>member C2(SLC35C2)              | NM_1730<br>73    | 141.4 | 136.5 | 0.03302 | 1.131 |
| arfip1        | ADP ribosylation factor<br>interacting protein<br>1(ARFIP1) | NM_0010<br>25595 | 95.4  | 90.7  | 0.03309 | 0.843 |
| FHOD1         | formin homology 2<br>domain containing<br>1(FHOD1)          | NM_0132<br>41    | 220.4 | 322.4 | 0.03315 | 0.463 |

|          |                                                                    |              |       |       |         |       |
|----------|--------------------------------------------------------------------|--------------|-------|-------|---------|-------|
| DISP2    | dispatched RND transporter family member 2(DISP2)                  | NM_033510    | 112.2 | 113.2 | 0.03316 | 1.122 |
| CSE1L    | chromosome segregation 1 like(CSE1L)                               | NM_177436    | 412.3 | 329   | 0.03336 | 0.743 |
| CSE1L    | chromosome segregation 1 like(CSE1L)                               | NM_001316    | 378.1 | 277.6 | 0.03336 | 0.743 |
| TRAPPC6B | trafficking protein particle complex 6B(TRAPPC6B)                  | NM_001079537 | 91.8  | 92.4  | 0.03336 | 0.777 |
| TRAPPC6B | trafficking protein particle complex 6B(TRAPPC6B)                  | NM_001079537 | 109.7 | 102.2 | 0.03336 | 0.777 |
| UFM1     | ubiquitin fold modifier 1(UFM1)                                    | NM_016617    | 209.1 | 185.6 | 0.03344 | 1.324 |
|          |                                                                    | AA454665     | 106.6 | 106.6 | 0.03356 | 1.13  |
| SYNE4    | spectrin repeat containing nuclear envelope family member 4(SYNE4) | NM_001039876 | 98.9  | 91.6  | 0.03363 | 0.903 |
| PSRC1    | proline and serine rich coiled-coil 1(PSRC1)                       | NM_001032290 | 107.7 | 106.5 | 0.03369 | 0.906 |
| PPM1B    | protein phosphatase, Mg2+/Mn2+ dependent 1B(PPM1B)                 | NM_177968    | 492.6 | 429.7 | 0.03382 | 1.302 |
| PLAC9    | placenta specific 9(PLAC9)                                         | NM_001012973 | 137.1 | 135.9 | 0.03384 | 0.603 |

|         |                                                                  |                  |        |        |         |       |               |       |      |
|---------|------------------------------------------------------------------|------------------|--------|--------|---------|-------|---------------|-------|------|
| OR2A1   | olfactory receptor family<br>2 subfamily A member<br>1(OR2A1)    | NM_0010<br>05287 | 101.9  | 91.1   | 0.03389 | 0.87  |               |       |      |
| Uqcrh   | ubiquinol-cytochrome c<br>reductase hinge<br>protein(UQCRH)      | NM_0060<br>04    | 97.5   | 94.4   | 0.0339  | 0.839 |               |       |      |
| Uqcrh   | ubiquinol-cytochrome c<br>reductase hinge<br>protein(UQCRH)      | NM_0060<br>04    | 974.9  | 1252.9 | 0.0339  | 0.839 |               |       |      |
| CSNK2A1 | casein kinase 2 alpha<br>1(CSNK2A1)                              | NM_0018<br>95    | 136.4  | 143.1  | 0.03393 | 0.813 |               |       |      |
| CSNK2A2 | casein kinase 2 alpha<br>2(CSNK2A2)                              | NM_0018<br>96    | 185.3  | 174    | 0.03393 | 0.813 |               |       |      |
| ADCY3   | adenylate cyclase<br>3(ADCY3)                                    | NM_0040<br>36    | 102.3  | 88.5   | 0.03401 | 0.898 |               |       |      |
| PTPA    | protein phosphatase 2<br>phosphatase<br>activator(PTPA)          | NM_1780<br>03    | 108.9  | 110.5  | 0.03408 | 1.127 |               |       |      |
|         |                                                                  | XR_00128<br>0    | 105.8  | 106.1  | 0.03411 | 1.125 |               |       |      |
| MAP3K4  | mitogen-activated<br>protein kinase kinase<br>kinase 4(MAP3K4)   | NM_0059<br>22    | 136.5  | 131    | 0.03415 | 1.193 |               |       |      |
| TRMT10A | tRNA methyltransferase<br>10A(TRMT10A)                           | NM_1522<br>92    | 101    | 96.3   | 0.03425 | 1.133 | NM_017<br>170 | 13.37 | 0.05 |
| EIF4G2  | eukaryotic translation<br>initiation factor 4 gamma<br>2(EIF4G2) | NM_0014<br>18    | 369.1  | 341.9  | 0.03434 | 0.827 |               |       |      |
| EIF4G2  | eukaryotic translation<br>initiation factor 4 gamma<br>2(EIF4G2) | NM_0014<br>18    | 1858.1 | 1378.6 | 0.03434 | 0.827 |               |       |      |

|                  |                                                                  |                  |        |        |         |       |                  |      |       |
|------------------|------------------------------------------------------------------|------------------|--------|--------|---------|-------|------------------|------|-------|
|                  | eukaryotic translation<br>initiation factor 4 gamma<br>2(EIF4G2) | NM_0014<br>18    | 3468.8 | 2977.2 | 0.03434 | 0.827 |                  |      |       |
| KDM2A            | lysine demethylase<br>2A(KDM2A)                                  | NM_0123<br>08    | 102.2  | 108.3  | 0.03439 | 0.91  |                  |      |       |
| spdya            | speedy/RINGO cell<br>cycle regulator family<br>member A(SPDYA)   | NM_1827<br>56    | 94.9   | 100.2  | 0.0345  | 1.15  |                  |      |       |
| MSLNL            | mesothelin-like(MSLNL)                                           | NM_0010<br>25190 | 96.1   | 102    | 0.03452 | 1.157 |                  |      |       |
| MSLNL            | mesothelin-like(MSLNL)                                           | NM_0010<br>25190 | 101.8  | 99.3   | 0.03452 | 1.157 |                  |      |       |
| CEP85L           | centrosomal protein 85<br>like(CEP85L)                           | NM_2069<br>21    | 101.6  | 93.4   | 0.03455 | 0.873 |                  |      |       |
|                  |                                                                  | XM_94237<br>4    | 106    | 96.4   | 0.03461 | 0.818 | NM_001<br>106492 | 2.61 | 10.85 |
| NME2             | NME/NM23 nucleoside<br>diphosphate kinase<br>2(NME2)             | NM_0010<br>18138 | 96.1   | 99.2   | 0.03465 | 1.129 | NM_001<br>106492 | 2.61 | 10.85 |
| ELOVL3           | ELOVL fatty acid<br>elongase 3(ELOVL3)                           | NM_1523<br>10    | 109.3  | 98.8   | 0.03474 | 0.805 | NM_001<br>106492 | 2.61 | 10.85 |
| LOC100<br>996671 | uncharacterized<br>LOC100996671(LOC10<br>0996671)                | BX111310         | 113.8  | 106.8  | 0.03476 | 0.834 |                  |      |       |
| GNL3L            | G protein nucleolar 3<br>like(GNL3L)                             | NM_0190<br>67    | 147.4  | 139.9  | 0.03477 | 0.771 |                  |      |       |
| PUS7L            | pseudouridylate<br>synthase 7 like(PUS7L)                        | NM_0010<br>98615 | 107.1  | 97.3   | 0.03477 | 0.858 |                  |      |       |

|             |                                                                  |               |       |       |         |       |
|-------------|------------------------------------------------------------------|---------------|-------|-------|---------|-------|
|             |                                                                  | XM_94454      |       |       |         |       |
|             |                                                                  | 7             | 114.3 | 112   | 0.03477 | 1.202 |
|             |                                                                  | XM_92996      |       |       |         |       |
|             |                                                                  | 2             | 103.3 | 104.5 | 0.03483 | 1.131 |
|             | DDB1 and CUL4<br>associated factor                               | NM_0243       |       |       |         |       |
| DCAF10      | 10(DCAF10)                                                       | 45            | 527   | 473.7 | 0.03486 | 1.6   |
|             | RAB, member of RAS<br>oncogene family like                       | NM_1738       |       |       |         |       |
| RABL3       | 3(RABL3)                                                         | 25            | 149.1 | 168.3 | 0.0349  | 1.267 |
| RSPH10<br>B | radial spoke head 10<br>homolog B(RSPH10B)                       | NM_1735<br>65 | 93.6  | 90.3  | 0.03491 | 0.762 |
| RSPH10<br>B | radial spoke head 10<br>homolog B(RSPH10B)                       | NM_1735<br>65 | 118   | 111.6 | 0.03491 | 0.762 |
| RSPH10<br>B | radial spoke head 10<br>homolog B(RSPH10B)                       | NM_1735<br>65 | 119.8 | 142.3 | 0.03491 | 0.762 |
| RSPH10<br>B | radial spoke head 10<br>homolog B(RSPH10B)                       | NM_1735<br>65 | 120.8 | 133.7 | 0.03491 | 0.762 |
|             | mitochondrial methionyl-<br>tRNA<br>formyltransferase(MTFM<br>T) | NM_1392<br>42 | 120.9 | 116.6 | 0.03495 | 1.16  |
| MTFMT       |                                                                  |               |       |       |         |       |
|             | mitochondrial methionyl-<br>tRNA<br>formyltransferase(MTFM<br>T) | NM_1392<br>42 | 166.5 | 161.6 | 0.03495 | 1.16  |
| MTFMT       |                                                                  |               |       |       |         |       |
|             | utrophin(UTRN)                                                   | NM_0071<br>24 | 104.4 | 97.4  | 0.03497 | 0.782 |
| UTRN        |                                                                  |               |       |       |         |       |
|             | nucleolar protein                                                | NM_1392       |       |       |         |       |
| NOL6        | 6(NOL6)                                                          | 35            | 136.9 | 115.5 | 0.03505 | 0.772 |



|          |                          |               |        |        |         |       |        |        |
|----------|--------------------------|---------------|--------|--------|---------|-------|--------|--------|
| CAPN10   | calpain 10(CAPN10)       | NM_0230<br>83 | 113.5  | 102.7  | 0.03514 | 1.132 |        |        |
| TBX19    | T-box 19(TBX19)          | NM_0051<br>49 | 98.5   | 104.3  | 0.03515 | 1.151 |        |        |
| TBX19    | T-box 19(TBX19)          | NM_0051<br>49 | 120.8  | 125.9  | 0.03515 | 1.151 |        |        |
|          |                          |               |        |        |         |       | NM_001 |        |
|          |                          | CB858008      | 103.8  | 104.4  | 0.03516 | 1.155 | 270681 | 26.79  |
|          | crystallin lambda        | NM_0159       |        |        |         |       |        | 0.09   |
| CRYL1    | 1(CRYL1)                 | 74            | 95.5   | 89.6   | 0.03517 | 0.872 |        |        |
| KIAA0430 | KIAA0430(KIAA0430)       | NM_0146<br>47 | 99     | 110    | 0.03525 | 1.206 |        |        |
|          | coiled-coil domain       |               |        |        |         |       |        |        |
| CCDC114  | containing               | NM_1445       |        |        |         |       |        |        |
|          | 114(CCDC114)             | 77            | 131.9  | 119.5  | 0.03538 | 0.866 |        |        |
|          |                          | XM_93728      |        |        |         |       |        |        |
|          |                          | 7             | 87.2   | 94.4   | 0.03544 | 1.17  |        |        |
|          | ring finger and SPRY     |               |        |        |         |       |        |        |
|          | domain containing        | NM_1333       |        |        |         |       |        |        |
| RSPRY1   | 1(RSPRY1)                | 68            | 294.2  | 256.2  | 0.03547 | 1.244 |        |        |
|          | RecQ like helicase       | NM_0010       |        |        |         |       |        |        |
| RECQL5   | 5(RECQL5)                | 03716         | 99.3   | 103    | 0.03559 | 1.086 |        |        |
| SLC37A3  | solute carrier family 37 | NM_2071       |        |        |         |       | NM_019 |        |
|          | member 3(SLC37A3)        | 13            | 91.6   | 87.8   | 0.03569 | 0.91  | 373    | 263.23 |
|          | ankyrin repeat domain    | NM_0528       |        |        |         |       |        | 1.01   |
| ankrd40  | 40(ANKRD40)              | 55            | 107.5  | 112.8  | 0.0357  | 0.719 |        |        |
|          | signal recognition       | NM_0031       |        |        |         |       |        |        |
| SRP14    | particle 14(SRP14)       | 34            | 236.8  | 255.8  | 0.03572 | 0.731 |        |        |
|          | signal recognition       | NM_0031       |        |        |         |       |        |        |
| SRP14    | particle 14(SRP14)       | 34            | 2418.6 | 2337.4 | 0.03572 | 0.731 |        |        |

|          |                                                             |              |       |       |         |       |           |             |
|----------|-------------------------------------------------------------|--------------|-------|-------|---------|-------|-----------|-------------|
| AKR1C4   | aldo-keto reductase family 1 member C4(AKR1C4)              | NM_001818    | 117.2 | 113.9 | 0.03575 | 1.309 |           |             |
| AKR1C8P  | aldo-keto reductase family 1 member C8, pseudogene(AKR1C8P) | NM_001007536 | 222.7 | 203.9 | 0.03575 | 1.309 |           |             |
| NABP2    | nucleic acid binding protein 2(NABP2)                       | NM_024068    | 122   | 106.8 | 0.03575 | 0.854 |           |             |
| ZBTB20   | zinc finger and BTB domain containing 20(ZBTB20)            | AK091904     | 536.2 | 613.9 | 0.03575 | 1.512 |           |             |
| EHBP1    | EH domain binding protein 1(EHBP1)                          | NM_015252    | 117.5 | 122.8 | 0.03579 | 1.258 |           |             |
| SLC25A15 | solute carrier family 25 member 15(SLC25A15)                | NM_014252    | 109.6 | 106   | 0.03584 | 0.896 |           |             |
|          |                                                             | XR_038676    | 106   | 96.4  | 0.03588 | 0.887 |           |             |
| ZNF568   | zinc finger protein 568(ZNF568)                             | NM_198539    | 101.6 | 101.2 | 0.03606 | 1.096 |           |             |
| ZNF568   | zinc finger protein 568(ZNF568)                             | NM_198539    | 111.7 | 108.7 | 0.03606 | 1.096 |           |             |
| MAP3K3   | mitogen-activated protein kinase kinase 3(MAP3K3)           | NM_203351    | 119.5 | 116.9 | 0.03609 | 1.197 | NM_012778 | 744.78 0.71 |
| PTPRA    | protein tyrosine phosphatase, receptor type A(PTPRA)        | NM_080840    | 157.4 | 134.9 | 0.03609 | 0.854 | NM_012778 | 744.78 0.71 |
| PTPRA    | protein tyrosine phosphatase, receptor type A(PTPRA)        | NM_080840    | 192.4 | 178.3 | 0.03609 | 0.854 | NM_012778 | 744.78 0.71 |

|          |                                                          |              |        |       |         |       |           |       |         |
|----------|----------------------------------------------------------|--------------|--------|-------|---------|-------|-----------|-------|---------|
|          |                                                          | XM_37420     |        |       |         |       |           |       |         |
|          |                                                          | 0            | 104    | 99.2  | 0.0361  | 1.1   |           |       |         |
| MPG      | N-methylpurine DNA glycosylase(MPG)                      | NM_001015052 | 101.8  | 103.6 | 0.03621 | 1.109 |           |       |         |
| BBS2     | Bardet-Biedl syndrome 2(BBS2)                            | NM_031885    | 124.6  | 112.4 | 0.03625 | 0.855 | NM_012909 | 6.73  | 5427.66 |
|          |                                                          | NM_001001700 | 99.8   | 101   | 0.03631 | 1.126 | NM_022181 | 0.40  | 160.77  |
|          |                                                          | NM_001001700 | 141.1  | 129.8 | 0.03631 | 1.126 | NM_019157 | 14.48 | 0.05    |
|          | ectonucleoside triphosphate diphosphohydrolase 1(ENTPD1) | NM_001098175 | 178.6  | 209.8 | 0.03637 | 1.235 |           |       |         |
| C1orf168 | chromosome 1 open reading frame 168(C1orf168)            | NM_001004303 | 90.7   | 94.6  | 0.03637 | 1.191 |           |       |         |
| YY1      | YY1 transcription factor(YY1)                            | NM_003403    | 282.3  | 279   | 0.03642 | 1.407 |           |       |         |
| YY1      | YY1 transcription factor(YY1)                            | NM_003403    | 1066.2 | 1084  | 0.03642 | 1.407 |           |       |         |
| PREB     | prolactin regulatory element binding(PREB)               | NM_013388    | 138.7  | 150.5 | 0.03647 | 1.191 |           |       |         |
|          |                                                          | BX093763     | 102.8  | 95.7  | 0.03651 | 0.87  |           |       |         |
|          |                                                          | XM_001134421 | 104.6  | 104.5 | 0.03658 | 1.123 |           |       |         |
| MATR3    | matrin 3(MATR3)                                          | NM_199189    | 91.5   | 98.5  | 0.03663 | 1.115 |           |       |         |
| MATR3    | matrin 3(MATR3)                                          | NM_199189    | 107.2  | 96.5  | 0.03663 | 1.115 |           |       |         |

|             |                                                        |                  |        |        |         |       |
|-------------|--------------------------------------------------------|------------------|--------|--------|---------|-------|
| MATR3       | matrin 3(MATR3)                                        | NM_1991<br>89    | 2099.5 | 1825.7 | 0.03663 | 1.115 |
| CAPRIN<br>1 | cell cycle associated<br>protein 1(CAPRIN1)            | NM_0058<br>98    | 244.2  | 279.2  | 0.03664 | 0.718 |
| aire        | autoimmune<br>regulator(AIRE)                          | NM_0006<br>58    | 95.7   | 99.7   | 0.03665 | 1.116 |
| SMG6        | SMG6, nonsense<br>mediated mRNA decay<br>factor(SMG6)  | NM_0175<br>75    | 104.3  | 95.8   | 0.03668 | 0.846 |
| KMT2C       | lysine methyltransferase<br>2C(KMT2C)                  | NM_1706<br>06    | 111.9  | 101.8  | 0.03671 | 0.792 |
| KMT2E       | lysine methyltransferase<br>2E(KMT2E)                  | NM_0186<br>82    | 147.2  | 122    | 0.03671 | 0.792 |
| GALT        | galactose-1-phosphate<br>uridylyltransferase(GAL<br>T) | NM_0001<br>55    | 111    | 102.9  | 0.03675 | 1.239 |
| GAMT        | guanidinoacetate N-<br>methyltransferase(GAM<br>T)     | NM_0001<br>56    | 154    | 156.5  | 0.03675 | 1.239 |
| AGBL5       | ATP/GTP binding<br>protein like 5(AGBL5)               | NM_0218<br>31    | 109.3  | 97.6   | 0.03679 | 0.846 |
|             |                                                        | BG216851         | 93.7   | 103.7  | 0.03681 | 1.164 |
|             |                                                        | XM_93346<br>8    | 113.2  | 108.8  | 0.03689 | 1.105 |
| HSF1        | heat shock transcription<br>factor 1(HSF1)             | NM_0055<br>26    | 98.4   | 99.2   | 0.03691 | 1.128 |
| FBXO48      | F-box protein<br>48(FBXO48)                            | NM_0010<br>24680 | 103.6  | 105.1  | 0.03699 | 1.099 |

|              |                                           |                  |        |        |         |       |               |      |       |
|--------------|-------------------------------------------|------------------|--------|--------|---------|-------|---------------|------|-------|
| IFNA21       | interferon alpha<br>21(IFNA21)            | NM_0021<br>75    | 107.8  | 106.8  | 0.03715 | 0.875 |               |      |       |
| CAPS         | calcyphosine(CAPS)                        | NM_0040<br>58    | 252.4  | 186.3  | 0.03722 | 0.833 |               |      |       |
| MED16        | mediator complex<br>subunit 16(MED16)     | NM_0054<br>81    | 111.1  | 98.2   | 0.03728 | 1.192 |               |      |       |
| MED16        | mediator complex<br>subunit 16(MED16)     | NM_0054<br>81    | 116.1  | 113.6  | 0.03728 | 1.192 | NM_019<br>168 | 8.26 | 61.49 |
| PCBP2        | poly(rC) binding protein<br>2(PCBP2)      | NM_0050<br>16    | 2165.2 | 1520.7 | 0.03738 | 1.259 |               |      |       |
| SLC2A4<br>RG | SLC2A4<br>regulator(SLC2A4RG)             | NM_0200<br>62    | 150.6  | 159.9  | 0.03738 | 1.339 |               |      |       |
|              |                                           | BF054947         | 99.1   | 94.1   | 0.03741 | 0.92  |               |      |       |
|              |                                           | XR_03744<br>2    | 90     | 102    | 0.03752 | 1.168 |               |      |       |
| BEND3        | BEN domain containing<br>3(BEND3)         | NM_0010<br>80450 | 120.3  | 115.2  | 0.03753 | 1.102 |               |      |       |
| RUNX1T<br>1  | RUNX1 translocation<br>partner 1(RUNX1T1) | NM_1756<br>36    | 95.3   | 99.8   | 0.03756 | 1.147 |               |      |       |
| RBM45        | RNA binding motif<br>protein 45(RBM45)    | NM_1529<br>45    | 147.4  | 118.1  | 0.03758 | 0.822 |               |      |       |
|              |                                           | DA804594         | 98.1   | 101.9  | 0.03767 | 1.112 |               |      |       |
|              |                                           | XR_01605<br>4    | 156.9  | 180.8  | 0.03771 | 1.317 |               |      |       |
| CEP41        | centrosomal protein<br>41(CEP41)          | NM_0187<br>18    | 199.8  | 178.6  | 0.03777 | 1.191 |               |      |       |
| bag4         | BCL2 associated<br>athanogene 4(BAG4)     | NM_0048<br>74    | 108.8  | 101.8  | 0.0378  | 1.117 |               |      |       |
|              |                                           | AW97516<br>5     | 107.5  | 101.8  | 0.03783 | 1.119 |               |      |       |

|         |                                                     |              |       |       |         |       |
|---------|-----------------------------------------------------|--------------|-------|-------|---------|-------|
| SLC22A7 | solute carrier family 22 member 7(SLC22A7)          | NM_153320    | 104.6 | 103   | 0.03789 | 1.119 |
| SLC22A7 | solute carrier family 22 member 7(SLC22A7)          | NM_153320    | 350.2 | 461.9 | 0.03789 | 1.119 |
|         |                                                     | XM_001716323 | 97    | 96.5  | 0.03792 | 0.872 |
|         |                                                     | XM_001713618 | 119.8 | 134.3 | 0.03797 | 1.2   |
| MARS    | methionyl-tRNA synthetase(MARS)                     | NM_004990    | 96.4  | 98.5  | 0.03802 | 1.079 |
|         |                                                     | BX098816     | 94.2  | 101.4 | 0.03807 | 1.113 |
| CLCN1   | chloride voltage-gated channel 1(CLCN1)             | NM_000083    | 95.9  | 90.6  | 0.03813 | 0.908 |
| C4orf3  | chromosome 4 open reading frame 3(C4orf3)           | NM_00101701  | 109.9 | 97.7  | 0.03819 | 0.716 |
| C4orf32 | chromosome 4 open reading frame 32(C4orf32)         | NM_152400    | 182.1 | 169.5 | 0.03819 | 0.716 |
| SCN7A   | sodium voltage-gated channel alpha subunit 7(SCN7A) | NM_002976    | 127.2 | 117.9 | 0.03821 | 1.18  |
|         |                                                     | XM_943579    | 104.4 | 92.2  | 0.03823 | 0.876 |
| CTBP2   | C-terminal binding protein 2(CTBP2)                 | NM_001329    | 137.8 | 117.4 | 0.03851 | 0.834 |
| STX6    | syntaxin 6(STX6)                                    | NM_005819    | 171.4 | 158   | 0.03852 | 0.78  |
|         |                                                     | XR_041454    | 100.6 | 101.4 | 0.03854 | 1.093 |

|         |                                                                           |                                |               |                |                    |                |
|---------|---------------------------------------------------------------------------|--------------------------------|---------------|----------------|--------------------|----------------|
| LRIF1   | ligand dependent nuclear receptor interacting factor 1(LRIF1)             | NM_0183<br>72                  | 95.7          | 102.2          | 0.03856            | 1.112          |
| RAB5C   | RAB5C, member RAS oncogene family(RAB5C)                                  | NM_2014<br>34<br>AV700714      | 267.6<br>130  | 255.4<br>115.3 | 0.03861<br>0.03868 | 1.26<br>0.803  |
| ABCC10  | ATP binding cassette subfamily C member 10(ABCC10)                        | NM_0334<br>50                  | 102.1         | 97.2           | 0.0387             | 0.877          |
| TIMM17B | translocase of inner mitochondrial membrane 17 homolog B (yeast)(TIMM17B) | NM_0058<br>34<br>XM_94167<br>7 | 181.2<br>99.8 | 193.7<br>104.6 | 0.03872<br>0.03872 | 1.155<br>1.116 |
| SHB     | SH2 domain containing adaptor protein B(SHB)                              | NM_0030<br>28<br>XM_37190<br>1 | 125<br>96.9   | 132.2<br>94.7  | 0.03877<br>0.03881 | 1.152<br>1.155 |
| RACK1   | receptor for activated C kinase 1(RACK1)                                  | NM_0060<br>98                  | 1944.8        | 1544.5         | 0.03882            | 1.319          |
| CCDC122 | coiled-coil domain containing 122(CCDC122)                                | NM_1449<br>74                  | 112.6         | 119.8          | 0.039              | 1.183          |
| GALNT16 | polypeptide N-acetylgalactosaminyltransferase 16(GALNT16)                 | NM_0206<br>92                  | 100.9         | 107            | 0.03902            | 1.171          |
| FGF23   | fibroblast growth factor 23(FGF23)                                        | NM_0206<br>38                  | 97.4          | 100.3          | 0.03903            | 1.145          |

|         |                                                                      |              |       |       |         |       |
|---------|----------------------------------------------------------------------|--------------|-------|-------|---------|-------|
| PRNP    | prion protein(PRNP)                                                  | NM_183079    | 94.5  | 99.9  | 0.03906 | 1.176 |
|         |                                                                      | XM_001726007 | 101.7 | 104.1 | 0.03917 | 1.142 |
| DCP1A   | decapping mRNA 1A(DCP1A)                                             | NM_018403    | 442.3 | 405.3 | 0.03928 | 0.442 |
| VPS28   | VPS28, ESCRT-I subunit(VPS28)                                        | NM_016208    | 257.1 | 224.2 | 0.03936 | 0.62  |
| VPS28   | VPS28, ESCRT-I subunit(VPS28)                                        | NM_016208    | 445.5 | 357.9 | 0.03936 | 0.62  |
| LAMTOR5 | late endosomal/lysosomal adaptor, MAPK and MTOR activator 5(LAMTOR5) | NM_006402    | 145.5 | 180.3 | 0.0395  | 1.251 |
| DAZ4    | deleted in azoospermia 4(DAZ4)                                       | NM_020420    | 100.4 | 98.9  | 0.03952 | 0.903 |
| ZNF626  | zinc finger protein 626(ZNF626)                                      | NM_001076675 | 105.2 | 101.2 | 0.03953 | 0.674 |
| ZNF626  | zinc finger protein 626(ZNF626)                                      | NM_001076675 | 121.9 | 106.3 | 0.03953 | 0.674 |
| EDF1    | endothelial differentiation related factor 1(EDF1)                   | NM_003792    | 122.9 | 109.2 | 0.03956 | 0.661 |
|         |                                                                      | XM_930172    | 95    | 100.7 | 0.03963 | 1.136 |
|         |                                                                      | XM_937832    | 111   | 109.6 | 0.03963 | 1.13  |
| SFXN3   | sideroflexin 3(SFXN3)                                                | NM_030971    | 113.2 | 115   | 0.03979 | 1.162 |



|        |                                                         |          |       |       |         |       |        |      |       |
|--------|---------------------------------------------------------|----------|-------|-------|---------|-------|--------|------|-------|
|        |                                                         | XR_01698 |       |       |         |       |        |      |       |
|        |                                                         | 4        | 90    | 85.9  | 0.03983 | 0.859 |        |      |       |
| AFTPH  | aftiphilin(AFTPH)                                       | NM_2034  |       |       |         |       |        |      |       |
|        | ArfGAP with GTPase domain, ankyrin repeat and PH domain | 37       | 105.4 | 106.4 | 0.03984 | 1.158 |        |      |       |
| AGAP1  | 1(AGAP1)                                                | NM_0149  |       |       |         |       |        |      |       |
|        |                                                         | 14       | 170.7 | 166.5 | 0.03984 | 1.158 |        |      |       |
| TRIM66 | tripartite motif containing 66(TRIM66)                  | NM_0148  |       |       |         |       | NM_001 |      |       |
|        | protein phosphatase 2 regulatory subunit B              | 18       | 111.5 | 115.9 | 0.03989 | 1.121 | 106061 | 2.22 | 12.22 |
| PPP2R2 | protein phosphatase 2 regulatory subunit B              | NM_1816  |       |       |         |       |        |      |       |
| B      | Bbeta(PPP2R2B)                                          | 76       | 94.3  | 90    | 0.03992 | 0.841 |        |      |       |
| PPP2R2 | protein phosphatase 2 regulatory subunit B              | NM_1816  |       |       |         |       |        |      |       |
| B      | Bbeta(PPP2R2B)                                          | 76       | 138.9 | 174.6 | 0.03992 | 0.841 |        |      |       |
| CCNL2  | cyclin L2(CCNL2)                                        | NM_0309  |       |       |         |       |        |      |       |
|        |                                                         | 37       | 94.3  | 94.2  | 0.03993 | 1.207 |        |      |       |
| CCNO   | cyclin O(CCNO)                                          | NM_0211  |       |       |         |       |        |      |       |
|        |                                                         | 47       | 148.9 | 146.1 | 0.03993 | 1.207 |        |      |       |
|        |                                                         | XM_00113 |       |       |         |       |        |      |       |
|        |                                                         | 3393     | 99.7  | 91.2  | 0.03994 | 0.91  |        |      |       |
|        |                                                         | XM_00113 |       |       |         |       |        |      |       |
|        |                                                         | 3393     | 136.5 | 124.6 | 0.03994 | 0.91  |        |      |       |
| GYS1   | glycogen synthase 1(GYS1)                               | NM_0021  |       |       |         |       |        |      |       |
|        |                                                         | 03       | 107   | 110   | 0.03994 | 1.226 |        |      |       |
| TRDMT1 | tRNA aspartic acid methyltransferase 1(TRDMT1)          | NM_1760  |       |       |         |       |        |      |       |
|        |                                                         | 83       | 98.6  | 105.1 | 0.03995 | 1.126 |        |      |       |

|               |                                                               |                  |        |        |         |       |
|---------------|---------------------------------------------------------------|------------------|--------|--------|---------|-------|
| JPH4          | junctionophilin 4(JPH4)                                       | NM_0324<br>52    | 123.1  | 111.4  | 0.03998 | 0.816 |
|               |                                                               | XM_00171<br>3829 | 97.8   | 90.1   | 0.04012 | 0.863 |
| LOC606<br>724 | coronin 1A<br>pseudogene(LOC60672<br>4)                       | NR_00245<br>4    | 4102.1 | 2649.8 | 0.04015 | 0.694 |
|               |                                                               | XM_92961<br>2    | 102.5  | 108    | 0.0402  | 1.135 |
|               |                                                               | XM_92723<br>8    | 112    | 119.4  | 0.04032 | 1.122 |
| CCT7          | chaperonin containing<br>TCP1 subunit 7(CCT7)                 | NM_0010<br>09570 | 99.2   | 98.7   | 0.04038 | 1.125 |
| ICA1L         | islet cell autoantigen 1<br>like(ICA1L)                       | NM_1782<br>31    | 98.2   | 100.6  | 0.04056 | 1.109 |
|               |                                                               | AA704464         | 105    | 107.4  | 0.04058 | 1.163 |
|               |                                                               | NM_0010<br>18158 | 116.3  | 120    | 0.04059 | 1.188 |
|               |                                                               | XM_94003<br>3    | 97.7   | 100.7  | 0.04069 | 1.146 |
| HNRNP<br>DL   | heterogeneous nuclear<br>ribonucleoprotein D<br>like(HNRNPDL) | NM_0313<br>72    | 1754   | 1190.2 | 0.0407  | 0.741 |
|               |                                                               | XM_93686<br>1    | 104.2  | 102.6  | 0.04073 | 1.157 |
| TMEM17<br>9B  | transmembrane protein<br>179B(TMEM179B)                       | NM_1993<br>37    | 148.7  | 141.3  | 0.04075 | 1.215 |
| TMEM17<br>9B  | transmembrane protein<br>179B(TMEM179B)                       | NM_1993<br>37    | 371.3  | 310.8  | 0.04075 | 1.215 |
|               |                                                               | XM_00171<br>5568 | 122.7  | 117.8  | 0.0408  | 1.106 |

|        |                                          |              |        |        |         |       |
|--------|------------------------------------------|--------------|--------|--------|---------|-------|
| RUNDC1 | RUN domain containing 1(RUNDC1)          | NM_173079    | 94.9   | 94.6   | 0.04083 | 0.851 |
|        |                                          | XM_001128220 | 109.4  | 105.1  | 0.04087 | 1.095 |
| CLDN14 | claudin 14(CLDN14)                       | NM_012130    | 116.2  | 161.5  | 0.04089 | 0.554 |
|        |                                          | XR_018553    | 92.2   | 85.8   | 0.04089 | 0.842 |
|        |                                          | XR_018553    | 3382.9 | 2599.9 | 0.04089 | 0.842 |
| SUMF1  | sulfatase modifying factor 1(SUMF1)      | NM_182760    | 184.7  | 201.5  | 0.04092 | 1.158 |
|        |                                          | XM_937666    | 98.6   | 96.9   | 0.04102 | 1.169 |
| dguok  | deoxyguanosine kinase(DGUOK)             | NM_080916    | 93.7   | 98.1   | 0.04107 | 1.136 |
| MPPE1  | metallophosphoesterase 1(MPPE1)          | NM_023075    | 194.9  | 191.8  | 0.04114 | 1.229 |
| TAZ    | tafazzin(TAZ)                            | NM_181312    | 130.4  | 114    | 0.04118 | 0.858 |
|        |                                          | XM_001732883 | 99     | 104.1  | 0.04121 | 1.128 |
|        |                                          | XM_001126665 | 104.3  | 104.4  | 0.04127 | 1.116 |
|        |                                          | AA909564     | 103.4  | 111.6  | 0.0414  | 1.19  |
| osbpl6 | oxysterol binding protein like 6(OSBPL6) | NM_032523    | 91.8   | 90.1   | 0.04142 | 1.222 |
| osbpl6 | oxysterol binding protein like 6(OSBPL6) | NM_032523    | 118.5  | 118.8  | 0.04142 | 1.222 |

|            |                                                                     |           |       |       |         |       |
|------------|---------------------------------------------------------------------|-----------|-------|-------|---------|-------|
| PSMC6      | proteasome 26S subunit, ATPase 6(PSMC6)                             | NM_002806 | 98.3  | 99.4  | 0.04143 | 1.24  |
| PSMC6      | proteasome 26S subunit, ATPase 6(PSMC6)                             | NM_002806 | 467.8 | 505.9 | 0.04143 | 1.24  |
| HSD17B7    | hydroxysteroid 17-beta dehydrogenase 7(HSD17B7)                     | NM_016371 | 88.7  | 96.3  | 0.04145 | 1.177 |
| INPP5K     | inositol polyphosphate-5-phosphatase K(INPP5K)                      | NM_130766 | 104   | 98.5  | 0.04166 | 0.914 |
| INPPL1     | inositol polyphosphate phosphatase like 1(INPPL1)                   | NM_001567 | 128.2 | 112.2 | 0.04166 | 0.914 |
| HRG        | histidine rich glycoprotein(HRG)                                    | NM_000412 | 92.7  | 95.2  | 0.04169 | 1.117 |
|            |                                                                     | XM_941665 | 301.3 | 348.4 | 0.04175 | 0.695 |
| GUSBP2     | glucuronidase, beta pseudogene 2(GUSBP2)                            | NR_003504 | 96.1  | 106   | 0.04179 | 1.119 |
| CSGALNACT2 | chondroitin sulfate N-acetylgalactosaminyltransferase 2(CSGALNACT2) | NM_018590 | 86.5  | 94.4  | 0.04187 | 1.146 |
| NMD3       | NMD3 ribosome export adaptor(NMD3)                                  | NM_015938 | 98.9  | 95.9  | 0.04188 | 0.874 |

|          |                                                                     |              |       |       |         |       |
|----------|---------------------------------------------------------------------|--------------|-------|-------|---------|-------|
|          | solute carrier family 29                                            |              |       |       |         |       |
| SLC29A1  | member 1 (Augustine blood group)(SLC29A1)                           | NM_001078174 | 112.4 | 100   | 0.04192 | 0.854 |
|          | solute carrier family 29                                            |              |       |       |         |       |
| SLC29A1  | member 1 (Augustine blood group)(SLC29A1)                           | NM_001078174 | 145.7 | 134.3 | 0.04192 | 0.854 |
|          | LMBR1 domain                                                        |              |       |       |         |       |
| LMBRD1   | containing 1(LMBRD1)                                                | NM_018368    | 118.5 | 119.1 | 0.04193 | 1.242 |
|          | XR_041507                                                           |              | 95.3  | 106.8 | 0.04197 | 1.132 |
|          | NM_199160                                                           |              | 90.8  | 86.1  | 0.04201 | 0.903 |
| LHX6     | LIM homeobox 6(LHX6)                                                |              |       |       |         |       |
|          | glycoprotein integral membrane 1(GINM1)                             |              |       |       |         |       |
| GINM1    |                                                                     | NM_138785    | 122.3 | 102.7 | 0.04206 | 0.838 |
|          | gypsy retrotransposon integrase 1(GIN1)                             |              |       |       |         |       |
| GIN1     |                                                                     | NM_017676    | 101.3 | 100.6 | 0.04206 | 0.838 |
|          | WD repeat domain 83(WDR83)                                          |              |       |       |         |       |
| WDR83    |                                                                     | NM_032332    | 123.2 | 113   | 0.04207 | 1.161 |
|          | collagen type IV alpha 5 chain(COL4A5)                              |              |       |       |         |       |
| COL4A5   |                                                                     | NM_000495    | 411.5 | 346.3 | 0.0421  | 1.547 |
|          | collagen type IV alpha 3 binding protein(COL4A3BP)                  |              |       |       |         |       |
| COL4A3BP |                                                                     | NM_005713    | 127.5 | 110.4 | 0.0421  | 1.547 |
|          | apolipoprotein B mRNA editing enzyme catalytic subunit 3H(APOBEC3H) |              |       |       |         |       |
| APOBEC3H |                                                                     | NM_181773    | 83.4  | 86.7  | 0.04211 | 0.859 |

|              |                                                                        |               |       |       |         |       |                  |      |       |
|--------------|------------------------------------------------------------------------|---------------|-------|-------|---------|-------|------------------|------|-------|
| UGGT1        | UDP-glucose<br>glycoprotein<br>glucosyltransferase<br>1(UGGT1)         | NM_0201<br>20 | 151.8 | 128.8 | 0.04211 | 1.303 |                  |      |       |
| TAOK1        | TAO kinase 1(TAOK1)<br>human                                           | NM_0207<br>91 | 114   | 104.4 | 0.04226 | 1.121 |                  |      |       |
| HIVEP3       | immunodeficiency virus<br>type I enhancer binding<br>protein 3(HIVEP3) | BC080552      | 86.7  | 97    | 0.04229 | 1.182 |                  |      |       |
| BCKDH<br>B   | branched chain keto<br>acid dehydrogenase E1<br>subunit beta(BCKDHB)   | NM_0000<br>56 | 134.2 | 153.7 | 0.04231 | 1.319 | NM_001<br>014273 | 3.32 | 15.01 |
| BCKDH<br>B   | branched chain keto<br>acid dehydrogenase E1<br>subunit beta(BCKDHB)   | NM_1830<br>50 | 196   | 178.6 | 0.04231 | 1.319 | NM_001<br>014273 | 3.32 | 15.01 |
| GRIA3        | glutamate ionotropic<br>receptor AMPA type<br>subunit 3(GRIA3)         | NM_0073<br>25 | 168.1 | 159.5 | 0.04234 | 1.452 | NM_001<br>014273 | 3.32 | 15.01 |
| HSD17B<br>12 | hydroxysteroid 17-beta<br>dehydrogenase<br>12(HSD17B12)                | NM_0161<br>42 | 102   | 99.8  | 0.04238 | 0.899 | NM_001<br>014273 | 3.32 | 15.01 |
| HSD17B<br>13 | hydroxysteroid 17-beta<br>dehydrogenase<br>13(HSD17B13)                | NM_1781<br>35 | 508.7 | 618.2 | 0.04238 | 0.899 |                  |      |       |
| ZNF17        | zinc finger protein<br>17(ZNF17)                                       | NM_0069<br>59 | 103.4 | 94.5  | 0.04251 | 0.914 |                  |      |       |
| RCCD1        | RCC1 domain<br>containing 1(RCCD1)                                     | NM_0335<br>44 | 92.8  | 101.2 | 0.04252 | 1.135 |                  |      |       |
| MYO18A       | myosin XVIII A(MYO18A)                                                 | NM_0784<br>71 | 162.4 | 161.7 | 0.04255 | 1.205 |                  |      |       |

|        |                                                                            |                  |       |       |         |       |
|--------|----------------------------------------------------------------------------|------------------|-------|-------|---------|-------|
| LPCAT3 | lysophosphatidylcholine<br>acyltransferase<br>3(LPCAT3)                    | NM_0057<br>68    | 175.9 | 178.8 | 0.04258 | 1.344 |
| jund   | JunD proto-oncogene,<br>AP-1 transcription factor<br>subunit(JUND)         | NM_0053<br>54    | 401   | 464.7 | 0.04266 | 0.375 |
| ZNF621 | zinc finger protein<br>621(ZNF621)                                         | NM_0010<br>98414 | 116.4 | 117.1 | 0.04272 | 1.186 |
| SGK3   | serum/glucocorticoid<br>regulated kinase family<br>member 3(SGK3)          | NM_1707<br>09    | 125.1 | 115.9 | 0.04284 | 1.314 |
| SBSPON | somatomedin B and<br>thrombospondin type 1<br>domain<br>containing(SBSPON) | NM_1532<br>25    | 104.3 | 120.9 | 0.04286 | 1.18  |
| RAD17  | RAD17 checkpoint<br>clamp loader<br>component(RAD17)                       | NM_1333<br>40    | 138.7 | 125.1 | 0.04293 | 0.876 |
| RAD17  | RAD17 checkpoint<br>clamp loader<br>component(RAD17)                       | NM_1333<br>40    | 153.6 | 129.1 | 0.04293 | 0.876 |
| SLC4A1 | solute carrier family 4<br>member 1 (Diego blood<br>group)(SLC4A1)         | NM_0003<br>42    | 138.3 | 212.5 | 0.04306 | 1.716 |
|        |                                                                            | XR_01638<br>5    | 102.5 | 103.5 | 0.0431  | 0.612 |
|        |                                                                            | XM_92634<br>5    | 97    | 102.8 | 0.04316 | 1.121 |
|        |                                                                            | XM_49678<br>3    | 97.3  | 85.6  | 0.0432  | 0.597 |

|        |                                                                              |               |       |       |         |       |
|--------|------------------------------------------------------------------------------|---------------|-------|-------|---------|-------|
| CEPT1  | choline/ethanolamine<br>phosphotransferase<br>1(CEPT1)                       | NM_0060<br>90 | 114.9 | 117.1 | 0.04325 | 1.127 |
|        |                                                                              | XM_93077<br>7 | 126.2 | 108.9 | 0.04327 | 1.189 |
| ENTPD6 | ectonucleoside<br>triphosphate<br>diphosphohydrolase 6<br>(putative)(ENTPD6) | NM_0012<br>47 | 90.4  | 87.2  | 0.04337 | 1.117 |
| ENTPD7 | ectonucleoside<br>triphosphate<br>diphosphohydrolase<br>7(ENTPD7)            | NM_0203<br>54 | 100.4 | 101.5 | 0.04337 | 1.117 |
|        |                                                                              | XM_93744<br>2 | 119.2 | 128   | 0.04341 | 1.186 |
|        |                                                                              | XM_92929<br>7 | 103.1 | 101.2 | 0.04344 | 0.914 |
|        |                                                                              | AW13504<br>5  | 118.2 | 118.4 | 0.0435  | 1.096 |
| VWA8   | von Willebrand factor A<br>domain containing<br>8(VWA8)                      | NM_0150<br>58 | 97.9  | 93.1  | 0.04351 | 0.874 |
| NAIF1  | nuclear apoptosis<br>inducing factor 1(NAIF1)                                | NM_1979<br>56 | 105.6 | 107.1 | 0.04358 | 1.143 |
| NAIF1  | nuclear apoptosis<br>inducing factor 1(NAIF1)                                | NM_1979<br>56 | 132.5 | 121.1 | 0.04358 | 1.143 |



|          |                                                                                    |              |       |       |         |       |
|----------|------------------------------------------------------------------------------------|--------------|-------|-------|---------|-------|
| WHAMM    | WAS protein homolog associated with actin, golgi membranes and microtubules(WHAMM) | NM_001080435 | 145.8 | 127   | 0.0436  | 1.198 |
| MAGEE1   | MAGE family member E1(MAGEE1)                                                      | NM_020932    | 98.4  | 93.2  | 0.04365 | 0.889 |
| MAGEF1   | MAGE family member F1(MAGEF1)                                                      | NM_022149    | 108.8 | 104.2 | 0.04365 | 0.889 |
|          |                                                                                    | XM_928267    | 103.8 | 109.4 | 0.04378 | 1.162 |
| C11orf58 | chromosome 11 open reading frame 58(C11orf58)                                      | NM_001142705 | 142.5 | 149.8 | 0.04381 | 1.168 |
|          |                                                                                    | AW082312     | 95.9  | 100.1 | 0.04392 | 1.109 |
| MSMO1    | methylsterol monooxygenase 1(MSMO1)                                                | NM_001017369 | 96    | 95.8  | 0.04398 | 0.922 |
| MSMO1    | methylsterol monooxygenase 1(MSMO1)                                                | NM_001017369 | 160.9 | 160.5 | 0.04398 | 0.922 |
| YARS     | tyrosyl-tRNA synthetase(YARS)                                                      | NM_003680    | 118.4 | 121.9 | 0.04401 | 1.132 |
| KIAA0368 | KIAA0368(KIAA0368)                                                                 | NM_001080398 | 88.2  | 95.4  | 0.04438 | 1.149 |
|          |                                                                                    | XM_001128895 | 111.7 | 109.7 | 0.04444 | 1.163 |
| CLYBL    | citrate lyase beta like(CLYBL)                                                     | NM_206808    | 106.2 | 108.2 | 0.04467 | 1.17  |
|          |                                                                                    | XR_040448    | 93.4  | 84    | 0.04468 | 0.868 |

|        |                                                                        |               |       |       |         |       |
|--------|------------------------------------------------------------------------|---------------|-------|-------|---------|-------|
|        | cyclin and CBS domain<br>divalent metal cation<br>transport mediator   | NM_0176<br>23 | 98.8  | 100.8 | 0.0447  | 1.101 |
| CNNM3  | 3(CNNM3)                                                               |               |       |       |         |       |
| STK40  | serine/threonine kinase<br>40(STK40)                                   | NM_0320<br>17 | 90.8  | 87.6  | 0.04476 | 1.385 |
| STK40  | serine/threonine kinase<br>40(STK40)                                   | NM_0320<br>17 | 274   | 233.2 | 0.04476 | 1.385 |
|        |                                                                        | XM_21104<br>0 | 100.9 | 95.8  | 0.04476 | 0.887 |
| SFTPA1 | surfactant protein<br>A1(SFTPA1)                                       | NM_0054<br>11 | 86.4  | 94.9  | 0.04479 | 1.342 |
| SOX4   | SRY-box 4(SOX4)                                                        | NM_0031<br>07 | 180.4 | 215.5 | 0.04487 | 0.608 |
| MBTPS1 | membrane bound<br>transcription factor<br>peptidase, site<br>1(MBTPS1) | NM_0037<br>91 | 156.6 | 150.5 | 0.04489 | 1.18  |
| MBTPS1 | membrane bound<br>transcription factor<br>peptidase, site<br>1(MBTPS1) | NM_0037<br>91 | 195.8 | 179.5 | 0.04489 | 1.18  |
|        |                                                                        | XM_93145<br>8 | 97.7  | 95.7  | 0.04495 | 1.154 |
|        |                                                                        | XM_92750<br>6 | 90.8  | 94.8  | 0.045   | 1.16  |
| NUTF2  | nuclear transport factor<br>2(NUTF2)                                   | NM_0057<br>96 | 137.9 | 126.8 | 0.04505 | 1.22  |
| ERGIC3 | ERGIC and golgi<br>3(ERGIC3)                                           | NM_1983<br>98 | 196.6 | 157   | 0.04506 | 1.257 |

|        |                                                |                  |       |       |         |       |
|--------|------------------------------------------------|------------------|-------|-------|---------|-------|
|        | carnitine                                      |                  |       |       |         |       |
| CPT1A  | palmitoyltransferase<br>1A(CPT1A)              | NM_0010<br>31847 | 94.2  | 85.4  | 0.04518 | 0.881 |
| PEX7   | peroxisomal biogenesis<br>factor 7(PEX7)       | NM_0002<br>88    | 201.8 | 164   | 0.04519 | 0.822 |
| CTNNB1 | catenin beta 1(CTNNB1)                         | NM_0010<br>98209 | 96.5  | 96.4  | 0.0452  | 0.697 |
| CTNNB1 | catenin beta 1(CTNNB1)                         | NM_0010<br>98209 | 148.2 | 145.9 | 0.0452  | 0.697 |
| CTNNB1 | catenin beta 1(CTNNB1)                         | NM_0010<br>98209 | 154   | 164.5 | 0.0452  | 0.697 |
|        |                                                | XR_03946<br>6    | 96.4  | 98.5  | 0.04521 | 1.169 |
| MKRN2  | makorin ring finger<br>protein 2(MKRN2)        | NM_0141<br>60    | 223.4 | 182.1 | 0.04524 | 0.778 |
| RP1L1  | retinitis pigmentosa 1<br>like 1(RP1L1)        | NM_1788<br>57    | 97.9  | 91.9  | 0.04545 | 0.873 |
|        |                                                | XR_03951<br>6    | 92.6  | 93.2  | 0.04545 | 1.264 |
|        |                                                | XR_03951<br>6    | 188.3 | 171.5 | 0.04545 | 1.264 |
|        | potassium voltage-gated<br>channel subfamily J |                  |       |       |         |       |
| KCNJ15 | member 15(KCNJ15)                              | NM_1707<br>36    | 99.7  | 90.2  | 0.04551 | 0.91  |
|        |                                                | XM_93150<br>6    | 101   | 97.5  | 0.04557 | 0.91  |
|        |                                                | CN283269         | 110.1 | 101.8 | 0.04559 | 0.921 |

|             |                                                                       |                  |       |       |         |       |
|-------------|-----------------------------------------------------------------------|------------------|-------|-------|---------|-------|
| MAPK3       | mitogen-activated<br>protein kinase<br>3(MAPK3)                       | NM_0010<br>40056 | 96.9  | 91.8  | 0.04562 | 0.908 |
| TCL1B       | T-cell<br>leukemia/lymphoma<br>1B(TCL1B)                              | NM_0049<br>18    | 138.6 | 108.5 | 0.04562 | 1.148 |
| THG1L       | tRNA-histidine<br>guanylyltransferase 1<br>like(THG1L)                | NM_0178<br>72    | 103.1 | 99.4  | 0.04565 | 1.105 |
| TPPP3       | tubulin polymerization<br>promoting protein family<br>member 3(TPPP3) | NM_0159<br>64    | 98.7  | 89.8  | 0.04577 | 0.89  |
| ANKRD3<br>3 | ankyrin repeat domain<br>33(ANKRD33)                                  | NM_1826<br>08    | 99    | 97.6  | 0.04587 | 0.781 |
| MOB4        | MOB family member 4,<br>phocein(MOB4)                                 | NM_0011<br>00819 | 105.6 | 104   | 0.04595 | 0.825 |
| WASF3       | WAS protein family<br>member 3(WASF3)                                 | NM_0066<br>46    | 108.2 | 124.8 | 0.04602 | 1.202 |
| CTDSP1      | CTD small phosphatase<br>1(CTDSP1)                                    | NM_0211<br>98    | 90.5  | 93.2  | 0.04617 | 1.257 |
| CTDSP2      | CTD small phosphatase<br>2(CTDSP2)                                    | NM_0057<br>30    | 287.9 | 256.9 | 0.04617 | 1.257 |
| SLAMF6      | SLAM family member<br>6(SLAMF6)                                       | NM_0529<br>31    | 92.5  | 86.7  | 0.0462  | 0.841 |
| SLAMF6      | SLAM family member<br>6(SLAMF6)                                       | NM_0529<br>31    | 120.4 | 96.9  | 0.0462  | 0.841 |
| tcf20       | transcription factor<br>20(TCF20)                                     | NM_1814<br>92    | 101   | 100.8 | 0.04623 | 1.105 |

|               |                                                                      |                  |       |       |         |       |
|---------------|----------------------------------------------------------------------|------------------|-------|-------|---------|-------|
| tcf20         | transcription factor<br>20(TCF20)                                    | NM_1814<br>92    | 304.4 | 258.7 | 0.04623 | 1.105 |
|               |                                                                      | BM679134         | 114.5 | 109   | 0.04623 | 1.144 |
| TNFRSF<br>11B | TNF receptor<br>superfamily member<br>11b(TNFRSF11B)                 | NM_0025<br>46    | 176.2 | 176   | 0.04628 | 0.539 |
| CHST4         | carbohydrate<br>sulfotransferase<br>4(CHST4)                         | NM_0057<br>69    | 95.6  | 92.2  | 0.04639 | 0.895 |
| FAM162<br>B   | family with sequence<br>similarity 162 member<br>B(FAM162B)          | NM_0010<br>85480 | 100.7 | 98.7  | 0.04639 | 1.108 |
| STK25         | serine/threonine kinase<br>25(STK25)                                 | NM_0063<br>74    | 350.5 | 355.1 | 0.04641 | 1.298 |
|               |                                                                      | XM_92641<br>2    | 101   | 101   | 0.04651 | 1.127 |
|               |                                                                      | XM_00172<br>2392 | 100.1 | 91.8  | 0.04656 | 0.881 |
| RASGR<br>P4   | RAS guanyl releasing<br>protein 4(RASGRP4)                           | NM_0529<br>49    | 108.4 | 114.6 | 0.04659 | 1.118 |
| BCKDH<br>B    | branched chain keto<br>acid dehydrogenase E1<br>subunit beta(BCKDHB) | NM_0000<br>56    | 421.2 | 517.8 | 0.04661 | 1.682 |
| PRDM15        | PR/SET domain<br>15(PRDM15)                                          | NM_0010<br>40424 | 98    | 90.2  | 0.04662 | 0.923 |
| ZNF446        | zinc finger protein<br>446(ZNF446)                                   | NM_0179<br>08    | 159.2 | 134.1 | 0.04674 | 0.828 |
| ZFP36L1       | ZFP36 ring finger<br>protein like 1(ZFP36L1)                         | NM_0049<br>26    | 943   | 789.9 | 0.04683 | 0.684 |

|              |                                                                                               |                  |       |       |         |       |
|--------------|-----------------------------------------------------------------------------------------------|------------------|-------|-------|---------|-------|
| KIF2C        | kinesin family member<br>2C(KIF2C)                                                            | NM_0068<br>45    | 104.9 | 104.8 | 0.04683 | 1.123 |
|              |                                                                                               | XM_92613<br>0    | 141.1 | 123   | 0.04685 | 1.313 |
| MED11        | mediator complex<br>subunit 11(MED11)                                                         | BQ772469         | 115.1 | 95.4  | 0.04688 | 0.892 |
|              |                                                                                               | NM_0010<br>01683 | 92    | 100.3 | 0.04699 | 1.105 |
| TMEM15<br>0B | transmembrane protein<br>150B(TMEM150B)                                                       | NM_0010<br>85488 | 108.7 | 112.9 | 0.04724 | 1.115 |
| DENND<br>2C  | DENN domain<br>containing<br>2C(DENND2C)                                                      | NM_1984<br>59    | 218.2 | 181.2 | 0.04726 | 1.251 |
| MAMST<br>R   | MEF2 activating motif<br>and SAP domain<br>containing<br>transcriptional<br>regulator(MAMSTR) | NM_1825<br>74    | 116.7 | 109.4 | 0.04729 | 0.833 |
|              |                                                                                               | XR_01525<br>9    | 98.8  | 93.5  | 0.04738 | 0.697 |
|              |                                                                                               | XR_01724<br>9    | 93.3  | 88.2  | 0.04739 | 0.829 |
|              |                                                                                               | XM_93050<br>8    | 91.3  | 84    | 0.0474  | 0.773 |
| MKNK2        | MAP kinase interacting<br>serine/threonine kinase<br>2(MKNK2)                                 | NM_0175<br>72    | 579.1 | 427.2 | 0.04743 | 1.568 |
| PBRM1        | polybromo 1(PBRM1)                                                                            | NM_1810<br>42    | 103.3 | 101   | 0.0475  | 0.877 |
| PBRM1        | polybromo 1(PBRM1)                                                                            | NM_1810<br>42    | 113.7 | 94.4  | 0.0475  | 0.877 |

|          |                                                      |              |       |       |         |       |           |             |
|----------|------------------------------------------------------|--------------|-------|-------|---------|-------|-----------|-------------|
| c21orf33 | chromosome 21 open reading frame 33(C21orf33)        | NM_004649    | 101.2 | 96.3  | 0.04761 | 0.886 |           |             |
| GHSR     | growth hormone secretagogue receptor(GHSR)           | NM_198407    | 92.6  | 97.5  | 0.04761 | 1.14  |           |             |
|          |                                                      | XM_001721744 | 122   | 128   | 0.04761 | 1.226 | NM_145089 | 67.02 12.33 |
| KLHL9    | kelch like family member 9(KLHL9)                    | NM_018847    | 115.2 | 103   | 0.04767 | 1.121 |           |             |
| QKI      | QKI, KH domain containing RNA binding(QKI)           | NM_006775    | 98.2  | 93    | 0.04774 | 0.895 | NM_013157 | 76.74 0.47  |
| QKI      | QKI, KH domain containing RNA binding(QKI)           | NM_006775    | 102.4 | 106.3 | 0.04774 | 0.895 | NM_013157 | 76.74 0.47  |
|          |                                                      | XR_016047    | 102.3 | 97    | 0.04774 | 1.138 | NM_013157 | 76.74 0.47  |
| TRAPPC3  | trafficking protein particle complex 3(TRAPPC3)      | NM_014408    | 349   | 308.8 | 0.04783 | 1.167 | NM_013157 | 76.74 0.47  |
| IGFBP2   | insulin like growth factor binding protein 2(IGFBP2) | NM_000597    | 88.8  | 101.1 | 0.04793 | 1.21  |           |             |
| COL18A1  | collagen type XVIII alpha 1 chain(COL18A1)           | NM_130445    | 233.3 | 218   | 0.04794 | 0.769 |           |             |
|          |                                                      | XM_925903    | 100.7 | 98.2  | 0.04795 | 0.875 |           |             |
|          |                                                      | XM_925903    | 103.1 | 90.2  | 0.04795 | 0.875 |           |             |

|                |                                                                          |                  |       |       |         |       |
|----------------|--------------------------------------------------------------------------|------------------|-------|-------|---------|-------|
| LYNX1          | Ly6/neurotoxin<br>1(LYNX1)                                               | NM_1774<br>58    | 100.8 | 90.1  | 0.04813 | 0.905 |
| ZC3H18-<br>AS1 | ZC3H18 antisense RNA<br>1 (head to<br>head)(ZC3H18-AS1)                  | NM_0010<br>01682 | 101.8 | 94.3  | 0.04814 | 0.915 |
| REV3L          | REV3 like, DNA directed<br>polymerase zeta<br>catalytic subunit(REV3L)   | NM_0029<br>12    | 100.2 | 94.6  | 0.04817 | 0.836 |
| ENPP2          | ectonucleotide<br>pyrophosphatase/phosp<br>hodiesterase 2(ENPP2)         | NM_0010<br>40092 | 116   | 107.4 | 0.04824 | 1.141 |
|                |                                                                          | BQ771772         | 108.4 | 106.7 | 0.04828 | 1.121 |
|                |                                                                          | XR_03989<br>1    | 101.8 | 99.2  | 0.04833 | 1.078 |
| ZNF80          | zinc finger protein<br>80(ZNF80)                                         | NM_0071<br>36    | 100.9 | 102.2 | 0.04834 | 1.112 |
| EFEMP1         | EGF containing fibulin<br>like extracellular matrix<br>protein 1(EFEMP1) | NM_0010<br>39348 | 98.8  | 108   | 0.0484  | 1.098 |
| MPHOS<br>PH6   | M-phase<br>phosphoprotein<br>6(MPHOSPH6)                                 | NM_0057<br>92    | 120.3 | 140.9 | 0.04844 | 1.132 |
| ZADH2          | zinc binding alcohol<br>dehydrogenase domain<br>containing 2(ZADH2)      | NM_1759<br>07    | 98.7  | 100.6 | 0.0485  | 1.095 |
| RTN4RL<br>1    | reticulon 4 receptor like<br>1(RTN4RL1)                                  | NM_1785<br>68    | 103.9 | 105   | 0.04862 | 1.097 |



|        |                                                           |                  |       |       |         |       |
|--------|-----------------------------------------------------------|------------------|-------|-------|---------|-------|
| SHANK2 | SH3 and multiple<br>ankyrin repeat domains<br>2(SHANK2)   | NM_0123<br>09    | 165.9 | 212.4 | 0.04863 | 1.469 |
|        |                                                           | XM_00172<br>6649 | 108.3 | 101.4 | 0.04868 | 0.858 |
|        |                                                           | XR_01571<br>6    | 99.9  | 95.9  | 0.04877 | 0.869 |
| AASDH  | aminoadipate-<br>semialdehyde<br>dehydrogenase(AASDH<br>) | NM_1818<br>06    | 148.8 | 131.2 | 0.04877 | 0.839 |
| SNX22  | sorting nexin 22(SNX22)                                   | NM_0247<br>98    | 101.7 | 97.9  | 0.0488  | 0.83  |
| C4BPA  | complement component<br>4 binding protein<br>alpha(C4BPA) | NM_0007<br>15    | 109.4 | 102.1 | 0.04887 | 0.887 |
| RAD21  | RAD21 cohesin<br>complex<br>component(RAD21)              | NM_0062<br>65    | 296.7 | 266.7 | 0.0489  | 1.333 |
| RAD21  | RAD21 cohesin<br>complex<br>component(RAD21)              | NM_0062<br>65    | 498   | 390.6 | 0.0489  | 1.333 |
| OPN5   | opsin 5(OPN5)                                             | NM_0010<br>30051 | 120.6 | 108.4 | 0.04901 | 0.804 |
| lsm11  | LSM11, U7 small<br>nuclear RNA<br>associated(LSM11)       | NM_1734<br>91    | 371   | 312.1 | 0.04901 | 1.17  |
|        |                                                           | XR_04195<br>6    | 110.6 | 102.5 | 0.04909 | 0.852 |

|              |                                                                     |              |        |       |         |       |
|--------------|---------------------------------------------------------------------|--------------|--------|-------|---------|-------|
| COX16        | COX16, cytochrome c oxidase assembly homolog(COX16)                 | NM_016468    | 110    | 105.3 | 0.04912 | 1.149 |
| Cox15        | COX15, cytochrome c oxidase assembly homolog(COX15)                 | NM_078470    | 100.1  | 103.9 | 0.04912 | 1.149 |
| FRMD1        | FERM domain containing 1(FRMD1)                                     | NM_024919    | 109.2  | 100.4 | 0.04917 | 0.917 |
|              |                                                                     | XM_001725183 | 3889.8 | 2672  | 0.0492  | 0.763 |
| LOC100996549 | uncharacterized LOC100996549(LOC100996549)                          | AK094576     | 96.1   | 101.7 | 0.04925 | 1.137 |
| SIGLEC7      | sialic acid binding Ig like lectin 7(SIGLEC7)                       | NM_016543    | 98     | 96    | 0.04931 | 0.896 |
| scaf8        | SR-related CTD associated factor 8(SCAF8)                           | NM_014892    | 143.9  | 129.2 | 0.04939 | 0.805 |
|              |                                                                     | XM_925876    | 100.2  | 105.2 | 0.0494  | 1.148 |
| KPNA3        | karyopherin subunit alpha 3(KPNA3)                                  | NM_002267    | 104.1  | 104.5 | 0.04953 | 0.871 |
| YPEL2        | yippee like 2(YPEL2)                                                | NM_001005404 | 114.5  | 106.3 | 0.04958 | 0.869 |
| C9orf72      | chromosome 9 open reading frame 72(C9orf72)                         | NM_018325    | 135.7  | 142   | 0.0496  | 0.848 |
| HERC2        | HECT and RLD domain containing E3 ubiquitin protein ligase 2(HERC2) | NM_004667    | 110.6  | 108.6 | 0.0496  | 1.167 |

|           |                                                       |              |       |       |         |       |           |      |       |
|-----------|-------------------------------------------------------|--------------|-------|-------|---------|-------|-----------|------|-------|
|           |                                                       | XM_93201     |       |       |         |       |           |      |       |
|           |                                                       | 9            | 98    | 107.3 | 0.04961 | 1.114 |           |      |       |
|           |                                                       | XM_94174     |       |       |         |       |           |      |       |
|           |                                                       | 6            | 94.7  | 95.7  | 0.04968 | 0.846 |           |      |       |
|           | chromosome 16 open reading frame                      |              |       |       |         |       |           |      |       |
| c16orf87  | 87(C16orf87)                                          | NM_00101436  | 226.8 | 267.9 | 0.04969 | 1.162 |           |      |       |
|           | cadherin EGF LAG seven-pass G-type receptor 1(CELSR1) | NM_014246    | 102.5 | 91.4  | 0.0497  | 0.86  | NM_134394 | 3.46 | 15.03 |
| ZNF607    | zinc finger protein 607(ZNF607)                       | NM_032689    | 92.3  | 99.2  | 0.04971 | 1.094 |           |      |       |
| ZNF607    | zinc finger protein 607(ZNF607)                       | NM_032689    | 107   | 98.8  | 0.04971 | 1.094 |           |      |       |
| CPE       | carboxypeptidase E(CPE)                               | NM_001873    | 89.4  | 95.9  | 0.04971 | 1.137 |           |      |       |
| XRN1      | 5'-3' exoribonuclease 1(XRN1)                         | NM_001042604 | 120.6 | 103.6 | 0.04978 | 0.872 |           |      |       |
| KIAA0907  | KIAA0907(KIAA0907)                                    | NM_014949    | 98.4  | 89.4  | 0.0499  | 0.845 |           |      |       |
|           |                                                       | XM_93187     |       |       |         |       |           |      |       |
|           |                                                       | 9            | 206.4 | 152.3 | 0.04994 | 0.525 |           |      |       |
| rab11fip5 | RAB11 family interacting protein 5(RAB11FIP5)         | NM_015470    | 506.4 | 534.8 | 0.04995 | 1.322 |           |      |       |
| PKNOX1    | PBX/knotted 1 homeobox 1(PKNOX1)                      | NM_004571    | 91.9  | 86.3  | 0.04996 | 0.908 |           |      |       |
| PKNOX1    | PBX/knotted 1 homeobox 1(PKNOX1)                      | NM_004571    | 136.7 | 127.3 | 0.04996 | 0.908 |           |      |       |

|       |                           |         |       |       |         |       |
|-------|---------------------------|---------|-------|-------|---------|-------|
|       | olfactory receptor family |         |       |       |         |       |
|       | 2 subfamily W member      | NM_0010 |       |       |         |       |
| OR2W3 | 3(OR2W3)                  | 01957   | 108.8 | 92.8  | 0.04997 | 0.871 |
|       |                           | NM_0010 |       |       |         |       |
|       |                           | 04349   | 103.2 | 106.6 | 0.04999 | 1.142 |
|       | RAB3A, member RAS         |         |       |       |         |       |
|       | oncogene                  | NM_0028 |       |       |         |       |
| RAB3A | family(RAB3A)             | 66      | 93.3  | 99.9  | 0.04999 | 1.127 |
